# Supplementary material for: Are we throwing away good data? Evaluation of chimera detection algorithms on long-read amplicons reveals high false-positive rates across algorithms
Source: PeerJ. 2025 Dec 5;13:e20456. doi: 10.7717/peerj.20456 (PMC12684403; doi:10.7717/peerj.20456)
Supplement: Supplemental Information 3 [file peerj-13-20456-s003.xlsx]

## Sheet: Table S2
Step	Related script
Simulating datatset	https://github.com/alihkz94/long-chimeric-reads-project/blob/main/Simulated_data/simulation.py
Chimera generation	https://github.com/alihkz94/long-chimeric-reads-project/blob/main/Simulated_data/chimera_generator.py

## Sheet: README
Table S2. Presnts the scripts related to the simulation of data and simulated chimeric reads in GitHub repository.
