# Supplementary material for: Are we throwing away good data? Evaluation of chimera detection algorithms on long-read amplicons reveals high false-positive rates across algorithms
Source: PeerJ. 2025 Dec 5;13:e20456. doi: 10.7717/peerj.20456 (PMC12684403; doi:10.7717/peerj.20456)
Supplement: Supplemental Information 4 — The details of the generation of 2,484 simulated chimeric ITS reads designed to benchmark chimera detection algorithms. Each entry specifies a unique chimera identifier, the two parental sequence IDs drawn from the EUKARYOME v1.9.2 database, and the corresponding breakpoint positions determined based on ITS-region-specific probabilities. The table further lists the parental sequence lengths, the resulting chimera length, and the abundance constraints that ensure the artificial chimeras comprise approximately 6.2% of the total dataset, thereby maintaining realistic sequence properties. These parameters, derived from a custom Python simulation script paired with SimLoRD-generated variability, ensure that the simulated artifacts mimic PCR-induced anomalies typical in long-read amplicon sequencing. [file peerj-13-20456-s004.xlsx]

## Sheet: TABLE S3
chimera_id	seq1_id	seq2_id	breakpoint	breakpoint_region	reversed	length	parent1_length	parent2_length	its_region_break
chimera_m389962/1820/CCS|F;size=1_and_m212123/1096/CCS|F;size=1_at_477_ITS2_reversed_no_0	m389962/1820/CCS|F;size=1	m212123/1096/CCS|F;size=1	477	ITS2	no	608	711	608	0.671
chimera_m94182/759/CCS|F;size=2_and_m183526/532/CCS|F;size=1_at_371_ITS2_reversed_no_1	m94182/759/CCS|F;size=2	m183526/532/CCS|F;size=1	371	ITS2	no	474	525	474	0.707
chimera_m116466/1514/CCS|F;size=1_and_m67010/656/CCS|F;size=1_at_52_ITS1_reversed_no_2	m116466/1514/CCS|F;size=1	m67010/656/CCS|F;size=1	52	ITS1	no	483	622	483	0.084
chimera_m156432/676/CCS|F;size=1_and_m142984/1273/CCS|F;size=1_at_172_ITS1_reversed_no_3	m156432/676/CCS|F;size=1	m142984/1273/CCS|F;size=1	172	ITS1	no	547	528	547	0.326
chimera_m401341/1254/CCS|F;size=1_and_m372950/954/CCS|F;size=1_at_451_ITS2_reversed_no_4	m401341/1254/CCS|F;size=1	m372950/954/CCS|F;size=1	451	ITS2	no	605	578	605	0.78
chimera_m382182/1002/CCS|F;size=1_and_m209332/420/CCS|F;size=1_at_136_ITS1_reversed_no_5	m382182/1002/CCS|F;size=1	m209332/420/CCS|F;size=1	136	ITS1	no	420	599	420	0.227
chimera_m61941/977/CCS|F;size=1_and_m36667/587/CCS|F;size=2_at_376_ITS2_reversed_no_6	m61941/977/CCS|F;size=1	m36667/587/CCS|F;size=2	376	ITS2	no	404	510	404	0.737
chimera_m284521/1111/CCS|F;size=1_and_m71150/938/CCS|F;size=1_at_380_ITS2_reversed_no_7	m284521/1111/CCS|F;size=1	m71150/938/CCS|F;size=1	380	ITS2	no	538	538	538	0.706
chimera_m83046/1079/CCS|F;size=1_and_m161580/877/CCS|F;size=1_at_156_ITS1_reversed_no_8	m83046/1079/CCS|F;size=1	m161580/877/CCS|F;size=1	156	ITS1	no	538	508	538	0.307
chimera_m97557/713/CCS|F;size=1_and_m40525/839/CCS|F;size=1_at_119_ITS1_reversed_no_9	m97557/713/CCS|F;size=1	m40525/839/CCS|F;size=1	119	ITS1	no	441	713	441	0.167
chimera_m433290/594/CCS|F;size=1_and_m82190/733/CCS|F;size=1_at_421_ITS2_reversed_no_10	m433290/594/CCS|F;size=1	m82190/733/CCS|F;size=1	421	ITS2	no	488	594	488	0.709
chimera_m259398/895/CCS|F;size=1_and_m163973/806/CCS|F;size=1_at_115_ITS1_reversed_no_11	m259398/895/CCS|F;size=1	m163973/806/CCS|F;size=1	115	ITS1	no	577	511	577	0.225
chimera_m166867/1357/CCS|F;size=1_and_m849/1523/CCS|F;size=125_at_34_ITS1_reversed_no_12	m166867/1357/CCS|F;size=1	m849/1523/CCS|F;size=125	34	ITS1	no	578	496	578	0.069
chimera_m207054/637/CCS|F;size=1_and_m42012/1537/CCS|F;size=1_at_186_ITS1_reversed_no_13	m207054/637/CCS|F;size=1	m42012/1537/CCS|F;size=1	186	ITS1	no	456	535	456	0.348
chimera_m64188/575/CCS|F;size=1_and_m4728/605/CCS|F;size=1_at_266_ITS2_reversed_no_14	m64188/575/CCS|F;size=1	m4728/605/CCS|F;size=1	266	ITS2	no	519	498	519	0.534
chimera_m193383/915/CCS|F;size=2_and_m87281/729/CCS|F;size=1_at_216_5.8S_reversed_no_15	m193383/915/CCS|F;size=2	m87281/729/CCS|F;size=1	216	5.8S	no	473	466	473	0.464
chimera_m15673/859/CCS|F;size=1_and_m184784/700/CCS|F;size=1_at_54_ITS1_reversed_no_16	m15673/859/CCS|F;size=1	m184784/700/CCS|F;size=1	54	ITS1	no	643	457	643	0.118
chimera_m282571/1250/CCS|F;size=1_and_m52386/1760/CCS|F;size=1_at_344_ITS2_reversed_no_17	m282571/1250/CCS|F;size=1	m52386/1760/CCS|F;size=1	344	ITS2	no	633	543	633	0.634
chimera_m10416/918/CCS|F;size=1_and_m277550/815/CCS|F;size=1_at_389_ITS2_reversed_no_18	m10416/918/CCS|F;size=1	m277550/815/CCS|F;size=1	389	ITS2	no	483	577	483	0.674
chimera_m17504/707/CCS|F;size=1_and_m254555/621/CCS|F;size=1_at_100_ITS1_reversed_no_19	m17504/707/CCS|F;size=1	m254555/621/CCS|F;size=1	100	ITS1	no	621	475	621	0.211
chimera_m56378/717/CCS|F;size=1_and_m90684/640/CCS|F;size=1_at_260_ITS2_reversed_no_20	m56378/717/CCS|F;size=1	m90684/640/CCS|F;size=1	260	ITS2	no	500	424	500	0.613
chimera_m243831/831/CCS|F;size=1_and_m193677/681/CCS|F;size=1_at_287_ITS2_reversed_no_21	m243831/831/CCS|F;size=1	m193677/681/CCS|F;size=1	287	ITS2	no	522	453	522	0.634
chimera_m149168/695/CCS|F;size=1_and_m49053/1615/CCS|F;size=1_at_179_5.8S_reversed_no_22	m149168/695/CCS|F;size=1	m49053/1615/CCS|F;size=1	179	5.8S	no	608	473	608	0.378
chimera_m363050/1390/CCS|F;size=1_and_m365619/1587/CCS|F;size=1_at_104_ITS1_reversed_yes_23	m363050/1390/CCS|F;size=1	m365619/1587/CCS|F;size=1	104	ITS1	yes	502	540	502	0.193
chimera_m8849/1148/CCS|F;size=2_and_m229372/1129/CCS|F;size=1_at_261_ITS2_reversed_no_24	m8849/1148/CCS|F;size=2	m229372/1129/CCS|F;size=1	261	ITS2	no	582	458	582	0.57
chimera_m245549/1055/CCS|F;size=1_and_m20713/814/CCS|F;size=1_at_130_ITS1_reversed_no_25	m245549/1055/CCS|F;size=1	m20713/814/CCS|F;size=1	130	ITS1	no	584	528	584	0.246
chimera_m290363/1375/CCS|F;size=1_and_m11267/817/CCS|F;size=1_at_268_ITS2_reversed_no_26	m290363/1375/CCS|F;size=1	m11267/817/CCS|F;size=1	268	ITS2	no	549	507	549	0.529
chimera_m384477/926/CCS|F;size=1_and_m10514/1216/CCS|F;size=2_at_101_ITS1_reversed_no_27	m384477/926/CCS|F;size=1	m10514/1216/CCS|F;size=2	101	ITS1	no	662	494	662	0.204
chimera_m182053/1048/CCS|F;size=1_and_m60913/1027/CCS|F;size=1_at_409_ITS2_reversed_no_28	m182053/1048/CCS|F;size=1	m60913/1027/CCS|F;size=1	409	ITS2	no	595	621	595	0.659
chimera_m365810/1270/CCS|F;size=1_and_m236489/1278/CCS|F;size=1_at_859_ITS2_reversed_no_29	m365810/1270/CCS|F;size=1	m236489/1278/CCS|F;size=1	859	ITS2	no	1139	1186	1139	0.724
chimera_m100009/1575/CCS|F;size=1_and_m156540/1196/CCS|F;size=1_at_472_ITS2_reversed_no_30	m100009/1575/CCS|F;size=1	m156540/1196/CCS|F;size=1	472	ITS2	no	671	562	671	0.84
chimera_m176706/1094/CCS|F;size=2_and_m120236/590/CCS|F;size=1_at_164_ITS1_reversed_no_31	m176706/1094/CCS|F;size=2	m120236/590/CCS|F;size=1	164	ITS1	no	558	532	558	0.308
chimera_m20455/793/CCS|F;size=1_and_m297647/977/CCS|F;size=1_at_107_ITS1_reversed_no_32	m20455/793/CCS|F;size=1	m297647/977/CCS|F;size=1	107	ITS1	no	531	429	531	0.249
chimera_m1429/747/CCS|F;size=1_and_m43173/764/CCS|F;size=1_at_415_ITS2_reversed_no_33	m1429/747/CCS|F;size=1	m43173/764/CCS|F;size=1	415	ITS2	no	582	579	582	0.717
chimera_m126267/604/CCS|F;size=2_and_m191159/1725/CCS|F;size=1_at_272_ITS2_reversed_no_34	m126267/604/CCS|F;size=2	m191159/1725/CCS|F;size=1	272	ITS2	no	594	386	594	0.705
chimera_m5190/949/CCS|F;size=1_and_m12405/1412/CCS|F;size=1_at_334_ITS2_reversed_no_35	m5190/949/CCS|F;size=1	m12405/1412/CCS|F;size=1	334	ITS2	no	711	460	711	0.726
chimera_m55415/949/CCS|F;size=1_and_m138650/455/CCS|F;size=1_at_315_ITS2_reversed_no_36	m55415/949/CCS|F;size=1	m138650/455/CCS|F;size=1	315	ITS2	no	455	641	455	0.491
chimera_m445891/568/CCS|F;size=1_and_m246229/420/CCS|F;size=1_at_321_ITS2_reversed_no_37	m445891/568/CCS|F;size=1	m246229/420/CCS|F;size=1	321	ITS2	no	420	488	420	0.658
chimera_m58769/598/CCS|F;size=1_and_m199855/1745/CCS|F;size=1_at_384_ITS2_reversed_no_38	m58769/598/CCS|F;size=1	m199855/1745/CCS|F;size=1	384	ITS2	no	711	538	711	0.714
chimera_m138067/432/CCS|F;size=1_and_m368519/421/CCS|F;size=1_at_230_ITS2_reversed_no_39	m138067/432/CCS|F;size=1	m368519/421/CCS|F;size=1	230	ITS2	no	421	432	421	0.532
chimera_m15732/290/CCS|F;size=1_and_m68346/1232/CCS|F;size=1_at_228_ITS2_reversed_no_40	m15732/290/CCS|F;size=1	m68346/1232/CCS|F;size=1	228	ITS2	no	461	290	461	0.786
chimera_m218231/1256/CCS|F;size=1_and_m106106/419/CCS|F;size=1_at_279_ITS2_reversed_no_41	m218231/1256/CCS|F;size=1	m106106/419/CCS|F;size=1	279	ITS2	no	419	560	419	0.498
chimera_m109892/442/CCS|F;size=1_and_m397045/830/CCS|T;size=1_at_278_ITS2_reversed_no_42	m109892/442/CCS|F;size=1	m397045/830/CCS|T;size=1	278	ITS2	no	423	442	423	0.629
chimera_m67916/995/CCS|F;size=1_and_m89891/552/CCS|F;size=1_at_365_ITS2_reversed_no_43	m67916/995/CCS|F;size=1	m89891/552/CCS|F;size=1	365	ITS2	no	444	533	444	0.685
chimera_m181713/1430/CCS|F;size=1_and_m322937/879/CCS|F;size=1_at_202_ITS1_reversed_no_44	m181713/1430/CCS|F;size=1	m322937/879/CCS|F;size=1	202	ITS1	no	470	668	470	0.302
chimera_m36615/1743/CCS|F;size=2_and_m103845/375/CCS|F;size=1_at_107_ITS1_reversed_no_45	m36615/1743/CCS|F;size=2	m103845/375/CCS|F;size=1	107	ITS1	no	375	533	375	0.201
chimera_m147628/1076/CCS|F;size=1_and_m213001/776/CCS|F;size=1_at_108_ITS1_reversed_no_46	m147628/1076/CCS|F;size=1	m213001/776/CCS|F;size=1	108	ITS1	no	440	459	440	0.235
chimera_m267113/933/CCS|F;size=1_and_m72132/595/CCS|T;size=1_at_126_ITS1_reversed_no_47	m267113/933/CCS|F;size=1	m72132/595/CCS|T;size=1	126	ITS1	no	417	507	417	0.249
chimera_m298023/467/CCS|F;size=1_and_m417333/545/CCS|F;size=1_at_237_ITS2_reversed_no_48	m298023/467/CCS|F;size=1	m417333/545/CCS|F;size=1	237	ITS2	no	545	444	545	0.534
chimera_m436757/806/CCS|F;size=1_and_m208976/339/CCS|F;size=1_at_159_ITS1_reversed_yes_49	m436757/806/CCS|F;size=1	m208976/339/CCS|F;size=1	159	ITS1	yes	339	598	339	0.266
chimera_m127485/780/CCS|F;size=2_and_m13408/683/CCS|F;size=1_at_89_ITS1_reversed_no_50	m127485/780/CCS|F;size=2	m13408/683/CCS|F;size=1	89	ITS1	no	453	513	453	0.173
chimera_m229723/604/CCS|F;size=1_and_m346832/604/CCS|F;size=1_at_434_ITS2_reversed_no_51	m229723/604/CCS|F;size=1	m346832/604/CCS|F;size=1	434	ITS2	no	604	604	604	0.719
chimera_m111888/1279/CCS|F;size=2_and_m228102/1408/CCS|F;size=1_at_230_ITS2_reversed_no_52	m111888/1279/CCS|F;size=2	m228102/1408/CCS|F;size=1	230	ITS2	no	469	389	469	0.591
chimera_m17667/677/CCS|F;size=1_and_m53664/764/CCS|F;size=1_at_138_ITS1_reversed_no_53	m17667/677/CCS|F;size=1	m53664/764/CCS|F;size=1	138	ITS1	no	519	677	519	0.204
chimera_m111915/1358/CCS|T;size=1_and_m82070/571/CCS|F;size=1_at_262_ITS2_reversed_no_54	m111915/1358/CCS|T;size=1	m82070/571/CCS|F;size=1	262	ITS2	no	529	434	529	0.604
chimera_m61689/1291/CCS|F;size=1_and_m48935/1294/CCS|F;size=1_at_357_ITS2_reversed_no_55	m61689/1291/CCS|F;size=1	m48935/1294/CCS|F;size=1	357	ITS2	no	581	580	581	0.616
chimera_m429919/943/CCS|F;size=1_and_m49557/865/CCS|F;size=1_at_80_ITS1_reversed_no_56	m429919/943/CCS|F;size=1	m49557/865/CCS|F;size=1	80	ITS1	no	528	638	528	0.125
chimera_m213173/1284/CCS|F;size=1_and_m206866/1515/CCS|F;size=1_at_399_ITS2_reversed_no_57	m213173/1284/CCS|F;size=1	m206866/1515/CCS|F;size=1	399	ITS2	no	597	555	597	0.719
chimera_m35531/1215/CCS|F;size=1_and_m105551/1352/CCS|F;size=1_at_378_ITS2_reversed_no_58	m35531/1215/CCS|F;size=1	m105551/1352/CCS|F;size=1	378	ITS2	no	501	574	501	0.659
chimera_m140552/1223/CCS|F;size=1_and_m199891/861/CCS|F;size=2_at_335_ITS2_reversed_no_59	m140552/1223/CCS|F;size=1	m199891/861/CCS|F;size=2	335	ITS2	no	519	533	519	0.629
chimera_m440746/731/CCS|F;size=1_and_m46838/889/CCS|F;size=2_at_147_ITS1_reversed_yes_60	m440746/731/CCS|F;size=1	m46838/889/CCS|F;size=2	147	ITS1	yes	414	656	414	0.224
chimera_m61686/1304/CCS|F;size=1_and_m160368/1507/CCS|F;size=1_at_128_ITS1_reversed_no_61	m61686/1304/CCS|F;size=1	m160368/1507/CCS|F;size=1	128	ITS1	no	394	645	394	0.198
chimera_m349775/1371/CCS|F;size=1_and_m100009/797/CCS|F;size=1_at_88_ITS1_reversed_no_62	m349775/1371/CCS|F;size=1	m100009/797/CCS|F;size=1	88	ITS1	no	526	533	526	0.165
chimera_m32246/825/CCS|F;size=1_and_m26792/1590/CCS|F;size=1_at_414_ITS2_reversed_no_63	m32246/825/CCS|F;size=1	m26792/1590/CCS|F;size=1	414	ITS2	no	477	645	477	0.642
chimera_m38495/1537/CCS|F;size=1_and_m133673/646/CCS|F;size=1_at_295_ITS2_reversed_no_64	m38495/1537/CCS|F;size=1	m133673/646/CCS|F;size=1	295	ITS2	no	416	601	416	0.491
chimera_m114472/1316/CCS|F;size=1_and_m340280/640/CCS|F;size=1_at_32_ITS1_reversed_no_65	m114472/1316/CCS|F;size=1	m340280/640/CCS|F;size=1	32	ITS1	no	507	389	507	0.082
chimera_m131040/1438/CCS|F;size=1_and_m145715/882/CCS|F;size=1_at_167_ITS1_reversed_no_66	m131040/1438/CCS|F;size=1	m145715/882/CCS|F;size=1	167	ITS1	no	700	658	700	0.254
chimera_m230141/1377/CCS|F;size=1_and_m123721/788/CCS|F;size=1_at_147_ITS1_reversed_no_67	m230141/1377/CCS|F;size=1	m123721/788/CCS|F;size=1	147	ITS1	no	576	577	576	0.255
chimera_m25043/540/CCS|F;size=2_and_m96252/891/CCS|F;size=1_at_283_ITS2_reversed_no_68	m25043/540/CCS|F;size=2	m96252/891/CCS|F;size=1	283	ITS2	no	529	396	529	0.715
chimera_m96026/1388/CCS|F;size=1_and_m73064/1021/CCS|F;size=1_at_185_ITS1_reversed_no_69	m96026/1388/CCS|F;size=1	m73064/1021/CCS|F;size=1	185	ITS1	no	966	711	966	0.26
chimera_m174199/400/CCS|F;size=1_and_m80492/695/CCS|F;size=1_at_118_ITS1_reversed_no_70	m174199/400/CCS|F;size=1	m80492/695/CCS|F;size=1	118	ITS1	no	653	400	653	0.295
chimera_m263371/1450/CCS|F;size=1_and_m1218/664/CCS|F;size=1_at_518_ITS2_reversed_no_71	m263371/1450/CCS|F;size=1	m1218/664/CCS|F;size=1	518	ITS2	no	552	622	552	0.833
chimera_m283668/811/CCS|F;size=1_and_m401209/949/CCS|F;size=1_at_358_ITS2_reversed_no_72	m283668/811/CCS|F;size=1	m401209/949/CCS|F;size=1	358	ITS2	no	658	557	658	0.643
chimera_m79828/562/CCS|F;size=1_and_m253713/730/CCS|F;size=1_at_305_ITS2_reversed_no_73	m79828/562/CCS|F;size=1	m253713/730/CCS|F;size=1	305	ITS2	no	402	485	402	0.629
chimera_m47084/1232/CCS|F;size=1_and_m233985/692/CCS|F;size=1_at_240_5.8S_reversed_yes_74	m47084/1232/CCS|F;size=1	m233985/692/CCS|F;size=1	240	5.8S	yes	566	618	566	0.388
chimera_m143093/766/CCS|F;size=1_and_m97621/1250/CCS|F;size=1_at_415_ITS2_reversed_no_75	m143093/766/CCS|F;size=1	m97621/1250/CCS|F;size=1	415	ITS2	no	572	766	572	0.542
chimera_m199732/1591/CCS|F;size=1_and_m240572/1269/CCS|F;size=1_at_155_ITS1_reversed_no_76	m199732/1591/CCS|F;size=1	m240572/1269/CCS|F;size=1	155	ITS1	no	516	859	516	0.18
chimera_m359927/1278/CCS|F;size=1_and_m308883/880/CCS|F;size=1_at_145_ITS1_reversed_no_77	m359927/1278/CCS|F;size=1	m308883/880/CCS|F;size=1	145	ITS1	no	644	470	644	0.309
chimera_m304660/1476/CCS|F;size=1_and_m117977/849/CCS|F;size=1_at_379_ITS2_reversed_no_78	m304660/1476/CCS|F;size=1	m117977/849/CCS|F;size=1	379	ITS2	no	849	632	849	0.6
chimera_m208178/1321/CCS|F;size=1_and_m55312/1308/CCS|F;size=1_at_132_ITS1_reversed_no_79	m208178/1321/CCS|F;size=1	m55312/1308/CCS|F;size=1	132	ITS1	no	545	546	545	0.242
chimera_m248329/1374/CCS|F;size=1_and_m59900/665/CCS|F;size=1_at_138_ITS1_reversed_no_80	m248329/1374/CCS|F;size=1	m59900/665/CCS|F;size=1	138	ITS1	no	450	641	450	0.215
chimera_m24598/590/CCS|F;size=1_and_m278209/547/CCS|F;size=1_at_420_ITS2_reversed_no_81	m24598/590/CCS|F;size=1	m278209/547/CCS|F;size=1	420	ITS2	no	449	520	449	0.808
chimera_m36428/685/CCS|F;size=1_and_m134008/1480/CCS|F;size=1_at_365_ITS2_reversed_no_82	m36428/685/CCS|F;size=1	m134008/1480/CCS|F;size=1	365	ITS2	no	542	631	542	0.578
chimera_m12391/868/CCS|F;size=1_and_m33048/576/CCS|F;size=1_at_537_ITS2_reversed_no_83	m12391/868/CCS|F;size=1	m33048/576/CCS|F;size=1	537	ITS2	no	537	709	443	0.757
chimera_m165478/654/CCS|F;size=1_and_m54619/735/CCS|F;size=1_at_369_ITS2_reversed_yes_84	m165478/654/CCS|F;size=1	m54619/735/CCS|F;size=1	369	ITS2	yes	463	576	463	0.641
chimera_m104612/543/CCS|F;size=1_and_m393155/1182/CCS|F;size=1_at_250_ITS2_reversed_yes_85	m104612/543/CCS|F;size=1	m393155/1182/CCS|F;size=1	250	ITS2	yes	740	468	740	0.534
chimera_m39714/583/CCS|F;size=1_and_m356161/803/CCS|F;size=1_at_174_ITS1_reversed_no_86	m39714/583/CCS|F;size=1	m356161/803/CCS|F;size=1	174	ITS1	no	521	583	521	0.298
chimera_m224005/547/CCS|F;size=1_and_m162326/1330/CCS|F;size=1_at_83_ITS1_reversed_no_87	m224005/547/CCS|F;size=1	m162326/1330/CCS|F;size=1	83	ITS1	no	465	514	465	0.161
chimera_m56355/396/CCS|F;size=1_and_m168284/1021/CCS|F;size=1_at_248_ITS2_reversed_no_88	m56355/396/CCS|F;size=1	m168284/1021/CCS|F;size=1	248	ITS2	no	463	396	463	0.626
chimera_m9857/746/CCS|F;size=1_and_m39434/783/CCS|F;size=1_at_151_ITS1_reversed_no_89	m9857/746/CCS|F;size=1	m39434/783/CCS|F;size=1	151	ITS1	no	622	468	622	0.323
chimera_m142349/499/CCS|F;size=1_and_m153866/838/CCS|F;size=1_at_176_5.8S_reversed_no_90	m142349/499/CCS|F;size=1	m153866/838/CCS|F;size=1	176	5.8S	no	632	499	632	0.353
chimera_m230382/1502/CCS|F;size=1_and_m35314/696/CCS|F;size=1_at_244_5.8S_reversed_no_91	m230382/1502/CCS|F;size=1	m35314/696/CCS|F;size=1	244	5.8S	no	501	691	501	0.353
chimera_m344686/740/CCS|F;size=1_and_m266763/506/CCS|F;size=1_at_342_ITS2_reversed_no_92	m344686/740/CCS|F;size=1	m266763/506/CCS|F;size=1	342	ITS2	no	506	487	506	0.702
chimera_m1486/1264/CCS|F;size=81_and_m290613/609/CCS|F;size=2_at_576_ITS2_reversed_no_93	m1486/1264/CCS|F;size=81	m290613/609/CCS|F;size=2	576	ITS2	no	576	710	454	0.811
chimera_m129214/1593/CCS|F;size=1_and_m58231/458/CCS|F;size=1_at_291_ITS2_reversed_no_94	m129214/1593/CCS|F;size=1	m58231/458/CCS|F;size=1	291	ITS2	no	458	470	458	0.619
chimera_m24858/1499/CCS|F;size=2_and_m210608/926/CCS|F;size=1_at_127_ITS1_reversed_no_95	m24858/1499/CCS|F;size=2	m210608/926/CCS|F;size=1	127	ITS1	no	562	481	562	0.264
chimera_m106017/1681/CCS|F;size=1_and_m141283/546/CCS|F;size=1_at_393_ITS2_reversed_no_96	m106017/1681/CCS|F;size=1	m141283/546/CCS|F;size=1	393	ITS2	no	546	562	546	0.699
chimera_m41251/1527/CCS|F;size=1_and_m9658/1101/CCS|F;size=1_at_123_ITS1_reversed_yes_97	m41251/1527/CCS|F;size=1	m9658/1101/CCS|F;size=1	123	ITS1	yes	548	445	548	0.276
chimera_m71779/1036/CCS|F;size=1_and_m176029/841/CCS|F;size=1_at_491_ITS2_reversed_no_98	m71779/1036/CCS|F;size=1	m176029/841/CCS|F;size=1	491	ITS2	no	623	607	623	0.809
chimera_m445580/1032/CCS|T;size=1_and_m140178/2154/CCS|F;size=1_at_243_ITS2_reversed_no_99	m445580/1032/CCS|T;size=1	m140178/2154/CCS|F;size=1	243	ITS2	no	668	414	668	0.587
chimera_m231118/1342/CCS|F;size=1_and_m129505/560/CCS|F;size=1_at_15_ITS1_reversed_no_100	m231118/1342/CCS|F;size=1	m129505/560/CCS|F;size=1	15	ITS1	no	560	481	560	0.031
chimera_m134214/1099/CCS|F;size=1_and_m343333/1701/CCS|F;size=1_at_321_ITS2_reversed_no_101	m134214/1099/CCS|F;size=1	m343333/1701/CCS|F;size=1	321	ITS2	no	671	532	671	0.603
chimera_m21113/539/CCS|F;size=1_and_m51571/1126/CCS|F;size=1_at_246_ITS2_reversed_no_102	m21113/539/CCS|F;size=1	m51571/1126/CCS|F;size=1	246	ITS2	no	646	445	646	0.553
chimera_m65142/575/CCS|F;size=1_and_m101897/1094/CCS|F;size=1_at_117_ITS1_reversed_no_103	m65142/575/CCS|F;size=1	m101897/1094/CCS|F;size=1	117	ITS1	no	476	526	476	0.222
chimera_m94966/1022/CCS|F;size=1_and_m73416/1371/CCS|F;size=1_at_421_ITS2_reversed_no_104	m94966/1022/CCS|F;size=1	m73416/1371/CCS|F;size=1	421	ITS2	no	538	635	538	0.663
chimera_m46231/575/CCS|F;size=1_and_m184166/802/CCS|F;size=1_at_93_ITS1_reversed_no_105	m46231/575/CCS|F;size=1	m184166/802/CCS|F;size=1	93	ITS1	no	585	410	585	0.227
chimera_m291450/599/CCS|F;size=1_and_m192492/1316/CCS|F;size=1_at_423_ITS2_reversed_no_106	m291450/599/CCS|F;size=1	m192492/1316/CCS|F;size=1	423	ITS2	no	558	599	558	0.706
chimera_m113103/859/CCS|F;size=1_and_m215296/1350/CCS|F;size=1_at_395_ITS2_reversed_no_107	m113103/859/CCS|F;size=1	m215296/1350/CCS|F;size=1	395	ITS2	no	574	663	574	0.596
chimera_m114751/1479/CCS|F;size=1_and_m178101/1455/CCS|F;size=2_at_219_ITS2_reversed_no_108	m114751/1479/CCS|F;size=1	m178101/1455/CCS|F;size=2	219	ITS2	no	404	378	404	0.579
chimera_m200837/813/CCS|F;size=1_and_m371024/632/CCS|F;size=1_at_316_ITS2_reversed_no_109	m200837/813/CCS|F;size=1	m371024/632/CCS|F;size=1	316	ITS2	no	501	475	501	0.665
chimera_m109943/1291/CCS|F;size=1_and_m80206/1737/CCS|F;size=1_at_298_5.8S_reversed_no_110	m109943/1291/CCS|F;size=1	m80206/1737/CCS|F;size=1	298	5.8S	no	564	621	564	0.48
chimera_m187302/723/CCS|F;size=1_and_m174590/1019/CCS|F;size=1_at_364_ITS2_reversed_no_111	m187302/723/CCS|F;size=1	m174590/1019/CCS|F;size=1	364	ITS2	no	526	618	526	0.589
chimera_m171261/1460/CCS|F;size=1_and_m282695/1577/CCS|F;size=1_at_370_ITS2_reversed_no_112	m171261/1460/CCS|F;size=1	m282695/1577/CCS|F;size=1	370	ITS2	no	445	606	445	0.611
chimera_m271760/1432/CCS|F;size=1_and_m107304/1075/CCS|F;size=1_at_401_ITS2_reversed_no_113	m271760/1432/CCS|F;size=1	m107304/1075/CCS|F;size=1	401	ITS2	no	711	542	711	0.74
chimera_m227923/1992/CCS|F;size=1_and_m22461/909/CCS|F;size=1_at_418_ITS2_reversed_no_114	m227923/1992/CCS|F;size=1	m22461/909/CCS|F;size=1	418	ITS2	no	628	565	628	0.74
chimera_m283890/1155/CCS|F;size=1_and_m99849/751/CCS|F;size=1_at_470_ITS2_reversed_no_115	m283890/1155/CCS|F;size=1	m99849/751/CCS|F;size=1	470	ITS2	no	470	631	466	0.745
chimera_m265818/1082/CCS|F;size=1_and_m230108/1378/CCS|F;size=1_at_27_ITS1_reversed_no_116	m265818/1082/CCS|F;size=1	m230108/1378/CCS|F;size=1	27	ITS1	no	511	556	511	0.049
chimera_m12107/1166/CCS|F;size=1_and_m85194/1303/CCS|F;size=2_at_430_ITS2_reversed_no_117	m12107/1166/CCS|F;size=1	m85194/1303/CCS|F;size=2	430	ITS2	no	446	474	446	0.907
chimera_m218984/1597/CCS|F;size=1_and_m178235/524/CCS|F;size=1_at_426_ITS2_reversed_no_118	m218984/1597/CCS|F;size=1	m178235/524/CCS|F;size=1	426	ITS2	no	437	520	437	0.819
chimera_m67719/609/CCS|F;size=1_and_m59255/693/CCS|F;size=1_at_104_ITS1_reversed_no_119	m67719/609/CCS|F;size=1	m59255/693/CCS|F;size=1	104	ITS1	no	400	496	400	0.21
chimera_m55665/1104/CCS|F;size=2_and_m12786/610/CCS|F;size=1_at_315_ITS2_reversed_no_120	m55665/1104/CCS|F;size=2	m12786/610/CCS|F;size=1	315	ITS2	no	537	472	537	0.667
chimera_m125970/858/CCS|F;size=2_and_m38899/696/CCS|F;size=1_at_369_ITS2_reversed_no_121	m125970/858/CCS|F;size=2	m38899/696/CCS|F;size=1	369	ITS2	no	535	530	535	0.696
chimera_m3746/1194/CCS|F;size=1_and_m328221/1228/CCS|F;size=1_at_261_ITS2_reversed_no_122	m3746/1194/CCS|F;size=1	m328221/1228/CCS|F;size=1	261	ITS2	no	463	517	463	0.505
chimera_m192838/1267/CCS|F;size=1_and_m140970/909/CCS|F;size=1_at_315_ITS2_reversed_no_123	m192838/1267/CCS|F;size=1	m140970/909/CCS|F;size=1	315	ITS2	no	423	475	423	0.663
chimera_m201778/467/CCS|F;size=2_and_m7928/486/CCS|F;size=1_at_268_ITS2_reversed_no_124	m201778/467/CCS|F;size=2	m7928/486/CCS|F;size=1	268	ITS2	no	486	417	486	0.643
chimera_m305987/911/CCS|F;size=1_and_m123551/845/CCS|F;size=2_at_253_ITS2_reversed_no_125	m305987/911/CCS|F;size=1	m123551/845/CCS|F;size=2	253	ITS2	no	481	417	481	0.607
chimera_m181344/827/CCS|F;size=1_and_m189929/1129/CCS|T;size=1_at_146_ITS1_reversed_no_126	m181344/827/CCS|F;size=1	m189929/1129/CCS|T;size=1	146	ITS1	no	474	573	474	0.255
chimera_m7666/625/CCS|F;size=1_and_m299165/783/CCS|F;size=1_at_324_ITS2_reversed_no_127	m7666/625/CCS|F;size=1	m299165/783/CCS|F;size=1	324	ITS2	no	557	521	557	0.622
chimera_m195380/908/CCS|F;size=1_and_m148418/807/CCS|F;size=1_at_317_ITS2_reversed_no_128	m195380/908/CCS|F;size=1	m148418/807/CCS|F;size=1	317	ITS2	no	581	457	581	0.694
chimera_m24011/904/CCS|F;size=1_and_m209472/1264/CCS|F;size=1_at_270_ITS2_reversed_no_129	m24011/904/CCS|F;size=1	m209472/1264/CCS|F;size=1	270	ITS2	no	511	493	511	0.548
chimera_m295973/875/CCS|F;size=1_and_m192283/1236/CCS|F;size=1_at_152_ITS1_reversed_no_130	m295973/875/CCS|F;size=1	m192283/1236/CCS|F;size=1	152	ITS1	no	612	523	612	0.291
chimera_m89623/684/CCS|F;size=1_and_m110356/551/CCS|F;size=1_at_286_ITS2_reversed_no_131	m89623/684/CCS|F;size=1	m110356/551/CCS|F;size=1	286	ITS2	no	502	512	502	0.559
chimera_m56903/1182/CCS|F;size=1_and_m291133/487/CCS|F;size=1_at_283_5.8S_reversed_no_132	m56903/1182/CCS|F;size=1	m291133/487/CCS|F;size=1	283	5.8S	no	487	712	487	0.397
chimera_m93362/1332/CCS|F;size=1_and_m178783/1714/CCS|F;size=1_at_401_ITS2_reversed_no_133	m93362/1332/CCS|F;size=1	m178783/1714/CCS|F;size=1	401	ITS2	no	506	486	506	0.825
chimera_m200902/1507/CCS|F;size=1_and_m194274/634/CCS|F;size=1_at_170_ITS1_reversed_no_134	m200902/1507/CCS|F;size=1	m194274/634/CCS|F;size=1	170	ITS1	no	426	573	426	0.297
chimera_m163328/565/CCS|F;size=1_and_m171679/744/CCS|F;size=1_at_94_ITS1_reversed_yes_135	m163328/565/CCS|F;size=1	m171679/744/CCS|F;size=1	94	ITS1	yes	630	492	630	0.191
chimera_m267727/456/CCS|F;size=1_and_m132540/631/CCS|F;size=1_at_252_ITS2_reversed_no_136	m267727/456/CCS|F;size=1	m132540/631/CCS|F;size=1	252	ITS2	no	579	456	579	0.553
chimera_m80882/1956/CCS|F;size=1_and_m98141/585/CCS|F;size=1_at_447_ITS2_reversed_no_137	m80882/1956/CCS|F;size=1	m98141/585/CCS|F;size=1	447	ITS2	no	515	672	515	0.665
chimera_m171451/842/CCS|F;size=1_and_m420456/456/CCS|F;size=1_at_113_ITS1_reversed_no_138	m171451/842/CCS|F;size=1	m420456/456/CCS|F;size=1	113	ITS1	no	456	561	456	0.201
chimera_m80965/1174/CCS|F;size=1_and_m342524/1376/CCS|F;size=1_at_101_ITS1_reversed_no_139	m80965/1174/CCS|F;size=1	m342524/1376/CCS|F;size=1	101	ITS1	no	622	392	622	0.258
chimera_m217316/893/CCS|F;size=1_and_m65424/586/CCS|F;size=1_at_104_ITS1_reversed_no_140	m217316/893/CCS|F;size=1	m65424/586/CCS|F;size=1	104	ITS1	no	488	632	488	0.165
chimera_m275555/1319/CCS|F;size=1_and_m231114/1624/CCS|F;size=1_at_184_ITS1_reversed_no_141	m275555/1319/CCS|F;size=1	m231114/1624/CCS|F;size=1	184	ITS1	no	641	546	641	0.337
chimera_m149524/459/CCS|F;size=1_and_m216687/597/CCS|F;size=1_at_205_5.8S_reversed_no_142	m149524/459/CCS|F;size=1	m216687/597/CCS|F;size=1	205	5.8S	no	506	459	506	0.447
chimera_m110086/523/CCS|F;size=2_and_m34347/418/CCS|F;size=1_at_50_ITS1_reversed_no_143	m110086/523/CCS|F;size=2	m34347/418/CCS|F;size=1	50	ITS1	no	418	422	418	0.118
chimera_m199486/882/CCS|F;size=1_and_m242013/1264/CCS|F;size=1_at_99_ITS1_reversed_no_144	m199486/882/CCS|F;size=1	m242013/1264/CCS|F;size=1	99	ITS1	no	641	468	641	0.212
chimera_m21852/884/CCS|F;size=2_and_m17340/1000/CCS|F;size=1_at_391_ITS2_reversed_yes_145	m21852/884/CCS|F;size=2	m17340/1000/CCS|F;size=1	391	ITS2	yes	562	447	562	0.875
chimera_m410363/1406/CCS|F;size=1_and_m174726/1242/CCS|F;size=1_at_378_ITS2_reversed_no_146	m410363/1406/CCS|F;size=1	m174726/1242/CCS|F;size=1	378	ITS2	no	517	557	517	0.679
chimera_m71643/1303/CCS|F;size=1_and_m53507/1450/CCS|F;size=1_at_138_ITS1_reversed_no_147	m71643/1303/CCS|F;size=1	m53507/1450/CCS|F;size=1	138	ITS1	no	521	618	521	0.223
chimera_m26186/378/CCS|F;size=1_and_m291797/1128/CCS|F;size=1_at_219_ITS2_reversed_no_148	m26186/378/CCS|F;size=1	m291797/1128/CCS|F;size=1	219	ITS2	no	558	378	558	0.579
chimera_m212374/1417/CCS|F;size=1_and_m10611/1335/CCS|F;size=1_at_406_ITS2_reversed_no_149	m212374/1417/CCS|F;size=1	m10611/1335/CCS|F;size=1	406	ITS2	no	443	590	443	0.688
chimera_m77527/1144/CCS|F;size=1_and_m61101/690/CCS|F;size=1_at_277_5.8S_reversed_no_150	m77527/1144/CCS|F;size=1	m61101/690/CCS|F;size=1	277	5.8S	no	488	597	488	0.464
chimera_m142070/589/CCS|F;size=1_and_m309352/503/CCS|F;size=1_at_132_ITS1_reversed_no_151	m142070/589/CCS|F;size=1	m309352/503/CCS|F;size=1	132	ITS1	no	472	505	472	0.261
chimera_m88393/1418/CCS|F;size=2_and_m181713/1430/CCS|F;size=1_at_300_ITS2_reversed_no_152	m88393/1418/CCS|F;size=2	m181713/1430/CCS|F;size=1	300	ITS2	no	668	509	668	0.589
chimera_m96683/656/CCS|F;size=1_and_m245887/1774/CCS|F;size=1_at_317_ITS2_reversed_no_153	m96683/656/CCS|F;size=1	m245887/1774/CCS|F;size=1	317	ITS2	no	738	484	738	0.655
chimera_m88708/1084/CCS|F;size=1_and_m131350/1134/CCS|F;size=1_at_93_ITS1_reversed_no_154	m88708/1084/CCS|F;size=1	m131350/1134/CCS|F;size=1	93	ITS1	no	460	441	460	0.211
chimera_m189014/746/CCS|F;size=1_and_m290394/835/CCS|F;size=1_at_236_ITS2_reversed_no_155	m189014/746/CCS|F;size=1	m290394/835/CCS|F;size=1	236	ITS2	no	581	468	581	0.504
chimera_m74403/612/CCS|F;size=1_and_m71234/702/CCS|F;size=1_at_193_5.8S_reversed_no_156	m74403/612/CCS|F;size=1	m71234/702/CCS|F;size=1	193	5.8S	no	537	449	537	0.43
chimera_m56554/915/CCS|F;size=1_and_m338578/887/CCS|F;size=1_at_243_ITS2_reversed_no_157	m56554/915/CCS|F;size=1	m338578/887/CCS|F;size=1	243	ITS2	no	664	462	664	0.526
chimera_m26203/738/CCS|F;size=1_and_m259538/762/CCS|F;size=1_at_166_ITS1_reversed_no_158	m26203/738/CCS|F;size=1	m259538/762/CCS|F;size=1	166	ITS1	no	535	552	535	0.301
chimera_m144392/793/CCS|F;size=1_and_m222834/1340/CCS|F;size=1_at_155_ITS1_reversed_no_159	m144392/793/CCS|F;size=1	m222834/1340/CCS|F;size=1	155	ITS1	no	593	484	593	0.32
chimera_m185847/903/CCS|F;size=1_and_m238577/760/CCS|F;size=1_at_354_ITS2_reversed_yes_160	m185847/903/CCS|F;size=1	m238577/760/CCS|F;size=1	354	ITS2	yes	461	505	461	0.701
chimera_m159694/814/CCS|F;size=1_and_m123579/905/CCS|F;size=1_at_176_5.8S_reversed_no_161	m159694/814/CCS|F;size=1	m123579/905/CCS|F;size=1	176	5.8S	no	419	502	419	0.351
chimera_m9447/682/CCS|F;size=1_and_m3016/421/CCS|F;size=1_at_389_ITS2_reversed_no_162	m9447/682/CCS|F;size=1	m3016/421/CCS|F;size=1	389	ITS2	no	421	583	421	0.667
chimera_m53107/1215/CCS|F;size=1_and_m87589/654/CCS|F;size=1_at_301_ITS2_reversed_no_163	m53107/1215/CCS|F;size=1	m87589/654/CCS|F;size=1	301	ITS2	no	654	538	654	0.559
chimera_m228938/425/CCS|F;size=1_and_m145684/1049/CCS|F;size=1_at_348_ITS2_reversed_no_164	m228938/425/CCS|F;size=1	m145684/1049/CCS|F;size=1	348	ITS2	no	478	425	478	0.819
chimera_m28913/2104/CCS|F;size=1_and_m67538/1020/CCS|F;size=2_at_207_5.8S_reversed_no_165	m28913/2104/CCS|F;size=1	m67538/1020/CCS|F;size=2	207	5.8S	no	453	543	453	0.381
chimera_m371288/410/CCS|F;size=1_and_m454997/1599/CCS|F;size=1_at_324_ITS2_reversed_no_166	m371288/410/CCS|F;size=1	m454997/1599/CCS|F;size=1	324	ITS2	no	495	410	495	0.79
chimera_m366178/1680/CCS|F;size=1_and_m178833/896/CCS|F;size=1_at_44_ITS1_reversed_no_167	m366178/1680/CCS|F;size=1	m178833/896/CCS|F;size=1	44	ITS1	no	627	567	627	0.078
chimera_m140449/1058/CCS|F;size=1_and_m29954/1123/CCS|F;size=1_at_153_ITS1_reversed_no_168	m140449/1058/CCS|F;size=1	m29954/1123/CCS|F;size=1	153	ITS1	no	582	506	582	0.302
chimera_m125671/487/CCS|F;size=1_and_m349792/1255/CCS|F;size=1_at_99_ITS1_reversed_no_169	m125671/487/CCS|F;size=1	m349792/1255/CCS|F;size=1	99	ITS1	no	727	487	727	0.203
chimera_m405886/678/CCS|F;size=1_and_m5785/1444/CCS|F;size=1_at_158_5.8S_reversed_no_170	m405886/678/CCS|F;size=1	m5785/1444/CCS|F;size=1	158	5.8S	no	416	443	416	0.357
chimera_m6223/964/CCS|F;size=56_and_m218085/1677/CCS|F;size=1_at_119_ITS1_reversed_no_171	m6223/964/CCS|F;size=56	m218085/1677/CCS|F;size=1	119	ITS1	no	514	573	514	0.208
chimera_m240230/1008/CCS|F;size=1_and_m419930/890/CCS|F;size=1_at_84_ITS1_reversed_no_172	m240230/1008/CCS|F;size=1	m419930/890/CCS|F;size=1	84	ITS1	no	702	460	702	0.183
chimera_m250638/1184/CCS|F;size=1_and_m33805/588/CCS|F;size=1_at_152_ITS1_reversed_no_173	m250638/1184/CCS|F;size=1	m33805/588/CCS|F;size=1	152	ITS1	no	514	536	514	0.284
chimera_m17086/1426/CCS|F;size=1_and_m210546/883/CCS|F;size=1_at_525_ITS2_reversed_no_174	m17086/1426/CCS|F;size=1	m210546/883/CCS|F;size=1	525	ITS2	no	525	720	433	0.729
chimera_m62806/1509/CCS|F;size=1_and_m228573/911/CCS|F;size=1_at_1_ITS1_reversed_no_175	m62806/1509/CCS|F;size=1	m228573/911/CCS|F;size=1	1	ITS1	no	585	494	585	0.002
chimera_m25054/1010/CCS|F;size=1_and_m55228/967/CCS|F;size=1_at_582_ITS2_reversed_no_176	m25054/1010/CCS|F;size=1	m55228/967/CCS|F;size=1	582	ITS2	no	582	736	454	0.791
chimera_m96952/790/CCS|F;size=3_and_m30623/343/CCS|F;size=1_at_351_ITS2_reversed_no_177	m96952/790/CCS|F;size=3	m30623/343/CCS|F;size=1	351	ITS2	no	351	500	343	0.702
chimera_m49085/576/CCS|F;size=2_and_m21293/999/CCS|F;size=1_at_309_ITS2_reversed_no_178	m49085/576/CCS|F;size=2	m21293/999/CCS|F;size=1	309	ITS2	no	601	436	601	0.709
chimera_m231688/962/CCS|F;size=1_and_m231667/1724/CCS|F;size=1_at_344_ITS2_reversed_no_179	m231688/962/CCS|F;size=1	m231667/1724/CCS|F;size=1	344	ITS2	no	506	635	506	0.542
chimera_m252285/1169/CCS|F;size=1_and_m260269/911/CCS|F;size=1_at_338_ITS2_reversed_no_180	m252285/1169/CCS|F;size=1	m260269/911/CCS|F;size=1	338	ITS2	no	475	510	475	0.663
chimera_m196632/864/CCS|F;size=1_and_m93192/954/CCS|F;size=1_at_182_ITS1_reversed_no_181	m196632/864/CCS|F;size=1	m93192/954/CCS|F;size=1	182	ITS1	no	574	559	574	0.326
chimera_m121451/987/CCS|F;size=1_and_m186439/762/CCS|F;size=1_at_193_ITS1_reversed_no_182	m121451/987/CCS|F;size=1	m186439/762/CCS|F;size=1	193	ITS1	no	448	566	448	0.341
chimera_m337106/914/CCS|F;size=1_and_m188078/1015/CCS|F;size=1_at_138_ITS1_reversed_no_183	m337106/914/CCS|F;size=1	m188078/1015/CCS|F;size=1	138	ITS1	no	618	539	618	0.256
chimera_m334241/563/CCS|F;size=1_and_m297701/629/CCS|F;size=1_at_367_ITS2_reversed_no_184	m334241/563/CCS|F;size=1	m297701/629/CCS|F;size=1	367	ITS2	no	509	485	509	0.757
chimera_m283435/974/CCS|F;size=1_and_m376947/1240/CCS|F;size=1_at_52_ITS1_reversed_no_185	m283435/974/CCS|F;size=1	m376947/1240/CCS|F;size=1	52	ITS1	no	590	522	590	0.1
chimera_m161858/1364/CCS|F;size=1_and_m285683/1243/CCS|F;size=1_at_351_ITS2_reversed_no_186	m161858/1364/CCS|F;size=1	m285683/1243/CCS|F;size=1	351	ITS2	no	603	561	603	0.626
chimera_m5175/463/CCS|F;size=1_and_m220655/896/CCS|F;size=1_at_310_ITS2_reversed_no_187	m5175/463/CCS|F;size=1	m220655/896/CCS|F;size=1	310	ITS2	no	668	463	668	0.67
chimera_m185413/757/CCS|F;size=1_and_m90666/350/CCS|F;size=1_at_355_ITS2_reversed_no_188	m185413/757/CCS|F;size=1	m90666/350/CCS|F;size=1	355	ITS2	no	355	576	350	0.616
chimera_m67641/592/CCS|F;size=1_and_m372270/437/CCS|F;size=1_at_174_5.8S_reversed_no_189	m67641/592/CCS|F;size=1	m372270/437/CCS|F;size=1	174	5.8S	no	437	431	437	0.404
chimera_m274353/1447/CCS|F;size=1_and_m29369/1249/CCS|F;size=1_at_318_ITS2_reversed_no_190	m274353/1447/CCS|F;size=1	m29369/1249/CCS|F;size=1	318	ITS2	no	478	464	478	0.685
chimera_m141687/711/CCS|F;size=1_and_m57739/1570/CCS|F;size=1_at_85_ITS1_reversed_no_191	m141687/711/CCS|F;size=1	m57739/1570/CCS|F;size=1	85	ITS1	no	537	440	537	0.193
chimera_m134774/1834/CCS|F;size=1_and_m198018/1158/CCS|F;size=1_at_75_ITS1_reversed_yes_192	m134774/1834/CCS|F;size=1	m198018/1158/CCS|F;size=1	75	ITS1	yes	440	518	440	0.145
chimera_m224901/954/CCS|F;size=1_and_m320677/970/CCS|F;size=1_at_361_ITS2_reversed_no_193	m224901/954/CCS|F;size=1	m320677/970/CCS|F;size=1	361	ITS2	no	970	596	970	0.606
chimera_m117083/606/CCS|F;size=1_and_m227708/717/CCS|F;size=1_at_114_ITS1_reversed_no_194	m117083/606/CCS|F;size=1	m227708/717/CCS|F;size=1	114	ITS1	no	504	457	504	0.249
chimera_m156806/625/CCS|F;size=1_and_m352757/1173/CCS|F;size=1_at_87_ITS1_reversed_no_195	m156806/625/CCS|F;size=1	m352757/1173/CCS|F;size=1	87	ITS1	no	666	446	666	0.195
chimera_m190019/1237/CCS|F;size=1_and_m104612/543/CCS|F;size=1_at_62_ITS1_reversed_no_196	m190019/1237/CCS|F;size=1	m104612/543/CCS|F;size=1	62	ITS1	no	468	495	468	0.125
chimera_m16593/380/CCS|F;size=1_and_m54754/1376/CCS|F;size=1_at_69_ITS1_reversed_no_197	m16593/380/CCS|F;size=1	m54754/1376/CCS|F;size=1	69	ITS1	no	471	380	471	0.182
chimera_m200290/1995/CCS|F;size=1_and_m367145/670/CCS|F;size=1_at_344_ITS2_reversed_yes_198	m200290/1995/CCS|F;size=1	m367145/670/CCS|F;size=1	344	ITS2	yes	670	491	670	0.701
chimera_m227798/691/CCS|F;size=1_and_m75008/1106/CCS|F;size=1_at_279_ITS2_reversed_no_199	m227798/691/CCS|F;size=1	m75008/1106/CCS|F;size=1	279	ITS2	no	464	570	464	0.489
chimera_m114179/841/CCS|F;size=1_and_m250182/1364/CCS|F;size=1_at_207_ITS1_reversed_no_200	m114179/841/CCS|F;size=1	m250182/1364/CCS|F;size=1	207	ITS1	no	511	617	511	0.335
chimera_m115940/826/CCS|F;size=1_and_m109598/704/CCS|F;size=1_at_302_ITS2_reversed_no_201	m115940/826/CCS|F;size=1	m109598/704/CCS|F;size=1	302	ITS2	no	506	412	506	0.733
chimera_m350665/974/CCS|F;size=1_and_m226539/469/CCS|F;size=1_at_196_ITS1_reversed_no_202	m350665/974/CCS|F;size=1	m226539/469/CCS|F;size=1	196	ITS1	no	469	592	469	0.331
chimera_m98127/599/CCS|F;size=1_and_m370541/419/CCS|T;size=1_at_126_ITS1_reversed_no_203	m98127/599/CCS|F;size=1	m370541/419/CCS|T;size=1	126	ITS1	no	419	498	419	0.253
chimera_m143744/526/CCS|F;size=1_and_m91787/1429/CCS|F;size=1_at_84_ITS1_reversed_no_204	m143744/526/CCS|F;size=1	m91787/1429/CCS|F;size=1	84	ITS1	no	555	375	555	0.224
chimera_m168103/603/CCS|F;size=1_and_m57232/489/CCS|F;size=1_at_317_ITS2_reversed_no_205	m168103/603/CCS|F;size=1	m57232/489/CCS|F;size=1	317	ITS2	no	489	543	489	0.584
chimera_m182439/1267/CCS|F;size=1_and_m42232/1436/CCS|F;size=1_at_271_ITS2_reversed_no_206	m182439/1267/CCS|F;size=1	m42232/1436/CCS|F;size=1	271	ITS2	no	437	467	437	0.58
chimera_m25528/1202/CCS|F;size=1_and_m47019/1207/CCS|F;size=1_at_327_ITS2_reversed_no_207	m25528/1202/CCS|F;size=1	m47019/1207/CCS|F;size=1	327	ITS2	no	452	562	452	0.582
chimera_m216793/539/CCS|F;size=1_and_m29832/984/CCS|F;size=2_at_87_ITS1_reversed_no_208	m216793/539/CCS|F;size=1	m29832/984/CCS|F;size=2	87	ITS1	no	544	539	544	0.161
chimera_m112104/1150/CCS|F;size=1_and_m162605/946/CCS|F;size=1_at_327_ITS2_reversed_no_209	m112104/1150/CCS|F;size=1	m162605/946/CCS|F;size=1	327	ITS2	no	553	475	553	0.688
chimera_m4351/1147/CCS|F;size=119_and_m60483/501/CCS|F;size=1_at_418_ITS2_reversed_no_210	m4351/1147/CCS|F;size=119	m60483/501/CCS|F;size=1	418	ITS2	no	445	598	445	0.699
chimera_m376051/1274/CCS|T;size=1_and_m11570/369/CCS|F;size=1_at_79_ITS1_reversed_no_211	m376051/1274/CCS|T;size=1	m11570/369/CCS|F;size=1	79	ITS1	no	369	382	369	0.207
chimera_m133131/973/CCS|F;size=2_and_m252215/1819/CCS|F;size=1_at_561_ITS2_reversed_no_212	m133131/973/CCS|F;size=2	m252215/1819/CCS|F;size=1	561	ITS2	no	590	611	590	0.918
chimera_m240673/827/CCS|F;size=1_and_m332439/545/CCS|F;size=1_at_156_ITS1_reversed_no_213	m240673/827/CCS|F;size=1	m332439/545/CCS|F;size=1	156	ITS1	no	545	632	545	0.247
chimera_m230995/1529/CCS|F;size=2_and_m36662/1896/CCS|F;size=1_at_109_ITS1_reversed_no_214	m230995/1529/CCS|F;size=2	m36662/1896/CCS|F;size=1	109	ITS1	no	680	585	680	0.186
chimera_m37411/692/CCS|F;size=1_and_m171083/491/CCS|T;size=2_at_305_ITS2_reversed_no_215	m37411/692/CCS|F;size=1	m171083/491/CCS|T;size=2	305	ITS2	no	393	517	393	0.59
chimera_m220498/1124/CCS|F;size=1_and_m135793/1071/CCS|F;size=1_at_161_ITS1_reversed_no_216	m220498/1124/CCS|F;size=1	m135793/1071/CCS|F;size=1	161	ITS1	no	478	655	478	0.246
chimera_m240542/965/CCS|F;size=1_and_m90702/533/CCS|F;size=1_at_354_ITS2_reversed_no_217	m240542/965/CCS|F;size=1	m90702/533/CCS|F;size=1	354	ITS2	no	465	631	465	0.561
chimera_m215415/1499/CCS|F;size=1_and_m64481/983/CCS|F;size=1_at_247_ITS2_reversed_yes_218	m215415/1499/CCS|F;size=1	m64481/983/CCS|F;size=1	247	ITS2	yes	484	467	484	0.529
chimera_m84849/1015/CCS|F;size=1_and_m51965/622/CCS|F;size=1_at_330_ITS2_reversed_yes_219	m84849/1015/CCS|F;size=1	m51965/622/CCS|F;size=1	330	ITS2	yes	578	520	578	0.635
chimera_m16628/715/CCS|F;size=1_and_m136189/835/CCS|F;size=1_at_60_ITS1_reversed_yes_220	m16628/715/CCS|F;size=1	m136189/835/CCS|F;size=1	60	ITS1	yes	472	419	472	0.143
chimera_m142975/630/CCS|F;size=1_and_m132502/829/CCS|F;size=1_at_102_ITS1_reversed_no_221	m142975/630/CCS|F;size=1	m132502/829/CCS|F;size=1	102	ITS1	no	538	534	538	0.191
chimera_m262762/1352/CCS|F;size=1_and_m155577/1408/CCS|F;size=1_at_113_ITS1_reversed_no_222	m262762/1352/CCS|F;size=1	m155577/1408/CCS|F;size=1	113	ITS1	no	624	485	624	0.233
chimera_m33341/467/CCS|F;size=2_and_m73416/1371/CCS|F;size=1_at_22_ITS1_reversed_no_223	m33341/467/CCS|F;size=2	m73416/1371/CCS|F;size=1	22	ITS1	no	538	441	538	0.05
chimera_m42358/869/CCS|F;size=1_and_m188602/737/CCS|F;size=1_at_321_ITS2_reversed_no_224	m42358/869/CCS|F;size=1	m188602/737/CCS|F;size=1	321	ITS2	no	524	546	524	0.588
chimera_m302885/462/CCS|F;size=1_and_m76924/412/CCS|F;size=1_at_113_ITS1_reversed_no_225	m302885/462/CCS|F;size=1	m76924/412/CCS|F;size=1	113	ITS1	no	412	462	412	0.245
chimera_m164915/692/CCS|F;size=1_and_m42573/1184/CCS|F;size=1_at_44_ITS1_reversed_no_226	m164915/692/CCS|F;size=1	m42573/1184/CCS|F;size=1	44	ITS1	no	553	442	553	0.1
chimera_m167490/1000/CCS|F;size=1_and_m154390/1163/CCS|F;size=1_at_116_ITS1_reversed_no_227	m167490/1000/CCS|F;size=1	m154390/1163/CCS|F;size=1	116	ITS1	no	465	706	465	0.164
chimera_m273559/977/CCS|F;size=1_and_m117499/896/CCS|F;size=1_at_357_ITS2_reversed_yes_228	m273559/977/CCS|F;size=1	m117499/896/CCS|F;size=1	357	ITS2	yes	531	543	531	0.657
chimera_m52555/1264/CCS|F;size=1_and_m182781/633/CCS|F;size=1_at_337_ITS2_reversed_no_229	m52555/1264/CCS|F;size=1	m182781/633/CCS|F;size=1	337	ITS2	no	633	414	633	0.814
chimera_m101182/699/CCS|F;size=1_and_m297812/364/CCS|F;size=1_at_376_ITS2_reversed_no_230	m101182/699/CCS|F;size=1	m297812/364/CCS|F;size=1	376	ITS2	no	376	541	364	0.695
chimera_m109178/1450/CCS|F;size=1_and_m217955/1237/CCS|F;size=1_at_427_ITS2_reversed_no_231	m109178/1450/CCS|F;size=1	m217955/1237/CCS|F;size=1	427	ITS2	no	565	670	565	0.637
chimera_m167375/1817/CCS|F;size=1_and_m119897/501/CCS|F;size=1_at_201_ITS1_reversed_no_232	m167375/1817/CCS|F;size=1	m119897/501/CCS|F;size=1	201	ITS1	no	436	682	436	0.295
chimera_m154660/672/CCS|F;size=1_and_m108699/1082/CCS|F;size=1_at_126_ITS1_reversed_no_233	m154660/672/CCS|F;size=1	m108699/1082/CCS|F;size=1	126	ITS1	no	566	412	566	0.306
chimera_m149097/632/CCS|F;size=1_and_m26079/1082/CCS|F;size=1_at_427_ITS2_reversed_no_234	m149097/632/CCS|F;size=1	m26079/1082/CCS|F;size=1	427	ITS2	no	476	505	476	0.846
chimera_m145456/1696/CCS|F;size=1_and_m34485/945/CCS|F;size=1_at_393_ITS2_reversed_no_235	m145456/1696/CCS|F;size=1	m34485/945/CCS|F;size=1	393	ITS2	no	612	550	612	0.715
chimera_m279416/736/CCS|F;size=1_and_m131867/1600/CCS|F;size=1_at_46_ITS1_reversed_no_236	m279416/736/CCS|F;size=1	m131867/1600/CCS|F;size=1	46	ITS1	no	556	411	556	0.112
chimera_m77839/545/CCS|F;size=1_and_m188695/517/CCS|F;size=1_at_349_ITS2_reversed_no_237	m77839/545/CCS|F;size=1	m188695/517/CCS|F;size=1	349	ITS2	no	517	434	517	0.804
chimera_m102535/1850/CCS|F;size=1_and_m67795/1102/CCS|F;size=1_at_366_ITS2_reversed_no_238	m102535/1850/CCS|F;size=1	m67795/1102/CCS|F;size=1	366	ITS2	no	443	566	443	0.647
chimera_m171443/1163/CCS|F;size=1_and_m263680/1234/CCS|F;size=1_at_306_ITS2_reversed_no_239	m171443/1163/CCS|F;size=1	m263680/1234/CCS|F;size=1	306	ITS2	no	638	495	638	0.618
chimera_m96017/796/CCS|F;size=1_and_m392901/1200/CCS|F;size=1_at_303_ITS2_reversed_no_240	m96017/796/CCS|F;size=1	m392901/1200/CCS|F;size=1	303	ITS2	no	787	524	787	0.578
chimera_m143166/652/CCS|F;size=1_and_m71678/413/CCS|F;size=1_at_309_ITS2_reversed_no_241	m143166/652/CCS|F;size=1	m71678/413/CCS|F;size=1	309	ITS2	no	413	502	413	0.616
chimera_m240619/882/CCS|F;size=1_and_m3082/2004/CCS|F;size=1_at_141_ITS1_reversed_no_242	m240619/882/CCS|F;size=1	m3082/2004/CCS|F;size=1	141	ITS1	no	510	459	510	0.307
chimera_m73276/1051/CCS|F;size=1_and_m222534/860/CCS|F;size=1_at_164_ITS1_reversed_no_243	m73276/1051/CCS|F;size=1	m222534/860/CCS|F;size=1	164	ITS1	no	724	752	724	0.218
chimera_m45644/1030/CCS|F;size=1_and_m303947/611/CCS|F;size=1_at_334_ITS2_reversed_no_244	m45644/1030/CCS|F;size=1	m303947/611/CCS|F;size=1	334	ITS2	no	611	484	611	0.69
chimera_m2735/662/CCS|F;size=1_and_m294118/583/CCS|F;size=1_at_357_ITS2_reversed_no_245	m2735/662/CCS|F;size=1	m294118/583/CCS|F;size=1	357	ITS2	no	497	453	497	0.788
chimera_m90768/608/CCS|F;size=2_and_m479511/465/CCS|F;size=1_at_138_ITS1_reversed_yes_246	m90768/608/CCS|F;size=2	m479511/465/CCS|F;size=1	138	ITS1	yes	465	457	465	0.302
chimera_m265600/860/CCS|F;size=1_and_m236872/1222/CCS|F;size=1_at_320_ITS2_reversed_no_247	m265600/860/CCS|F;size=1	m236872/1222/CCS|F;size=1	320	ITS2	no	648	510	648	0.627
chimera_m168330/1293/CCS|F;size=1_and_m440978/687/CCS|F;size=1_at_393_ITS2_reversed_no_248	m168330/1293/CCS|F;size=1	m440978/687/CCS|F;size=1	393	ITS2	no	552	676	552	0.581
chimera_m398466/484/CCS|F;size=1_and_m27979/636/CCS|F;size=2_at_333_ITS2_reversed_no_249	m398466/484/CCS|F;size=1	m27979/636/CCS|F;size=2	333	ITS2	no	419	484	419	0.688
chimera_m191529/785/CCS|F;size=1_and_m104316/909/CCS|F;size=1_at_362_ITS2_reversed_yes_250	m191529/785/CCS|F;size=1	m104316/909/CCS|F;size=1	362	ITS2	yes	512	471	512	0.769
chimera_m347580/1424/CCS|F;size=1_and_m379363/1490/CCS|F;size=1_at_445_ITS2_reversed_no_251	m347580/1424/CCS|F;size=1	m379363/1490/CCS|F;size=1	445	ITS2	no	520	677	520	0.657
chimera_m140550/963/CCS|F;size=1_and_m82645/650/CCS|F;size=1_at_279_5.8S_reversed_no_252	m140550/963/CCS|F;size=1	m82645/650/CCS|F;size=1	279	5.8S	no	650	721	650	0.387
chimera_m124686/666/CCS|F;size=2_and_m201549/1982/CCS|F;size=1_at_263_ITS2_reversed_no_253	m124686/666/CCS|F;size=2	m201549/1982/CCS|F;size=1	263	ITS2	no	583	479	583	0.549
chimera_m172760/1385/CCS|F;size=1_and_m221827/928/CCS|F;size=1_at_155_ITS1_reversed_yes_254	m172760/1385/CCS|F;size=1	m221827/928/CCS|F;size=1	155	ITS1	yes	486	493	486	0.314
chimera_m288741/926/CCS|F;size=1_and_m151994/865/CCS|F;size=1_at_302_ITS2_reversed_no_255	m288741/926/CCS|F;size=1	m151994/865/CCS|F;size=1	302	ITS2	no	555	452	555	0.668
chimera_m36313/547/CCS|F;size=1_and_m176433/1465/CCS|F;size=1_at_449_ITS2_reversed_no_256	m36313/547/CCS|F;size=1	m176433/1465/CCS|F;size=1	449	ITS2	no	767	547	767	0.821
chimera_m227643/606/CCS|F;size=1_and_m223605/1477/CCS|F;size=1_at_280_ITS2_reversed_no_257	m227643/606/CCS|F;size=1	m223605/1477/CCS|F;size=1	280	ITS2	no	548	432	548	0.648
chimera_m64361/314/CCS|F;size=1_and_m186386/1377/CCS|F;size=1_at_135_5.8S_reversed_no_258	m64361/314/CCS|F;size=1	m186386/1377/CCS|F;size=1	135	5.8S	no	520	314	520	0.43
chimera_m24483/1018/CCS|F;size=1_and_m105580/472/CCS|F;size=1_at_260_5.8S_reversed_no_259	m24483/1018/CCS|F;size=1	m105580/472/CCS|F;size=1	260	5.8S	no	472	570	472	0.456
chimera_m261356/783/CCS|F;size=1_and_m235565/1607/CCS|F;size=1_at_290_ITS2_reversed_no_260	m261356/783/CCS|F;size=1	m235565/1607/CCS|F;size=1	290	ITS2	no	524	436	524	0.665
chimera_m119967/967/CCS|F;size=2_and_m242693/711/CCS|F;size=1_at_362_ITS2_reversed_yes_261	m119967/967/CCS|F;size=2	m242693/711/CCS|F;size=1	362	ITS2	yes	559	494	559	0.733
chimera_m61022/1321/CCS|F;size=1_and_m425241/1357/CCS|F;size=1_at_365_ITS2_reversed_no_262	m61022/1321/CCS|F;size=1	m425241/1357/CCS|F;size=1	365	ITS2	no	590	597	590	0.611
chimera_m224695/434/CCS|F;size=1_and_m176872/1154/CCS|F;size=1_at_99_ITS1_reversed_no_263	m224695/434/CCS|F;size=1	m176872/1154/CCS|F;size=1	99	ITS1	no	525	434	525	0.228
chimera_m201616/1244/CCS|F;size=1_and_m83057/788/CCS|F;size=1_at_249_ITS2_reversed_no_264	m201616/1244/CCS|F;size=1	m83057/788/CCS|F;size=1	249	ITS2	no	462	453	462	0.55
chimera_m231522/916/CCS|F;size=1_and_m118944/961/CCS|F;size=1_at_295_ITS2_reversed_no_265	m231522/916/CCS|F;size=1	m118944/961/CCS|F;size=1	295	ITS2	no	429	445	429	0.663
chimera_m234915/1117/CCS|F;size=1_and_m197715/1078/CCS|F;size=1_at_124_ITS1_reversed_yes_266	m234915/1117/CCS|F;size=1	m197715/1078/CCS|F;size=1	124	ITS1	yes	508	580	508	0.214
chimera_m64554/761/CCS|F;size=1_and_m53597/1141/CCS|F;size=1_at_164_ITS1_reversed_no_267	m64554/761/CCS|F;size=1	m53597/1141/CCS|F;size=1	164	ITS1	no	467	474	467	0.346
chimera_m60903/1000/CCS|F;size=1_and_m282215/1019/CCS|F;size=1_at_517_ITS2_reversed_no_268	m60903/1000/CCS|F;size=1	m282215/1019/CCS|F;size=1	517	ITS2	no	726	693	726	0.746
chimera_m164811/1084/CCS|F;size=1_and_m207563/1074/CCS|F;size=1_at_135_ITS1_reversed_no_269	m164811/1084/CCS|F;size=1	m207563/1074/CCS|F;size=1	135	ITS1	no	545	601	545	0.225
chimera_m120137/503/CCS|F;size=1_and_m142099/626/CCS|F;size=1_at_297_ITS2_reversed_no_270	m120137/503/CCS|F;size=1	m142099/626/CCS|F;size=1	297	ITS2	no	464	432	464	0.688
chimera_m135608/991/CCS|F;size=1_and_m44676/1224/CCS|F;size=1_at_123_ITS1_reversed_no_271	m135608/991/CCS|F;size=1	m44676/1224/CCS|F;size=1	123	ITS1	no	538	528	538	0.233
chimera_m181142/685/CCS|F;size=1_and_m307530/384/CCS|F;size=1_at_223_ITS2_reversed_no_272	m181142/685/CCS|F;size=1	m307530/384/CCS|F;size=1	223	ITS2	no	384	441	384	0.506
chimera_m84606/1053/CCS|F;size=1_and_m145144/602/CCS|F;size=1_at_73_ITS1_reversed_no_273	m84606/1053/CCS|F;size=1	m145144/602/CCS|F;size=1	73	ITS1	no	504	490	504	0.149
chimera_m338569/357/CCS|F;size=1_and_m183556/800/CCS|F;size=1_at_245_ITS2_reversed_no_274	m338569/357/CCS|F;size=1	m183556/800/CCS|F;size=1	245	ITS2	no	554	357	554	0.686
chimera_m36605/1017/CCS|F;size=2_and_m129022/969/CCS|F;size=1_at_95_ITS1_reversed_no_275	m36605/1017/CCS|F;size=2	m129022/969/CCS|F;size=1	95	ITS1	no	446	492	446	0.193
chimera_m76317/1250/CCS|F;size=1_and_m418930/1074/CCS|F;size=1_at_500_ITS2_reversed_no_276	m76317/1250/CCS|F;size=1	m418930/1074/CCS|F;size=1	500	ITS2	no	736	821	736	0.609
chimera_m241256/1520/CCS|F;size=1_and_m65459/1508/CCS|F;size=1_at_495_ITS2_reversed_no_277	m241256/1520/CCS|F;size=1	m65459/1508/CCS|F;size=1	495	ITS2	no	495	552	481	0.897
chimera_m89304/712/CCS|F;size=1_and_m374648/565/CCS|F;size=1_at_527_ITS2_reversed_no_278	m89304/712/CCS|F;size=1	m374648/565/CCS|F;size=1	527	ITS2	no	565	640	565	0.823
chimera_m237515/629/CCS|F;size=1_and_m91398/1261/CCS|F;size=1_at_286_ITS2_reversed_yes_279	m237515/629/CCS|F;size=1	m91398/1261/CCS|F;size=1	286	ITS2	yes	425	542	425	0.528
chimera_m285877/500/CCS|F;size=1_and_m108821/1133/CCS|F;size=1_at_267_ITS2_reversed_no_280	m285877/500/CCS|F;size=1	m108821/1133/CCS|F;size=1	267	ITS2	no	413	500	413	0.534
chimera_m177578/603/CCS|F;size=2_and_m156649/928/CCS|F;size=1_at_265_5.8S_reversed_no_281	m177578/603/CCS|F;size=2	m156649/928/CCS|F;size=1	265	5.8S	no	548	567	548	0.467
chimera_m56953/2233/CCS|F;size=1_and_m367673/1108/CCS|F;size=2_at_83_ITS1_reversed_no_282	m56953/2233/CCS|F;size=1	m367673/1108/CCS|F;size=2	83	ITS1	no	417	498	417	0.167
chimera_m236891/918/CCS|F;size=1_and_m150830/478/CCS|F;size=1_at_228_5.8S_reversed_no_283	m236891/918/CCS|F;size=1	m150830/478/CCS|F;size=1	228	5.8S	no	478	502	478	0.454
chimera_m48820/920/CCS|F;size=1_and_m208178/1321/CCS|F;size=1_at_280_ITS2_reversed_no_284	m48820/920/CCS|F;size=1	m208178/1321/CCS|F;size=1	280	ITS2	no	546	530	546	0.528
chimera_m158242/1416/CCS|F;size=1_and_m128136/938/CCS|F;size=1_at_291_ITS2_reversed_no_285	m158242/1416/CCS|F;size=1	m128136/938/CCS|F;size=1	291	ITS2	no	531	545	531	0.534
chimera_m94297/572/CCS|F;size=1_and_m245/1474/CCS|F;size=115_at_430_ITS2_reversed_no_286	m94297/572/CCS|F;size=1	m245/1474/CCS|F;size=115	430	ITS2	no	536	572	536	0.752
chimera_m218477/620/CCS|F;size=1_and_m109269/911/CCS|F;size=1_at_363_ITS2_reversed_yes_287	m218477/620/CCS|F;size=1	m109269/911/CCS|F;size=1	363	ITS2	yes	565	508	565	0.715
chimera_m205606/1511/CCS|F;size=1_and_m393155/1182/CCS|F;size=1_at_288_ITS2_reversed_yes_288	m205606/1511/CCS|F;size=1	m393155/1182/CCS|F;size=1	288	ITS2	yes	740	501	740	0.575
chimera_m195802/1250/CCS|F;size=1_and_m222788/1499/CCS|F;size=1_at_48_ITS1_reversed_no_289	m195802/1250/CCS|F;size=1	m222788/1499/CCS|F;size=1	48	ITS1	no	444	375	444	0.128
chimera_m106510/1179/CCS|F;size=1_and_m45726/1406/CCS|F;size=1_at_162_ITS1_reversed_no_290	m106510/1179/CCS|F;size=1	m45726/1406/CCS|F;size=1	162	ITS1	no	646	591	646	0.274
chimera_m47071/615/CCS|F;size=1_and_m35937/1135/CCS|F;size=1_at_263_ITS2_reversed_no_291	m47071/615/CCS|F;size=1	m35937/1135/CCS|F;size=1	263	ITS2	no	535	524	535	0.502
chimera_m384231/1301/CCS|F;size=1_and_m7870/1053/CCS|F;size=2_at_523_ITS2_reversed_no_292	m384231/1301/CCS|F;size=1	m7870/1053/CCS|F;size=2	523	ITS2	no	523	752	522	0.695
chimera_m288796/989/CCS|F;size=1_and_m459402/779/CCS|F;size=1_at_294_ITS2_reversed_no_293	m288796/989/CCS|F;size=1	m459402/779/CCS|F;size=1	294	ITS2	no	779	500	779	0.588
chimera_m187236/572/CCS|F;size=1_and_m59459/1064/CCS|F;size=1_at_281_ITS2_reversed_no_294	m187236/572/CCS|F;size=1	m59459/1064/CCS|F;size=1	281	ITS2	no	545	545	545	0.516
chimera_m106889/1133/CCS|F;size=1_and_m130919/788/CCS|F;size=1_at_203_5.8S_reversed_no_295	m106889/1133/CCS|F;size=1	m130919/788/CCS|F;size=1	203	5.8S	no	563	501	563	0.405
chimera_m176985/1280/CCS|F;size=1_and_m317367/1535/CCS|F;size=1_at_382_ITS2_reversed_yes_296	m176985/1280/CCS|F;size=1	m317367/1535/CCS|F;size=1	382	ITS2	yes	759	622	759	0.614
chimera_m219835/519/CCS|F;size=1_and_m170291/1309/CCS|F;size=2_at_90_ITS1_reversed_no_297	m219835/519/CCS|F;size=1	m170291/1309/CCS|F;size=2	90	ITS1	no	472	453	472	0.199
chimera_m287176/1233/CCS|F;size=2_and_m17156/1585/CCS|F;size=1_at_171_ITS1_reversed_no_298	m287176/1233/CCS|F;size=2	m17156/1585/CCS|F;size=1	171	ITS1	no	463	526	463	0.325
chimera_m139364/1062/CCS|F;size=1_and_m204747/1326/CCS|F;size=1_at_165_ITS1_reversed_no_299	m139364/1062/CCS|F;size=1	m204747/1326/CCS|F;size=1	165	ITS1	no	525	572	525	0.288
chimera_m2119/1585/CCS|F;size=1_and_m28610/783/CCS|F;size=1_at_54_ITS1_reversed_no_300	m2119/1585/CCS|F;size=1	m28610/783/CCS|F;size=1	54	ITS1	no	609	399	609	0.135
chimera_m90184/819/CCS|F;size=1_and_m96982/644/CCS|F;size=1_at_381_ITS2_reversed_no_301	m90184/819/CCS|F;size=1	m96982/644/CCS|F;size=1	381	ITS2	no	511	648	511	0.588
chimera_m98158/1597/CCS|F;size=1_and_m118300/615/CCS|F;size=1_at_96_ITS1_reversed_no_302	m98158/1597/CCS|F;size=1	m118300/615/CCS|F;size=1	96	ITS1	no	513	601	513	0.16
chimera_m90279/691/CCS|F;size=1_and_m29858/761/CCS|F;size=1_at_137_ITS1_reversed_no_303	m90279/691/CCS|F;size=1	m29858/761/CCS|F;size=1	137	ITS1	no	520	459	520	0.298
chimera_m237449/647/CCS|F;size=1_and_m234099/1393/CCS|F;size=1_at_182_ITS1_reversed_no_304	m237449/647/CCS|F;size=1	m234099/1393/CCS|F;size=1	182	ITS1	no	431	551	431	0.33
chimera_m80520/535/CCS|F;size=1_and_m100862/1193/CCS|F;size=1_at_89_ITS1_reversed_no_305	m80520/535/CCS|F;size=1	m100862/1193/CCS|F;size=1	89	ITS1	no	591	454	591	0.196
chimera_m4319/1098/CCS|F;size=3_and_m153633/1006/CCS|F;size=1_at_551_ITS2_reversed_yes_306	m4319/1098/CCS|F;size=3	m153633/1006/CCS|F;size=1	551	ITS2	yes	572	655	572	0.841
chimera_m31342/1199/CCS|F;size=1_and_m257184/1370/CCS|F;size=1_at_134_ITS1_reversed_yes_307	m31342/1199/CCS|F;size=1	m257184/1370/CCS|F;size=1	134	ITS1	yes	680	416	680	0.322
chimera_m991/1405/CCS|F;size=90_and_m45071/900/CCS|F;size=1_at_360_ITS2_reversed_no_308	m991/1405/CCS|F;size=90	m45071/900/CCS|F;size=1	360	ITS2	no	558	567	558	0.635
chimera_m86816/929/CCS|F;size=1_and_m144190/837/CCS|F;size=1_at_304_ITS2_reversed_no_309	m86816/929/CCS|F;size=1	m144190/837/CCS|F;size=1	304	ITS2	no	463	568	463	0.535
chimera_m9631/678/CCS|F;size=1_and_m43974/1630/CCS|F;size=1_at_177_ITS1_reversed_no_310	m9631/678/CCS|F;size=1	m43974/1630/CCS|F;size=1	177	ITS1	no	477	586	477	0.302
chimera_m146960/1042/CCS|F;size=1_and_m166136/1138/CCS|F;size=1_at_357_ITS2_reversed_no_311	m146960/1042/CCS|F;size=1	m166136/1138/CCS|F;size=1	357	ITS2	no	646	561	646	0.636
chimera_m244412/1118/CCS|F;size=1_and_m152604/944/CCS|F;size=1_at_209_5.8S_reversed_no_312	m244412/1118/CCS|F;size=1	m152604/944/CCS|F;size=1	209	5.8S	no	709	481	709	0.435
chimera_m246105/559/CCS|F;size=1_and_m14279/1168/CCS|F;size=1_at_193_ITS1_reversed_no_313	m246105/559/CCS|F;size=1	m14279/1168/CCS|F;size=1	193	ITS1	no	552	559	552	0.345
chimera_m202986/591/CCS|F;size=1_and_m109252/1579/CCS|F;size=1_at_234_ITS2_reversed_no_314	m202986/591/CCS|F;size=1	m109252/1579/CCS|F;size=1	234	ITS2	no	651	426	651	0.549
chimera_m235870/773/CCS|F;size=1_and_m355567/326/CCS|F;size=1_at_96_ITS1_reversed_no_315	m235870/773/CCS|F;size=1	m355567/326/CCS|F;size=1	96	ITS1	no	326	434	326	0.221
chimera_m443489/1177/CCS|F;size=1_and_m297264/1368/CCS|F;size=1_at_148_ITS1_reversed_no_316	m443489/1177/CCS|F;size=1	m297264/1368/CCS|F;size=1	148	ITS1	no	608	591	608	0.25
chimera_m146990/1264/CCS|F;size=1_and_m220845/1097/CCS|F;size=1_at_217_ITS2_reversed_no_317	m146990/1264/CCS|F;size=1	m220845/1097/CCS|F;size=1	217	ITS2	no	549	407	549	0.533
chimera_m159689/1094/CCS|F;size=1_and_m45483/610/CCS|F;size=2_at_77_ITS1_reversed_yes_318	m159689/1094/CCS|F;size=1	m45483/610/CCS|F;size=2	77	ITS1	yes	432	490	432	0.157
chimera_m94297/572/CCS|F;size=1_and_m215296/1648/CCS|F;size=1_at_156_ITS1_reversed_yes_319	m94297/572/CCS|F;size=1	m215296/1648/CCS|F;size=1	156	ITS1	yes	485	572	485	0.273
chimera_m68026/561/CCS|F;size=1_and_m208642/1294/CCS|F;size=1_at_124_ITS1_reversed_no_320	m68026/561/CCS|F;size=1	m208642/1294/CCS|F;size=1	124	ITS1	no	471	411	471	0.302
chimera_m454982/847/CCS|F;size=1_and_m305756/330/CCS|F;size=1_at_250_ITS2_reversed_no_321	m454982/847/CCS|F;size=1	m305756/330/CCS|F;size=1	250	ITS2	no	330	433	330	0.577
chimera_m108326/1190/CCS|F;size=2_and_m2448/1359/CCS|F;size=43_at_103_ITS1_reversed_no_322	m108326/1190/CCS|F;size=2	m2448/1359/CCS|F;size=43	103	ITS1	no	514	493	514	0.209
chimera_m83535/1062/CCS|F;size=1_and_m26388/1096/CCS|F;size=2_at_137_ITS1_reversed_no_323	m83535/1062/CCS|F;size=1	m26388/1096/CCS|F;size=2	137	ITS1	no	404	555	404	0.247
chimera_m56366/865/CCS|F;size=1_and_m220816/1706/CCS|F;size=2_at_402_ITS2_reversed_no_324	m56366/865/CCS|F;size=1	m220816/1706/CCS|F;size=2	402	ITS2	no	496	633	496	0.635
chimera_m278718/1314/CCS|F;size=1_and_m10815/534/CCS|F;size=1_at_119_ITS1_reversed_no_325	m278718/1314/CCS|F;size=1	m10815/534/CCS|F;size=1	119	ITS1	no	534	578	534	0.206
chimera_m394318/763/CCS|F;size=1_and_m63126/1484/CCS|F;size=1_at_400_ITS2_reversed_no_326	m394318/763/CCS|F;size=1	m63126/1484/CCS|F;size=1	400	ITS2	no	533	578	533	0.692
chimera_m182573/980/CCS|F;size=2_and_m46863/1330/CCS|F;size=1_at_479_ITS2_reversed_no_327	m182573/980/CCS|F;size=2	m46863/1330/CCS|F;size=1	479	ITS2	no	644	706	644	0.678
chimera_m230732/1632/CCS|F;size=1_and_m341852/1510/CCS|F;size=1_at_118_ITS1_reversed_no_328	m230732/1632/CCS|F;size=1	m341852/1510/CCS|F;size=1	118	ITS1	no	476	588	476	0.201
chimera_m93127/656/CCS|F;size=1_and_m196521/778/CCS|F;size=1_at_165_ITS1_reversed_no_329	m93127/656/CCS|F;size=1	m196521/778/CCS|F;size=1	165	ITS1	no	423	528	423	0.312
chimera_m78559/712/CCS|F;size=1_and_m222442/481/CCS|F;size=1_at_282_ITS2_reversed_no_330	m78559/712/CCS|F;size=1	m222442/481/CCS|F;size=1	282	ITS2	no	481	399	481	0.707
chimera_m7647/1295/CCS|F;size=1_and_m106227/610/CCS|F;size=2_at_91_ITS1_reversed_no_331	m7647/1295/CCS|F;size=1	m106227/610/CCS|F;size=2	91	ITS1	no	526	494	526	0.184
chimera_m61949/886/CCS|F;size=1_and_m7400/779/CCS|F;size=1_at_208_ITS1_reversed_no_332	m61949/886/CCS|F;size=1	m7400/779/CCS|F;size=1	208	ITS1	no	569	628	569	0.331
chimera_m16504/1294/CCS|F;size=1_and_m34227/1486/CCS|F;size=1_at_536_ITS2_reversed_no_333	m16504/1294/CCS|F;size=1	m34227/1486/CCS|F;size=1	536	ITS2	no	585	668	585	0.802
chimera_m18054/875/CCS|F;size=1_and_m239493/1016/CCS|F;size=1_at_45_ITS1_reversed_no_334	m18054/875/CCS|F;size=1	m239493/1016/CCS|F;size=1	45	ITS1	no	451	425	451	0.106
chimera_m2701/1665/CCS|F;size=1_and_m99069/928/CCS|F;size=1_at_291_ITS1_reversed_no_335	m2701/1665/CCS|F;size=1	m99069/928/CCS|F;size=1	291	ITS1	no	613	986	613	0.295
chimera_m73154/462/CCS|F;size=2_and_m145212/518/CCS|F;size=1_at_244_ITS2_reversed_no_336	m73154/462/CCS|F;size=2	m145212/518/CCS|F;size=1	244	ITS2	no	518	404	518	0.604
chimera_m123758/993/CCS|F;size=1_and_m76839/629/CCS|F;size=1_at_396_ITS2_reversed_yes_337	m123758/993/CCS|F;size=1	m76839/629/CCS|F;size=1	396	ITS2	yes	462	544	462	0.728
chimera_m36440/655/CCS|F;size=1_and_m228216/664/CCS|F;size=1_at_377_ITS2_reversed_yes_338	m36440/655/CCS|F;size=1	m228216/664/CCS|F;size=1	377	ITS2	yes	492	569	492	0.663
chimera_m345144/591/CCS|F;size=1_and_m123561/1487/CCS|F;size=1_at_108_ITS1_reversed_no_339	m345144/591/CCS|F;size=1	m123561/1487/CCS|F;size=1	108	ITS1	no	506	519	506	0.208
chimera_m237149/1237/CCS|F;size=1_and_m41077/726/CCS|F;size=1_at_223_ITS2_reversed_no_340	m237149/1237/CCS|F;size=1	m41077/726/CCS|F;size=1	223	ITS2	no	559	455	559	0.49
chimera_m71316/654/CCS|F;size=1_and_m42933/466/CCS|F;size=1_at_103_ITS1_reversed_yes_341	m71316/654/CCS|F;size=1	m42933/466/CCS|F;size=1	103	ITS1	yes	466	576	466	0.179
chimera_m73629/1458/CCS|F;size=1_and_m219876/550/CCS|F;size=1_at_108_ITS1_reversed_no_342	m73629/1458/CCS|F;size=1	m219876/550/CCS|F;size=1	108	ITS1	no	442	561	442	0.193
chimera_m77596/834/CCS|F;size=2_and_m170351/1197/CCS|F;size=1_at_289_ITS2_reversed_no_343	m77596/834/CCS|F;size=2	m170351/1197/CCS|F;size=1	289	ITS2	no	490	546	490	0.529
chimera_m144139/1393/CCS|F;size=1_and_m11986/720/CCS|F;size=1_at_150_ITS1_reversed_no_344	m144139/1393/CCS|F;size=1	m11986/720/CCS|F;size=1	150	ITS1	no	469	475	469	0.316
chimera_m332486/1122/CCS|F;size=1_and_m10943/728/CCS|F;size=1_at_357_ITS2_reversed_yes_345	m332486/1122/CCS|F;size=1	m10943/728/CCS|F;size=1	357	ITS2	yes	413	599	413	0.596
chimera_m66010/1026/CCS|F;size=1_and_m113880/1493/CCS|F;size=1_at_189_ITS1_reversed_no_346	m66010/1026/CCS|F;size=1	m113880/1493/CCS|F;size=1	189	ITS1	no	419	695	419	0.272
chimera_m209803/1270/CCS|F;size=1_and_m277929/611/CCS|F;size=1_at_344_ITS2_reversed_no_347	m209803/1270/CCS|F;size=1	m277929/611/CCS|F;size=1	344	ITS2	no	533	537	533	0.641
chimera_m248664/1837/CCS|F;size=1_and_m457435/939/CCS|F;size=1_at_92_ITS1_reversed_no_348	m248664/1837/CCS|F;size=1	m457435/939/CCS|F;size=1	92	ITS1	no	532	674	532	0.136
chimera_m180334/1543/CCS|F;size=1_and_m244434/1468/CCS|F;size=1_at_385_ITS2_reversed_no_349	m180334/1543/CCS|F;size=1	m244434/1468/CCS|F;size=1	385	ITS2	no	557	575	557	0.67
chimera_m66546/717/CCS|F;size=1_and_m205920/531/CCS|F;size=1_at_144_ITS1_reversed_no_350	m66546/717/CCS|F;size=1	m205920/531/CCS|F;size=1	144	ITS1	no	531	643	531	0.224
chimera_m274053/806/CCS|F;size=1_and_m68838/1308/CCS|F;size=1_at_402_ITS2_reversed_yes_351	m274053/806/CCS|F;size=1	m68838/1308/CCS|F;size=1	402	ITS2	yes	559	598	559	0.672
chimera_m313498/1647/CCS|F;size=1_and_m93955/851/CCS|F;size=1_at_234_ITS1_reversed_no_352	m313498/1647/CCS|F;size=1	m93955/851/CCS|F;size=1	234	ITS1	no	507	786	507	0.298
chimera_m191157/1761/CCS|F;size=1_and_m279360/1381/CCS|F;size=1_at_349_ITS2_reversed_no_353	m191157/1761/CCS|F;size=1	m279360/1381/CCS|F;size=1	349	ITS2	no	793	490	793	0.712
chimera_m281598/588/CCS|F;size=1_and_m35301/1457/CCS|F;size=1_at_326_ITS2_reversed_no_354	m281598/588/CCS|F;size=1	m35301/1457/CCS|F;size=1	326	ITS2	no	510	524	510	0.622
chimera_m205609/432/CCS|F;size=1_and_m253002/1203/CCS|F;size=1_at_151_ITS1_reversed_yes_355	m205609/432/CCS|F;size=1	m253002/1203/CCS|F;size=1	151	ITS1	yes	576	432	576	0.35
chimera_m77322/916/CCS|F;size=2_and_m246354/783/CCS|F;size=1_at_344_ITS2_reversed_no_356	m77322/916/CCS|F;size=2	m246354/783/CCS|F;size=1	344	ITS2	no	482	415	482	0.829
chimera_m7842/1390/CCS|F;size=94_and_m64883/1474/CCS|F;size=1_at_452_ITS2_reversed_no_357	m7842/1390/CCS|F;size=94	m64883/1474/CCS|F;size=1	452	ITS2	no	508	647	508	0.699
chimera_m1095/396/CCS|F;size=1_and_m145387/1200/CCS|F;size=1_at_1_ITS1_reversed_no_358	m1095/396/CCS|F;size=1	m145387/1200/CCS|F;size=1	1	ITS1	no	574	396	574	0.003
chimera_m213088/1264/CCS|F;size=1_and_m311073/1061/CCS|F;size=2_at_339_ITS2_reversed_yes_359	m213088/1264/CCS|F;size=1	m311073/1061/CCS|F;size=2	339	ITS2	yes	697	575	697	0.59
chimera_m50255/870/CCS|F;size=1_and_m211462/1258/CCS|F;size=1_at_319_ITS2_reversed_no_360	m50255/870/CCS|F;size=1	m211462/1258/CCS|F;size=1	319	ITS2	no	599	589	599	0.542
chimera_m77347/1408/CCS|F;size=1_and_m293829/704/CCS|F;size=1_at_259_ITS2_reversed_no_361	m77347/1408/CCS|F;size=1	m293829/704/CCS|F;size=1	259	ITS2	no	704	521	704	0.497
chimera_m54540/606/CCS|F;size=2_and_m105956/1065/CCS|F;size=1_at_189_5.8S_reversed_no_362	m54540/606/CCS|F;size=2	m105956/1065/CCS|F;size=1	189	5.8S	no	691	538	691	0.351
chimera_m145732/552/CCS|F;size=1_and_m9108/1483/CCS|F;size=1_at_397_ITS2_reversed_no_363	m145732/552/CCS|F;size=1	m9108/1483/CCS|F;size=1	397	ITS2	no	566	552	566	0.719
chimera_m204734/290/CCS|F;size=1_and_m14485/836/CCS|F;size=1_at_210_ITS2_reversed_no_364	m204734/290/CCS|F;size=1	m14485/836/CCS|F;size=1	210	ITS2	no	430	290	430	0.724
chimera_m28610/783/CCS|F;size=1_and_m84849/1015/CCS|F;size=1_at_433_ITS2_reversed_no_365	m28610/783/CCS|F;size=1	m84849/1015/CCS|F;size=1	433	ITS2	no	520	609	520	0.711
chimera_m19715/762/CCS|F;size=1_and_m131198/857/CCS|F;size=1_at_138_ITS1_reversed_no_366	m19715/762/CCS|F;size=1	m131198/857/CCS|F;size=1	138	ITS1	no	455	442	455	0.312
chimera_m177264/1547/CCS|F;size=1_and_m239642/1481/CCS|F;size=1_at_455_ITS2_reversed_yes_367	m177264/1547/CCS|F;size=1	m239642/1481/CCS|F;size=1	455	ITS2	yes	699	635	699	0.717
chimera_m454236/883/CCS|F;size=1_and_m132910/1001/CCS|F;size=1_at_84_ITS1_reversed_no_368	m454236/883/CCS|F;size=1	m132910/1001/CCS|F;size=1	84	ITS1	no	506	565	506	0.149
chimera_m87430/1420/CCS|F;size=1_and_m86109/1014/CCS|F;size=2_at_376_ITS2_reversed_no_369	m87430/1420/CCS|F;size=1	m86109/1014/CCS|F;size=2	376	ITS2	no	665	465	665	0.809
chimera_m272966/365/CCS|F;size=1_and_m100472/444/CCS|F;size=1_at_254_ITS2_reversed_no_370	m272966/365/CCS|F;size=1	m100472/444/CCS|F;size=1	254	ITS2	no	444	365	444	0.696
chimera_m42857/848/CCS|F;size=1_and_m462325/607/CCS|F;size=1_at_82_ITS1_reversed_yes_371	m42857/848/CCS|F;size=1	m462325/607/CCS|F;size=1	82	ITS1	yes	530	392	530	0.209
chimera_m67592/574/CCS|T;size=1_and_m14559/1455/CCS|F;size=1_at_153_ITS1_reversed_no_372	m67592/574/CCS|T;size=1	m14559/1455/CCS|F;size=1	153	ITS1	no	454	460	454	0.333
chimera_m187847/653/CCS|F;size=1_and_m272041/871/CCS|F;size=1_at_117_ITS1_reversed_no_373	m187847/653/CCS|F;size=1	m272041/871/CCS|F;size=1	117	ITS1	no	533	492	533	0.238
chimera_m182224/1852/CCS|F;size=1_and_m371518/730/CCS|F;size=1_at_145_ITS1_reversed_yes_374	m182224/1852/CCS|F;size=1	m371518/730/CCS|F;size=1	145	ITS1	yes	467	474	467	0.306
chimera_m1280/460/CCS|F;size=1_and_m438111/1568/CCS|F;size=1_at_226_ITS2_reversed_no_375	m1280/460/CCS|F;size=1	m438111/1568/CCS|F;size=1	226	ITS2	no	671	460	671	0.491
chimera_m58969/539/CCS|F;size=1_and_m268693/958/CCS|F;size=1_at_23_ITS1_reversed_no_376	m58969/539/CCS|F;size=1	m268693/958/CCS|F;size=1	23	ITS1	no	532	492	532	0.047
chimera_m294421/1604/CCS|F;size=1_and_m465139/761/CCS|F;size=1_at_383_ITS2_reversed_no_377	m294421/1604/CCS|F;size=1	m465139/761/CCS|F;size=1	383	ITS2	no	667	597	667	0.642
chimera_m153867/894/CCS|F;size=1_and_m134156/673/CCS|F;size=1_at_334_ITS2_reversed_no_378	m153867/894/CCS|F;size=1	m134156/673/CCS|F;size=1	334	ITS2	no	411	485	411	0.689
chimera_m362967/1133/CCS|F;size=1_and_m110269/1709/CCS|F;size=1_at_376_ITS2_reversed_no_379	m362967/1133/CCS|F;size=1	m110269/1709/CCS|F;size=1	376	ITS2	no	532	506	532	0.743
chimera_m146183/673/CCS|F;size=1_and_m117263/1626/CCS|F;size=1_at_476_ITS2_reversed_no_380	m146183/673/CCS|F;size=1	m117263/1626/CCS|F;size=1	476	ITS2	no	502	643	502	0.74
chimera_m5666/756/CCS|F;size=1_and_m312028/661/CCS|F;size=1_at_299_ITS2_reversed_no_381	m5666/756/CCS|F;size=1	m312028/661/CCS|F;size=1	299	ITS2	no	436	537	436	0.557
chimera_m1423/1000/CCS|F;size=180_and_m313345/1244/CCS|F;size=1_at_143_ITS1_reversed_no_382	m1423/1000/CCS|F;size=180	m313345/1244/CCS|F;size=1	143	ITS1	no	482	494	482	0.289
chimera_m111644/1066/CCS|F;size=1_and_m156979/1288/CCS|F;size=1_at_320_ITS2_reversed_no_383	m111644/1066/CCS|F;size=1	m156979/1288/CCS|F;size=1	320	ITS2	no	436	570	436	0.561
chimera_m190027/1826/CCS|F;size=1_and_m318423/792/CCS|F;size=1_at_359_ITS2_reversed_no_384	m190027/1826/CCS|F;size=1	m318423/792/CCS|F;size=1	359	ITS2	no	792	548	792	0.655
chimera_m40277/1648/CCS|F;size=1_and_m107888/557/CCS|F;size=1_at_393_ITS2_reversed_no_385	m40277/1648/CCS|F;size=1	m107888/557/CCS|F;size=1	393	ITS2	no	518	623	518	0.631
chimera_m133819/1256/CCS|F;size=1_and_m30648/1088/CCS|F;size=1_at_164_ITS1_reversed_no_386	m133819/1256/CCS|F;size=1	m30648/1088/CCS|F;size=1	164	ITS1	no	557	568	557	0.289
chimera_m268151/886/CCS|F;size=1_and_m101300/563/CCS|F;size=1_at_193_5.8S_reversed_no_387	m268151/886/CCS|F;size=1	m101300/563/CCS|F;size=1	193	5.8S	no	532	543	532	0.355
chimera_m91296/691/CCS|F;size=1_and_m269044/492/CCS|F;size=1_at_116_ITS1_reversed_no_388	m91296/691/CCS|F;size=1	m269044/492/CCS|F;size=1	116	ITS1	no	443	469	443	0.247
chimera_m261095/575/CCS|F;size=1_and_m984/1302/CCS|F;size=2_at_367_ITS2_reversed_no_389	m261095/575/CCS|F;size=1	m984/1302/CCS|F;size=2	367	ITS2	no	640	517	640	0.71
chimera_m123368/1383/CCS|F;size=1_and_m162152/1549/CCS|F;size=1_at_353_ITS2_reversed_no_390	m123368/1383/CCS|F;size=1	m162152/1549/CCS|F;size=1	353	ITS2	no	730	527	730	0.67
chimera_m18054/875/CCS|F;size=1_and_m98194/1564/CCS|F;size=1_at_199_5.8S_reversed_no_391	m18054/875/CCS|F;size=1	m98194/1564/CCS|F;size=1	199	5.8S	no	621	425	621	0.468
chimera_m68398/1346/CCS|F;size=1_and_m111571/1119/CCS|F;size=1_at_258_ITS2_reversed_no_392	m68398/1346/CCS|F;size=1	m111571/1119/CCS|F;size=1	258	ITS2	no	644	523	644	0.493
chimera_m7249/605/CCS|F;size=1_and_m194137/668/CCS|F;size=1_at_85_ITS1_reversed_no_393	m7249/605/CCS|F;size=1	m194137/668/CCS|F;size=1	85	ITS1	no	533	472	533	0.18
chimera_m101893/794/CCS|F;size=1_and_m147230/457/CCS|F;size=1_at_81_ITS1_reversed_no_394	m101893/794/CCS|F;size=1	m147230/457/CCS|F;size=1	81	ITS1	no	457	454	457	0.178
chimera_m141261/994/CCS|F;size=1_and_m132706/1268/CCS|F;size=1_at_380_ITS2_reversed_no_395	m141261/994/CCS|F;size=1	m132706/1268/CCS|F;size=1	380	ITS2	no	519	523	519	0.727
chimera_m222060/699/CCS|F;size=1_and_m38904/705/CCS|F;size=1_at_92_ITS1_reversed_no_396	m222060/699/CCS|F;size=1	m38904/705/CCS|F;size=1	92	ITS1	no	393	583	393	0.158
chimera_m348124/838/CCS|F;size=1_and_m89060/777/CCS|F;size=1_at_521_ITS2_reversed_no_397	m348124/838/CCS|F;size=1	m89060/777/CCS|F;size=1	521	ITS2	no	578	781	578	0.667
chimera_m107220/1318/CCS|F;size=1_and_m28952/656/CCS|F;size=1_at_271_ITS2_reversed_no_398	m107220/1318/CCS|F;size=1	m28952/656/CCS|F;size=1	271	ITS2	no	542	520	542	0.521
chimera_m89060/777/CCS|F;size=1_and_m81930/1567/CCS|F;size=1_at_171_ITS1_reversed_no_399	m89060/777/CCS|F;size=1	m81930/1567/CCS|F;size=1	171	ITS1	no	458	578	458	0.296
chimera_m284251/589/CCS|F;size=1_and_m247433/1499/CCS|F;size=1_at_340_ITS2_reversed_no_400	m284251/589/CCS|F;size=1	m247433/1499/CCS|F;size=1	340	ITS2	no	462	482	462	0.705
chimera_m217756/503/CCS|F;size=1_and_m317696/837/CCS|F;size=1_at_287_ITS2_reversed_no_401	m217756/503/CCS|F;size=1	m317696/837/CCS|F;size=1	287	ITS2	no	577	503	577	0.571
chimera_m278552/641/CCS|F;size=1_and_m277320/789/CCS|F;size=1_at_389_ITS2_reversed_no_402	m278552/641/CCS|F;size=1	m277320/789/CCS|F;size=1	389	ITS2	no	541	641	541	0.607
chimera_m461735/1166/CCS|T;size=1_and_m53571/1232/CCS|F;size=1_at_85_ITS1_reversed_yes_403	m461735/1166/CCS|T;size=1	m53571/1232/CCS|F;size=1	85	ITS1	yes	598	445	598	0.191
chimera_m72961/1484/CCS|F;size=1_and_m113332/621/CCS|F;size=1_at_185_ITS1_reversed_no_404	m72961/1484/CCS|F;size=1	m113332/621/CCS|F;size=1	185	ITS1	no	448	604	448	0.306
chimera_m198969/1424/CCS|F;size=1_and_m272037/755/CCS|F;size=1_at_300_ITS2_reversed_no_405	m198969/1424/CCS|F;size=1	m272037/755/CCS|F;size=1	300	ITS2	no	441	541	441	0.555
chimera_m5105/1526/CCS|F;size=1_and_m198987/504/CCS|F;size=1_at_425_ITS2_reversed_no_406	m5105/1526/CCS|F;size=1	m198987/504/CCS|F;size=1	425	ITS2	no	504	702	504	0.605
chimera_m118845/535/CCS|F;size=1_and_m87326/1075/CCS|T;size=1_at_322_ITS2_reversed_no_407	m118845/535/CCS|F;size=1	m87326/1075/CCS|T;size=1	322	ITS2	no	467	535	467	0.602
chimera_m107145/976/CCS|F;size=1_and_m208066/1988/CCS|F;size=1_at_365_ITS2_reversed_no_408	m107145/976/CCS|F;size=1	m208066/1988/CCS|F;size=1	365	ITS2	no	555	548	555	0.666
chimera_m69970/419/CCS|F;size=1_and_m161646/1570/CCS|F;size=1_at_308_ITS2_reversed_no_409	m69970/419/CCS|F;size=1	m161646/1570/CCS|F;size=1	308	ITS2	no	687	419	687	0.735
chimera_m165145/1106/CCS|F;size=1_and_m92293/1103/CCS|F;size=1_at_317_ITS2_reversed_no_410	m165145/1106/CCS|F;size=1	m92293/1103/CCS|F;size=1	317	ITS2	no	547	555	547	0.571
chimera_m82252/1056/CCS|F;size=1_and_m114125/1145/CCS|F;size=1_at_315_ITS2_reversed_no_411	m82252/1056/CCS|F;size=1	m114125/1145/CCS|F;size=1	315	ITS2	no	578	559	578	0.564
chimera_m149069/880/CCS|F;size=1_and_m188328/1056/CCS|F;size=1_at_241_ITS2_reversed_no_412	m149069/880/CCS|F;size=1	m188328/1056/CCS|F;size=1	241	ITS2	no	466	432	466	0.558
chimera_m133381/1140/CCS|F;size=1_and_m202216/463/CCS|F;size=1_at_107_ITS1_reversed_no_413	m133381/1140/CCS|F;size=1	m202216/463/CCS|F;size=1	107	ITS1	no	463	546	463	0.196
chimera_m1/1273/CCS|F;size=1_and_m132816/1376/CCS|F;size=2_at_410_ITS2_reversed_no_414	m1/1273/CCS|F;size=1	m132816/1376/CCS|F;size=2	410	ITS2	no	479	520	479	0.788
chimera_m247343/1241/CCS|F;size=1_and_m151469/963/CCS|F;size=1_at_125_ITS1_reversed_no_415	m247343/1241/CCS|F;size=1	m151469/963/CCS|F;size=1	125	ITS1	no	569	465	569	0.269
chimera_m186970/1366/CCS|F;size=1_and_m288737/562/CCS|F;size=1_at_374_ITS2_reversed_no_416	m186970/1366/CCS|F;size=1	m288737/562/CCS|F;size=1	374	ITS2	no	562	506	562	0.739
chimera_m155389/1648/CCS|F;size=1_and_m217238/1113/CCS|F;size=1_at_116_ITS1_reversed_no_417	m155389/1648/CCS|F;size=1	m217238/1113/CCS|F;size=1	116	ITS1	no	644	524	644	0.221
chimera_m213954/1060/CCS|F;size=1_and_m54922/882/CCS|F;size=1_at_381_ITS2_reversed_yes_418	m213954/1060/CCS|F;size=1	m54922/882/CCS|F;size=1	381	ITS2	yes	509	579	509	0.658
chimera_m82755/835/CCS|F;size=1_and_m50621/654/CCS|F;size=1_at_228_5.8S_reversed_no_419	m82755/835/CCS|F;size=1	m50621/654/CCS|F;size=1	228	5.8S	no	526	568	526	0.401
chimera_m180025/995/CCS|F;size=1_and_m132602/1109/CCS|F;size=1_at_126_ITS1_reversed_no_420	m180025/995/CCS|F;size=1	m132602/1109/CCS|F;size=1	126	ITS1	no	596	449	596	0.281
chimera_m174187/786/CCS|F;size=1_and_m151426/941/CCS|F;size=3_at_273_ITS2_reversed_no_421	m174187/786/CCS|F;size=1	m151426/941/CCS|F;size=3	273	ITS2	no	545	453	545	0.603
chimera_m83676/747/CCS|F;size=1_and_m141274/1363/CCS|F;size=1_at_285_5.8S_reversed_no_422	m83676/747/CCS|F;size=1	m141274/1363/CCS|F;size=1	285	5.8S	no	431	606	431	0.47
chimera_m306986/538/CCS|F;size=1_and_m32621/1638/CCS|F;size=1_at_400_ITS2_reversed_no_423	m306986/538/CCS|F;size=1	m32621/1638/CCS|F;size=1	400	ITS2	no	597	538	597	0.743
chimera_m208215/701/CCS|F;size=3_and_m440031/1048/CCS|F;size=1_at_48_ITS1_reversed_no_424	m208215/701/CCS|F;size=3	m440031/1048/CCS|F;size=1	48	ITS1	no	752	530	752	0.091
chimera_m23981/678/CCS|F;size=1_and_m228826/963/CCS|F;size=1_at_251_ITS2_reversed_no_425	m23981/678/CCS|F;size=1	m228826/963/CCS|F;size=1	251	ITS2	no	460	521	460	0.482
chimera_m467148/660/CCS|F;size=1_and_m125426/859/CCS|F;size=1_at_482_ITS2_reversed_no_426	m467148/660/CCS|F;size=1	m125426/859/CCS|F;size=1	482	ITS2	no	482	660	463	0.73
chimera_m213478/1946/CCS|F;size=1_and_m345456/928/CCS|F;size=1_at_455_ITS2_reversed_no_427	m213478/1946/CCS|F;size=1	m345456/928/CCS|F;size=1	455	ITS2	no	590	618	590	0.736
chimera_m192297/541/CCS|F;size=1_and_m153412/1085/CCS|F;size=1_at_137_ITS1_reversed_no_428	m192297/541/CCS|F;size=1	m153412/1085/CCS|F;size=1	137	ITS1	no	596	541	596	0.253
chimera_m258410/512/CCS|F;size=1_and_m298291/910/CCS|F;size=1_at_92_ITS1_reversed_no_429	m258410/512/CCS|F;size=1	m298291/910/CCS|F;size=1	92	ITS1	no	565	512	565	0.18
chimera_m2392/567/CCS|F;size=1_and_m189760/782/CCS|F;size=1_at_156_ITS1_reversed_no_430	m2392/567/CCS|F;size=1	m189760/782/CCS|F;size=1	156	ITS1	no	701	512	701	0.305
chimera_m177390/1072/CCS|F;size=1_and_m69594/764/CCS|F;size=2_at_182_ITS1_reversed_no_431	m177390/1072/CCS|F;size=1	m69594/764/CCS|F;size=2	182	ITS1	no	574	560	574	0.325
chimera_m164254/1364/CCS|T;size=2_and_m173211/1654/CCS|F;size=1_at_106_ITS1_reversed_no_432	m164254/1364/CCS|T;size=2	m173211/1654/CCS|F;size=1	106	ITS1	no	425	424	425	0.25
chimera_m439676/1320/CCS|F;size=1_and_m257924/729/CCS|F;size=1_at_328_ITS2_reversed_no_433	m439676/1320/CCS|F;size=1	m257924/729/CCS|F;size=1	328	ITS2	no	557	437	557	0.751
chimera_m68552/1123/CCS|F;size=1_and_m11406/363/CCS|F;size=1_at_115_ITS1_reversed_no_434	m68552/1123/CCS|F;size=1	m11406/363/CCS|F;size=1	115	ITS1	no	363	528	363	0.218
chimera_m253874/1034/CCS|F;size=1_and_m89944/1950/CCS|F;size=1_at_58_ITS1_reversed_no_435	m253874/1034/CCS|F;size=1	m89944/1950/CCS|F;size=1	58	ITS1	no	763	505	763	0.115
chimera_m75243/1112/CCS|F;size=1_and_m138091/1254/CCS|F;size=1_at_360_ITS2_reversed_no_436	m75243/1112/CCS|F;size=1	m138091/1254/CCS|F;size=1	360	ITS2	no	582	475	582	0.758
chimera_m148304/760/CCS|F;size=2_and_m161929/1456/CCS|F;size=1_at_351_ITS2_reversed_no_437	m148304/760/CCS|F;size=2	m161929/1456/CCS|F;size=1	351	ITS2	no	530	434	530	0.809
chimera_m225569/861/CCS|F;size=1_and_m281580/1609/CCS|F;size=1_at_135_ITS1_reversed_no_438	m225569/861/CCS|F;size=1	m281580/1609/CCS|F;size=1	135	ITS1	no	596	464	596	0.291
chimera_m16469/982/CCS|F;size=1_and_m148689/551/CCS|F;size=1_at_445_ITS2_reversed_no_439	m16469/982/CCS|F;size=1	m148689/551/CCS|F;size=1	445	ITS2	no	445	618	443	0.72
chimera_m72304/666/CCS|F;size=1_and_m88657/1348/CCS|F;size=1_at_367_ITS2_reversed_no_440	m72304/666/CCS|F;size=1	m88657/1348/CCS|F;size=1	367	ITS2	no	556	555	556	0.661
chimera_m170128/1050/CCS|F;size=1_and_m48314/1564/CCS|F;size=1_at_121_ITS1_reversed_yes_441	m170128/1050/CCS|F;size=1	m48314/1564/CCS|F;size=1	121	ITS1	yes	552	557	552	0.217
chimera_m225286/1378/CCS|F;size=1_and_m321357/621/CCS|F;size=1_at_376_ITS2_reversed_no_442	m225286/1378/CCS|F;size=1	m321357/621/CCS|F;size=1	376	ITS2	no	555	558	555	0.674
chimera_m77870/1419/CCS|F;size=1_and_m102250/604/CCS|F;size=1_at_286_ITS2_reversed_no_443	m77870/1419/CCS|F;size=1	m102250/604/CCS|F;size=1	286	ITS2	no	519	460	519	0.622
chimera_m99707/1541/CCS|F;size=1_and_m123963/1559/CCS|F;size=1_at_619_ITS2_reversed_yes_444	m99707/1541/CCS|F;size=1	m123963/1559/CCS|F;size=1	619	ITS2	yes	683	888	683	0.697
chimera_m127288/613/CCS|F;size=1_and_m46227/986/CCS|F;size=1_at_322_ITS2_reversed_no_445	m127288/613/CCS|F;size=1	m46227/986/CCS|F;size=1	322	ITS2	no	554	577	554	0.558
chimera_m254005/551/CCS|F;size=1_and_m2852/1497/CCS|F;size=101_at_200_ITS2_reversed_no_446	m254005/551/CCS|F;size=1	m2852/1497/CCS|F;size=101	200	ITS2	no	607	413	607	0.484
chimera_m301201/718/CCS|F;size=1_and_m202619/829/CCS|F;size=2_at_474_ITS2_reversed_no_447	m301201/718/CCS|F;size=1	m202619/829/CCS|F;size=2	474	ITS2	no	571	668	571	0.71
chimera_m194819/1181/CCS|F;size=2_and_m392913/1172/CCS|F;size=1_at_368_ITS2_reversed_no_448	m194819/1181/CCS|F;size=2	m392913/1172/CCS|F;size=1	368	ITS2	no	424	533	424	0.69
chimera_m251441/1871/CCS|F;size=1_and_m90615/1069/CCS|F;size=1_at_152_ITS1_reversed_no_449	m251441/1871/CCS|F;size=1	m90615/1069/CCS|F;size=1	152	ITS1	no	502	732	502	0.208
chimera_m222418/1545/CCS|F;size=1_and_m44193/1771/CCS|F;size=1_at_197_5.8S_reversed_no_450	m222418/1545/CCS|F;size=1	m44193/1771/CCS|F;size=1	197	5.8S	no	663	528	663	0.373
chimera_m56206/1551/CCS|F;size=1_and_m243569/976/CCS|F;size=1_at_307_ITS2_reversed_no_451	m56206/1551/CCS|F;size=1	m243569/976/CCS|F;size=1	307	ITS2	no	523	592	523	0.519
chimera_m436763/850/CCS|F;size=1_and_m15990/1179/CCS|F;size=1_at_44_ITS1_reversed_no_452	m436763/850/CCS|F;size=1	m15990/1179/CCS|F;size=1	44	ITS1	no	492	538	492	0.082
chimera_m173567/1624/CCS|F;size=1_and_m135423/684/CCS|F;size=1_at_183_ITS1_reversed_no_453	m173567/1624/CCS|F;size=1	m135423/684/CCS|F;size=1	183	ITS1	no	517	533	517	0.343
chimera_m122561/551/CCS|F;size=1_and_m235641/945/CCS|F;size=1_at_117_ITS1_reversed_no_454	m122561/551/CCS|F;size=1	m235641/945/CCS|F;size=1	117	ITS1	no	415	493	415	0.237
chimera_m302855/718/CCS|F;size=1_and_m57335/1129/CCS|F;size=1_at_309_ITS2_reversed_no_455	m302855/718/CCS|F;size=1	m57335/1129/CCS|F;size=1	309	ITS2	no	531	556	531	0.556
chimera_m248760/1353/CCS|F;size=1_and_m344686/740/CCS|F;size=1_at_159_ITS1_reversed_no_456	m248760/1353/CCS|F;size=1	m344686/740/CCS|F;size=1	159	ITS1	no	487	561	487	0.283
chimera_m251553/1411/CCS|F;size=1_and_m140550/963/CCS|F;size=1_at_598_ITS2_reversed_no_457	m251553/1411/CCS|F;size=1	m140550/963/CCS|F;size=1	598	ITS2	no	721	785	721	0.762
chimera_m338096/678/CCS|F;size=1_and_m39434/783/CCS|F;size=1_at_120_ITS1_reversed_no_458	m338096/678/CCS|F;size=1	m39434/783/CCS|F;size=1	120	ITS1	no	622	513	622	0.234
chimera_m106400/921/CCS|F;size=1_and_m245492/582/CCS|F;size=1_at_191_5.8S_reversed_yes_459	m106400/921/CCS|F;size=1	m245492/582/CCS|F;size=1	191	5.8S	yes	470	478	470	0.4
chimera_m2946/1382/CCS|F;size=1_and_m75784/808/CCS|F;size=1_at_161_ITS1_reversed_no_460	m2946/1382/CCS|F;size=1	m75784/808/CCS|F;size=1	161	ITS1	no	521	610	521	0.264
chimera_m56015/867/CCS|F;size=2_and_m124964/1033/CCS|F;size=1_at_163_ITS1_reversed_no_461	m56015/867/CCS|F;size=2	m124964/1033/CCS|F;size=1	163	ITS1	no	669	475	669	0.343
chimera_m96057/1039/CCS|F;size=1_and_m170283/658/CCS|F;size=1_at_176_ITS1_reversed_yes_462	m96057/1039/CCS|F;size=1	m170283/658/CCS|F;size=1	176	ITS1	yes	509	542	509	0.325
chimera_m178062/658/CCS|F;size=1_and_m112777/1631/CCS|F;size=1_at_159_ITS1_reversed_no_463	m178062/658/CCS|F;size=1	m112777/1631/CCS|F;size=1	159	ITS1	no	521	510	521	0.312
chimera_m433458/1642/CCS|F;size=1_and_m88670/1168/CCS|F;size=1_at_524_ITS2_reversed_no_464	m433458/1642/CCS|F;size=1	m88670/1168/CCS|F;size=1	524	ITS2	no	581	789	581	0.664
chimera_m83658/534/CCS|F;size=1_and_m314628/920/CCS|F;size=1_at_274_ITS2_reversed_no_465	m83658/534/CCS|F;size=1	m314628/920/CCS|F;size=1	274	ITS2	no	597	534	597	0.513
chimera_m74825/852/CCS|F;size=1_and_m270106/1933/CCS|F;size=1_at_181_ITS1_reversed_no_466	m74825/852/CCS|F;size=1	m270106/1933/CCS|F;size=1	181	ITS1	no	574	603	574	0.3
chimera_m62372/1762/CCS|F;size=1_and_m95420/1322/CCS|F;size=1_at_147_ITS1_reversed_no_467	m62372/1762/CCS|F;size=1	m95420/1322/CCS|F;size=1	147	ITS1	no	608	545	608	0.27
chimera_m99770/625/CCS|F;size=1_and_m169479/557/CCS|F;size=1_at_113_ITS1_reversed_no_468	m99770/625/CCS|F;size=1	m169479/557/CCS|F;size=1	113	ITS1	no	509	487	509	0.232
chimera_m83258/1597/CCS|F;size=1_and_m419393/765/CCS|F;size=1_at_462_ITS2_reversed_no_469	m83258/1597/CCS|F;size=1	m419393/765/CCS|F;size=1	462	ITS2	no	723	610	723	0.757
chimera_m1028/814/CCS|F;size=1_and_m136983/1366/CCS|F;size=1_at_207_ITS1_reversed_no_470	m1028/814/CCS|F;size=1	m136983/1366/CCS|F;size=1	207	ITS1	no	546	639	546	0.324
chimera_m217238/1113/CCS|F;size=1_and_m189168/766/CCS|F;size=1_at_31_ITS1_reversed_no_471	m217238/1113/CCS|F;size=1	m189168/766/CCS|F;size=1	31	ITS1	no	591	644	591	0.048
chimera_m184749/1308/CCS|F;size=1_and_m84620/1045/CCS|F;size=1_at_130_ITS1_reversed_no_472	m184749/1308/CCS|F;size=1	m84620/1045/CCS|F;size=1	130	ITS1	no	408	573	408	0.227
chimera_m474033/1824/CCS|F;size=1_and_m112639/926/CCS|F;size=1_at_232_ITS1_reversed_yes_473	m474033/1824/CCS|F;size=1	m112639/926/CCS|F;size=1	232	ITS1	yes	890	1013	890	0.229
chimera_m222432/938/CCS|F;size=1_and_m62666/580/CCS|F;size=1_at_412_ITS2_reversed_no_474	m222432/938/CCS|F;size=1	m62666/580/CCS|F;size=1	412	ITS2	no	508	547	508	0.753
chimera_m256778/1192/CCS|F;size=1_and_m193438/665/CCS|F;size=1_at_54_ITS1_reversed_no_475	m256778/1192/CCS|F;size=1	m193438/665/CCS|F;size=1	54	ITS1	no	480	575	480	0.094
chimera_m3082/560/CCS|F;size=1_and_m190391/564/CCS|F;size=1_at_288_ITS2_reversed_no_476	m3082/560/CCS|F;size=1	m190391/564/CCS|F;size=1	288	ITS2	no	496	430	496	0.67
chimera_m353724/1650/CCS|F;size=1_and_m125561/1139/CCS|F;size=1_at_182_ITS1_reversed_no_477	m353724/1650/CCS|F;size=1	m125561/1139/CCS|F;size=1	182	ITS1	no	1002	942	1002	0.193
chimera_m235509/707/CCS|F;size=1_and_m138454/909/CCS|F;size=1_at_447_ITS2_reversed_no_478	m235509/707/CCS|F;size=1	m138454/909/CCS|F;size=1	447	ITS2	no	504	629	504	0.711
chimera_m212954/866/CCS|F;size=1_and_m96773/947/CCS|F;size=2_at_377_ITS2_reversed_no_479	m212954/866/CCS|F;size=1	m96773/947/CCS|F;size=2	377	ITS2	no	547	576	547	0.655
chimera_m181514/1233/CCS|F;size=2_and_m204623/573/CCS|F;size=1_at_188_ITS1_reversed_no_480	m181514/1233/CCS|F;size=2	m204623/573/CCS|F;size=1	188	ITS1	no	529	750	529	0.251
chimera_m370887/1298/CCS|F;size=1_and_m240316/627/CCS|F;size=1_at_283_5.8S_reversed_no_481	m370887/1298/CCS|F;size=1	m240316/627/CCS|F;size=1	283	5.8S	no	627	759	627	0.373
chimera_m79828/562/CCS|F;size=1_and_m196831/380/CCS|F;size=1_at_192_5.8S_reversed_no_482	m79828/562/CCS|F;size=1	m196831/380/CCS|F;size=1	192	5.8S	no	380	485	380	0.396
chimera_m232840/1023/CCS|F;size=1_and_m160062/459/CCS|F;size=1_at_81_ITS1_reversed_no_483	m232840/1023/CCS|F;size=1	m160062/459/CCS|F;size=1	81	ITS1	no	459	542	459	0.149
chimera_m227151/1158/CCS|F;size=1_and_m118587/640/CCS|F;size=1_at_312_ITS2_reversed_no_484	m227151/1158/CCS|F;size=1	m118587/640/CCS|F;size=1	312	ITS2	no	640	482	640	0.647
chimera_m35068/640/CCS|F;size=2_and_m70465/622/CCS|F;size=1_at_170_ITS1_reversed_no_485	m35068/640/CCS|F;size=2	m70465/622/CCS|F;size=1	170	ITS1	no	497	528	497	0.322
chimera_m83011/1169/CCS|F;size=1_and_m150346/616/CCS|F;size=1_at_304_ITS2_reversed_no_486	m83011/1169/CCS|F;size=1	m150346/616/CCS|F;size=1	304	ITS2	no	616	593	616	0.513
chimera_m275595/439/CCS|F;size=1_and_m149231/1266/CCS|F;size=1_at_353_ITS2_reversed_no_487	m275595/439/CCS|F;size=1	m149231/1266/CCS|F;size=1	353	ITS2	no	532	439	532	0.804
chimera_m125466/949/CCS|F;size=1_and_m296878/436/CCS|F;size=1_at_157_ITS1_reversed_no_488	m125466/949/CCS|F;size=1	m296878/436/CCS|F;size=1	157	ITS1	no	436	464	436	0.338
chimera_m195431/1283/CCS|F;size=1_and_m140741/1207/CCS|F;size=1_at_151_ITS1_reversed_no_489	m195431/1283/CCS|F;size=1	m140741/1207/CCS|F;size=1	151	ITS1	no	580	894	580	0.169
chimera_m279571/1120/CCS|F;size=1_and_m26019/1440/CCS|F;size=1_at_112_ITS1_reversed_no_490	m279571/1120/CCS|F;size=1	m26019/1440/CCS|F;size=1	112	ITS1	no	621	523	621	0.214
chimera_m408007/1747/CCS|F;size=1_and_m205486/446/CCS|F;size=1_at_277_ITS2_reversed_no_491	m408007/1747/CCS|F;size=1	m205486/446/CCS|F;size=1	277	ITS2	no	446	462	446	0.6
chimera_m136078/813/CCS|F;size=1_and_m52862/633/CCS|F;size=1_at_339_ITS2_reversed_no_492	m136078/813/CCS|F;size=1	m52862/633/CCS|F;size=1	339	ITS2	no	633	527	633	0.643
chimera_m183756/743/CCS|F;size=1_and_m17601/1588/CCS|F;size=1_at_105_ITS1_reversed_no_493	m183756/743/CCS|F;size=1	m17601/1588/CCS|F;size=1	105	ITS1	no	673	565	673	0.186
chimera_m209044/1410/CCS|F;size=1_and_m159689/493/CCS|F;size=1_at_167_ITS1_reversed_no_494	m209044/1410/CCS|F;size=1	m159689/493/CCS|F;size=1	167	ITS1	no	395	557	395	0.3
chimera_m439187/800/CCS|F;size=1_and_m180384/1695/CCS|F;size=1_at_528_ITS2_reversed_no_495	m439187/800/CCS|F;size=1	m180384/1695/CCS|F;size=1	528	ITS2	no	546	696	546	0.759
chimera_m147612/680/CCS|F;size=1_and_m76595/672/CCS|F;size=1_at_346_ITS2_reversed_no_496	m147612/680/CCS|F;size=1	m76595/672/CCS|F;size=1	346	ITS2	no	452	635	452	0.545
chimera_m106572/1254/CCS|F;size=1_and_m352335/818/CCS|F;size=1_at_176_ITS1_reversed_yes_497	m106572/1254/CCS|F;size=1	m352335/818/CCS|F;size=1	176	ITS1	yes	430	560	430	0.314
chimera_m239662/807/CCS|F;size=1_and_m259379/1607/CCS|F;size=1_at_310_ITS2_reversed_yes_498	m239662/807/CCS|F;size=1	m259379/1607/CCS|F;size=1	310	ITS2	yes	701	465	701	0.667
chimera_m59808/1304/CCS|F;size=1_and_m224901/954/CCS|F;size=1_at_462_ITS2_reversed_no_499	m59808/1304/CCS|F;size=1	m224901/954/CCS|F;size=1	462	ITS2	no	596	682	596	0.677
chimera_m308754/1183/CCS|F;size=1_and_m166347/769/CCS|F;size=1_at_384_ITS2_reversed_no_500	m308754/1183/CCS|F;size=1	m166347/769/CCS|F;size=1	384	ITS2	no	513	591	513	0.65
chimera_m183261/1142/CCS|F;size=1_and_m340218/1089/CCS|F;size=1_at_437_ITS2_reversed_no_501	m183261/1142/CCS|F;size=1	m340218/1089/CCS|F;size=1	437	ITS2	no	698	579	698	0.755
chimera_m346974/1401/CCS|F;size=1_and_m225635/893/CCS|F;size=2_at_372_ITS2_reversed_no_502	m346974/1401/CCS|F;size=1	m225635/893/CCS|F;size=2	372	ITS2	no	582	499	582	0.745
chimera_m291223/1120/CCS|F;size=1_and_m95806/1481/CCS|F;size=1_at_147_ITS1_reversed_no_503	m291223/1120/CCS|F;size=1	m95806/1481/CCS|F;size=1	147	ITS1	no	395	523	395	0.281
chimera_m299582/1685/CCS|F;size=2_and_m249924/1584/CCS|F;size=1_at_592_ITS2_reversed_no_504	m299582/1685/CCS|F;size=2	m249924/1584/CCS|F;size=1	592	ITS2	no	732	740	732	0.8
chimera_m173642/1147/CCS|F;size=1_and_m232893/598/CCS|T;size=1_at_146_ITS1_reversed_no_505	m173642/1147/CCS|F;size=1	m232893/598/CCS|T;size=1	146	ITS1	no	371	662	371	0.221
chimera_m137418/438/CCS|F;size=1_and_m91877/954/CCS|F;size=1_at_250_ITS2_reversed_no_506	m137418/438/CCS|F;size=1	m91877/954/CCS|F;size=1	250	ITS2	no	500	438	500	0.571
chimera_m404856/787/CCS|F;size=1_and_m56002/549/CCS|F;size=1_at_83_ITS1_reversed_no_507	m404856/787/CCS|F;size=1	m56002/549/CCS|F;size=1	83	ITS1	no	496	626	496	0.133
chimera_m237110/433/CCS|F;size=1_and_m165690/606/CCS|F;size=1_at_245_ITS2_reversed_no_508	m237110/433/CCS|F;size=1	m165690/606/CCS|F;size=1	245	ITS2	no	441	433	441	0.566
chimera_m178205/1267/CCS|F;size=1_and_m81310/819/CCS|F;size=1_at_232_ITS2_reversed_no_509	m178205/1267/CCS|F;size=1	m81310/819/CCS|F;size=1	232	ITS2	no	592	401	592	0.579
chimera_m285192/792/CCS|F;size=1_and_m109093/845/CCS|F;size=1_at_344_ITS2_reversed_no_510	m285192/792/CCS|F;size=1	m109093/845/CCS|F;size=1	344	ITS2	no	434	609	434	0.565
chimera_m70202/1128/CCS|F;size=1_and_m101486/336/CCS|F;size=1_at_154_ITS1_reversed_no_511	m70202/1128/CCS|F;size=1	m101486/336/CCS|F;size=1	154	ITS1	no	336	440	336	0.35
chimera_m286386/1012/CCS|F;size=1_and_m153261/767/CCS|F;size=1_at_299_5.8S_reversed_no_512	m286386/1012/CCS|F;size=1	m153261/767/CCS|F;size=1	299	5.8S	no	652	646	652	0.463
chimera_m77568/1658/CCS|F;size=1_and_m174375/1052/CCS|F;size=1_at_418_ITS2_reversed_yes_513	m77568/1658/CCS|F;size=1	m174375/1052/CCS|F;size=1	418	ITS2	yes	556	542	556	0.771
chimera_m142999/951/CCS|F;size=1_and_m96685/636/CCS|T;size=2_at_130_ITS1_reversed_no_514	m142999/951/CCS|F;size=1	m96685/636/CCS|T;size=2	130	ITS1	no	432	576	432	0.226
chimera_m240147/464/CCS|F;size=1_and_m139275/583/CCS|F;size=1_at_173_5.8S_reversed_no_515	m240147/464/CCS|F;size=1	m139275/583/CCS|F;size=1	173	5.8S	no	535	464	535	0.373
chimera_m201138/596/CCS|F;size=1_and_m195619/587/CCS|F;size=1_at_351_ITS2_reversed_no_516	m201138/596/CCS|F;size=1	m195619/587/CCS|F;size=1	351	ITS2	no	587	497	587	0.706
chimera_m138673/849/CCS|F;size=1_and_m189467/387/CCS|F;size=1_at_387_ITS2_reversed_no_517	m138673/849/CCS|F;size=1	m189467/387/CCS|F;size=1	387	ITS2	no	387	548	387	0.706
chimera_m305924/2120/CCS|F;size=1_and_m158681/1480/CCS|F;size=1_at_137_ITS1_reversed_no_518	m305924/2120/CCS|F;size=1	m158681/1480/CCS|F;size=1	137	ITS1	no	483	529	483	0.259
chimera_m223110/1178/CCS|F;size=1_and_m7165/626/CCS|F;size=1_at_477_ITS2_reversed_yes_519	m223110/1178/CCS|F;size=1	m7165/626/CCS|F;size=1	477	ITS2	yes	491	610	491	0.782
chimera_m177336/1610/CCS|F;size=1_and_m181399/1279/CCS|F;size=1_at_29_ITS1_reversed_no_520	m177336/1610/CCS|F;size=1	m181399/1279/CCS|F;size=1	29	ITS1	no	588	721	588	0.04
chimera_m277956/580/CCS|F;size=2_and_m220453/814/CCS|F;size=1_at_138_ITS1_reversed_no_521	m277956/580/CCS|F;size=2	m220453/814/CCS|F;size=1	138	ITS1	no	670	525	670	0.263
chimera_m228310/694/CCS|F;size=1_and_m109269/911/CCS|F;size=1_at_105_ITS1_reversed_no_522	m228310/694/CCS|F;size=1	m109269/911/CCS|F;size=1	105	ITS1	no	565	374	565	0.281
chimera_m90697/1001/CCS|F;size=1_and_m37844/911/CCS|F;size=2_at_98_ITS1_reversed_no_523	m90697/1001/CCS|F;size=1	m37844/911/CCS|F;size=2	98	ITS1	no	620	711	620	0.138
chimera_m297451/814/CCS|F;size=1_and_m158620/1047/CCS|F;size=1_at_32_ITS1_reversed_no_524	m297451/814/CCS|F;size=1	m158620/1047/CCS|F;size=1	32	ITS1	no	603	434	603	0.074
chimera_m374707/1009/CCS|F;size=1_and_m107304/1075/CCS|F;size=1_at_346_ITS2_reversed_no_525	m374707/1009/CCS|F;size=1	m107304/1075/CCS|F;size=1	346	ITS2	no	711	553	711	0.626
chimera_m153798/1030/CCS|F;size=1_and_m381767/1511/CCS|F;size=1_at_117_ITS1_reversed_no_526	m153798/1030/CCS|F;size=1	m381767/1511/CCS|F;size=1	117	ITS1	no	641	478	641	0.245
chimera_m382608/1530/CCS|F;size=1_and_m78390/1568/CCS|F;size=1_at_248_ITS1_reversed_no_527	m382608/1530/CCS|F;size=1	m78390/1568/CCS|F;size=1	248	ITS1	no	1237	923	1237	0.269
chimera_m113838/806/CCS|F;size=1_and_m10338/1297/CCS|F;size=1_at_75_ITS1_reversed_no_528	m113838/806/CCS|F;size=1	m10338/1297/CCS|F;size=1	75	ITS1	no	505	537	505	0.14
chimera_m122561/551/CCS|F;size=1_and_m44903/960/CCS|F;size=1_at_384_ITS2_reversed_no_529	m122561/551/CCS|F;size=1	m44903/960/CCS|F;size=1	384	ITS2	no	596	493	596	0.779
chimera_m89721/1067/CCS|F;size=1_and_m231522/916/CCS|F;size=1_at_125_ITS1_reversed_no_530	m89721/1067/CCS|F;size=1	m231522/916/CCS|F;size=1	125	ITS1	no	445	684	445	0.183
chimera_m42454/659/CCS|F;size=1_and_m33466/1172/CCS|F;size=1_at_406_ITS2_reversed_no_531	m42454/659/CCS|F;size=1	m33466/1172/CCS|F;size=1	406	ITS2	no	562	528	562	0.769
chimera_m320453/1033/CCS|F;size=1_and_m374876/615/CCS|F;size=1_at_217_5.8S_reversed_no_532	m320453/1033/CCS|F;size=1	m374876/615/CCS|F;size=1	217	5.8S	no	615	463	615	0.469
chimera_m173/1246/CCS|F;size=3_and_m64766/1011/CCS|F;size=1_at_353_ITS2_reversed_no_533	m173/1246/CCS|F;size=3	m64766/1011/CCS|F;size=1	353	ITS2	no	418	532	418	0.664
chimera_m56991/667/CCS|F;size=2_and_m79370/732/CCS|F;size=2_at_344_ITS2_reversed_no_534	m56991/667/CCS|F;size=2	m79370/732/CCS|F;size=2	344	ITS2	no	487	615	487	0.559
chimera_m327967/1275/CCS|F;size=1_and_m181871/723/CCS|F;size=1_at_392_ITS2_reversed_no_535	m327967/1275/CCS|F;size=1	m181871/723/CCS|F;size=1	392	ITS2	no	573	507	573	0.773
chimera_m96040/581/CCS|F;size=1_and_m401932/1276/CCS|F;size=1_at_116_ITS1_reversed_no_536	m96040/581/CCS|F;size=1	m401932/1276/CCS|F;size=1	116	ITS1	no	553	464	553	0.25
chimera_m40037/1010/CCS|F;size=1_and_m127398/457/CCS|F;size=1_at_194_ITS1_reversed_yes_537	m40037/1010/CCS|F;size=1	m127398/457/CCS|F;size=1	194	ITS1	yes	457	574	457	0.338
chimera_m99059/1030/CCS|F;size=1_and_m155000/1123/CCS|F;size=1_at_312_ITS2_reversed_no_538	m99059/1030/CCS|F;size=1	m155000/1123/CCS|F;size=1	312	ITS2	no	569	631	569	0.494
chimera_m18415/657/CCS|F;size=2_and_m208705/1568/CCS|F;size=1_at_113_ITS1_reversed_no_539	m18415/657/CCS|F;size=2	m208705/1568/CCS|F;size=1	113	ITS1	no	520	505	520	0.224
chimera_m290349/660/CCS|F;size=1_and_m33415/1298/CCS|F;size=1_at_120_ITS1_reversed_no_540	m290349/660/CCS|F;size=1	m33415/1298/CCS|F;size=1	120	ITS1	no	578	629	578	0.191
chimera_m276139/1270/CCS|F;size=1_and_m220721/1818/CCS|F;size=1_at_271_ITS1_reversed_yes_541	m276139/1270/CCS|F;size=1	m220721/1818/CCS|F;size=1	271	ITS1	yes	547	862	547	0.314
chimera_m321918/1097/CCS|F;size=1_and_m220663/1038/CCS|F;size=3_at_459_ITS2_reversed_no_542	m321918/1097/CCS|F;size=1	m220663/1038/CCS|F;size=3	459	ITS2	no	468	615	468	0.746
chimera_m216758/360/CCS|F;size=1_and_m58439/855/CCS|F;size=1_at_223_ITS2_reversed_no_543	m216758/360/CCS|F;size=1	m58439/855/CCS|F;size=1	223	ITS2	no	566	360	566	0.619
chimera_m85525/961/CCS|F;size=1_and_m41026/1008/CCS|F;size=1_at_115_ITS1_reversed_no_544	m85525/961/CCS|F;size=1	m41026/1008/CCS|F;size=1	115	ITS1	no	536	394	536	0.292
chimera_m172710/1087/CCS|F;size=1_and_m31567/984/CCS|F;size=1_at_154_ITS1_reversed_no_545	m172710/1087/CCS|F;size=1	m31567/984/CCS|F;size=1	154	ITS1	no	501	530	501	0.291
chimera_m182043/2011/CCS|F;size=1_and_m248664/1837/CCS|F;size=1_at_318_ITS2_reversed_no_546	m182043/2011/CCS|F;size=1	m248664/1837/CCS|F;size=1	318	ITS2	no	674	519	674	0.613
chimera_m366147/611/CCS|F;size=1_and_m175429/1017/CCS|F;size=1_at_429_ITS2_reversed_no_547	m366147/611/CCS|F;size=1	m175429/1017/CCS|F;size=1	429	ITS2	no	731	611	731	0.702
chimera_m154596/1226/CCS|F;size=1_and_m177713/1606/CCS|F;size=1_at_379_ITS2_reversed_no_548	m154596/1226/CCS|F;size=1	m177713/1606/CCS|F;size=1	379	ITS2	no	481	539	481	0.703
chimera_m168259/1458/CCS|F;size=1_and_m233127/1043/CCS|F;size=1_at_175_ITS1_reversed_no_549	m168259/1458/CCS|F;size=1	m233127/1043/CCS|F;size=1	175	ITS1	no	461	554	461	0.316
chimera_m222834/1340/CCS|F;size=1_and_m205368/787/CCS|F;size=1_at_122_ITS1_reversed_no_550	m222834/1340/CCS|F;size=1	m205368/787/CCS|F;size=1	122	ITS1	no	503	593	503	0.206
chimera_m1717/1217/CCS|F;size=1_and_m384297/1749/CCS|F;size=1_at_290_ITS2_reversed_no_551	m1717/1217/CCS|F;size=1	m384297/1749/CCS|F;size=1	290	ITS2	no	620	452	620	0.642
chimera_m55320/1335/CCS|F;size=1_and_m402954/673/CCS|F;size=1_at_119_ITS1_reversed_no_552	m55320/1335/CCS|F;size=1	m402954/673/CCS|F;size=1	119	ITS1	no	405	428	405	0.278
chimera_m191613/1232/CCS|F;size=1_and_m14163/790/CCS|F;size=1_at_154_ITS1_reversed_no_553	m191613/1232/CCS|F;size=1	m14163/790/CCS|F;size=1	154	ITS1	no	564	474	564	0.325
chimera_m115688/689/CCS|F;size=2_and_m198217/738/CCS|F;size=1_at_136_ITS1_reversed_yes_554	m115688/689/CCS|F;size=2	m198217/738/CCS|F;size=1	136	ITS1	yes	541	596	541	0.228
chimera_m101092/1086/CCS|F;size=1_and_m245974/1096/CCS|F;size=2_at_427_ITS2_reversed_no_555	m101092/1086/CCS|F;size=1	m245974/1096/CCS|F;size=2	427	ITS2	no	981	616	981	0.693
chimera_m38878/626/CCS|F;size=2_and_m118944/961/CCS|F;size=1_at_285_ITS2_reversed_no_556	m38878/626/CCS|F;size=2	m118944/961/CCS|F;size=1	285	ITS2	no	429	483	429	0.59
chimera_m306368/1078/CCS|F;size=1_and_m46386/562/CCS|F;size=1_at_248_ITS2_reversed_yes_557	m306368/1078/CCS|F;size=1	m46386/562/CCS|F;size=1	248	ITS2	yes	562	499	562	0.497
chimera_m23426/808/CCS|F;size=1_and_m314557/815/CCS|F;size=1_at_202_ITS1_reversed_yes_558	m23426/808/CCS|F;size=1	m314557/815/CCS|F;size=1	202	ITS1	yes	579	808	579	0.25
chimera_m1208/1186/CCS|F;size=1_and_m287815/641/CCS|F;size=1_at_304_ITS2_reversed_no_559	m1208/1186/CCS|F;size=1	m287815/641/CCS|F;size=1	304	ITS2	no	516	498	516	0.61
chimera_m71887/1126/CCS|F;size=1_and_m67526/1234/CCS|F;size=1_at_171_ITS1_reversed_no_560	m71887/1126/CCS|F;size=1	m67526/1234/CCS|F;size=1	171	ITS1	no	502	541	502	0.316
chimera_m62458/461/CCS|F;size=1_and_m137215/1331/CCS|F;size=1_at_124_ITS1_reversed_no_561	m62458/461/CCS|F;size=1	m137215/1331/CCS|F;size=1	124	ITS1	no	497	461	497	0.269
chimera_m87174/1111/CCS|F;size=1_and_m406849/1263/CCS|F;size=1_at_352_ITS2_reversed_no_562	m87174/1111/CCS|F;size=1	m406849/1263/CCS|F;size=1	352	ITS2	no	583	592	583	0.595
chimera_m34899/603/CCS|F;size=1_and_m74886/845/CCS|F;size=1_at_330_ITS2_reversed_no_563	m34899/603/CCS|F;size=1	m74886/845/CCS|F;size=1	330	ITS2	no	516	548	516	0.602
chimera_m83262/1268/CCS|F;size=1_and_m58613/1244/CCS|F;size=1_at_328_ITS2_reversed_no_564	m83262/1268/CCS|F;size=1	m58613/1244/CCS|F;size=1	328	ITS2	no	512	469	512	0.699
chimera_m149485/729/CCS|F;size=1_and_m54546/1243/CCS|F;size=1_at_96_ITS1_reversed_no_565	m149485/729/CCS|F;size=1	m54546/1243/CCS|F;size=1	96	ITS1	no	579	491	579	0.196
chimera_m17086/1426/CCS|F;size=1_and_m146096/479/CCS|F;size=1_at_169_ITS1_reversed_no_566	m17086/1426/CCS|F;size=1	m146096/479/CCS|F;size=1	169	ITS1	no	479	720	479	0.235
chimera_m172613/771/CCS|F;size=1_and_m419371/929/CCS|F;size=1_at_340_ITS2_reversed_no_567	m172613/771/CCS|F;size=1	m419371/929/CCS|F;size=1	340	ITS2	no	588	447	588	0.761
chimera_m118290/1496/CCS|F;size=1_and_m114318/685/CCS|F;size=2_at_229_ITS1_reversed_no_568	m118290/1496/CCS|F;size=1	m114318/685/CCS|F;size=2	229	ITS1	no	543	712	543	0.322
chimera_m78715/1259/CCS|F;size=1_and_m37582/909/CCS|F;size=1_at_73_ITS1_reversed_no_569	m78715/1259/CCS|F;size=1	m37582/909/CCS|F;size=1	73	ITS1	no	526	508	526	0.144
chimera_m29389/1616/CCS|F;size=1_and_m258096/1428/CCS|F;size=1_at_117_ITS1_reversed_yes_570	m29389/1616/CCS|F;size=1	m258096/1428/CCS|F;size=1	117	ITS1	yes	538	671	538	0.174
chimera_m179537/567/CCS|F;size=1_and_m262375/612/CCS|F;size=1_at_117_ITS1_reversed_no_571	m179537/567/CCS|F;size=1	m262375/612/CCS|F;size=1	117	ITS1	no	455	567	455	0.206
chimera_m205342/561/CCS|F;size=1_and_m180686/1178/CCS|F;size=1_at_458_ITS2_reversed_no_572	m205342/561/CCS|F;size=1	m180686/1178/CCS|F;size=1	458	ITS2	no	837	561	837	0.816
chimera_m51211/839/CCS|F;size=1_and_m33138/554/CCS|F;size=1_at_113_ITS1_reversed_no_573	m51211/839/CCS|F;size=1	m33138/554/CCS|F;size=1	113	ITS1	no	554	431	554	0.262
chimera_m90897/935/CCS|F;size=2_and_m243586/1057/CCS|F;size=1_at_165_ITS1_reversed_no_574	m90897/935/CCS|F;size=2	m243586/1057/CCS|F;size=1	165	ITS1	no	547	509	547	0.324
chimera_m125940/623/CCS|F;size=1_and_m62197/921/CCS|F;size=1_at_453_ITS2_reversed_no_575	m125940/623/CCS|F;size=1	m62197/921/CCS|F;size=1	453	ITS2	no	588	623	588	0.727
chimera_m87951/1034/CCS|F;size=1_and_m303122/794/CCS|F;size=1_at_311_ITS2_reversed_no_576	m87951/1034/CCS|F;size=1	m303122/794/CCS|F;size=1	311	ITS2	no	447	447	447	0.696
chimera_m23688/792/CCS|F;size=1_and_m309352/503/CCS|F;size=1_at_415_ITS2_reversed_yes_577	m23688/792/CCS|F;size=1	m309352/503/CCS|F;size=1	415	ITS2	yes	472	528	472	0.786
chimera_m296858/714/CCS|F;size=1_and_m210546/883/CCS|F;size=1_at_122_ITS1_reversed_no_578	m296858/714/CCS|F;size=1	m210546/883/CCS|F;size=1	122	ITS1	no	433	573	433	0.213
chimera_m113810/1514/CCS|F;size=1_and_m201521/462/CCS|F;size=1_at_437_ITS2_reversed_no_579	m113810/1514/CCS|F;size=1	m201521/462/CCS|F;size=1	437	ITS2	no	462	593	462	0.737
chimera_m288037/1154/CCS|F;size=1_and_m140995/1078/CCS|F;size=1_at_131_ITS1_reversed_no_580	m288037/1154/CCS|F;size=1	m140995/1078/CCS|F;size=1	131	ITS1	no	555	496	555	0.264
chimera_m173502/826/CCS|F;size=1_and_m179276/1715/CCS|F;size=1_at_196_5.8S_reversed_no_581	m173502/826/CCS|F;size=1	m179276/1715/CCS|F;size=1	196	5.8S	no	656	537	656	0.365
chimera_m228884/991/CCS|F;size=1_and_m219086/594/CCS|F;size=1_at_205_ITS1_reversed_no_582	m228884/991/CCS|F;size=1	m219086/594/CCS|F;size=1	205	ITS1	no	594	614	594	0.334
chimera_m116623/628/CCS|F;size=1_and_m24549/1240/CCS|F;size=1_at_203_5.8S_reversed_no_583	m116623/628/CCS|F;size=1	m24549/1240/CCS|F;size=1	203	5.8S	no	598	542	598	0.375
chimera_m118432/1215/CCS|F;size=1_and_m277669/850/CCS|F;size=1_at_163_ITS1_reversed_no_584	m118432/1215/CCS|F;size=1	m277669/850/CCS|F;size=1	163	ITS1	no	623	496	623	0.329
chimera_m145479/400/CCS|F;size=1_and_m124532/1103/CCS|F;size=1_at_114_ITS1_reversed_no_585	m145479/400/CCS|F;size=1	m124532/1103/CCS|F;size=1	114	ITS1	no	517	400	517	0.285
chimera_m21146/1009/CCS|F;size=1_and_m86951/450/CCS|F;size=1_at_313_ITS2_reversed_no_586	m21146/1009/CCS|F;size=1	m86951/450/CCS|F;size=1	313	ITS2	no	399	413	399	0.758
chimera_m34227/825/CCS|F;size=1_and_m137139/516/CCS|F;size=1_at_59_ITS1_reversed_no_587	m34227/825/CCS|F;size=1	m137139/516/CCS|F;size=1	59	ITS1	no	516	587	516	0.101
chimera_m20628/436/CCS|F;size=1_and_m184948/1415/CCS|F;size=1_at_121_ITS1_reversed_no_588	m20628/436/CCS|F;size=1	m184948/1415/CCS|F;size=1	121	ITS1	no	455	436	455	0.278
chimera_m430065/747/CCS|F;size=1_and_m250751/421/CCS|F;size=1_at_113_ITS1_reversed_no_589	m430065/747/CCS|F;size=1	m250751/421/CCS|F;size=1	113	ITS1	no	421	509	421	0.222
chimera_m131596/782/CCS|F;size=1_and_m236811/711/CCS|F;size=1_at_416_ITS2_reversed_no_590	m131596/782/CCS|F;size=1	m236811/711/CCS|F;size=1	416	ITS2	no	669	608	669	0.684
chimera_m118537/702/CCS|F;size=1_and_m101486/336/CCS|F;size=1_at_437_ITS2_reversed_no_591	m118537/702/CCS|F;size=1	m101486/336/CCS|F;size=1	437	ITS2	no	437	555	336	0.787
chimera_m55305/748/CCS|F;size=1_and_m14827/662/CCS|F;size=1_at_350_ITS2_reversed_no_592	m55305/748/CCS|F;size=1	m14827/662/CCS|F;size=1	350	ITS2	no	461	525	461	0.667
chimera_m125859/1082/CCS|F;size=1_and_m118454/1569/CCS|F;size=1_at_391_ITS2_reversed_no_593	m125859/1082/CCS|F;size=1	m118454/1569/CCS|F;size=1	391	ITS2	no	573	514	573	0.761
chimera_m154253/669/CCS|F;size=1_and_m137492/713/CCS|F;size=1_at_461_ITS2_reversed_no_594	m154253/669/CCS|F;size=1	m137492/713/CCS|F;size=1	461	ITS2	no	461	589	449	0.783
chimera_m202846/819/CCS|F;size=1_and_m123165/696/CCS|F;size=2_at_355_ITS2_reversed_no_595	m202846/819/CCS|F;size=1	m123165/696/CCS|F;size=2	355	ITS2	no	527	573	527	0.62
chimera_m226889/1141/CCS|F;size=1_and_m117263/1626/CCS|F;size=1_at_131_ITS1_reversed_no_596	m226889/1141/CCS|F;size=1	m117263/1626/CCS|F;size=1	131	ITS1	no	502	506	502	0.259
chimera_m52047/1064/CCS|F;size=1_and_m189684/1096/CCS|F;size=1_at_173_ITS1_reversed_no_597	m52047/1064/CCS|F;size=1	m189684/1096/CCS|F;size=1	173	ITS1	no	509	584	509	0.296
chimera_m12402/1356/CCS|F;size=1_and_m57605/619/CCS|F;size=1_at_69_ITS1_reversed_no_598	m12402/1356/CCS|F;size=1	m57605/619/CCS|F;size=1	69	ITS1	no	619	491	619	0.141
chimera_m184712/961/CCS|F;size=1_and_m257981/489/CCS|F;size=1_at_98_ITS1_reversed_no_599	m184712/961/CCS|F;size=1	m257981/489/CCS|F;size=1	98	ITS1	no	489	560	489	0.175
chimera_m235714/1990/CCS|F;size=1_and_m87492/551/CCS|F;size=1_at_226_5.8S_reversed_no_600	m235714/1990/CCS|F;size=1	m87492/551/CCS|F;size=1	226	5.8S	no	370	558	370	0.405
chimera_m110189/664/CCS|F;size=1_and_m205843/1213/CCS|F;size=1_at_316_ITS2_reversed_yes_601	m110189/664/CCS|F;size=1	m205843/1213/CCS|F;size=1	316	ITS2	yes	551	517	551	0.611
chimera_m44079/933/CCS|F;size=1_and_m326773/1036/CCS|F;size=1_at_239_5.8S_reversed_no_602	m44079/933/CCS|F;size=1	m326773/1036/CCS|F;size=1	239	5.8S	no	598	498	598	0.48
chimera_m235933/1632/CCS|F;size=1_and_m188186/1177/CCS|F;size=1_at_127_ITS1_reversed_no_603	m235933/1632/CCS|F;size=1	m188186/1177/CCS|F;size=1	127	ITS1	no	547	426	547	0.298
chimera_m211172/893/CCS|F;size=1_and_m28130/1865/CCS|F;size=1_at_337_ITS2_reversed_no_604	m211172/893/CCS|F;size=1	m28130/1865/CCS|F;size=1	337	ITS2	no	598	622	598	0.542
chimera_m132989/1756/CCS|F;size=1_and_m251988/1420/CCS|F;size=1_at_352_ITS2_reversed_yes_605	m132989/1756/CCS|F;size=1	m251988/1420/CCS|F;size=1	352	ITS2	yes	759	626	759	0.562
chimera_m76417/1294/CCS|F;size=2_and_m142493/1563/CCS|F;size=1_at_313_ITS2_reversed_no_606	m76417/1294/CCS|F;size=2	m142493/1563/CCS|F;size=1	313	ITS2	no	465	442	465	0.708
chimera_m81751/939/CCS|F;size=1_and_m209057/1500/CCS|F;size=1_at_130_ITS1_reversed_no_607	m81751/939/CCS|F;size=1	m209057/1500/CCS|F;size=1	130	ITS1	no	589	525	589	0.248
chimera_m92527/1489/CCS|F;size=1_and_m251306/1789/CCS|F;size=1_at_180_ITS1_reversed_no_608	m92527/1489/CCS|F;size=1	m251306/1789/CCS|F;size=1	180	ITS1	no	732	930	732	0.194
chimera_m215614/1448/CCS|F;size=1_and_m161467/1314/CCS|F;size=1_at_383_ITS2_reversed_no_609	m215614/1448/CCS|F;size=1	m161467/1314/CCS|F;size=1	383	ITS2	no	540	453	540	0.845
chimera_m262640/1259/CCS|F;size=1_and_m3923/1721/CCS|F;size=1_at_157_ITS1_reversed_no_610	m262640/1259/CCS|F;size=1	m3923/1721/CCS|F;size=1	157	ITS1	no	677	517	677	0.304
chimera_m257560/552/CCS|F;size=2_and_m95709/1294/CCS|F;size=1_at_332_ITS2_reversed_no_611	m257560/552/CCS|F;size=2	m95709/1294/CCS|F;size=1	332	ITS2	no	699	487	699	0.682
chimera_m281305/1322/CCS|F;size=1_and_m29304/866/CCS|F;size=1_at_385_ITS2_reversed_no_612	m281305/1322/CCS|F;size=1	m29304/866/CCS|F;size=1	385	ITS2	no	476	558	476	0.69
chimera_m354581/631/CCS|F;size=1_and_m65014/673/CCS|F;size=1_at_28_ITS1_reversed_no_613	m354581/631/CCS|F;size=1	m65014/673/CCS|F;size=1	28	ITS1	no	497	584	497	0.048
chimera_m290346/1884/CCS|F;size=1_and_m169121/1322/CCS|F;size=1_at_641_ITS2_reversed_yes_614	m290346/1884/CCS|F;size=1	m169121/1322/CCS|F;size=1	641	ITS2	yes	641	665	535	0.964
chimera_m265877/1614/CCS|F;size=1_and_m67719/609/CCS|F;size=1_at_94_ITS1_reversed_no_615	m265877/1614/CCS|F;size=1	m67719/609/CCS|F;size=1	94	ITS1	no	496	635	496	0.148
chimera_m235154/580/CCS|F;size=1_and_m7241/875/CCS|F;size=1_at_377_ITS2_reversed_no_616	m235154/580/CCS|F;size=1	m7241/875/CCS|F;size=1	377	ITS2	no	587	496	587	0.76
chimera_m79669/749/CCS|F;size=1_and_m4554/430/CCS|F;size=1_at_100_ITS1_reversed_no_617	m79669/749/CCS|F;size=1	m4554/430/CCS|F;size=1	100	ITS1	no	430	495	430	0.202
chimera_m343450/610/CCS|F;size=1_and_m111863/985/CCS|F;size=1_at_7_ITS1_reversed_no_618	m343450/610/CCS|F;size=1	m111863/985/CCS|F;size=1	7	ITS1	no	415	567	415	0.012
chimera_m177692/952/CCS|F;size=1_and_m138371/562/CCS|F;size=1_at_105_ITS1_reversed_no_619	m177692/952/CCS|F;size=1	m138371/562/CCS|F;size=1	105	ITS1	no	446	470	446	0.223
chimera_m10205/651/CCS|F;size=2_and_m443265/649/CCS|F;size=1_at_237_ITS2_reversed_no_620	m10205/651/CCS|F;size=2	m443265/649/CCS|F;size=1	237	ITS2	no	596	377	596	0.629
chimera_m216413/654/CCS|F;size=1_and_m62865/1589/CCS|F;size=1_at_320_ITS2_reversed_no_621	m216413/654/CCS|F;size=1	m62865/1589/CCS|F;size=1	320	ITS2	no	477	544	477	0.588
chimera_m207887/976/CCS|F;size=1_and_m88377/670/CCS|F;size=1_at_110_ITS1_reversed_yes_622	m207887/976/CCS|F;size=1	m88377/670/CCS|F;size=1	110	ITS1	yes	456	511	456	0.215
chimera_m137847/449/CCS|F;size=1_and_m49348/575/CCS|T;size=1_at_285_ITS2_reversed_no_623	m137847/449/CCS|F;size=1	m49348/575/CCS|T;size=1	285	ITS2	no	365	449	365	0.635
chimera_m274614/906/CCS|F;size=1_and_m32626/739/CCS|F;size=1_at_169_ITS1_reversed_no_624	m274614/906/CCS|F;size=1	m32626/739/CCS|F;size=1	169	ITS1	no	492	527	492	0.321
chimera_m91277/900/CCS|F;size=1_and_m213949/507/CCS|F;size=1_at_291_ITS2_reversed_no_625	m91277/900/CCS|F;size=1	m213949/507/CCS|F;size=1	291	ITS2	no	507	443	507	0.657
chimera_m182458/729/CCS|F;size=1_and_m132669/1009/CCS|F;size=1_at_254_ITS2_reversed_no_626	m182458/729/CCS|F;size=1	m132669/1009/CCS|F;size=1	254	ITS2	no	619	515	619	0.493
chimera_m200200/939/CCS|F;size=2_and_m60383/953/CCS|F;size=1_at_140_ITS1_reversed_no_627	m200200/939/CCS|F;size=2	m60383/953/CCS|F;size=1	140	ITS1	no	608	443	608	0.316
chimera_m269966/1540/CCS|F;size=1_and_m178034/506/CCS|F;size=1_at_362_ITS2_reversed_no_628	m269966/1540/CCS|F;size=1	m178034/506/CCS|F;size=1	362	ITS2	no	405	495	405	0.731
chimera_m246696/1146/CCS|F;size=1_and_m12865/662/CCS|F;size=2_at_114_ITS1_reversed_no_629	m246696/1146/CCS|F;size=1	m12865/662/CCS|F;size=2	114	ITS1	no	498	505	498	0.226
chimera_m118890/919/CCS|F;size=2_and_m178205/1267/CCS|F;size=1_at_154_ITS1_reversed_yes_630	m118890/919/CCS|F;size=2	m178205/1267/CCS|F;size=1	154	ITS1	yes	401	564	401	0.273
chimera_m370910/967/CCS|T;size=1_and_m206125/601/CCS|F;size=1_at_202_5.8S_reversed_no_631	m370910/967/CCS|T;size=1	m206125/601/CCS|F;size=1	202	5.8S	no	498	427	498	0.473
chimera_m84197/1055/CCS|F;size=1_and_m259076/414/CCS|F;size=1_at_170_ITS1_reversed_no_632	m84197/1055/CCS|F;size=1	m259076/414/CCS|F;size=1	170	ITS1	no	414	719	414	0.236
chimera_m211253/927/CCS|F;size=1_and_m229717/1039/CCS|F;size=1_at_196_ITS1_reversed_no_633	m211253/927/CCS|F;size=1	m229717/1039/CCS|F;size=1	196	ITS1	no	604	589	604	0.333
chimera_m77870/1419/CCS|F;size=1_and_m239913/510/CCS|F;size=1_at_321_ITS2_reversed_no_634	m77870/1419/CCS|F;size=1	m239913/510/CCS|F;size=1	321	ITS2	no	510	460	510	0.698
chimera_m250952/1288/CCS|F;size=2_and_m27726/1084/CCS|F;size=1_at_410_ITS2_reversed_no_635	m250952/1288/CCS|F;size=2	m27726/1084/CCS|F;size=1	410	ITS2	no	650	579	650	0.708
chimera_m253067/720/CCS|F;size=1_and_m33451/1289/CCS|F;size=1_at_53_ITS1_reversed_no_636	m253067/720/CCS|F;size=1	m33451/1289/CCS|F;size=1	53	ITS1	no	560	565	560	0.094
chimera_m102759/536/CCS|F;size=1_and_m39222/414/CCS|F;size=2_at_324_ITS2_reversed_no_637	m102759/536/CCS|F;size=1	m39222/414/CCS|F;size=2	324	ITS2	no	388	536	388	0.604
chimera_m129616/683/CCS|F;size=1_and_m77322/916/CCS|F;size=2_at_256_ITS2_reversed_no_638	m129616/683/CCS|F;size=1	m77322/916/CCS|F;size=2	256	ITS2	no	415	437	415	0.586
chimera_m74532/1433/CCS|F;size=1_and_m61101/690/CCS|F;size=1_at_90_ITS1_reversed_no_639	m74532/1433/CCS|F;size=1	m61101/690/CCS|F;size=1	90	ITS1	no	488	519	488	0.173
chimera_m232517/528/CCS|F;size=1_and_m62195/1714/CCS|F;size=1_at_364_ITS2_reversed_no_640	m232517/528/CCS|F;size=1	m62195/1714/CCS|F;size=1	364	ITS2	no	518	499	518	0.729
chimera_m8957/1097/CCS|F;size=1_and_m2480/894/CCS|F;size=1_at_326_ITS2_reversed_no_641	m8957/1097/CCS|F;size=1	m2480/894/CCS|F;size=1	326	ITS2	no	381	497	381	0.656
chimera_m213362/920/CCS|F;size=1_and_m66034/737/CCS|F;size=1_at_257_ITS1_reversed_no_642	m213362/920/CCS|F;size=1	m66034/737/CCS|F;size=1	257	ITS1	no	673	770	673	0.334
chimera_m4993/487/CCS|F;size=1_and_m118466/1116/CCS|T;size=1_at_373_ITS2_reversed_yes_643	m4993/487/CCS|F;size=1	m118466/1116/CCS|T;size=1	373	ITS2	yes	487	487	487	0.766
chimera_m99074/1368/CCS|F;size=1_and_m273696/412/CCS|F;size=1_at_292_ITS2_reversed_no_644	m99074/1368/CCS|F;size=1	m273696/412/CCS|F;size=1	292	ITS2	no	412	598	412	0.488
chimera_m71390/582/CCS|F;size=1_and_m289051/593/CCS|F;size=1_at_86_ITS1_reversed_no_645	m71390/582/CCS|F;size=1	m289051/593/CCS|F;size=1	86	ITS1	no	593	471	593	0.183
chimera_m39082/1103/CCS|F;size=1_and_m107673/1257/CCS|F;size=1_at_103_ITS1_reversed_no_646	m39082/1103/CCS|F;size=1	m107673/1257/CCS|F;size=1	103	ITS1	no	410	579	410	0.178
chimera_m65422/549/CCS|F;size=1_and_m303711/442/CCS|F;size=1_at_167_ITS1_reversed_no_647	m65422/549/CCS|F;size=1	m303711/442/CCS|F;size=1	167	ITS1	no	442	549	442	0.304
chimera_m177596/1474/CCS|F;size=1_and_m131575/664/CCS|F;size=1_at_388_ITS2_reversed_yes_648	m177596/1474/CCS|F;size=1	m131575/664/CCS|F;size=1	388	ITS2	yes	496	597	496	0.65
chimera_m79648/822/CCS|F;size=1_and_m84722/723/CCS|F;size=1_at_198_ITS1_reversed_no_649	m79648/822/CCS|F;size=1	m84722/723/CCS|F;size=1	198	ITS1	no	456	691	456	0.287
chimera_m275024/681/CCS|F;size=1_and_m204430/1284/CCS|T;size=1_at_91_ITS1_reversed_no_650	m275024/681/CCS|F;size=1	m204430/1284/CCS|T;size=1	91	ITS1	no	420	497	420	0.183
chimera_m65553/463/CCS|F;size=1_and_m274353/1447/CCS|F;size=1_at_314_ITS2_reversed_no_651	m65553/463/CCS|F;size=1	m274353/1447/CCS|F;size=1	314	ITS2	no	464	463	464	0.678
chimera_m103079/739/CCS|F;size=2_and_m294136/1346/CCS|F;size=1_at_262_ITS2_reversed_no_652	m103079/739/CCS|F;size=2	m294136/1346/CCS|F;size=1	262	ITS2	no	566	521	566	0.503
chimera_m10474/536/CCS|F;size=2_and_m93435/1401/CCS|F;size=1_at_107_ITS1_reversed_no_653	m10474/536/CCS|F;size=2	m93435/1401/CCS|F;size=1	107	ITS1	no	507	485	507	0.221
chimera_m56470/757/CCS|F;size=1_and_m47140/1072/CCS|F;size=1_at_269_ITS2_reversed_no_654	m56470/757/CCS|F;size=1	m47140/1072/CCS|F;size=1	269	ITS2	no	494	415	494	0.648
chimera_m196484/1031/CCS|F;size=1_and_m6050/717/CCS|F;size=3_at_101_ITS1_reversed_no_655	m196484/1031/CCS|F;size=1	m6050/717/CCS|F;size=3	101	ITS1	no	584	624	584	0.162
chimera_m242871/1112/CCS|F;size=1_and_m8043/1095/CCS|F;size=2_at_168_ITS1_reversed_no_656	m242871/1112/CCS|F;size=1	m8043/1095/CCS|F;size=2	168	ITS1	no	751	502	751	0.335
chimera_m139965/1173/CCS|F;size=1_and_m229717/1039/CCS|F;size=1_at_263_ITS2_reversed_no_657	m139965/1173/CCS|F;size=1	m229717/1039/CCS|F;size=1	263	ITS2	no	604	487	604	0.54
chimera_m91251/1292/CCS|F;size=1_and_m12256/1379/CCS|F;size=1_at_306_ITS2_reversed_no_658	m91251/1292/CCS|F;size=1	m12256/1379/CCS|F;size=1	306	ITS2	no	449	483	449	0.634
chimera_m22475/882/CCS|F;size=1_and_m65843/475/CCS|F;size=1_at_213_ITS1_reversed_no_659	m22475/882/CCS|F;size=1	m65843/475/CCS|F;size=1	213	ITS1	no	475	619	475	0.344
chimera_m53661/1207/CCS|F;size=2_and_m142389/814/CCS|F;size=1_at_525_ITS2_reversed_no_660	m53661/1207/CCS|F;size=2	m142389/814/CCS|F;size=1	525	ITS2	no	525	702	462	0.748
chimera_m113252/1574/CCS|F;size=1_and_m156540/976/CCS|F;size=1_at_91_ITS1_reversed_yes_661	m113252/1574/CCS|F;size=1	m156540/976/CCS|F;size=1	91	ITS1	yes	595	427	595	0.213
chimera_m3156/1678/CCS|F;size=148_and_m206472/559/CCS|F;size=1_at_410_ITS2_reversed_no_662	m3156/1678/CCS|F;size=148	m206472/559/CCS|F;size=1	410	ITS2	no	518	681	518	0.602
chimera_m43929/1288/CCS|F;size=1_and_m127808/618/CCS|F;size=1_at_178_ITS1_reversed_no_663	m43929/1288/CCS|F;size=1	m127808/618/CCS|F;size=1	178	ITS1	no	421	663	421	0.268
chimera_m37947/1032/CCS|F;size=2_and_m204706/901/CCS|F;size=1_at_60_ITS1_reversed_no_664	m37947/1032/CCS|F;size=2	m204706/901/CCS|F;size=1	60	ITS1	no	484	681	484	0.088
chimera_m246702/509/CCS|F;size=1_and_m51221/694/CCS|F;size=2_at_474_ITS2_reversed_no_665	m246702/509/CCS|F;size=1	m51221/694/CCS|F;size=2	474	ITS2	no	583	509	583	0.931
chimera_m118457/1224/CCS|F;size=1_and_m298341/543/CCS|F;size=1_at_105_ITS1_reversed_no_666	m118457/1224/CCS|F;size=1	m298341/543/CCS|F;size=1	105	ITS1	no	516	421	516	0.249
chimera_m340087/983/CCS|F;size=1_and_m34002/1178/CCS|F;size=1_at_118_ITS1_reversed_no_667	m340087/983/CCS|F;size=1	m34002/1178/CCS|F;size=1	118	ITS1	no	533	538	533	0.219
chimera_m33657/1494/CCS|F;size=1_and_m157521/813/CCS|F;size=2_at_420_ITS2_reversed_no_668	m33657/1494/CCS|F;size=1	m157521/813/CCS|F;size=2	420	ITS2	no	468	657	468	0.639
chimera_m331746/1184/CCS|F;size=1_and_m379363/1490/CCS|F;size=1_at_428_ITS2_reversed_no_669	m331746/1184/CCS|F;size=1	m379363/1490/CCS|F;size=1	428	ITS2	no	520	727	520	0.589
chimera_m281127/829/CCS|F;size=1_and_m376932/1029/CCS|F;size=1_at_315_ITS2_reversed_yes_670	m281127/829/CCS|F;size=1	m376932/1029/CCS|F;size=1	315	ITS2	yes	698	520	698	0.606
chimera_m15874/797/CCS|F;size=1_and_m991/1405/CCS|F;size=90_at_381_ITS2_reversed_no_671	m15874/797/CCS|F;size=1	m991/1405/CCS|F;size=90	381	ITS2	no	567	503	567	0.757
chimera_m125599/1412/CCS|F;size=1_and_m61890/738/CCS|F;size=1_at_310_ITS2_reversed_no_672	m125599/1412/CCS|F;size=1	m61890/738/CCS|F;size=1	310	ITS2	no	565	496	565	0.625
chimera_m42008/485/CCS|F;size=1_and_m141157/980/CCS|F;size=2_at_277_ITS2_reversed_no_673	m42008/485/CCS|F;size=1	m141157/980/CCS|F;size=2	277	ITS2	no	464	485	464	0.571
chimera_m166718/1134/CCS|F;size=2_and_m164673/610/CCS|F;size=1_at_428_ITS2_reversed_no_674	m166718/1134/CCS|F;size=2	m164673/610/CCS|F;size=1	428	ITS2	no	484	623	484	0.687
chimera_m167292/945/CCS|F;size=1_and_m154904/499/CCS|F;size=1_at_147_ITS1_reversed_no_675	m167292/945/CCS|F;size=1	m154904/499/CCS|F;size=1	147	ITS1	no	436	520	436	0.283
chimera_m9862/1056/CCS|F;size=1_and_m11104/1157/CCS|F;size=1_at_262_ITS2_reversed_no_676	m9862/1056/CCS|F;size=1	m11104/1157/CCS|F;size=1	262	ITS2	no	564	494	564	0.53
chimera_m112104/1478/CCS|F;size=1_and_m199689/969/CCS|F;size=1_at_105_ITS1_reversed_yes_677	m112104/1478/CCS|F;size=1	m199689/969/CCS|F;size=1	105	ITS1	yes	690	563	690	0.187
chimera_m298795/1183/CCS|F;size=1_and_m156403/1215/CCS|F;size=1_at_115_ITS1_reversed_no_678	m298795/1183/CCS|F;size=1	m156403/1215/CCS|F;size=1	115	ITS1	no	417	608	417	0.189
chimera_m293861/850/CCS|F;size=1_and_m236872/1222/CCS|F;size=1_at_275_ITS2_reversed_no_679	m293861/850/CCS|F;size=1	m236872/1222/CCS|F;size=1	275	ITS2	no	648	433	648	0.635
chimera_m226648/1325/CCS|F;size=1_and_m85891/1383/CCS|F;size=1_at_410_ITS2_reversed_no_680	m226648/1325/CCS|F;size=1	m85891/1383/CCS|F;size=1	410	ITS2	no	463	688	463	0.596
chimera_m118037/708/CCS|F;size=1_and_m238268/929/CCS|F;size=1_at_405_ITS2_reversed_no_681	m118037/708/CCS|F;size=1	m238268/929/CCS|F;size=1	405	ITS2	no	540	679	540	0.596
chimera_m17482/1199/CCS|F;size=1_and_m356836/406/CCS|F;size=1_at_223_ITS2_reversed_no_682	m17482/1199/CCS|F;size=1	m356836/406/CCS|F;size=1	223	ITS2	no	406	377	406	0.592
chimera_m374994/506/CCS|F;size=1_and_m146086/1529/CCS|F;size=1_at_359_ITS2_reversed_no_683	m374994/506/CCS|F;size=1	m146086/1529/CCS|F;size=1	359	ITS2	no	536	506	536	0.709
chimera_m213499/474/CCS|F;size=1_and_m329217/1328/CCS|F;size=1_at_94_ITS1_reversed_yes_684	m213499/474/CCS|F;size=1	m329217/1328/CCS|F;size=1	94	ITS1	yes	608	474	608	0.198
chimera_m52727/871/CCS|F;size=1_and_m113806/1320/CCS|F;size=1_at_202_5.8S_reversed_no_685	m52727/871/CCS|F;size=1	m113806/1320/CCS|F;size=1	202	5.8S	no	485	517	485	0.391
chimera_m468103/1150/CCS|F;size=1_and_m234529/503/CCS|F;size=1_at_160_ITS1_reversed_no_686	m468103/1150/CCS|F;size=1	m234529/503/CCS|F;size=1	160	ITS1	no	451	685	451	0.234
chimera_m218916/840/CCS|F;size=1_and_m66946/283/CCS|F;size=1_at_189_ITS2_reversed_no_687	m218916/840/CCS|F;size=1	m66946/283/CCS|F;size=1	189	ITS2	no	283	364	283	0.519
chimera_m8185/577/CCS|F;size=1_and_m327817/1717/CCS|F;size=1_at_148_ITS1_reversed_no_688	m8185/577/CCS|F;size=1	m327817/1717/CCS|F;size=1	148	ITS1	no	605	423	605	0.35
chimera_m185365/790/CCS|F;size=1_and_m65424/586/CCS|F;size=1_at_570_ITS2_reversed_no_689	m185365/790/CCS|F;size=1	m65424/586/CCS|F;size=1	570	ITS2	no	570	724	488	0.787
chimera_m159085/579/CCS|F;size=1_and_m143711/555/CCS|F;size=1_at_158_ITS1_reversed_no_690	m159085/579/CCS|F;size=1	m143711/555/CCS|F;size=1	158	ITS1	no	555	489	555	0.323
chimera_m158226/1144/CCS|F;size=1_and_m66162/1324/CCS|F;size=1_at_366_ITS2_reversed_no_691	m158226/1144/CCS|F;size=1	m66162/1324/CCS|F;size=1	366	ITS2	no	444	570	444	0.642
chimera_m230093/987/CCS|F;size=1_and_m96230/443/CCS|F;size=1_at_123_ITS1_reversed_no_692	m230093/987/CCS|F;size=1	m96230/443/CCS|F;size=1	123	ITS1	no	443	377	443	0.326
chimera_m10966/1263/CCS|F;size=1_and_m100673/1261/CCS|F;size=1_at_279_ITS2_reversed_no_693	m10966/1263/CCS|F;size=1	m100673/1261/CCS|F;size=1	279	ITS2	no	501	391	501	0.714
chimera_m113314/845/CCS|F;size=1_and_m3746/1194/CCS|F;size=1_at_100_ITS1_reversed_no_694	m113314/845/CCS|F;size=1	m3746/1194/CCS|F;size=1	100	ITS1	no	517	464	517	0.216
chimera_m340218/1089/CCS|F;size=1_and_m270785/1140/CCS|F;size=1_at_486_ITS2_reversed_no_695	m340218/1089/CCS|F;size=1	m270785/1140/CCS|F;size=1	486	ITS2	no	533	698	533	0.696
chimera_m29746/731/CCS|F;size=1_and_m165862/1506/CCS|F;size=2_at_252_ITS2_reversed_no_696	m29746/731/CCS|F;size=1	m165862/1506/CCS|F;size=2	252	ITS2	no	561	472	561	0.534
chimera_m177979/738/CCS|F;size=2_and_m165599/1474/CCS|F;size=1_at_138_ITS1_reversed_no_697	m177979/738/CCS|F;size=2	m165599/1474/CCS|F;size=1	138	ITS1	no	690	503	690	0.274
chimera_m264172/884/CCS|F;size=1_and_m187523/558/CCS|F;size=2_at_100_ITS1_reversed_no_698	m264172/884/CCS|F;size=1	m187523/558/CCS|F;size=2	100	ITS1	no	449	480	449	0.208
chimera_m84560/621/CCS|F;size=1_and_m223689/1107/CCS|F;size=1_at_174_ITS1_reversed_no_699	m84560/621/CCS|F;size=1	m223689/1107/CCS|F;size=1	174	ITS1	no	572	565	572	0.308
chimera_m391226/817/CCS|F;size=1_and_m39483/1000/CCS|F;size=1_at_140_ITS1_reversed_no_700	m391226/817/CCS|F;size=1	m39483/1000/CCS|F;size=1	140	ITS1	no	598	526	598	0.266
chimera_m233793/1170/CCS|F;size=1_and_m190894/460/CCS|F;size=1_at_327_ITS2_reversed_no_701	m233793/1170/CCS|F;size=1	m190894/460/CCS|F;size=1	327	ITS2	no	460	503	460	0.65
chimera_m196544/612/CCS|F;size=1_and_m195172/1218/CCS|F;size=1_at_56_ITS1_reversed_no_702	m196544/612/CCS|F;size=1	m195172/1218/CCS|F;size=1	56	ITS1	no	572	444	572	0.126
chimera_m220916/685/CCS|F;size=1_and_m188442/859/CCS|F;size=2_at_260_ITS2_reversed_no_703	m220916/685/CCS|F;size=1	m188442/859/CCS|F;size=2	260	ITS2	no	458	456	458	0.57
chimera_m153684/1082/CCS|F;size=1_and_m7535/1214/CCS|F;size=1_at_369_ITS2_reversed_no_704	m153684/1082/CCS|F;size=1	m7535/1214/CCS|F;size=1	369	ITS2	no	562	555	562	0.665
chimera_m335651/432/CCS|F;size=1_and_m252912/1313/CCS|F;size=1_at_161_5.8S_reversed_no_705	m335651/432/CCS|F;size=1	m252912/1313/CCS|F;size=1	161	5.8S	no	674	432	674	0.373
chimera_m109840/498/CCS|F;size=1_and_m241338/426/CCS|F;size=1_at_95_ITS1_reversed_no_706	m109840/498/CCS|F;size=1	m241338/426/CCS|F;size=1	95	ITS1	no	426	425	426	0.224
chimera_m217588/790/CCS|F;size=1_and_m92584/1575/CCS|F;size=1_at_314_ITS2_reversed_no_707	m217588/790/CCS|F;size=1	m92584/1575/CCS|F;size=1	314	ITS2	no	465	436	465	0.72
chimera_m59316/523/CCS|F;size=1_and_m10307/1437/CCS|F;size=1_at_69_ITS1_reversed_no_708	m59316/523/CCS|F;size=1	m10307/1437/CCS|F;size=1	69	ITS1	no	554	523	554	0.132
chimera_m17967/678/CCS|F;size=2_and_m120158/1001/CCS|F;size=1_at_129_ITS1_reversed_yes_709	m17967/678/CCS|F;size=2	m120158/1001/CCS|F;size=1	129	ITS1	yes	558	604	558	0.214
chimera_m238749/1019/CCS|F;size=1_and_m198438/1756/CCS|F;size=1_at_350_ITS2_reversed_no_710	m238749/1019/CCS|F;size=1	m198438/1756/CCS|F;size=1	350	ITS2	no	546	505	546	0.693
chimera_m167755/484/CCS|F;size=1_and_m38085/1162/CCS|F;size=1_at_126_ITS1_reversed_no_711	m167755/484/CCS|F;size=1	m38085/1162/CCS|F;size=1	126	ITS1	no	539	380	539	0.332
chimera_m208998/1302/CCS|F;size=1_and_m172831/1736/CCS|F;size=1_at_430_ITS2_reversed_no_712	m208998/1302/CCS|F;size=1	m172831/1736/CCS|F;size=1	430	ITS2	no	577	566	577	0.76
chimera_m251183/815/CCS|F;size=1_and_m299597/630/CCS|F;size=1_at_78_ITS1_reversed_no_713	m251183/815/CCS|F;size=1	m299597/630/CCS|F;size=1	78	ITS1	no	537	399	537	0.195
chimera_m99512/1452/CCS|F;size=1_and_m84456/1413/CCS|F;size=1_at_147_ITS1_reversed_no_714	m99512/1452/CCS|F;size=1	m84456/1413/CCS|F;size=1	147	ITS1	no	622	637	622	0.231
chimera_m243647/703/CCS|F;size=1_and_m50255/870/CCS|F;size=1_at_391_ITS2_reversed_no_715	m243647/703/CCS|F;size=1	m50255/870/CCS|F;size=1	391	ITS2	no	589	537	589	0.728
chimera_m163695/1271/CCS|F;size=1_and_m57058/1841/CCS|F;size=1_at_445_ITS2_reversed_no_716	m163695/1271/CCS|F;size=1	m57058/1841/CCS|F;size=1	445	ITS2	no	563	639	563	0.696
chimera_m97720/1006/CCS|F;size=1_and_m185346/1751/CCS|F;size=1_at_425_ITS2_reversed_no_717	m97720/1006/CCS|F;size=1	m185346/1751/CCS|F;size=1	425	ITS2	no	547	515	547	0.825
chimera_m417157/1641/CCS|F;size=1_and_m207187/1043/CCS|F;size=1_at_497_ITS2_reversed_no_718	m417157/1641/CCS|F;size=1	m207187/1043/CCS|F;size=1	497	ITS2	no	497	681	480	0.73
chimera_m205149/1054/CCS|F;size=1_and_m110372/1538/CCS|F;size=1_at_20_ITS1_reversed_no_719	m205149/1054/CCS|F;size=1	m110372/1538/CCS|F;size=1	20	ITS1	no	416	454	416	0.044
chimera_m302514/715/CCS|F;size=1_and_m227192/714/CCS|F;size=1_at_198_ITS1_reversed_no_720	m302514/715/CCS|F;size=1	m227192/714/CCS|F;size=1	198	ITS1	no	545	715	545	0.277
chimera_m140937/1090/CCS|F;size=1_and_m43439/820/CCS|F;size=1_at_103_ITS1_reversed_no_721	m140937/1090/CCS|F;size=1	m43439/820/CCS|F;size=1	103	ITS1	no	525	448	525	0.23
chimera_m49557/865/CCS|F;size=1_and_m128900/305/CCS|F;size=1_at_124_ITS1_reversed_no_722	m49557/865/CCS|F;size=1	m128900/305/CCS|F;size=1	124	ITS1	no	305	528	305	0.235
chimera_m50846/1237/CCS|F;size=1_and_m151469/963/CCS|F;size=1_at_140_ITS1_reversed_no_723	m50846/1237/CCS|F;size=1	m151469/963/CCS|F;size=1	140	ITS1	no	569	558	569	0.251
chimera_m176841/484/CCS|F;size=1_and_m253965/458/CCS|F;size=1_at_103_ITS1_reversed_no_724	m176841/484/CCS|F;size=1	m253965/458/CCS|F;size=1	103	ITS1	no	416	484	416	0.213
chimera_m202216/463/CCS|F;size=1_and_m174574/651/CCS|F;size=1_at_257_ITS2_reversed_no_725	m202216/463/CCS|F;size=1	m174574/651/CCS|F;size=1	257	ITS2	no	567	463	567	0.555
chimera_m112391/1401/CCS|F;size=1_and_m102310/1583/CCS|F;size=1_at_88_ITS1_reversed_no_726	m112391/1401/CCS|F;size=1	m102310/1583/CCS|F;size=1	88	ITS1	no	473	411	473	0.214
chimera_m52558/1591/CCS|F;size=1_and_m281643/654/CCS|F;size=1_at_401_ITS2_reversed_no_727	m52558/1591/CCS|F;size=1	m281643/654/CCS|F;size=1	401	ITS2	no	593	560	593	0.716
chimera_m136166/1552/CCS|F;size=1_and_m150945/445/CCS|F;size=1_at_459_ITS2_reversed_no_728	m136166/1552/CCS|F;size=1	m150945/445/CCS|F;size=1	459	ITS2	no	459	670	445	0.685
chimera_m140678/1445/CCS|F;size=2_and_m50722/1085/CCS|F;size=1_at_57_ITS1_reversed_no_729	m140678/1445/CCS|F;size=2	m50722/1085/CCS|F;size=1	57	ITS1	no	559	485	559	0.118
chimera_m35686/724/CCS|F;size=1_and_m145391/1601/CCS|F;size=1_at_348_ITS2_reversed_no_730	m35686/724/CCS|F;size=1	m145391/1601/CCS|F;size=1	348	ITS2	no	569	516	569	0.674
chimera_m263509/699/CCS|F;size=1_and_m4728/605/CCS|F;size=1_at_151_ITS1_reversed_no_731	m263509/699/CCS|F;size=1	m4728/605/CCS|F;size=1	151	ITS1	no	519	441	519	0.342
chimera_m177523/944/CCS|F;size=1_and_m4368/932/CCS|F;size=1_at_355_ITS2_reversed_no_732	m177523/944/CCS|F;size=1	m4368/932/CCS|F;size=1	355	ITS2	no	813	560	813	0.634
chimera_m57635/555/CCS|F;size=1_and_m169486/1126/CCS|F;size=1_at_106_ITS1_reversed_no_733	m57635/555/CCS|F;size=1	m169486/1126/CCS|F;size=1	106	ITS1	no	421	458	421	0.231
chimera_m449468/1810/CCS|F;size=1_and_m112824/646/CCS|F;size=1_at_153_ITS1_reversed_no_734	m449468/1810/CCS|F;size=1	m112824/646/CCS|F;size=1	153	ITS1	no	592	543	592	0.282
chimera_m95288/1091/CCS|F;size=1_and_m9283/609/CCS|F;size=2_at_351_ITS2_reversed_no_735	m95288/1091/CCS|F;size=1	m9283/609/CCS|F;size=2	351	ITS2	no	565	573	565	0.613
chimera_m306410/1465/CCS|F;size=1_and_m167132/994/CCS|F;size=1_at_286_ITS2_reversed_no_736	m306410/1465/CCS|F;size=1	m167132/994/CCS|F;size=1	286	ITS2	no	737	502	737	0.57
chimera_m10538/1137/CCS|F;size=4_and_m44507/1217/CCS|F;size=1_at_429_ITS2_reversed_no_737	m10538/1137/CCS|F;size=4	m44507/1217/CCS|F;size=1	429	ITS2	no	595	582	595	0.737
chimera_m78344/1018/CCS|F;size=1_and_m66798/723/CCS|F;size=1_at_135_ITS1_reversed_no_738	m78344/1018/CCS|F;size=1	m66798/723/CCS|F;size=1	135	ITS1	no	426	537	426	0.251
chimera_m210744/636/CCS|F;size=1_and_m284314/1433/CCS|F;size=2_at_125_ITS1_reversed_no_739	m210744/636/CCS|F;size=1	m284314/1433/CCS|F;size=2	125	ITS1	no	548	585	548	0.214
chimera_m154356/667/CCS|F;size=1_and_m189171/852/CCS|F;size=1_at_131_ITS1_reversed_no_740	m154356/667/CCS|F;size=1	m189171/852/CCS|F;size=1	131	ITS1	no	489	580	489	0.226
chimera_m84576/1280/CCS|F;size=2_and_m46838/889/CCS|F;size=2_at_117_ITS1_reversed_no_741	m84576/1280/CCS|F;size=2	m46838/889/CCS|F;size=2	117	ITS1	no	414	543	414	0.215
chimera_m181243/826/CCS|F;size=1_and_m61451/895/CCS|F;size=1_at_65_ITS1_reversed_no_742	m181243/826/CCS|F;size=1	m61451/895/CCS|F;size=1	65	ITS1	no	438	454	438	0.143
chimera_m119657/646/CCS|F;size=1_and_m45478/941/CCS|F;size=1_at_327_ITS2_reversed_no_743	m119657/646/CCS|F;size=1	m45478/941/CCS|F;size=1	327	ITS2	no	643	568	643	0.576
chimera_m206035/718/CCS|F;size=1_and_m5524/952/CCS|F;size=1_at_225_5.8S_reversed_no_744	m206035/718/CCS|F;size=1	m5524/952/CCS|F;size=1	225	5.8S	no	466	489	466	0.46
chimera_m347164/1244/CCS|F;size=1_and_m95774/1423/CCS|F;size=1_at_395_ITS2_reversed_no_745	m347164/1244/CCS|F;size=1	m95774/1423/CCS|F;size=1	395	ITS2	no	438	521	438	0.758
chimera_m111632/826/CCS|F;size=1_and_m173147/798/CCS|F;size=2_at_355_ITS2_reversed_no_746	m111632/826/CCS|F;size=1	m173147/798/CCS|F;size=2	355	ITS2	no	604	570	604	0.623
chimera_m4102/600/CCS|F;size=1_and_m250424/2005/CCS|F;size=1_at_107_ITS1_reversed_no_747	m4102/600/CCS|F;size=1	m250424/2005/CCS|F;size=1	107	ITS1	no	575	386	575	0.277
chimera_m133322/941/CCS|F;size=2_and_m421622/1362/CCS|F;size=1_at_475_ITS2_reversed_no_748	m133322/941/CCS|F;size=2	m421622/1362/CCS|F;size=1	475	ITS2	no	846	522	846	0.91
chimera_m50059/811/CCS|F;size=1_and_m123103/1443/CCS|F;size=1_at_282_ITS2_reversed_no_749	m50059/811/CCS|F;size=1	m123103/1443/CCS|F;size=1	282	ITS2	no	606	569	606	0.496
chimera_m39359/1682/CCS|F;size=1_and_m313634/1395/CCS|F;size=1_at_117_ITS1_reversed_no_750	m39359/1682/CCS|F;size=1	m313634/1395/CCS|F;size=1	117	ITS1	no	606	487	606	0.24
chimera_m200870/1260/CCS|F;size=1_and_m241364/484/CCS|F;size=1_at_366_ITS2_reversed_no_751	m200870/1260/CCS|F;size=1	m241364/484/CCS|F;size=1	366	ITS2	no	423	617	423	0.593
chimera_m70110/468/CCS|F;size=1_and_m247690/1101/CCS|F;size=1_at_195_5.8S_reversed_no_752	m70110/468/CCS|F;size=1	m247690/1101/CCS|F;size=1	195	5.8S	no	585	468	585	0.417
chimera_m186756/910/CCS|F;size=1_and_m137613/918/CCS|F;size=1_at_147_ITS1_reversed_no_753	m186756/910/CCS|F;size=1	m137613/918/CCS|F;size=1	147	ITS1	no	445	532	445	0.276
chimera_m249328/440/CCS|F;size=1_and_m210427/494/CCS|F;size=1_at_169_5.8S_reversed_no_754	m249328/440/CCS|F;size=1	m210427/494/CCS|F;size=1	169	5.8S	no	427	440	427	0.384
chimera_m86738/780/CCS|F;size=1_and_m58655/739/CCS|F;size=1_at_491_ITS2_reversed_no_755	m86738/780/CCS|F;size=1	m58655/739/CCS|F;size=1	491	ITS2	no	491	780	458	0.629
chimera_m109164/708/CCS|F;size=1_and_m44353/1166/CCS|F;size=2_at_285_ITS2_reversed_no_756	m109164/708/CCS|F;size=1	m44353/1166/CCS|F;size=2	285	ITS2	no	660	478	660	0.596
chimera_m297351/597/CCS|F;size=1_and_m15093/561/CCS|F;size=1_at_105_ITS1_reversed_yes_757	m297351/597/CCS|F;size=1	m15093/561/CCS|F;size=1	105	ITS1	yes	505	490	505	0.214
chimera_m225808/398/CCS|F;size=1_and_m203057/1113/CCS|T;size=1_at_271_ITS2_reversed_no_758	m225808/398/CCS|F;size=1	m203057/1113/CCS|T;size=1	271	ITS2	no	466	398	466	0.681
chimera_m189760/782/CCS|F;size=1_and_m237236/958/CCS|F;size=1_at_410_ITS2_reversed_no_759	m189760/782/CCS|F;size=1	m237236/958/CCS|F;size=1	410	ITS2	no	601	701	601	0.585
chimera_m282901/1214/CCS|F;size=1_and_m239941/639/CCS|F;size=2_at_49_ITS1_reversed_no_760	m282901/1214/CCS|F;size=1	m239941/639/CCS|F;size=2	49	ITS1	no	526	716	526	0.068
chimera_m18138/657/CCS|F;size=1_and_m151737/1428/CCS|F;size=1_at_119_ITS1_reversed_no_761	m18138/657/CCS|F;size=1	m151737/1428/CCS|F;size=1	119	ITS1	no	485	419	485	0.284
chimera_m307682/1106/CCS|F;size=1_and_m430752/535/CCS|F;size=1_at_418_ITS2_reversed_no_762	m307682/1106/CCS|F;size=1	m430752/535/CCS|F;size=1	418	ITS2	no	535	484	535	0.864
chimera_m173248/1399/CCS|F;size=1_and_m231007/760/CCS|F;size=1_at_238_ITS2_reversed_yes_763	m173248/1399/CCS|F;size=1	m231007/760/CCS|F;size=1	238	ITS2	yes	506	393	506	0.606
chimera_m121180/1184/CCS|F;size=1_and_m219465/509/CCS|F;size=1_at_265_ITS2_reversed_no_764	m121180/1184/CCS|F;size=1	m219465/509/CCS|F;size=1	265	ITS2	no	509	396	509	0.669
chimera_m264465/541/CCS|F;size=1_and_m170292/1549/CCS|F;size=1_at_397_ITS2_reversed_no_765	m264465/541/CCS|F;size=1	m170292/1549/CCS|F;size=1	397	ITS2	no	542	470	542	0.845
chimera_m165973/666/CCS|F;size=1_and_m236895/1134/CCS|F;size=1_at_96_ITS1_reversed_no_766	m165973/666/CCS|F;size=1	m236895/1134/CCS|F;size=1	96	ITS1	no	599	413	599	0.232
chimera_m22600/1043/CCS|F;size=1_and_m345052/570/CCS|F;size=1_at_214_5.8S_reversed_no_767	m22600/1043/CCS|F;size=1	m345052/570/CCS|F;size=1	214	5.8S	no	506	526	506	0.407
chimera_m302864/1477/CCS|F;size=1_and_m17212/890/CCS|F;size=1_at_438_ITS2_reversed_no_768	m302864/1477/CCS|F;size=1	m17212/890/CCS|F;size=1	438	ITS2	no	492	628	492	0.697
chimera_m92615/758/CCS|F;size=1_and_m110148/1254/CCS|F;size=2_at_314_ITS2_reversed_no_769	m92615/758/CCS|F;size=1	m110148/1254/CCS|F;size=2	314	ITS2	no	532	526	532	0.597
chimera_m241282/637/CCS|F;size=1_and_m348426/1683/CCS|F;size=1_at_351_ITS2_reversed_no_770	m241282/637/CCS|F;size=1	m348426/1683/CCS|F;size=1	351	ITS2	no	613	637	613	0.551
chimera_m161046/625/CCS|F;size=2_and_m257467/1048/CCS|F;size=1_at_236_5.8S_reversed_no_771	m161046/625/CCS|F;size=2	m257467/1048/CCS|F;size=1	236	5.8S	no	640	518	640	0.456
chimera_m52557/571/CCS|F;size=1_and_m63955/407/CCS|F;size=1_at_119_ITS1_reversed_no_772	m52557/571/CCS|F;size=1	m63955/407/CCS|F;size=1	119	ITS1	no	407	571	407	0.208
chimera_m252766/704/CCS|F;size=1_and_m124248/730/CCS|F;size=1_at_388_ITS2_reversed_no_773	m252766/704/CCS|F;size=1	m124248/730/CCS|F;size=1	388	ITS2	no	557	535	557	0.725
chimera_m123993/1303/CCS|F;size=1_and_m434918/503/CCS|F;size=1_at_45_ITS1_reversed_no_774	m123993/1303/CCS|F;size=1	m434918/503/CCS|F;size=1	45	ITS1	no	503	601	503	0.075
chimera_m295290/596/CCS|F;size=1_and_m440350/1117/CCS|F;size=1_at_193_ITS1_reversed_no_775	m295290/596/CCS|F;size=1	m440350/1117/CCS|F;size=1	193	ITS1	no	858	596	858	0.324
chimera_m153955/1017/CCS|F;size=1_and_m278690/525/CCS|F;size=1_at_418_ITS2_reversed_no_776	m153955/1017/CCS|F;size=1	m278690/525/CCS|F;size=1	418	ITS2	no	479	651	479	0.642
chimera_m236396/1163/CCS|F;size=1_and_m54792/934/CCS|F;size=1_at_145_ITS1_reversed_no_777	m236396/1163/CCS|F;size=1	m54792/934/CCS|F;size=1	145	ITS1	no	540	526	540	0.276
chimera_m705/1068/CCS|F;size=1_and_m10869/568/CCS|F;size=2_at_373_ITS2_reversed_no_778	m705/1068/CCS|F;size=1	m10869/568/CCS|F;size=2	373	ITS2	no	434	583	434	0.64
chimera_m425361/1373/CCS|F;size=1_and_m17637/1231/CCS|F;size=2_at_281_5.8S_reversed_yes_779	m425361/1373/CCS|F;size=1	m17637/1231/CCS|F;size=2	281	5.8S	yes	405	635	405	0.443
chimera_m56446/1120/CCS|F;size=2_and_m93192/954/CCS|F;size=1_at_63_ITS1_reversed_no_780	m56446/1120/CCS|F;size=2	m93192/954/CCS|F;size=1	63	ITS1	no	574	484	574	0.13
chimera_m49001/1028/CCS|F;size=1_and_m5949/495/CCS|F;size=1_at_86_ITS1_reversed_no_781	m49001/1028/CCS|F;size=1	m5949/495/CCS|F;size=1	86	ITS1	no	495	395	495	0.218
chimera_m9176/682/CCS|F;size=2_and_m169723/385/CCS|F;size=1_at_329_ITS2_reversed_no_782	m9176/682/CCS|F;size=2	m169723/385/CCS|F;size=1	329	ITS2	no	385	490	385	0.671
chimera_m161488/729/CCS|F;size=1_and_m235018/901/CCS|F;size=1_at_346_ITS2_reversed_no_783	m161488/729/CCS|F;size=1	m235018/901/CCS|F;size=1	346	ITS2	no	631	582	631	0.595
chimera_m203713/791/CCS|F;size=1_and_m215601/672/CCS|F;size=1_at_323_ITS2_reversed_no_784	m203713/791/CCS|F;size=1	m215601/672/CCS|F;size=1	323	ITS2	no	484	454	484	0.711
chimera_m194482/1599/CCS|F;size=1_and_m88539/584/CCS|F;size=1_at_75_ITS1_reversed_no_785	m194482/1599/CCS|F;size=1	m88539/584/CCS|F;size=1	75	ITS1	no	450	517	450	0.145
chimera_m152229/961/CCS|F;size=1_and_m355422/525/CCS|F;size=1_at_365_ITS2_reversed_no_786	m152229/961/CCS|F;size=1	m355422/525/CCS|F;size=1	365	ITS2	no	441	464	441	0.787
chimera_m236332/479/CCS|F;size=1_and_m37287/1349/CCS|F;size=1_at_67_ITS1_reversed_no_787	m236332/479/CCS|F;size=1	m37287/1349/CCS|F;size=1	67	ITS1	no	564	479	564	0.14
chimera_m252292/579/CCS|F;size=1_and_m123357/734/CCS|F;size=1_at_127_ITS1_reversed_no_788	m252292/579/CCS|F;size=1	m123357/734/CCS|F;size=1	127	ITS1	no	397	507	397	0.25
chimera_m236763/1709/CCS|F;size=1_and_m98941/1004/CCS|F;size=1_at_145_ITS1_reversed_no_789	m236763/1709/CCS|F;size=1	m98941/1004/CCS|F;size=1	145	ITS1	no	392	567	392	0.256
chimera_m261109/560/CCS|F;size=1_and_m245040/1424/CCS|F;size=1_at_69_ITS1_reversed_no_790	m261109/560/CCS|F;size=1	m245040/1424/CCS|F;size=1	69	ITS1	no	612	372	612	0.185
chimera_m174419/475/CCS|F;size=1_and_m242363/1374/CCS|F;size=1_at_184_5.8S_reversed_no_791	m174419/475/CCS|F;size=1	m242363/1374/CCS|F;size=1	184	5.8S	no	497	475	497	0.387
chimera_m270013/792/CCS|F;size=1_and_m112270/966/CCS|F;size=1_at_294_ITS2_reversed_no_792	m270013/792/CCS|F;size=1	m112270/966/CCS|F;size=1	294	ITS2	no	644	519	644	0.566
chimera_m161842/660/CCS|F;size=1_and_m198969/1424/CCS|F;size=1_at_380_ITS2_reversed_no_793	m161842/660/CCS|F;size=1	m198969/1424/CCS|F;size=1	380	ITS2	no	541	520	541	0.731
chimera_m353638/624/CCS|F;size=1_and_m22188/985/CCS|F;size=1_at_141_ITS1_reversed_no_794	m353638/624/CCS|F;size=1	m22188/985/CCS|F;size=1	141	ITS1	no	731	552	731	0.255
chimera_m467436/1836/CCS|F;size=1_and_m234101/513/CCS|F;size=1_at_407_ITS2_reversed_no_795	m467436/1836/CCS|F;size=1	m234101/513/CCS|F;size=1	407	ITS2	no	513	590	513	0.69
chimera_m112989/682/CCS|F;size=1_and_m249205/1166/CCS|F;size=1_at_283_ITS2_reversed_no_796	m112989/682/CCS|F;size=1	m249205/1166/CCS|F;size=1	283	ITS2	no	536	517	536	0.547
chimera_m264129/1290/CCS|F;size=1_and_m161301/1571/CCS|F;size=1_at_350_ITS2_reversed_no_797	m264129/1290/CCS|F;size=1	m161301/1571/CCS|F;size=1	350	ITS2	no	603	597	603	0.586
chimera_m178298/776/CCS|F;size=1_and_m25021/1560/CCS|F;size=1_at_96_ITS1_reversed_no_798	m178298/776/CCS|F;size=1	m25021/1560/CCS|F;size=1	96	ITS1	no	581	579	581	0.166
chimera_m22657/498/CCS|F;size=1_and_m85581/590/CCS|F;size=1_at_138_ITS1_reversed_no_799	m22657/498/CCS|F;size=1	m85581/590/CCS|F;size=1	138	ITS1	no	590	498	590	0.277
chimera_m155997/1068/CCS|F;size=1_and_m80352/1080/CCS|F;size=1_at_356_ITS2_reversed_no_800	m155997/1068/CCS|F;size=1	m80352/1080/CCS|F;size=1	356	ITS2	no	375	541	375	0.658
chimera_m472098/812/CCS|F;size=1_and_m89839/811/CCS|F;size=1_at_559_ITS2_reversed_no_801	m472098/812/CCS|F;size=1	m89839/811/CCS|F;size=1	559	ITS2	no	559	812	472	0.688
chimera_m363378/476/CCS|F;size=1_and_m123462/1430/CCS|F;size=1_at_32_ITS1_reversed_no_802	m363378/476/CCS|F;size=1	m123462/1430/CCS|F;size=1	32	ITS1	no	554	440	554	0.073
chimera_m221799/1262/CCS|F;size=1_and_m152053/1468/CCS|F;size=1_at_121_ITS1_reversed_no_803	m221799/1262/CCS|F;size=1	m152053/1468/CCS|F;size=1	121	ITS1	no	417	580	417	0.209
chimera_m226394/1457/CCS|F;size=1_and_m50217/568/CCS|F;size=1_at_350_ITS2_reversed_no_804	m226394/1457/CCS|F;size=1	m50217/568/CCS|F;size=1	350	ITS2	no	568	590	568	0.593
chimera_m159066/872/CCS|F;size=1_and_m97587/500/CCS|F;size=2_at_189_ITS1_reversed_no_805	m159066/872/CCS|F;size=1	m97587/500/CCS|F;size=2	189	ITS1	no	420	561	420	0.337
chimera_m204879/1613/CCS|F;size=1_and_m89393/391/CCS|F;size=1_at_73_ITS1_reversed_no_806	m204879/1613/CCS|F;size=1	m89393/391/CCS|F;size=1	73	ITS1	no	391	420	391	0.174
chimera_m24478/998/CCS|F;size=2_and_m291965/885/CCS|F;size=1_at_30_ITS1_reversed_no_807	m24478/998/CCS|F;size=2	m291965/885/CCS|F;size=1	30	ITS1	no	447	393	447	0.076
chimera_m185509/644/CCS|F;size=1_and_m271514/1177/CCS|F;size=1_at_148_ITS1_reversed_no_808	m185509/644/CCS|F;size=1	m271514/1177/CCS|F;size=1	148	ITS1	no	596	440	596	0.336
chimera_m45415/1480/CCS|F;size=2_and_m72118/1302/CCS|F;size=1_at_276_ITS2_reversed_no_809	m45415/1480/CCS|F;size=2	m72118/1302/CCS|F;size=1	276	ITS2	no	549	483	549	0.571
chimera_m86746/621/CCS|F;size=1_and_m236123/596/CCS|F;size=1_at_108_ITS1_reversed_no_810	m86746/621/CCS|F;size=1	m236123/596/CCS|F;size=1	108	ITS1	no	483	522	483	0.207
chimera_m283336/1863/CCS|F;size=1_and_m26203/738/CCS|F;size=1_at_353_ITS2_reversed_no_811	m283336/1863/CCS|F;size=1	m26203/738/CCS|F;size=1	353	ITS2	no	552	575	552	0.614
chimera_m117499/896/CCS|F;size=1_and_m26962/763/CCS|F;size=2_at_329_ITS2_reversed_no_812	m117499/896/CCS|F;size=1	m26962/763/CCS|F;size=2	329	ITS2	no	575	531	575	0.62
chimera_m419763/1288/CCS|F;size=1_and_m168838/1143/CCS|F;size=1_at_137_ITS1_reversed_no_813	m419763/1288/CCS|F;size=1	m168838/1143/CCS|F;size=1	137	ITS1	no	454	531	454	0.258
chimera_m187669/868/CCS|F;size=1_and_m100318/1517/CCS|F;size=1_at_282_ITS2_reversed_no_814	m187669/868/CCS|F;size=1	m100318/1517/CCS|F;size=1	282	ITS2	no	533	586	533	0.481
chimera_m168922/1400/CCS|F;size=1_and_m110324/552/CCS|F;size=1_at_169_ITS1_reversed_no_815	m168922/1400/CCS|F;size=1	m110324/552/CCS|F;size=1	169	ITS1	no	492	576	492	0.293
chimera_m29776/839/CCS|F;size=1_and_m102089/936/CCS|F;size=1_at_107_ITS1_reversed_no_816	m29776/839/CCS|F;size=1	m102089/936/CCS|F;size=1	107	ITS1	no	495	420	495	0.255
chimera_m204091/628/CCS|F;size=1_and_m224595/695/CCS|F;size=1_at_270_ITS2_reversed_no_817	m204091/628/CCS|F;size=1	m224595/695/CCS|F;size=1	270	ITS2	no	430	470	430	0.574
chimera_m112447/971/CCS|F;size=1_and_m253611/835/CCS|F;size=1_at_135_ITS1_reversed_no_818	m112447/971/CCS|F;size=1	m253611/835/CCS|F;size=1	135	ITS1	no	538	578	538	0.234
chimera_m39418/1828/CCS|F;size=2_and_m96859/1368/CCS|F;size=1_at_63_ITS1_reversed_yes_819	m39418/1828/CCS|F;size=2	m96859/1368/CCS|F;size=1	63	ITS1	yes	522	533	522	0.118
chimera_m215614/1448/CCS|F;size=1_and_m272213/1764/CCS|F;size=1_at_147_ITS1_reversed_no_820	m215614/1448/CCS|F;size=1	m272213/1764/CCS|F;size=1	147	ITS1	no	573	453	573	0.325
chimera_m12814/1389/CCS|F;size=1_and_m164250/640/CCS|F;size=1_at_437_ITS2_reversed_no_821	m12814/1389/CCS|F;size=1	m164250/640/CCS|F;size=1	437	ITS2	no	437	614	419	0.712
chimera_m105606/1438/CCS|F;size=1_and_m156237/566/CCS|F;size=1_at_296_5.8S_reversed_no_822	m105606/1438/CCS|F;size=1	m156237/566/CCS|F;size=1	296	5.8S	no	464	619	464	0.478
chimera_m141013/1480/CCS|F;size=1_and_m179671/582/CCS|F;size=1_at_272_ITS2_reversed_no_823	m141013/1480/CCS|F;size=1	m179671/582/CCS|F;size=1	272	ITS2	no	439	435	439	0.625
chimera_m93252/642/CCS|F;size=1_and_m178088/284/CCS|F;size=1_at_144_ITS1_reversed_no_824	m93252/642/CCS|F;size=1	m178088/284/CCS|F;size=1	144	ITS1	no	284	506	284	0.285
chimera_m143633/438/CCS|F;size=1_and_m169962/712/CCS|F;size=1_at_283_ITS2_reversed_yes_825	m143633/438/CCS|F;size=1	m169962/712/CCS|F;size=1	283	ITS2	yes	519	438	519	0.646
chimera_m246099/780/CCS|F;size=1_and_m27087/529/CCS|F;size=1_at_419_ITS2_reversed_no_826	m246099/780/CCS|F;size=1	m27087/529/CCS|F;size=1	419	ITS2	no	529	621	529	0.675
chimera_m154269/1265/CCS|F;size=1_and_m244168/776/CCS|F;size=1_at_334_ITS2_reversed_no_827	m154269/1265/CCS|F;size=1	m244168/776/CCS|F;size=1	334	ITS2	no	447	546	447	0.612
chimera_m275929/1272/CCS|F;size=1_and_m188788/1267/CCS|F;size=1_at_102_ITS1_reversed_no_828	m275929/1272/CCS|F;size=1	m188788/1267/CCS|F;size=1	102	ITS1	no	604	595	604	0.171
chimera_m44188/897/CCS|F;size=1_and_m163486/585/CCS|F;size=1_at_340_ITS2_reversed_no_829	m44188/897/CCS|F;size=1	m163486/585/CCS|F;size=1	340	ITS2	no	486	583	486	0.583
chimera_m67010/656/CCS|F;size=1_and_m101812/497/CCS|F;size=1_at_307_ITS2_reversed_no_830	m67010/656/CCS|F;size=1	m101812/497/CCS|F;size=1	307	ITS2	no	497	483	497	0.636
chimera_m54478/1850/CCS|F;size=1_and_m66156/673/CCS|F;size=1_at_334_ITS2_reversed_no_831	m54478/1850/CCS|F;size=1	m66156/673/CCS|F;size=1	334	ITS2	no	591	682	591	0.49
chimera_m76780/987/CCS|F;size=1_and_m68889/1258/CCS|F;size=1_at_280_ITS2_reversed_no_832	m76780/987/CCS|F;size=1	m68889/1258/CCS|F;size=1	280	ITS2	no	647	535	647	0.523
chimera_m466310/1237/CCS|F;size=1_and_m236446/578/CCS|F;size=1_at_517_ITS2_reversed_no_833	m466310/1237/CCS|F;size=1	m236446/578/CCS|F;size=1	517	ITS2	no	524	682	524	0.758
chimera_m312443/803/CCS|F;size=1_and_m255516/1113/CCS|F;size=1_at_365_ITS2_reversed_no_834	m312443/803/CCS|F;size=1	m255516/1113/CCS|F;size=1	365	ITS2	no	597	585	597	0.624
chimera_m187585/1324/CCS|F;size=1_and_m201113/870/CCS|F;size=1_at_316_ITS2_reversed_no_835	m187585/1324/CCS|F;size=1	m201113/870/CCS|F;size=1	316	ITS2	no	550	548	550	0.577
chimera_m428958/507/CCS|F;size=1_and_m220816/1706/CCS|F;size=2_at_113_ITS1_reversed_no_836	m428958/507/CCS|F;size=1	m220816/1706/CCS|F;size=2	113	ITS1	no	496	507	496	0.223
chimera_m251021/1013/CCS|F;size=1_and_m126864/1514/CCS|F;size=1_at_310_ITS2_reversed_no_837	m251021/1013/CCS|F;size=1	m126864/1514/CCS|F;size=1	310	ITS2	no	522	528	522	0.587
chimera_m86337/516/CCS|F;size=1_and_m319985/1046/CCS|F;size=1_at_367_ITS2_reversed_no_838	m86337/516/CCS|F;size=1	m319985/1046/CCS|F;size=1	367	ITS2	no	679	516	679	0.711
chimera_m102971/1210/CCS|F;size=1_and_m59900/665/CCS|F;size=1_at_391_ITS2_reversed_no_839	m102971/1210/CCS|F;size=1	m59900/665/CCS|F;size=1	391	ITS2	no	450	495	450	0.79
chimera_m418830/961/CCS|F;size=1_and_m105377/945/CCS|F;size=1_at_80_ITS1_reversed_no_840	m418830/961/CCS|F;size=1	m105377/945/CCS|F;size=1	80	ITS1	no	421	679	421	0.118
chimera_m179664/570/CCS|F;size=1_and_m259963/887/CCS|F;size=1_at_101_ITS1_reversed_no_841	m179664/570/CCS|F;size=1	m259963/887/CCS|F;size=1	101	ITS1	no	648	570	648	0.177
chimera_m302054/608/CCS|F;size=1_and_m226721/739/CCS|F;size=1_at_177_ITS1_reversed_no_842	m302054/608/CCS|F;size=1	m226721/739/CCS|F;size=1	177	ITS1	no	481	608	481	0.291
chimera_m136988/940/CCS|F;size=1_and_m117570/616/CCS|F;size=1_at_138_ITS1_reversed_no_843	m136988/940/CCS|F;size=1	m117570/616/CCS|F;size=1	138	ITS1	no	414	425	414	0.325
chimera_m52568/387/CCS|F;size=1_and_m10235/1755/CCS|F;size=1_at_127_ITS1_reversed_no_844	m52568/387/CCS|F;size=1	m10235/1755/CCS|F;size=1	127	ITS1	no	580	387	580	0.328
chimera_m252451/1079/CCS|F;size=1_and_m364530/768/CCS|T;size=1_at_220_ITS1_reversed_yes_845	m252451/1079/CCS|F;size=1	m364530/768/CCS|T;size=1	220	ITS1	yes	418	669	418	0.329
chimera_m207344/415/CCS|F;size=1_and_m252644/1160/CCS|F;size=1_at_328_ITS2_reversed_no_846	m207344/415/CCS|F;size=1	m252644/1160/CCS|F;size=1	328	ITS2	no	531	415	531	0.79
chimera_m15517/991/CCS|F;size=1_and_m137819/1356/CCS|F;size=1_at_307_ITS2_reversed_no_847	m15517/991/CCS|F;size=1	m137819/1356/CCS|F;size=1	307	ITS2	no	575	480	575	0.64
chimera_m326456/1194/CCS|F;size=1_and_m120624/811/CCS|F;size=1_at_302_ITS2_reversed_no_848	m326456/1194/CCS|F;size=1	m120624/811/CCS|F;size=1	302	ITS2	no	491	464	491	0.651
chimera_m168051/770/CCS|F;size=1_and_m360724/640/CCS|F;size=2_at_68_ITS1_reversed_no_849	m168051/770/CCS|F;size=1	m360724/640/CCS|F;size=2	68	ITS1	no	441	405	441	0.168
chimera_m53061/1496/CCS|F;size=1_and_m38344/1219/CCS|F;size=1_at_344_ITS2_reversed_no_850	m53061/1496/CCS|F;size=1	m38344/1219/CCS|F;size=1	344	ITS2	no	560	582	560	0.591
chimera_m164885/985/CCS|F;size=1_and_m221303/1104/CCS|F;size=1_at_108_ITS1_reversed_no_851	m164885/985/CCS|F;size=1	m221303/1104/CCS|F;size=1	108	ITS1	no	1013	687	1013	0.157
chimera_m164346/568/CCS|F;size=1_and_m23003/1168/CCS|F;size=1_at_253_ITS2_reversed_no_852	m164346/568/CCS|F;size=1	m23003/1168/CCS|F;size=1	253	ITS2	no	596	433	596	0.584
chimera_m185664/839/CCS|F;size=1_and_m55383/1171/CCS|F;size=2_at_386_ITS2_reversed_no_853	m185664/839/CCS|F;size=1	m55383/1171/CCS|F;size=2	386	ITS2	no	529	560	529	0.689
chimera_m311728/794/CCS|F;size=1_and_m171971/546/CCS|F;size=1_at_375_ITS2_reversed_no_854	m311728/794/CCS|F;size=1	m171971/546/CCS|F;size=1	375	ITS2	no	546	503	546	0.746
chimera_m156858/1346/CCS|F;size=1_and_m193336/1067/CCS|F;size=1_at_568_ITS2_reversed_no_855	m156858/1346/CCS|F;size=1	m193336/1067/CCS|F;size=1	568	ITS2	no	568	853	520	0.666
chimera_m123539/1081/CCS|F;size=1_and_m166718/1134/CCS|F;size=2_at_454_ITS2_reversed_no_856	m123539/1081/CCS|F;size=1	m166718/1134/CCS|F;size=2	454	ITS2	no	623	655	623	0.693
chimera_m250822/1034/CCS|F;size=1_and_m73795/632/CCS|F;size=1_at_248_5.8S_reversed_yes_857	m250822/1034/CCS|F;size=1	m73795/632/CCS|F;size=1	248	5.8S	yes	509	602	509	0.412
chimera_m84217/1035/CCS|F;size=1_and_m41616/695/CCS|F;size=1_at_377_ITS2_reversed_no_858	m84217/1035/CCS|F;size=1	m41616/695/CCS|F;size=1	377	ITS2	no	528	481	528	0.784
chimera_m42177/1082/CCS|F;size=1_and_m123105/507/CCS|F;size=1_at_447_ITS2_reversed_no_859	m42177/1082/CCS|F;size=1	m123105/507/CCS|F;size=1	447	ITS2	no	447	655	435	0.682
chimera_m25944/1591/CCS|F;size=1_and_m324228/1161/CCS|F;size=1_at_110_ITS1_reversed_no_860	m25944/1591/CCS|F;size=1	m324228/1161/CCS|F;size=1	110	ITS1	no	598	379	598	0.29
chimera_m69008/467/CCS|F;size=1_and_m48433/386/CCS|F;size=1_at_97_ITS1_reversed_no_861	m69008/467/CCS|F;size=1	m48433/386/CCS|F;size=1	97	ITS1	no	386	467	386	0.208
chimera_m23420/1218/CCS|F;size=1_and_m108615/648/CCS|F;size=1_at_421_ITS2_reversed_no_862	m23420/1218/CCS|F;size=1	m108615/648/CCS|F;size=1	421	ITS2	no	428	560	428	0.752
chimera_m80171/1811/CCS|F;size=1_and_m207873/1398/CCS|F;size=1_at_288_5.8S_reversed_no_863	m80171/1811/CCS|F;size=1	m207873/1398/CCS|F;size=1	288	5.8S	no	520	622	520	0.463
chimera_m149516/969/CCS|F;size=1_and_m209635/902/CCS|F;size=1_at_170_ITS1_reversed_no_864	m149516/969/CCS|F;size=1	m209635/902/CCS|F;size=1	170	ITS1	no	626	534	626	0.318
chimera_m223708/1168/CCS|F;size=1_and_m245330/563/CCS|F;size=1_at_76_ITS1_reversed_no_865	m223708/1168/CCS|F;size=1	m245330/563/CCS|F;size=1	76	ITS1	no	468	494	468	0.154
chimera_m57684/1651/CCS|F;size=1_and_m235154/580/CCS|F;size=1_at_168_ITS1_reversed_no_866	m57684/1651/CCS|F;size=1	m235154/580/CCS|F;size=1	168	ITS1	no	496	527	496	0.319
chimera_m136454/738/CCS|F;size=1_and_m63133/495/CCS|F;size=1_at_154_ITS1_reversed_yes_867	m136454/738/CCS|F;size=1	m63133/495/CCS|F;size=1	154	ITS1	yes	495	529	495	0.291
chimera_m233903/888/CCS|F;size=1_and_m45559/1003/CCS|F;size=2_at_365_ITS2_reversed_no_868	m233903/888/CCS|F;size=1	m45559/1003/CCS|F;size=2	365	ITS2	no	496	445	496	0.82
chimera_m162971/1105/CCS|F;size=1_and_m178518/761/CCS|F;size=1_at_186_5.8S_reversed_no_869	m162971/1105/CCS|F;size=1	m178518/761/CCS|F;size=1	186	5.8S	no	481	527	481	0.353
chimera_m173686/576/CCS|F;size=1_and_m88761/1068/CCS|F;size=1_at_97_ITS1_reversed_no_870	m173686/576/CCS|F;size=1	m88761/1068/CCS|F;size=1	97	ITS1	no	578	551	578	0.176
chimera_m74232/615/CCS|F;size=1_and_m393150/1020/CCS|F;size=1_at_262_ITS2_reversed_no_871	m74232/615/CCS|F;size=1	m393150/1020/CCS|F;size=1	262	ITS2	no	682	495	682	0.529
chimera_m44766/847/CCS|F;size=1_and_m179509/1193/CCS|F;size=1_at_315_ITS2_reversed_no_872	m44766/847/CCS|F;size=1	m179509/1193/CCS|F;size=1	315	ITS2	no	414	400	414	0.787
chimera_m194636/1347/CCS|F;size=1_and_m375534/537/CCS|F;size=1_at_278_ITS2_reversed_no_873	m194636/1347/CCS|F;size=1	m375534/537/CCS|F;size=1	278	ITS2	no	537	492	537	0.565
chimera_m244538/975/CCS|F;size=1_and_m51216/583/CCS|F;size=1_at_182_ITS1_reversed_no_874	m244538/975/CCS|F;size=1	m51216/583/CCS|F;size=1	182	ITS1	no	583	520	583	0.35
chimera_m464744/1004/CCS|F;size=1_and_m127289/476/CCS|F;size=1_at_139_ITS1_reversed_no_875	m464744/1004/CCS|F;size=1	m127289/476/CCS|F;size=1	139	ITS1	no	403	642	403	0.217
chimera_m75409/600/CCS|F;size=1_and_m148249/364/CCS|F;size=1_at_221_5.8S_reversed_no_876	m75409/600/CCS|F;size=1	m148249/364/CCS|F;size=1	221	5.8S	no	364	600	364	0.368
chimera_m389552/1270/CCS|F;size=1_and_m336694/1373/CCS|F;size=1_at_211_ITS1_reversed_no_877	m389552/1270/CCS|F;size=1	m336694/1373/CCS|F;size=1	211	ITS1	no	462	676	462	0.312
chimera_m266920/734/CCS|F;size=1_and_m92559/770/CCS|F;size=1_at_337_ITS2_reversed_no_878	m266920/734/CCS|F;size=1	m92559/770/CCS|F;size=1	337	ITS2	no	496	547	496	0.616
chimera_m28554/1611/CCS|F;size=1_and_m196888/673/CCS|F;size=1_at_343_ITS2_reversed_no_879	m28554/1611/CCS|F;size=1	m196888/673/CCS|F;size=1	343	ITS2	no	587	568	587	0.604
chimera_m208049/1016/CCS|F;size=1_and_m336049/864/CCS|F;size=1_at_371_ITS2_reversed_no_880	m208049/1016/CCS|F;size=1	m336049/864/CCS|F;size=1	371	ITS2	no	566	590	566	0.629
chimera_m228145/698/CCS|F;size=1_and_m435752/1094/CCS|F;size=1_at_123_ITS1_reversed_no_881	m228145/698/CCS|F;size=1	m435752/1094/CCS|F;size=1	123	ITS1	no	737	452	737	0.272
chimera_m33214/638/CCS|F;size=1_and_m481986/516/CCS|F;size=1_at_461_ITS2_reversed_no_882	m33214/638/CCS|F;size=1	m481986/516/CCS|F;size=1	461	ITS2	no	516	530	516	0.87
chimera_m159688/498/CCS|F;size=1_and_m264401/1515/CCS|F;size=2_at_266_ITS2_reversed_no_883	m159688/498/CCS|F;size=1	m264401/1515/CCS|F;size=2	266	ITS2	no	616	498	616	0.534
chimera_m193908/822/CCS|F;size=1_and_m2653/1150/CCS|F;size=1_at_228_5.8S_reversed_no_884	m193908/822/CCS|F;size=1	m2653/1150/CCS|F;size=1	228	5.8S	no	473	479	473	0.476
chimera_m185871/1412/CCS|F;size=1_and_m183556/1128/CCS|F;size=1_at_111_ITS1_reversed_no_885	m185871/1412/CCS|F;size=1	m183556/1128/CCS|F;size=1	111	ITS1	no	618	575	618	0.193
chimera_m180097/1204/CCS|F;size=1_and_m125742/1500/CCS|F;size=1_at_316_ITS2_reversed_no_886	m180097/1204/CCS|F;size=1	m125742/1500/CCS|F;size=1	316	ITS2	no	628	473	628	0.668
chimera_m69783/1171/CCS|F;size=1_and_m129291/630/CCS|F;size=1_at_107_ITS1_reversed_yes_887	m69783/1171/CCS|F;size=1	m129291/630/CCS|F;size=1	107	ITS1	yes	630	624	630	0.171
chimera_m231007/760/CCS|F;size=1_and_m314093/1286/CCS|F;size=1_at_66_ITS1_reversed_no_888	m231007/760/CCS|F;size=1	m314093/1286/CCS|F;size=1	66	ITS1	no	511	506	511	0.13
chimera_m149941/928/CCS|F;size=1_and_m23798/1150/CCS|F;size=1_at_107_ITS1_reversed_no_889	m149941/928/CCS|F;size=1	m23798/1150/CCS|F;size=1	107	ITS1	no	561	462	561	0.232
chimera_m222366/655/CCS|F;size=1_and_m353746/662/CCS|F;size=1_at_325_ITS2_reversed_no_890	m222366/655/CCS|F;size=1	m353746/662/CCS|F;size=1	325	ITS2	no	547	524	547	0.62
chimera_m128030/544/CCS|F;size=1_and_m116218/1443/CCS|F;size=1_at_223_ITS2_reversed_no_891	m128030/544/CCS|F;size=1	m116218/1443/CCS|F;size=1	223	ITS2	no	547	452	547	0.493
chimera_m139852/1205/CCS|F;size=1_and_m52371/1073/CCS|F;size=1_at_411_ITS2_reversed_no_892	m139852/1205/CCS|F;size=1	m52371/1073/CCS|F;size=1	411	ITS2	no	578	501	578	0.82
chimera_m262864/1004/CCS|T;size=1_and_m1462/1463/CCS|F;size=91_at_131_ITS1_reversed_yes_893	m262864/1004/CCS|T;size=1	m1462/1463/CCS|F;size=91	131	ITS1	yes	590	470	590	0.279
chimera_m11029/422/CCS|F;size=1_and_m56892/1196/CCS|F;size=1_at_80_ITS1_reversed_no_894	m11029/422/CCS|F;size=1	m56892/1196/CCS|F;size=1	80	ITS1	no	546	422	546	0.19
chimera_m252153/435/CCS|F;size=1_and_m340280/640/CCS|F;size=1_at_79_ITS1_reversed_no_895	m252153/435/CCS|F;size=1	m340280/640/CCS|F;size=1	79	ITS1	no	507	435	507	0.182
chimera_m100156/722/CCS|F;size=1_and_m4187/1166/CCS|F;size=1_at_397_ITS2_reversed_no_896	m100156/722/CCS|F;size=1	m4187/1166/CCS|F;size=1	397	ITS2	no	476	607	476	0.654
chimera_m36112/932/CCS|F;size=2_and_m46910/676/CCS|F;size=1_at_69_ITS1_reversed_no_897	m36112/932/CCS|F;size=2	m46910/676/CCS|F;size=1	69	ITS1	no	581	443	581	0.156
chimera_m283919/789/CCS|F;size=1_and_m131403/910/CCS|F;size=1_at_101_ITS1_reversed_no_898	m283919/789/CCS|F;size=1	m131403/910/CCS|F;size=1	101	ITS1	no	718	463	718	0.218
chimera_m76632/1473/CCS|F;size=1_and_m229040/616/CCS|F;size=1_at_178_ITS1_reversed_yes_899	m76632/1473/CCS|F;size=1	m229040/616/CCS|F;size=1	178	ITS1	yes	534	547	534	0.325
chimera_m290458/1097/CCS|F;size=1_and_m185664/839/CCS|F;size=1_at_295_ITS2_reversed_no_900	m290458/1097/CCS|F;size=1	m185664/839/CCS|F;size=1	295	ITS2	no	560	580	560	0.509
chimera_m167058/452/CCS|F;size=1_and_m407735/1133/CCS|F;size=1_at_344_ITS2_reversed_no_901	m167058/452/CCS|F;size=1	m407735/1133/CCS|F;size=1	344	ITS2	no	443	423	443	0.813
chimera_m268524/556/CCS|F;size=1_and_m2834/950/CCS|F;size=1_at_369_ITS2_reversed_no_902	m268524/556/CCS|F;size=1	m2834/950/CCS|F;size=1	369	ITS2	no	570	509	570	0.725
chimera_m104478/506/CCS|F;size=1_and_m222566/540/CCS|F;size=2_at_141_ITS1_reversed_no_903	m104478/506/CCS|F;size=1	m222566/540/CCS|F;size=2	141	ITS1	no	432	465	432	0.303
chimera_m468832/1798/CCS|F;size=1_and_m287916/1299/CCS|F;size=1_at_726_ITS2_reversed_no_904	m468832/1798/CCS|F;size=1	m287916/1299/CCS|F;size=1	726	ITS2	no	726	987	647	0.736
chimera_m224440/843/CCS|F;size=1_and_m129060/316/CCS|F;size=1_at_147_ITS1_reversed_no_905	m224440/843/CCS|F;size=1	m129060/316/CCS|F;size=1	147	ITS1	no	316	520	316	0.283
chimera_m118372/612/CCS|F;size=2_and_m26083/948/CCS|F;size=1_at_397_ITS2_reversed_no_906	m118372/612/CCS|F;size=2	m26083/948/CCS|F;size=1	397	ITS2	no	441	572	441	0.694
chimera_m243054/1235/CCS|F;size=1_and_m190288/1203/CCS|F;size=1_at_267_ITS2_reversed_no_907	m243054/1235/CCS|F;size=1	m190288/1203/CCS|F;size=1	267	ITS2	no	527	462	527	0.578
chimera_m207456/958/CCS|F;size=13_and_m263961/1152/CCS|F;size=1_at_391_ITS2_reversed_no_908	m207456/958/CCS|F;size=13	m263961/1152/CCS|F;size=1	391	ITS2	no	709	618	709	0.633
chimera_m17244/659/CCS|F;size=1_and_m87464/771/CCS|F;size=1_at_39_ITS1_reversed_no_909	m17244/659/CCS|F;size=1	m87464/771/CCS|F;size=1	39	ITS1	no	437	462	437	0.084
chimera_m160114/1034/CCS|F;size=1_and_m329274/1259/CCS|F;size=1_at_390_ITS2_reversed_no_910	m160114/1034/CCS|F;size=1	m329274/1259/CCS|F;size=1	390	ITS2	no	644	563	644	0.693
chimera_m132989/1756/CCS|F;size=1_and_m128110/1246/CCS|F;size=1_at_435_ITS2_reversed_no_911	m132989/1756/CCS|F;size=1	m128110/1246/CCS|F;size=1	435	ITS2	no	500	626	500	0.695
chimera_m53031/1386/CCS|F;size=2_and_m435616/1031/CCS|F;size=1_at_345_ITS2_reversed_no_912	m53031/1386/CCS|F;size=2	m435616/1031/CCS|F;size=1	345	ITS2	no	621	541	621	0.638
chimera_m897/1590/CCS|F;size=1_and_m359485/631/CCS|F;size=1_at_256_ITS1_reversed_yes_913	m897/1590/CCS|F;size=1	m359485/631/CCS|F;size=1	256	ITS1	yes	631	744	631	0.344
chimera_m2635/1264/CCS|F;size=1_and_m272187/1067/CCS|F;size=1_at_453_ITS2_reversed_no_914	m2635/1264/CCS|F;size=1	m272187/1067/CCS|F;size=1	453	ITS2	no	504	645	504	0.702
chimera_m214091/1044/CCS|F;size=1_and_m46838/1501/CCS|F;size=2_at_236_5.8S_reversed_no_915	m214091/1044/CCS|F;size=1	m46838/1501/CCS|F;size=2	236	5.8S	no	588	597	588	0.395
chimera_m33876/600/CCS|F;size=1_and_m15727/611/CCS|F;size=2_at_114_ITS1_reversed_no_916	m33876/600/CCS|F;size=1	m15727/611/CCS|F;size=2	114	ITS1	no	503	408	503	0.279
chimera_m64725/765/CCS|F;size=1_and_m141971/871/CCS|F;size=1_at_146_ITS1_reversed_no_917	m64725/765/CCS|F;size=1	m141971/871/CCS|F;size=1	146	ITS1	no	603	545	603	0.268
chimera_m90012/418/CCS|F;size=1_and_m177340/385/CCS|F;size=1_at_95_ITS1_reversed_no_918	m90012/418/CCS|F;size=1	m177340/385/CCS|F;size=1	95	ITS1	no	385	418	385	0.227
chimera_m71229/471/CCS|F;size=1_and_m118944/961/CCS|F;size=1_at_111_ITS1_reversed_yes_919	m71229/471/CCS|F;size=1	m118944/961/CCS|F;size=1	111	ITS1	yes	429	471	429	0.236
chimera_m155357/1158/CCS|F;size=1_and_m173829/1187/CCS|F;size=1_at_353_ITS2_reversed_no_920	m155357/1158/CCS|F;size=1	m173829/1187/CCS|F;size=1	353	ITS2	no	520	649	520	0.544
chimera_m197800/966/CCS|F;size=1_and_m102579/1307/CCS|F;size=1_at_153_ITS1_reversed_no_921	m197800/966/CCS|F;size=1	m102579/1307/CCS|F;size=1	153	ITS1	no	520	527	520	0.29
chimera_m153178/519/CCS|F;size=1_and_m75979/1210/CCS|F;size=1_at_128_ITS1_reversed_no_922	m153178/519/CCS|F;size=1	m75979/1210/CCS|F;size=1	128	ITS1	no	556	519	556	0.247
chimera_m109119/836/CCS|F;size=1_and_m343224/1561/CCS|F;size=1_at_225_ITS2_reversed_no_923	m109119/836/CCS|F;size=1	m343224/1561/CCS|F;size=1	225	ITS2	no	570	417	570	0.54
chimera_m278484/981/CCS|F;size=1_and_m142200/1694/CCS|F;size=1_at_121_ITS1_reversed_no_924	m278484/981/CCS|F;size=1	m142200/1694/CCS|F;size=1	121	ITS1	no	533	567	533	0.213
chimera_m145050/1317/CCS|F;size=1_and_m84247/540/CCS|F;size=1_at_98_ITS1_reversed_no_925	m145050/1317/CCS|F;size=1	m84247/540/CCS|F;size=1	98	ITS1	no	484	537	484	0.182
chimera_m4435/319/CCS|F;size=1_and_m88837/883/CCS|F;size=2_at_75_ITS1_reversed_no_926	m4435/319/CCS|F;size=1	m88837/883/CCS|F;size=2	75	ITS1	no	506	319	506	0.235
chimera_m226169/658/CCS|F;size=1_and_m174419/475/CCS|F;size=1_at_82_ITS1_reversed_no_927	m226169/658/CCS|F;size=1	m174419/475/CCS|F;size=1	82	ITS1	no	475	432	475	0.19
chimera_m102638/1718/CCS|F;size=1_and_m220761/1397/CCS|F;size=1_at_393_ITS2_reversed_no_928	m102638/1718/CCS|F;size=1	m220761/1397/CCS|F;size=1	393	ITS2	no	712	512	712	0.768
chimera_m90388/1322/CCS|F;size=1_and_m284557/752/CCS|F;size=1_at_173_ITS1_reversed_yes_929	m90388/1322/CCS|F;size=1	m284557/752/CCS|F;size=1	173	ITS1	yes	501	602	501	0.287
chimera_m69979/619/CCS|F;size=1_and_m288019/1196/CCS|F;size=1_at_85_ITS1_reversed_no_930	m69979/619/CCS|F;size=1	m288019/1196/CCS|F;size=1	85	ITS1	no	650	549	650	0.155
chimera_m223012/297/CCS|F;size=1_and_m371444/554/CCS|F;size=1_at_177_ITS2_reversed_no_931	m223012/297/CCS|F;size=1	m371444/554/CCS|F;size=1	177	ITS2	no	442	297	442	0.596
chimera_m5482/830/CCS|F;size=1_and_m398732/379/CCS|F;size=1_at_261_ITS2_reversed_no_932	m5482/830/CCS|F;size=1	m398732/379/CCS|F;size=1	261	ITS2	no	379	500	379	0.522
chimera_m136363/1294/CCS|F;size=1_and_m216917/1090/CCS|F;size=1_at_186_5.8S_reversed_no_933	m136363/1294/CCS|F;size=1	m216917/1090/CCS|F;size=1	186	5.8S	no	454	482	454	0.386
chimera_m130583/648/CCS|F;size=1_and_m155752/851/CCS|F;size=1_at_243_ITS2_reversed_no_934	m130583/648/CCS|F;size=1	m155752/851/CCS|F;size=1	243	ITS2	no	612	440	612	0.552
chimera_m59616/1001/CCS|F;size=1_and_m167425/1146/CCS|F;size=1_at_396_ITS2_reversed_no_935	m59616/1001/CCS|F;size=1	m167425/1146/CCS|F;size=1	396	ITS2	no	489	444	489	0.892
chimera_m61922/415/CCS|F;size=1_and_m38720/1407/CCS|F;size=1_at_71_ITS1_reversed_no_936	m61922/415/CCS|F;size=1	m38720/1407/CCS|F;size=1	71	ITS1	no	483	415	483	0.171
chimera_m142113/957/CCS|F;size=2_and_m256631/475/CCS|F;size=1_at_276_ITS2_reversed_no_937	m142113/957/CCS|F;size=2	m256631/475/CCS|F;size=1	276	ITS2	no	475	455	475	0.607
chimera_m28909/512/CCS|F;size=1_and_m233895/1639/CCS|F;size=1_at_308_ITS2_reversed_no_938	m28909/512/CCS|F;size=1	m233895/1639/CCS|F;size=1	308	ITS2	no	604	512	604	0.602
chimera_m109413/783/CCS|F;size=1_and_m259379/1607/CCS|F;size=1_at_382_ITS2_reversed_no_939	m109413/783/CCS|F;size=1	m259379/1607/CCS|F;size=1	382	ITS2	no	701	522	701	0.732
chimera_m109767/542/CCS|F;size=1_and_m115906/528/CCS|F;size=1_at_418_ITS2_reversed_no_940	m109767/542/CCS|F;size=1	m115906/528/CCS|F;size=1	418	ITS2	no	418	542	413	0.771
chimera_m184426/683/CCS|F;size=1_and_m70393/1456/CCS|F;size=1_at_90_ITS1_reversed_no_941	m184426/683/CCS|F;size=1	m70393/1456/CCS|F;size=1	90	ITS1	no	534	439	534	0.205
chimera_m277449/933/CCS|F;size=1_and_m193693/755/CCS|F;size=1_at_347_ITS2_reversed_no_942	m277449/933/CCS|F;size=1	m193693/755/CCS|F;size=1	347	ITS2	no	461	566	461	0.613
chimera_m201597/877/CCS|F;size=1_and_m76738/1074/CCS|F;size=2_at_152_ITS1_reversed_no_943	m201597/877/CCS|F;size=1	m76738/1074/CCS|F;size=2	152	ITS1	no	503	573	503	0.265
chimera_m323685/1940/CCS|F;size=1_and_m218174/580/CCS|F;size=1_at_433_ITS2_reversed_no_944	m323685/1940/CCS|F;size=1	m218174/580/CCS|F;size=1	433	ITS2	no	494	637	494	0.68
chimera_m280823/1276/CCS|F;size=1_and_m467080/1079/CCS|F;size=1_at_192_ITS1_reversed_no_945	m280823/1276/CCS|F;size=1	m467080/1079/CCS|F;size=1	192	ITS1	no	815	689	815	0.279
chimera_m13159/572/CCS|F;size=1_and_m218801/1750/CCS|F;size=1_at_109_ITS1_reversed_no_946	m13159/572/CCS|F;size=1	m218801/1750/CCS|F;size=1	109	ITS1	no	529	504	529	0.216
chimera_m122561/551/CCS|F;size=1_and_m144967/357/CCS|F;size=1_at_85_ITS1_reversed_no_947	m122561/551/CCS|F;size=1	m144967/357/CCS|F;size=1	85	ITS1	no	357	493	357	0.172
chimera_m189442/1246/CCS|F;size=1_and_m152173/1244/CCS|F;size=1_at_34_ITS1_reversed_yes_948	m189442/1246/CCS|F;size=1	m152173/1244/CCS|F;size=1	34	ITS1	yes	492	620	492	0.055
chimera_m77848/509/CCS|F;size=1_and_m200733/852/CCS|F;size=1_at_256_ITS2_reversed_no_949	m77848/509/CCS|F;size=1	m200733/852/CCS|F;size=1	256	ITS2	no	498	509	498	0.503
chimera_m34485/945/CCS|F;size=1_and_m106626/573/CCS|F;size=1_at_120_ITS1_reversed_no_950	m34485/945/CCS|F;size=1	m106626/573/CCS|F;size=1	120	ITS1	no	573	612	573	0.196
chimera_m17965/1597/CCS|F;size=1_and_m132664/605/CCS|F;size=1_at_126_ITS1_reversed_no_951	m17965/1597/CCS|F;size=1	m132664/605/CCS|F;size=1	126	ITS1	no	448	482	448	0.261
chimera_m18124/745/CCS|F;size=1_and_m83688/1225/CCS|F;size=1_at_301_ITS2_reversed_no_952	m18124/745/CCS|F;size=1	m83688/1225/CCS|F;size=1	301	ITS2	no	592	504	592	0.597
chimera_m378777/1117/CCS|F;size=1_and_m41992/2036/CCS|F;size=1_at_392_ITS2_reversed_no_953	m378777/1117/CCS|F;size=1	m41992/2036/CCS|F;size=1	392	ITS2	no	577	559	577	0.701
chimera_m272190/1115/CCS|F;size=1_and_m57969/1355/CCS|F;size=1_at_422_ITS2_reversed_no_954	m272190/1115/CCS|F;size=1	m57969/1355/CCS|F;size=1	422	ITS2	no	621	589	621	0.716
chimera_m210808/1051/CCS|F;size=1_and_m103023/608/CCS|F;size=1_at_208_ITS2_reversed_no_955	m210808/1051/CCS|F;size=1	m103023/608/CCS|F;size=1	208	ITS2	no	571	405	571	0.514
chimera_m222395/755/CCS|F;size=1_and_m374537/1965/CCS|F;size=1_at_394_ITS2_reversed_yes_956	m222395/755/CCS|F;size=1	m374537/1965/CCS|F;size=1	394	ITS2	yes	538	588	538	0.67
chimera_m31279/1387/CCS|F;size=1_and_m149510/950/CCS|F;size=2_at_124_ITS1_reversed_no_957	m31279/1387/CCS|F;size=1	m149510/950/CCS|F;size=2	124	ITS1	no	653	506	653	0.245
chimera_m25280/708/CCS|F;size=2_and_m203029/1151/CCS|F;size=1_at_479_ITS2_reversed_no_958	m25280/708/CCS|F;size=2	m203029/1151/CCS|F;size=1	479	ITS2	no	506	532	506	0.9
chimera_m345737/1301/CCS|F;size=1_and_m171723/1358/CCS|F;size=1_at_428_ITS2_reversed_no_959	m345737/1301/CCS|F;size=1	m171723/1358/CCS|F;size=1	428	ITS2	no	469	752	469	0.569
chimera_m173204/1092/CCS|F;size=1_and_m322804/381/CCS|F;size=1_at_248_ITS2_reversed_yes_960	m173204/1092/CCS|F;size=1	m322804/381/CCS|F;size=1	248	ITS2	yes	381	444	381	0.559
chimera_m123857/1627/CCS|F;size=1_and_m251183/815/CCS|F;size=1_at_121_ITS1_reversed_no_961	m123857/1627/CCS|F;size=1	m251183/815/CCS|F;size=1	121	ITS1	no	399	414	399	0.292
chimera_m121737/912/CCS|F;size=1_and_m208223/1465/CCS|F;size=1_at_175_ITS1_reversed_no_962	m121737/912/CCS|F;size=1	m208223/1465/CCS|F;size=1	175	ITS1	no	583	567	583	0.309
chimera_m57236/755/CCS|F;size=1_and_m154072/1306/CCS|F;size=1_at_351_ITS2_reversed_no_963	m57236/755/CCS|F;size=1	m154072/1306/CCS|F;size=1	351	ITS2	no	547	558	547	0.629
chimera_m196203/515/CCS|F;size=1_and_m47071/615/CCS|F;size=1_at_136_ITS1_reversed_no_964	m196203/515/CCS|F;size=1	m47071/615/CCS|F;size=1	136	ITS1	no	524	515	524	0.264
chimera_m67692/882/CCS|F;size=1_and_m147784/1325/CCS|F;size=1_at_340_ITS2_reversed_no_965	m67692/882/CCS|F;size=1	m147784/1325/CCS|F;size=1	340	ITS2	no	647	428	647	0.794
chimera_m323748/771/CCS|F;size=1_and_m151158/326/CCS|F;size=1_at_163_ITS1_reversed_no_966	m323748/771/CCS|F;size=1	m151158/326/CCS|F;size=1	163	ITS1	no	326	523	326	0.312
chimera_m142809/1236/CCS|F;size=1_and_m252573/1820/CCS|F;size=1_at_327_ITS2_reversed_no_967	m142809/1236/CCS|F;size=1	m252573/1820/CCS|F;size=1	327	ITS2	no	686	521	686	0.628
chimera_m30053/1240/CCS|F;size=1_and_m192171/1348/CCS|F;size=1_at_129_ITS1_reversed_no_968	m30053/1240/CCS|F;size=1	m192171/1348/CCS|F;size=1	129	ITS1	no	522	510	522	0.253
chimera_m74981/789/CCS|F;size=1_and_m227942/1350/CCS|F;size=1_at_148_ITS1_reversed_no_969	m74981/789/CCS|F;size=1	m227942/1350/CCS|F;size=1	148	ITS1	no	527	531	527	0.279
chimera_m140875/802/CCS|F;size=1_and_m14797/928/CCS|F;size=1_at_35_ITS1_reversed_no_970	m140875/802/CCS|F;size=1	m14797/928/CCS|F;size=1	35	ITS1	no	525	544	525	0.064
chimera_m268421/416/CCS|F;size=1_and_m58843/1692/CCS|F;size=1_at_110_ITS1_reversed_no_971	m268421/416/CCS|F;size=1	m58843/1692/CCS|F;size=1	110	ITS1	no	574	416	574	0.264
chimera_m385709/555/CCS|F;size=1_and_m11087/704/CCS|F;size=1_at_74_ITS1_reversed_no_972	m385709/555/CCS|F;size=1	m11087/704/CCS|F;size=1	74	ITS1	no	651	429	651	0.172
chimera_m225607/1074/CCS|F;size=1_and_m122749/1378/CCS|F;size=1_at_124_ITS1_reversed_no_973	m225607/1074/CCS|F;size=1	m122749/1378/CCS|F;size=1	124	ITS1	no	586	531	586	0.234
chimera_m26533/1669/CCS|F;size=1_and_m101599/909/CCS|F;size=1_at_302_ITS2_reversed_no_974	m26533/1669/CCS|F;size=1	m101599/909/CCS|F;size=1	302	ITS2	no	473	526	473	0.574
chimera_m56608/667/CCS|F;size=1_and_m100068/1026/CCS|F;size=1_at_258_ITS2_reversed_no_975	m56608/667/CCS|F;size=1	m100068/1026/CCS|F;size=1	258	ITS2	no	524	424	524	0.608
chimera_m78719/1176/CCS|F;size=1_and_m108846/568/CCS|F;size=1_at_316_ITS2_reversed_no_976	m78719/1176/CCS|F;size=1	m108846/568/CCS|F;size=1	316	ITS2	no	431	444	431	0.712
chimera_m29351/769/CCS|F;size=1_and_m36428/685/CCS|F;size=1_at_354_ITS2_reversed_no_977	m29351/769/CCS|F;size=1	m36428/685/CCS|F;size=1	354	ITS2	no	631	516	631	0.686
chimera_m65115/610/CCS|F;size=1_and_m154868/1167/CCS|F;size=1_at_64_ITS1_reversed_no_978	m65115/610/CCS|F;size=1	m154868/1167/CCS|F;size=1	64	ITS1	no	560	501	560	0.128
chimera_m291176/921/CCS|F;size=1_and_m156867/677/CCS|F;size=1_at_384_ITS2_reversed_no_979	m291176/921/CCS|F;size=1	m156867/677/CCS|F;size=1	384	ITS2	no	448	764	448	0.503
chimera_m333609/532/CCS|F;size=1_and_m109139/1479/CCS|F;size=1_at_413_ITS2_reversed_no_980	m333609/532/CCS|F;size=1	m109139/1479/CCS|F;size=1	413	ITS2	no	781	532	781	0.776
chimera_m87337/817/CCS|F;size=1_and_m30428/1184/CCS|F;size=1_at_261_ITS2_reversed_no_981	m87337/817/CCS|F;size=1	m30428/1184/CCS|F;size=1	261	ITS2	no	596	409	596	0.638
chimera_m79616/766/CCS|F;size=1_and_m136368/1182/CCS|F;size=1_at_286_5.8S_reversed_no_982	m79616/766/CCS|F;size=1	m136368/1182/CCS|F;size=1	286	5.8S	no	576	600	576	0.477
chimera_m325980/543/CCS|F;size=1_and_m436820/743/CCS|F;size=1_at_363_ITS2_reversed_no_983	m325980/543/CCS|F;size=1	m436820/743/CCS|F;size=1	363	ITS2	no	666	543	666	0.669
chimera_m228748/535/CCS|F;size=1_and_m404530/888/CCS|F;size=1_at_409_ITS2_reversed_no_984	m228748/535/CCS|F;size=1	m404530/888/CCS|F;size=1	409	ITS2	no	740	535	740	0.764
chimera_m129708/1048/CCS|F;size=1_and_m224557/740/CCS|F;size=1_at_129_ITS1_reversed_no_985	m129708/1048/CCS|F;size=1	m224557/740/CCS|F;size=1	129	ITS1	no	586	577	586	0.224
chimera_m36455/581/CCS|F;size=1_and_m20875/976/CCS|F;size=1_at_190_5.8S_reversed_no_986	m36455/581/CCS|F;size=1	m20875/976/CCS|F;size=1	190	5.8S	no	515	476	515	0.399
chimera_m187455/1708/CCS|F;size=1_and_m13628/1667/CCS|F;size=1_at_359_ITS2_reversed_no_987	m187455/1708/CCS|F;size=1	m13628/1667/CCS|F;size=1	359	ITS2	no	622	577	622	0.622
chimera_m47145/1786/CCS|F;size=1_and_m76924/412/CCS|F;size=1_at_120_ITS1_reversed_yes_988	m47145/1786/CCS|F;size=1	m76924/412/CCS|F;size=1	120	ITS1	yes	412	555	412	0.216
chimera_m208096/1276/CCS|F;size=1_and_m53460/695/CCS|F;size=1_at_118_ITS1_reversed_no_989	m208096/1276/CCS|F;size=1	m53460/695/CCS|F;size=1	118	ITS1	no	510	680	510	0.174
chimera_m243584/495/CCS|F;size=1_and_m167753/931/CCS|F;size=1_at_82_ITS1_reversed_no_990	m243584/495/CCS|F;size=1	m167753/931/CCS|F;size=1	82	ITS1	no	492	429	492	0.191
chimera_m83688/950/CCS|F;size=1_and_m109178/1450/CCS|F;size=1_at_238_ITS2_reversed_no_991	m83688/950/CCS|F;size=1	m109178/1450/CCS|F;size=1	238	ITS2	no	670	403	670	0.591
chimera_m128555/1687/CCS|F;size=1_and_m37990/590/CCS|F;size=1_at_106_ITS1_reversed_no_992	m128555/1687/CCS|F;size=1	m37990/590/CCS|F;size=1	106	ITS1	no	483	443	483	0.239
chimera_m41400/1452/CCS|F;size=1_and_m200537/770/CCS|F;size=1_at_290_ITS2_reversed_no_993	m41400/1452/CCS|F;size=1	m200537/770/CCS|F;size=1	290	ITS2	no	609	501	609	0.579
chimera_m78470/1102/CCS|F;size=1_and_m52456/735/CCS|F;size=1_at_335_ITS2_reversed_yes_994	m78470/1102/CCS|F;size=1	m52456/735/CCS|F;size=1	335	ITS2	yes	434	505	434	0.663
chimera_m221099/666/CCS|F;size=1_and_m242693/711/CCS|F;size=1_at_132_ITS1_reversed_no_995	m221099/666/CCS|F;size=1	m242693/711/CCS|F;size=1	132	ITS1	no	559	591	559	0.223
chimera_m30298/1061/CCS|F;size=2_and_m30053/1240/CCS|F;size=1_at_132_ITS1_reversed_no_996	m30298/1061/CCS|F;size=2	m30053/1240/CCS|F;size=1	132	ITS1	no	510	519	510	0.254
chimera_m150957/392/CCS|F;size=1_and_m163973/1047/CCS|F;size=1_at_79_ITS1_reversed_no_997	m150957/392/CCS|F;size=1	m163973/1047/CCS|F;size=1	79	ITS1	no	615	392	615	0.202
chimera_m288139/1584/CCS|F;size=1_and_m136983/1366/CCS|F;size=1_at_39_ITS1_reversed_no_998	m288139/1584/CCS|F;size=1	m136983/1366/CCS|F;size=1	39	ITS1	no	546	590	546	0.066
chimera_m13434/872/CCS|F;size=1_and_m3089/970/CCS|F;size=1_at_377_ITS2_reversed_no_999	m13434/872/CCS|F;size=1	m3089/970/CCS|F;size=1	377	ITS2	no	558	497	558	0.759
chimera_m32277/533/CCS|F;size=1_and_m283145/963/CCS|F;size=1_at_339_ITS2_reversed_no_1000	m32277/533/CCS|F;size=1	m283145/963/CCS|F;size=1	339	ITS2	no	568	464	568	0.731
chimera_m297340/1262/CCS|F;size=1_and_m162326/1330/CCS|F;size=1_at_385_ITS2_reversed_yes_1001	m297340/1262/CCS|F;size=1	m162326/1330/CCS|F;size=1	385	ITS2	yes	465	633	465	0.608
chimera_m6055/1571/CCS|F;size=1_and_m101812/497/CCS|F;size=1_at_585_ITS2_reversed_no_1002	m6055/1571/CCS|F;size=1	m101812/497/CCS|F;size=1	585	ITS2	no	585	713	497	0.82
chimera_m265790/1061/CCS|F;size=1_and_m118652/644/CCS|F;size=1_at_178_ITS1_reversed_no_1003	m265790/1061/CCS|F;size=1	m118652/644/CCS|F;size=1	178	ITS1	no	437	603	437	0.295
chimera_m179846/767/CCS|F;size=1_and_m123885/740/CCS|F;size=1_at_373_ITS2_reversed_yes_1004	m179846/767/CCS|F;size=1	m123885/740/CCS|F;size=1	373	ITS2	yes	555	475	555	0.785
chimera_m88002/681/CCS|F;size=1_and_m139188/713/CCS|F;size=1_at_351_ITS2_reversed_no_1005	m88002/681/CCS|F;size=1	m139188/713/CCS|F;size=1	351	ITS2	no	427	478	427	0.734
chimera_m298668/1427/CCS|F;size=1_and_m291512/1127/CCS|F;size=1_at_393_ITS2_reversed_no_1006	m298668/1427/CCS|F;size=1	m291512/1127/CCS|F;size=1	393	ITS2	no	408	603	408	0.652
chimera_m363721/1675/CCS|F;size=1_and_m12888/760/CCS|F;size=1_at_412_ITS2_reversed_no_1007	m363721/1675/CCS|F;size=1	m12888/760/CCS|F;size=1	412	ITS2	no	462	575	462	0.717
chimera_m150846/707/CCS|F;size=2_and_m62199/780/CCS|F;size=1_at_83_ITS1_reversed_no_1008	m150846/707/CCS|F;size=2	m62199/780/CCS|F;size=1	83	ITS1	no	400	360	400	0.231
chimera_m355567/326/CCS|F;size=1_and_m153914/1445/CCS|F;size=1_at_217_ITS2_reversed_no_1009	m355567/326/CCS|F;size=1	m153914/1445/CCS|F;size=1	217	ITS2	no	520	326	520	0.666
chimera_m27036/1128/CCS|F;size=1_and_m228931/779/CCS|F;size=1_at_119_ITS1_reversed_no_1010	m27036/1128/CCS|F;size=1	m228931/779/CCS|F;size=1	119	ITS1	no	469	470	469	0.253
chimera_m171933/968/CCS|F;size=1_and_m186665/1750/CCS|F;size=1_at_107_ITS1_reversed_no_1011	m171933/968/CCS|F;size=1	m186665/1750/CCS|F;size=1	107	ITS1	no	455	469	455	0.228
chimera_m51472/726/CCS|F;size=1_and_m261746/1479/CCS|F;size=2_at_437_ITS2_reversed_no_1012	m51472/726/CCS|F;size=1	m261746/1479/CCS|F;size=2	437	ITS2	no	449	600	449	0.728
chimera_m84199/943/CCS|F;size=1_and_m176218/1943/CCS|F;size=1_at_457_ITS2_reversed_yes_1013	m84199/943/CCS|F;size=1	m176218/1943/CCS|F;size=1	457	ITS2	yes	561	533	561	0.857
chimera_m381573/685/CCS|T;size=1_and_m363769/1111/CCS|F;size=1_at_92_ITS1_reversed_no_1014	m381573/685/CCS|T;size=1	m363769/1111/CCS|F;size=1	92	ITS1	no	579	418	579	0.22
chimera_m243735/949/CCS|F;size=2_and_m36809/998/CCS|F;size=1_at_355_ITS2_reversed_no_1015	m243735/949/CCS|F;size=2	m36809/998/CCS|F;size=1	355	ITS2	no	528	506	528	0.702
chimera_m232882/1343/CCS|F;size=1_and_m191453/1324/CCS|F;size=1_at_356_ITS2_reversed_no_1016	m232882/1343/CCS|F;size=1	m191453/1324/CCS|F;size=1	356	ITS2	no	680	580	680	0.614
chimera_m147114/591/CCS|F;size=1_and_m168103/603/CCS|F;size=1_at_168_ITS1_reversed_no_1017	m147114/591/CCS|F;size=1	m168103/603/CCS|F;size=1	168	ITS1	no	543	591	543	0.284
chimera_m176706/1094/CCS|F;size=2_and_m159944/668/CCS|F;size=1_at_115_ITS1_reversed_no_1018	m176706/1094/CCS|F;size=2	m159944/668/CCS|F;size=1	115	ITS1	no	395	532	395	0.216
chimera_m107667/617/CCS|F;size=1_and_m143584/1093/CCS|F;size=1_at_364_ITS2_reversed_no_1019	m107667/617/CCS|F;size=1	m143584/1093/CCS|F;size=1	364	ITS2	no	521	541	521	0.673
chimera_m223676/531/CCS|F;size=1_and_m135540/1009/CCS|F;size=1_at_314_ITS2_reversed_yes_1020	m223676/531/CCS|F;size=1	m135540/1009/CCS|F;size=1	314	ITS2	yes	598	452	598	0.695
chimera_m250010/833/CCS|F;size=1_and_m75089/1095/CCS|F;size=1_at_126_ITS1_reversed_no_1021	m250010/833/CCS|F;size=1	m75089/1095/CCS|F;size=1	126	ITS1	no	614	546	614	0.231
chimera_m173518/1857/CCS|F;size=1_and_m207410/1087/CCS|F;size=1_at_342_ITS2_reversed_no_1022	m173518/1857/CCS|F;size=1	m207410/1087/CCS|F;size=1	342	ITS2	no	506	426	506	0.803
chimera_m1910/1067/CCS|F;size=1_and_m143518/1697/CCS|F;size=1_at_247_ITS2_reversed_no_1023	m1910/1067/CCS|F;size=1	m143518/1697/CCS|F;size=1	247	ITS2	no	466	478	466	0.517
chimera_m258744/1611/CCS|F;size=1_and_m158843/760/CCS|F;size=1_at_425_ITS2_reversed_no_1024	m258744/1611/CCS|F;size=1	m158843/760/CCS|F;size=1	425	ITS2	no	537	524	537	0.811
chimera_m186247/1130/CCS|F;size=1_and_m205406/715/CCS|F;size=1_at_398_ITS2_reversed_no_1025	m186247/1130/CCS|F;size=1	m205406/715/CCS|F;size=1	398	ITS2	no	420	539	420	0.738
chimera_m417697/790/CCS|F;size=1_and_m398466/484/CCS|F;size=1_at_589_ITS2_reversed_no_1026	m417697/790/CCS|F;size=1	m398466/484/CCS|F;size=1	589	ITS2	no	589	790	484	0.746
chimera_m29954/1123/CCS|F;size=1_and_m287547/686/CCS|F;size=1_at_375_ITS2_reversed_no_1027	m29954/1123/CCS|F;size=1	m287547/686/CCS|F;size=1	375	ITS2	no	397	582	397	0.644
chimera_m17261/1198/CCS|F;size=2_and_m35029/984/CCS|F;size=1_at_206_ITS1_reversed_no_1028	m17261/1198/CCS|F;size=2	m35029/984/CCS|F;size=1	206	ITS1	no	550	891	550	0.231
chimera_m121206/542/CCS|F;size=1_and_m166617/1205/CCS|F;size=1_at_415_ITS2_reversed_no_1029	m121206/542/CCS|F;size=1	m166617/1205/CCS|F;size=1	415	ITS2	no	547	516	547	0.804
chimera_m103455/822/CCS|F;size=1_and_m84523/1194/CCS|F;size=1_at_213_ITS2_reversed_no_1030	m103455/822/CCS|F;size=1	m84523/1194/CCS|F;size=1	213	ITS2	no	602	407	602	0.523
chimera_m89926/1127/CCS|F;size=1_and_m393761/777/CCS|F;size=1_at_365_ITS2_reversed_yes_1031	m89926/1127/CCS|F;size=1	m393761/777/CCS|F;size=1	365	ITS2	yes	612	546	612	0.668
chimera_m7161/549/CCS|F;size=2_and_m104911/1007/CCS|F;size=2_at_217_ITS2_reversed_no_1032	m7161/549/CCS|F;size=2	m104911/1007/CCS|F;size=2	217	ITS2	no	561	445	561	0.488
chimera_m191232/582/CCS|F;size=1_and_m110161/534/CCS|F;size=1_at_167_ITS1_reversed_no_1033	m191232/582/CCS|F;size=1	m110161/534/CCS|F;size=1	167	ITS1	no	466	494	466	0.338
chimera_m247606/1219/CCS|F;size=1_and_m369129/619/CCS|F;size=1_at_324_ITS2_reversed_no_1034	m247606/1219/CCS|F;size=1	m369129/619/CCS|F;size=1	324	ITS2	no	619	501	619	0.647
chimera_m192344/2022/CCS|F;size=1_and_m40440/772/CCS|F;size=2_at_141_ITS1_reversed_no_1035	m192344/2022/CCS|F;size=1	m40440/772/CCS|F;size=2	141	ITS1	no	509	759	509	0.186
chimera_m89799/448/CCS|F;size=1_and_m191376/1240/CCS|F;size=1_at_319_ITS2_reversed_no_1036	m89799/448/CCS|F;size=1	m191376/1240/CCS|F;size=1	319	ITS2	no	580	448	580	0.712
chimera_m170270/1282/CCS|F;size=1_and_m252107/626/CCS|F;size=1_at_125_ITS1_reversed_no_1037	m170270/1282/CCS|F;size=1	m252107/626/CCS|F;size=1	125	ITS1	no	626	515	626	0.243
chimera_m31762/695/CCS|F;size=2_and_m317235/506/CCS|F;size=1_at_421_ITS2_reversed_no_1038	m31762/695/CCS|F;size=2	m317235/506/CCS|F;size=1	421	ITS2	no	480	550	480	0.765
chimera_m13007/1088/CCS|F;size=1_and_m283092/1603/CCS|F;size=1_at_330_ITS2_reversed_no_1039	m13007/1088/CCS|F;size=1	m283092/1603/CCS|F;size=1	330	ITS2	no	678	471	678	0.701
chimera_m78815/715/CCS|F;size=1_and_m437678/676/CCS|F;size=1_at_145_ITS1_reversed_no_1040	m78815/715/CCS|F;size=1	m437678/676/CCS|F;size=1	145	ITS1	no	676	493	676	0.294
chimera_m147114/591/CCS|F;size=1_and_m37043/1445/CCS|F;size=2_at_415_ITS2_reversed_no_1041	m147114/591/CCS|F;size=1	m37043/1445/CCS|F;size=2	415	ITS2	no	488	591	488	0.702
chimera_m253363/804/CCS|F;size=1_and_m30053/1240/CCS|F;size=1_at_344_ITS2_reversed_no_1042	m253363/804/CCS|F;size=1	m30053/1240/CCS|F;size=1	344	ITS2	no	510	491	510	0.701
chimera_m252481/542/CCS|F;size=1_and_m191076/1368/CCS|F;size=1_at_284_ITS2_reversed_no_1043	m252481/542/CCS|F;size=1	m191076/1368/CCS|F;size=1	284	ITS2	no	477	490	477	0.58
chimera_m279282/1868/CCS|F;size=1_and_m127539/905/CCS|F;size=1_at_328_ITS2_reversed_no_1044	m279282/1868/CCS|F;size=1	m127539/905/CCS|F;size=1	328	ITS2	no	397	449	397	0.731
chimera_m33444/1319/CCS|F;size=1_and_m190234/1753/CCS|F;size=1_at_331_ITS2_reversed_yes_1045	m33444/1319/CCS|F;size=1	m190234/1753/CCS|F;size=1	331	ITS2	yes	470	515	470	0.643
chimera_m15874/797/CCS|F;size=1_and_m12887/973/CCS|F;size=1_at_31_ITS1_reversed_no_1046	m15874/797/CCS|F;size=1	m12887/973/CCS|F;size=1	31	ITS1	no	499	503	499	0.062
chimera_m195181/1259/CCS|F;size=1_and_m86570/931/CCS|F;size=1_at_64_ITS1_reversed_no_1047	m195181/1259/CCS|F;size=1	m86570/931/CCS|F;size=1	64	ITS1	no	447	558	447	0.115
chimera_m23665/1314/CCS|F;size=1_and_m340557/776/CCS|F;size=1_at_126_ITS1_reversed_no_1048	m23665/1314/CCS|F;size=1	m340557/776/CCS|F;size=1	126	ITS1	no	724	465	724	0.271
chimera_m17056/857/CCS|F;size=1_and_m76510/1792/CCS|F;size=1_at_472_ITS2_reversed_no_1049	m17056/857/CCS|F;size=1	m76510/1792/CCS|F;size=1	472	ITS2	no	588	670	588	0.704
chimera_m217244/420/CCS|F;size=1_and_m217488/1936/CCS|F;size=1_at_234_ITS2_reversed_no_1050	m217244/420/CCS|F;size=1	m217488/1936/CCS|F;size=1	234	ITS2	no	534	420	534	0.557
chimera_m225055/1020/CCS|F;size=2_and_m144959/1071/CCS|F;size=2_at_92_ITS1_reversed_no_1051	m225055/1020/CCS|F;size=2	m144959/1071/CCS|F;size=2	92	ITS1	no	489	467	489	0.197
chimera_m13424/847/CCS|F;size=1_and_m18623/716/CCS|F;size=1_at_338_ITS2_reversed_no_1052	m13424/847/CCS|F;size=1	m18623/716/CCS|F;size=1	338	ITS2	no	457	529	457	0.639
chimera_m2204/1444/CCS|F;size=1_and_m247368/1135/CCS|F;size=1_at_135_ITS1_reversed_no_1053	m2204/1444/CCS|F;size=1	m247368/1135/CCS|F;size=1	135	ITS1	no	599	563	599	0.24
chimera_m248631/1057/CCS|F;size=1_and_m438950/1561/CCS|F;size=1_at_483_ITS2_reversed_no_1054	m248631/1057/CCS|F;size=1	m438950/1561/CCS|F;size=1	483	ITS2	no	590	833	590	0.58
chimera_m119182/601/CCS|F;size=1_and_m194482/1599/CCS|F;size=1_at_54_ITS1_reversed_no_1055	m119182/601/CCS|F;size=1	m194482/1599/CCS|F;size=1	54	ITS1	no	517	409	517	0.132
chimera_m89642/950/CCS|F;size=1_and_m198042/690/CCS|F;size=1_at_304_ITS2_reversed_no_1056	m89642/950/CCS|F;size=1	m198042/690/CCS|F;size=1	304	ITS2	no	529	534	529	0.569
chimera_m69808/1162/CCS|F;size=1_and_m263954/1416/CCS|F;size=1_at_427_ITS2_reversed_no_1057	m69808/1162/CCS|F;size=1	m263954/1416/CCS|F;size=1	427	ITS2	no	584	589	584	0.725
chimera_m129709/533/CCS|F;size=1_and_m8359/1676/CCS|F;size=94_at_426_ITS2_reversed_no_1058	m129709/533/CCS|F;size=1	m8359/1676/CCS|F;size=94	426	ITS2	no	614	533	614	0.799
chimera_m201539/1613/CCS|F;size=1_and_m115037/1288/CCS|F;size=1_at_293_ITS2_reversed_no_1059	m201539/1613/CCS|F;size=1	m115037/1288/CCS|F;size=1	293	ITS2	no	514	497	514	0.59
chimera_m128048/872/CCS|F;size=1_and_m174866/1461/CCS|F;size=1_at_114_ITS1_reversed_no_1060	m128048/872/CCS|F;size=1	m174866/1461/CCS|F;size=1	114	ITS1	no	511	489	511	0.233
chimera_m393976/592/CCS|F;size=1_and_m229144/535/CCS|F;size=1_at_356_ITS2_reversed_yes_1061	m393976/592/CCS|F;size=1	m229144/535/CCS|F;size=1	356	ITS2	yes	409	469	409	0.759
chimera_m40461/1105/CCS|F;size=1_and_m299260/1367/CCS|F;size=1_at_488_ITS2_reversed_no_1062	m40461/1105/CCS|F;size=1	m299260/1367/CCS|F;size=1	488	ITS2	no	540	608	540	0.803
chimera_m286741/707/CCS|F;size=1_and_m81422/922/CCS|F;size=1_at_69_ITS1_reversed_no_1063	m286741/707/CCS|F;size=1	m81422/922/CCS|F;size=1	69	ITS1	no	448	517	448	0.133
chimera_m18361/701/CCS|F;size=2_and_m276286/750/CCS|F;size=1_at_41_ITS1_reversed_no_1064	m18361/701/CCS|F;size=2	m276286/750/CCS|F;size=1	41	ITS1	no	517	460	517	0.089
chimera_m76656/529/CCS|F;size=1_and_m344949/832/CCS|F;size=1_at_327_ITS2_reversed_no_1065	m76656/529/CCS|F;size=1	m344949/832/CCS|F;size=1	327	ITS2	no	697	424	697	0.771
chimera_m175701/1123/CCS|F;size=1_and_m247542/687/CCS|F;size=1_at_124_ITS1_reversed_no_1066	m175701/1123/CCS|F;size=1	m247542/687/CCS|F;size=1	124	ITS1	no	471	489	471	0.254
chimera_m470313/1284/CCS|F;size=1_and_m56002/549/CCS|F;size=1_at_219_ITS1_reversed_yes_1067	m470313/1284/CCS|F;size=1	m56002/549/CCS|F;size=1	219	ITS1	yes	496	795	496	0.275
chimera_m64093/643/CCS|F;size=1_and_m35665/1055/CCS|F;size=1_at_301_ITS2_reversed_no_1068	m64093/643/CCS|F;size=1	m35665/1055/CCS|F;size=1	301	ITS2	no	349	499	349	0.603
chimera_m274886/868/CCS|F;size=2_and_m75105/436/CCS|F;size=1_at_499_ITS2_reversed_no_1069	m274886/868/CCS|F;size=2	m75105/436/CCS|F;size=1	499	ITS2	no	499	700	436	0.713
chimera_m207344/415/CCS|F;size=1_and_m4890/789/CCS|F;size=1_at_134_ITS1_reversed_no_1070	m207344/415/CCS|F;size=1	m4890/789/CCS|F;size=1	134	ITS1	no	455	415	455	0.323
chimera_m237661/980/CCS|F;size=1_and_m66934/664/CCS|F;size=1_at_335_ITS2_reversed_no_1071	m237661/980/CCS|F;size=1	m66934/664/CCS|F;size=1	335	ITS2	no	438	621	438	0.539
chimera_m24905/437/CCS|F;size=1_and_m362267/612/CCS|F;size=1_at_60_ITS1_reversed_no_1072	m24905/437/CCS|F;size=1	m362267/612/CCS|F;size=1	60	ITS1	no	612	406	612	0.148
chimera_m178420/880/CCS|F;size=2_and_m32342/1087/CCS|F;size=1_at_179_5.8S_reversed_no_1073	m178420/880/CCS|F;size=2	m32342/1087/CCS|F;size=1	179	5.8S	no	657	446	657	0.401
chimera_m28514/904/CCS|F;size=1_and_m313531/977/CCS|F;size=1_at_403_ITS2_reversed_no_1074	m28514/904/CCS|F;size=1	m313531/977/CCS|F;size=1	403	ITS2	no	502	494	502	0.816
chimera_m136753/1132/CCS|F;size=1_and_m81931/1446/CCS|F;size=1_at_343_ITS2_reversed_no_1075	m136753/1132/CCS|F;size=1	m81931/1446/CCS|F;size=1	343	ITS2	no	749	539	749	0.636
chimera_m340207/1106/CCS|F;size=1_and_m45964/732/CCS|F;size=1_at_38_ITS1_reversed_no_1076	m340207/1106/CCS|F;size=1	m45964/732/CCS|F;size=1	38	ITS1	no	531	453	531	0.084
chimera_m128150/1019/CCS|F;size=1_and_m240998/740/CCS|F;size=1_at_46_ITS1_reversed_no_1077	m128150/1019/CCS|F;size=1	m240998/740/CCS|F;size=1	46	ITS1	no	444	466	444	0.099
chimera_m308110/767/CCS|F;size=1_and_m153510/828/CCS|F;size=1_at_426_ITS2_reversed_yes_1078	m308110/767/CCS|F;size=1	m153510/828/CCS|F;size=1	426	ITS2	yes	584	655	584	0.65
chimera_m47597/1187/CCS|F;size=1_and_m2306/1501/CCS|F;size=1_at_58_ITS1_reversed_no_1079	m47597/1187/CCS|F;size=1	m2306/1501/CCS|F;size=1	58	ITS1	no	409	521	409	0.111
chimera_m88116/987/CCS|F;size=1_and_m109646/1463/CCS|F;size=1_at_145_ITS1_reversed_no_1080	m88116/987/CCS|F;size=1	m109646/1463/CCS|F;size=1	145	ITS1	no	765	588	765	0.247
chimera_m62442/1371/CCS|F;size=1_and_m95216/795/CCS|F;size=1_at_375_ITS2_reversed_no_1081	m62442/1371/CCS|F;size=1	m95216/795/CCS|F;size=1	375	ITS2	no	610	576	610	0.651
chimera_m222323/572/CCS|F;size=1_and_m118454/1569/CCS|F;size=1_at_272_5.8S_reversed_no_1082	m222323/572/CCS|F;size=1	m118454/1569/CCS|F;size=1	272	5.8S	no	573	572	573	0.476
chimera_m204037/1313/CCS|F;size=1_and_m84375/478/CCS|F;size=1_at_61_ITS1_reversed_no_1083	m204037/1313/CCS|F;size=1	m84375/478/CCS|F;size=1	61	ITS1	no	478	477	478	0.128
chimera_m121254/1480/CCS|F;size=1_and_m86954/771/CCS|F;size=2_at_295_ITS2_reversed_no_1084	m121254/1480/CCS|F;size=1	m86954/771/CCS|F;size=2	295	ITS2	no	468	475	468	0.621
chimera_m109187/1132/CCS|F;size=1_and_m230732/1632/CCS|F;size=1_at_301_ITS2_reversed_no_1085	m109187/1132/CCS|F;size=1	m230732/1632/CCS|F;size=1	301	ITS2	no	588	463	588	0.65
chimera_m329225/469/CCS|F;size=1_and_m25137/849/CCS|F;size=1_at_315_ITS2_reversed_no_1086	m329225/469/CCS|F;size=1	m25137/849/CCS|F;size=1	315	ITS2	no	619	469	619	0.672
chimera_m113062/1107/CCS|F;size=1_and_m240331/826/CCS|F;size=1_at_212_ITS1_reversed_no_1087	m113062/1107/CCS|F;size=1	m240331/826/CCS|F;size=1	212	ITS1	no	394	643	394	0.33
chimera_m25054/1010/CCS|F;size=1_and_m186987/1389/CCS|F;size=1_at_364_ITS2_reversed_no_1088	m25054/1010/CCS|F;size=1	m186987/1389/CCS|F;size=1	364	ITS2	no	518	736	518	0.495
chimera_m61950/1217/CCS|F;size=1_and_m309275/1350/CCS|F;size=1_at_86_ITS1_reversed_no_1089	m61950/1217/CCS|F;size=1	m309275/1350/CCS|F;size=1	86	ITS1	no	440	546	440	0.158
chimera_m250269/650/CCS|F;size=1_and_m264195/1473/CCS|F;size=1_at_315_ITS2_reversed_no_1090	m250269/650/CCS|F;size=1	m264195/1473/CCS|F;size=1	315	ITS2	no	682	509	682	0.619
chimera_m77401/644/CCS|F;size=1_and_m26771/1244/CCS|F;size=1_at_148_ITS1_reversed_no_1091	m77401/644/CCS|F;size=1	m26771/1244/CCS|F;size=1	148	ITS1	no	488	551	488	0.269
chimera_m48160/1178/CCS|F;size=1_and_m191521/709/CCS|F;size=1_at_107_ITS1_reversed_no_1092	m48160/1178/CCS|F;size=1	m191521/709/CCS|F;size=1	107	ITS1	no	709	564	709	0.19
chimera_m144367/475/CCS|F;size=1_and_m99211/1128/CCS|F;size=1_at_317_ITS2_reversed_no_1093	m144367/475/CCS|F;size=1	m99211/1128/CCS|F;size=1	317	ITS2	no	537	475	537	0.667
chimera_m95487/1910/CCS|F;size=1_and_m3057/822/CCS|F;size=1_at_167_ITS1_reversed_no_1094	m95487/1910/CCS|F;size=1	m3057/822/CCS|F;size=1	167	ITS1	no	422	508	422	0.329
chimera_m165552/1498/CCS|F;size=1_and_m269130/1063/CCS|F;size=2_at_144_ITS1_reversed_no_1095	m165552/1498/CCS|F;size=1	m269130/1063/CCS|F;size=2	144	ITS1	no	535	473	535	0.304
chimera_m160898/513/CCS|F;size=1_and_m296133/864/CCS|F;size=2_at_345_ITS2_reversed_no_1096	m160898/513/CCS|F;size=1	m296133/864/CCS|F;size=2	345	ITS2	no	410	513	410	0.673
chimera_m68991/1139/CCS|F;size=1_and_m282632/638/CCS|F;size=1_at_77_ITS1_reversed_no_1097	m68991/1139/CCS|F;size=1	m282632/638/CCS|F;size=1	77	ITS1	no	456	485	456	0.159
chimera_m82346/833/CCS|F;size=1_and_m296712/880/CCS|F;size=1_at_33_ITS1_reversed_no_1098	m82346/833/CCS|F;size=1	m296712/880/CCS|F;size=1	33	ITS1	no	597	399	597	0.083
chimera_m38404/409/CCS|F;size=1_and_m6406/1433/CCS|F;size=1_at_101_ITS1_reversed_no_1099	m38404/409/CCS|F;size=1	m6406/1433/CCS|F;size=1	101	ITS1	no	616	409	616	0.247
chimera_m31727/1023/CCS|F;size=1_and_m63671/659/CCS|F;size=1_at_318_ITS2_reversed_no_1100	m31727/1023/CCS|F;size=1	m63671/659/CCS|F;size=1	318	ITS2	no	500	452	500	0.704
chimera_m243434/1959/CCS|F;size=1_and_m269458/1244/CCS|F;size=1_at_532_ITS2_reversed_no_1101	m243434/1959/CCS|F;size=1	m269458/1244/CCS|F;size=1	532	ITS2	no	532	772	532	0.689
chimera_m207316/1465/CCS|F;size=1_and_m37989/1605/CCS|F;size=1_at_241_ITS2_reversed_no_1102	m207316/1465/CCS|F;size=1	m37989/1605/CCS|F;size=1	241	ITS2	no	574	483	574	0.499
chimera_m191251/728/CCS|F;size=1_and_m358364/868/CCS|F;size=1_at_426_ITS2_reversed_no_1103	m191251/728/CCS|F;size=1	m358364/868/CCS|F;size=1	426	ITS2	no	551	667	551	0.639
chimera_m44066/642/CCS|F;size=1_and_m271218/1338/CCS|F;size=1_at_271_ITS2_reversed_no_1104	m44066/642/CCS|F;size=1	m271218/1338/CCS|F;size=1	271	ITS2	no	526	447	526	0.606
chimera_m23191/1186/CCS|F;size=1_and_m286935/878/CCS|F;size=1_at_150_ITS1_reversed_yes_1105	m23191/1186/CCS|F;size=1	m286935/878/CCS|F;size=1	150	ITS1	yes	628	569	628	0.264
chimera_m11766/1319/CCS|F;size=1_and_m315877/1102/CCS|F;size=1_at_128_ITS1_reversed_yes_1106	m11766/1319/CCS|F;size=1	m315877/1102/CCS|F;size=1	128	ITS1	yes	620	545	620	0.235
chimera_m44288/1015/CCS|F;size=1_and_m42516/595/CCS|F;size=1_at_353_ITS2_reversed_no_1107	m44288/1015/CCS|F;size=1	m42516/595/CCS|F;size=1	353	ITS2	no	376	555	376	0.636
chimera_m48080/800/CCS|F;size=1_and_m6014/1301/CCS|F;size=1_at_255_5.8S_reversed_no_1108	m48080/800/CCS|F;size=1	m6014/1301/CCS|F;size=1	255	5.8S	no	500	590	500	0.432
chimera_m47532/856/CCS|F;size=2_and_m121394/649/CCS|F;size=2_at_356_ITS2_reversed_yes_1109	m47532/856/CCS|F;size=2	m121394/649/CCS|F;size=2	356	ITS2	yes	523	532	523	0.669
chimera_m123554/1440/CCS|F;size=2_and_m133721/886/CCS|F;size=1_at_326_ITS2_reversed_no_1110	m123554/1440/CCS|F;size=2	m133721/886/CCS|F;size=1	326	ITS2	no	495	523	495	0.623
chimera_m1645/610/CCS|F;size=1_and_m128150/1019/CCS|F;size=1_at_254_ITS2_reversed_no_1111	m1645/610/CCS|F;size=1	m128150/1019/CCS|F;size=1	254	ITS2	no	466	508	466	0.5
chimera_m179121/1029/CCS|F;size=1_and_m108733/643/CCS|F;size=1_at_298_ITS2_reversed_no_1112	m179121/1029/CCS|F;size=1	m108733/643/CCS|F;size=1	298	ITS2	no	432	444	432	0.671
chimera_m133547/858/CCS|F;size=1_and_m244463/1224/CCS|F;size=1_at_365_ITS2_reversed_no_1113	m133547/858/CCS|F;size=1	m244463/1224/CCS|F;size=1	365	ITS2	no	528	582	528	0.627
chimera_m68277/1302/CCS|F;size=1_and_m151436/1122/CCS|F;size=1_at_190_5.8S_reversed_no_1114	m68277/1302/CCS|F;size=1	m151436/1122/CCS|F;size=1	190	5.8S	no	415	510	415	0.373
chimera_m64846/1909/CCS|F;size=1_and_m194636/1347/CCS|F;size=1_at_183_ITS1_reversed_no_1115	m64846/1909/CCS|F;size=1	m194636/1347/CCS|F;size=1	183	ITS1	no	492	530	492	0.345
chimera_m222794/453/CCS|F;size=1_and_m293110/684/CCS|F;size=1_at_306_ITS2_reversed_no_1116	m222794/453/CCS|F;size=1	m293110/684/CCS|F;size=1	306	ITS2	no	586	412	586	0.743
chimera_m143166/652/CCS|F;size=1_and_m208568/918/CCS|F;size=1_at_337_ITS2_reversed_no_1117	m143166/652/CCS|F;size=1	m208568/918/CCS|F;size=1	337	ITS2	no	603	502	603	0.671
chimera_m40635/821/CCS|F;size=1_and_m77415/1422/CCS|F;size=1_at_179_5.8S_reversed_no_1118	m40635/821/CCS|F;size=1	m77415/1422/CCS|F;size=1	179	5.8S	no	462	499	462	0.359
chimera_m107145/976/CCS|F;size=1_and_m312726/1682/CCS|F;size=1_at_52_ITS1_reversed_no_1119	m107145/976/CCS|F;size=1	m312726/1682/CCS|F;size=1	52	ITS1	no	639	548	639	0.095
chimera_m156869/1587/CCS|F;size=1_and_m280140/813/CCS|F;size=1_at_69_ITS1_reversed_no_1120	m156869/1587/CCS|F;size=1	m280140/813/CCS|F;size=1	69	ITS1	no	615	461	615	0.15
chimera_m250557/649/CCS|F;size=2_and_m122368/708/CCS|F;size=1_at_442_ITS2_reversed_no_1121	m250557/649/CCS|F;size=2	m122368/708/CCS|F;size=1	442	ITS2	no	456	561	456	0.788
chimera_m18168/985/CCS|F;size=1_and_m127575/865/CCS|F;size=1_at_275_ITS2_reversed_no_1122	m18168/985/CCS|F;size=1	m127575/865/CCS|F;size=1	275	ITS2	no	520	510	520	0.539
chimera_m302378/478/CCS|F;size=1_and_m255316/450/CCS|F;size=1_at_57_ITS1_reversed_no_1123	m302378/478/CCS|F;size=1	m255316/450/CCS|F;size=1	57	ITS1	no	450	478	450	0.119
chimera_m268257/1136/CCS|F;size=1_and_m285174/837/CCS|F;size=1_at_130_ITS1_reversed_no_1124	m268257/1136/CCS|F;size=1	m285174/837/CCS|F;size=1	130	ITS1	no	488	663	488	0.196
chimera_m366934/965/CCS|F;size=1_and_m33054/1018/CCS|F;size=1_at_295_ITS2_reversed_no_1125	m366934/965/CCS|F;size=1	m33054/1018/CCS|F;size=1	295	ITS2	no	571	540	571	0.546
chimera_m197688/1485/CCS|F;size=1_and_m142453/670/CCS|F;size=1_at_58_ITS1_reversed_no_1126	m197688/1485/CCS|F;size=1	m142453/670/CCS|F;size=1	58	ITS1	no	506	578	506	0.1
chimera_m65640/668/CCS|F;size=1_and_m338629/1204/CCS|F;size=1_at_250_ITS2_reversed_no_1127	m65640/668/CCS|F;size=1	m338629/1204/CCS|F;size=1	250	ITS2	no	424	388	424	0.644
chimera_m99493/649/CCS|F;size=1_and_m183169/554/CCS|F;size=1_at_324_ITS2_reversed_no_1128	m99493/649/CCS|F;size=1	m183169/554/CCS|F;size=1	324	ITS2	no	554	486	554	0.667
chimera_m2197/655/CCS|F;size=1_and_m243868/714/CCS|F;size=1_at_171_ITS1_reversed_no_1129	m2197/655/CCS|F;size=1	m243868/714/CCS|F;size=1	171	ITS1	no	631	558	631	0.306
chimera_m319557/1493/CCS|F;size=1_and_m102224/1116/CCS|F;size=1_at_428_ITS2_reversed_no_1130	m319557/1493/CCS|F;size=1	m102224/1116/CCS|F;size=1	428	ITS2	no	565	783	565	0.547
chimera_m91829/732/CCS|F;size=1_and_m31902/472/CCS|F;size=2_at_253_ITS2_reversed_no_1131	m91829/732/CCS|F;size=1	m31902/472/CCS|F;size=2	253	ITS2	no	446	442	446	0.572
chimera_m344686/740/CCS|F;size=1_and_m52328/913/CCS|F;size=1_at_316_ITS2_reversed_no_1132	m344686/740/CCS|F;size=1	m52328/913/CCS|F;size=1	316	ITS2	no	543	487	543	0.649
chimera_m297360/868/CCS|F;size=1_and_m198001/1310/CCS|F;size=1_at_39_ITS1_reversed_no_1133	m297360/868/CCS|F;size=1	m198001/1310/CCS|F;size=1	39	ITS1	no	528	448	528	0.087
chimera_m192845/922/CCS|F;size=1_and_m117361/868/CCS|F;size=1_at_394_ITS2_reversed_no_1134	m192845/922/CCS|F;size=1	m117361/868/CCS|F;size=1	394	ITS2	no	442	532	442	0.741
chimera_m67831/717/CCS|F;size=1_and_m244758/564/CCS|F;size=1_at_256_ITS2_reversed_no_1135	m67831/717/CCS|F;size=1	m244758/564/CCS|F;size=1	256	ITS2	no	429	429	429	0.597
chimera_m79073/732/CCS|F;size=1_and_m62593/1291/CCS|F;size=1_at_265_ITS2_reversed_no_1136	m79073/732/CCS|F;size=1	m62593/1291/CCS|F;size=1	265	ITS2	no	538	416	538	0.637
chimera_m100790/484/CCS|F;size=1_and_m108326/1190/CCS|F;size=2_at_6_ITS1_reversed_no_1137	m100790/484/CCS|F;size=1	m108326/1190/CCS|F;size=2	6	ITS1	no	493	446	493	0.013
chimera_m174145/1368/CCS|F;size=1_and_m43802/393/CCS|F;size=1_at_408_ITS2_reversed_no_1138	m174145/1368/CCS|F;size=1	m43802/393/CCS|F;size=1	408	ITS2	no	408	532	393	0.767
chimera_m199244/1084/CCS|F;size=1_and_m290377/1001/CCS|F;size=1_at_466_ITS2_reversed_no_1139	m199244/1084/CCS|F;size=1	m290377/1001/CCS|F;size=1	466	ITS2	no	89	608	470	0.766
chimera_m24761/1226/CCS|F;size=1_and_m65960/1282/CCS|F;size=1_at_488_ITS2_reversed_no_1140	m24761/1226/CCS|F;size=1	m65960/1282/CCS|F;size=1	488	ITS2	no	79	587	552	0.831
chimera_m45256/1306/CCS|F;size=1_and_m123190/876/CCS|F;size=1_at_256_5.8S_reversed_no_1141	m45256/1306/CCS|F;size=1	m123190/876/CCS|F;size=1	256	5.8S	no	65	561	383	0.456
chimera_m53505/855/CCS|F;size=1_and_m25353/634/CCS|F;size=2_at_109_ITS1_reversed_no_1142	m53505/855/CCS|F;size=1	m25353/634/CCS|F;size=2	109	ITS1	no	93	624	533	0.175
chimera_m141245/372/CCS|F;size=1_and_m242844/856/CCS|F;size=1_at_113_ITS1_reversed_no_1143	m141245/372/CCS|F;size=1	m242844/856/CCS|F;size=1	113	ITS1	no	58	372	419	0.304
chimera_m180336/1375/CCS|F;size=1_and_m150268/1493/CCS|F;size=1_at_302_ITS2_reversed_no_1144	m180336/1375/CCS|F;size=1	m150268/1493/CCS|F;size=1	302	ITS2	no	71	432	407	0.699
chimera_m266723/1527/CCS|F;size=1_and_m104647/1185/CCS|F;size=1_at_227_5.8S_reversed_no_1145	m266723/1527/CCS|F;size=1	m104647/1185/CCS|F;size=1	227	5.8S	no	89	514	560	0.442
chimera_m35754/484/CCS|F;size=1_and_m28381/1264/CCS|F;size=2_at_281_ITS2_reversed_no_1146	m35754/484/CCS|F;size=1	m28381/1264/CCS|F;size=2	281	ITS2	no	69	484	415	0.581
chimera_m46212/1685/CCS|F;size=1_and_m209292/1268/CCS|F;size=1_at_449_ITS2_reversed_no_1147	m46212/1685/CCS|F;size=1	m209292/1268/CCS|F;size=1	449	ITS2	no	73	685	508	0.655
chimera_m202988/783/CCS|F;size=1_and_m376681/1921/CCS|F;size=1_at_166_ITS1_reversed_no_1148	m202988/783/CCS|F;size=1	m376681/1921/CCS|F;size=1	166	ITS1	no	61	579	711	0.287
chimera_m147216/1566/CCS|F;size=1_and_m155039/942/CCS|F;size=2_at_163_ITS1_reversed_no_1149	m147216/1566/CCS|F;size=1	m155039/942/CCS|F;size=2	163	ITS1	no	61	503	488	0.324
chimera_m91776/1377/CCS|F;size=1_and_m113345/751/CCS|F;size=1_at_120_ITS1_reversed_no_1150	m91776/1377/CCS|F;size=1	m113345/751/CCS|F;size=1	120	ITS1	no	74	499	622	0.24
chimera_m145452/1537/CCS|F;size=2_and_m495396/667/CCS|F;size=1_at_38_ITS1_reversed_no_1151	m145452/1537/CCS|F;size=2	m495396/667/CCS|F;size=1	38	ITS1	no	86	534	534	0.071
chimera_m49189/1257/CCS|F;size=3_and_m217818/607/CCS|F;size=1_at_457_ITS2_reversed_no_1152	m49189/1257/CCS|F;size=3	m217818/607/CCS|F;size=1	457	ITS2	no	90	774	555	0.59
chimera_m108997/1488/CCS|F;size=1_and_m218085/1677/CCS|F;size=1_at_184_ITS1_reversed_no_1153	m108997/1488/CCS|F;size=1	m218085/1677/CCS|F;size=1	184	ITS1	no	74	828	514	0.222
chimera_m14076/680/CCS|F;size=1_and_m354726/331/CCS|F;size=1_at_181_ITS1_reversed_no_1154	m14076/680/CCS|F;size=1	m354726/331/CCS|F;size=1	181	ITS1	no	53	547	331	0.331
chimera_m113617/1028/CCS|F;size=1_and_m185718/1074/CCS|F;size=1_at_115_ITS1_reversed_no_1155	m113617/1028/CCS|F;size=1	m185718/1074/CCS|F;size=1	115	ITS1	no	72	500	562	0.23
chimera_m10160/720/CCS|F;size=2_and_m214501/526/CCS|F;size=1_at_329_ITS2_reversed_no_1156	m10160/720/CCS|F;size=2	m214501/526/CCS|F;size=1	329	ITS2	no	52	552	455	0.596
chimera_m320706/693/CCS|F;size=1_and_m5995/1964/CCS|F;size=1_at_473_ITS2_reversed_no_1157	m320706/693/CCS|F;size=1	m5995/1964/CCS|F;size=1	473	ITS2	no	74	630	685	0.751
chimera_m76632/1473/CCS|F;size=1_and_m130093/887/CCS|F;size=1_at_406_ITS2_reversed_no_1158	m76632/1473/CCS|F;size=1	m130093/887/CCS|F;size=1	406	ITS2	no	94	547	887	0.742
chimera_m368173/629/CCS|F;size=1_and_m40629/1030/CCS|F;size=2_at_145_ITS1_reversed_no_1159	m368173/629/CCS|F;size=1	m40629/1030/CCS|F;size=2	145	ITS1	no	80	595	523	0.244
chimera_m205568/1570/CCS|F;size=1_and_m101556/770/CCS|F;size=1_at_489_ITS2_reversed_no_1160	m205568/1570/CCS|F;size=1	m101556/770/CCS|F;size=1	489	ITS2	no	489	597	457	0.819
chimera_m119881/1145/CCS|F;size=1_and_m297651/1027/CCS|F;size=1_at_470_ITS2_reversed_no_1161	m119881/1145/CCS|F;size=1	m297651/1027/CCS|F;size=1	470	ITS2	no	515	646	515	0.728
chimera_m52319/506/CCS|F;size=1_and_m248468/1586/CCS|F;size=1_at_145_ITS1_reversed_no_1162	m52319/506/CCS|F;size=1	m248468/1586/CCS|F;size=1	145	ITS1	no	599	468	599	0.31
chimera_m130317/770/CCS|F;size=1_and_m244171/654/CCS|F;size=1_at_472_ITS2_reversed_no_1163	m130317/770/CCS|F;size=1	m244171/654/CCS|F;size=1	472	ITS2	no	570	770	570	0.613
chimera_m68491/1817/CCS|F;size=1_and_m240924/765/CCS|F;size=1_at_477_ITS2_reversed_no_1164	m68491/1817/CCS|F;size=1	m240924/765/CCS|F;size=1	477	ITS2	no	620	711	620	0.671
chimera_m328349/750/CCS|F;size=1_and_m178235/524/CCS|F;size=1_at_192_ITS1_reversed_no_1165	m328349/750/CCS|F;size=1	m178235/524/CCS|F;size=1	192	ITS1	no	437	750	437	0.256
chimera_m227913/618/CCS|F;size=1_and_m77434/1170/CCS|F;size=1_at_487_ITS2_reversed_no_1166	m227913/618/CCS|F;size=1	m77434/1170/CCS|F;size=1	487	ITS2	no	487	618	413	0.788
chimera_m271216/1134/CCS|F;size=1_and_m269875/660/CCS|F;size=2_at_235_5.8S_reversed_no_1167	m271216/1134/CCS|F;size=1	m269875/660/CCS|F;size=2	235	5.8S	no	360	548	360	0.429
chimera_m346503/1174/CCS|F;size=1_and_m443265/649/CCS|F;size=1_at_390_ITS2_reversed_no_1168	m346503/1174/CCS|F;size=1	m443265/649/CCS|F;size=1	390	ITS2	no	596	558	596	0.699
chimera_m104414/668/CCS|F;size=1_and_m14758/1881/CCS|F;size=1_at_165_ITS1_reversed_no_1169	m104414/668/CCS|F;size=1	m14758/1881/CCS|F;size=1	165	ITS1	no	730	631	730	0.261
chimera_m11723/777/CCS|F;size=1_and_m43138/918/CCS|F;size=1_at_139_ITS1_reversed_no_1170	m11723/777/CCS|F;size=1	m43138/918/CCS|F;size=1	139	ITS1	no	632	514	632	0.27
chimera_m363039/1353/CCS|F;size=1_and_m343520/1063/CCS|F;size=1_at_481_ITS2_reversed_no_1171	m363039/1353/CCS|F;size=1	m343520/1063/CCS|F;size=1	481	ITS2	no	770	847	770	0.568
chimera_m45919/1637/CCS|F;size=1_and_m281502/1174/CCS|F;size=1_at_207_5.8S_reversed_yes_1172	m45919/1637/CCS|F;size=1	m281502/1174/CCS|F;size=1	207	5.8S	yes	501	528	501	0.392
chimera_m4810/513/CCS|F;size=1_and_m162703/787/CCS|F;size=1_at_19_ITS1_reversed_no_1173	m4810/513/CCS|F;size=1	m162703/787/CCS|F;size=1	19	ITS1	no	471	406	471	0.047
chimera_m269130/1063/CCS|F;size=2_and_m74596/1656/CCS|F;size=1_at_138_ITS1_reversed_no_1174	m269130/1063/CCS|F;size=2	m74596/1656/CCS|F;size=1	138	ITS1	no	467	535	467	0.258
chimera_m147648/1057/CCS|F;size=1_and_m145502/759/CCS|F;size=1_at_339_ITS2_reversed_no_1175	m147648/1057/CCS|F;size=1	m145502/759/CCS|F;size=1	339	ITS2	no	707	631	707	0.537
chimera_m74287/998/CCS|F;size=1_and_m72899/690/CCS|F;size=1_at_242_ITS2_reversed_no_1176	m74287/998/CCS|F;size=1	m72899/690/CCS|F;size=1	242	ITS2	no	452	447	452	0.541
chimera_m1462/1463/CCS|F;size=91_and_m225024/506/CCS|F;size=1_at_193_ITS1_reversed_no_1177	m1462/1463/CCS|F;size=91	m225024/506/CCS|F;size=1	193	ITS1	no	506	590	506	0.327
chimera_m454997/1599/CCS|F;size=1_and_m122511/378/CCS|F;size=1_at_132_ITS1_reversed_yes_1178	m454997/1599/CCS|F;size=1	m122511/378/CCS|F;size=1	132	ITS1	yes	378	495	378	0.267
chimera_m129459/1645/CCS|F;size=2_and_m334588/892/CCS|F;size=1_at_281_ITS2_reversed_no_1179	m129459/1645/CCS|F;size=2	m334588/892/CCS|F;size=1	281	ITS2	no	691	450	691	0.624
chimera_m224346/1169/CCS|F;size=2_and_m269802/974/CCS|F;size=1_at_162_ITS1_reversed_no_1180	m224346/1169/CCS|F;size=2	m269802/974/CCS|F;size=1	162	ITS1	no	462	571	462	0.284
chimera_m284750/1189/CCS|F;size=1_and_m262855/1481/CCS|F;size=1_at_402_ITS2_reversed_no_1181	m284750/1189/CCS|F;size=1	m262855/1481/CCS|F;size=1	402	ITS2	no	668	622	668	0.646
chimera_m214001/1056/CCS|F;size=1_and_m192891/1205/CCS|F;size=1_at_334_ITS2_reversed_no_1182	m214001/1056/CCS|F;size=1	m192891/1205/CCS|F;size=1	334	ITS2	no	518	520	518	0.642
chimera_m29871/1620/CCS|F;size=1_and_m230859/805/CCS|F;size=1_at_301_ITS2_reversed_no_1183	m29871/1620/CCS|F;size=1	m230859/805/CCS|F;size=1	301	ITS2	no	456	459	456	0.656
chimera_m350573/975/CCS|F;size=1_and_m1341/1793/CCS|F;size=97_at_395_ITS2_reversed_no_1184	m350573/975/CCS|F;size=1	m1341/1793/CCS|F;size=97	395	ITS2	no	571	629	571	0.628
chimera_m221709/526/CCS|F;size=1_and_m318423/792/CCS|F;size=1_at_65_ITS1_reversed_no_1185	m221709/526/CCS|F;size=1	m318423/792/CCS|F;size=1	65	ITS1	no	792	526	792	0.124
chimera_m87281/729/CCS|F;size=1_and_m109800/625/CCS|F;size=1_at_34_ITS1_reversed_no_1186	m87281/729/CCS|F;size=1	m109800/625/CCS|F;size=1	34	ITS1	no	540	473	540	0.072
chimera_m40712/983/CCS|F;size=1_and_m44694/871/CCS|F;size=2_at_299_ITS2_reversed_no_1187	m40712/983/CCS|F;size=1	m44694/871/CCS|F;size=2	299	ITS2	no	466	463	466	0.646
chimera_m245147/1606/CCS|F;size=1_and_m15412/732/CCS|F;size=1_at_162_ITS1_reversed_no_1188	m245147/1606/CCS|F;size=1	m15412/732/CCS|F;size=1	162	ITS1	no	402	531	402	0.305
chimera_m110520/568/CCS|F;size=1_and_m227905/813/CCS|F;size=1_at_91_ITS1_reversed_no_1189	m110520/568/CCS|F;size=1	m227905/813/CCS|F;size=1	91	ITS1	no	517	543	517	0.168
chimera_m257912/879/CCS|F;size=1_and_m100851/1814/CCS|F;size=1_at_395_ITS2_reversed_no_1190	m257912/879/CCS|F;size=1	m100851/1814/CCS|F;size=1	395	ITS2	no	530	589	530	0.671
chimera_m154380/933/CCS|F;size=1_and_m112283/649/CCS|F;size=1_at_451_ITS2_reversed_no_1191	m154380/933/CCS|F;size=1	m112283/649/CCS|F;size=1	451	ITS2	no	649	545	649	0.828
chimera_m214553/1071/CCS|F;size=1_and_m129911/465/CCS|F;size=1_at_345_ITS2_reversed_no_1192	m214553/1071/CCS|F;size=1	m129911/465/CCS|F;size=1	345	ITS2	no	465	546	465	0.632
chimera_m229894/662/CCS|F;size=1_and_m33250/387/CCS|F;size=1_at_254_ITS2_reversed_no_1193	m229894/662/CCS|F;size=1	m33250/387/CCS|F;size=1	254	ITS2	no	387	489	387	0.519
chimera_m124805/1396/CCS|F;size=1_and_m32566/1875/CCS|F;size=1_at_140_ITS1_reversed_yes_1194	m124805/1396/CCS|F;size=1	m32566/1875/CCS|F;size=1	140	ITS1	yes	583	528	583	0.265
chimera_m42428/758/CCS|F;size=1_and_m296427/735/CCS|F;size=1_at_203_5.8S_reversed_no_1195	m42428/758/CCS|F;size=1	m296427/735/CCS|F;size=1	203	5.8S	no	523	448	523	0.453
chimera_m362421/860/CCS|F;size=1_and_m53564/876/CCS|F;size=1_at_396_ITS2_reversed_yes_1196	m362421/860/CCS|F;size=1	m53564/876/CCS|F;size=1	396	ITS2	yes	645	653	645	0.606
chimera_m474701/728/CCS|F;size=1_and_m95819/603/CCS|G;size=1_at_80_ITS1_reversed_no_1197	m474701/728/CCS|F;size=1	m95819/603/CCS|G;size=1	80	ITS1	no	581	481	581	0.166
chimera_m173/943/CCS|F;size=1_and_m158874/1042/CCS|F;size=1_at_271_ITS2_reversed_no_1198	m173/943/CCS|F;size=1	m158874/1042/CCS|F;size=1	271	ITS2	no	668	494	668	0.549
chimera_m303340/1219/CCS|F;size=1_and_m12781/1159/CCS|F;size=1_at_455_ITS2_reversed_no_1199	m303340/1219/CCS|F;size=1	m12781/1159/CCS|F;size=1	455	ITS2	no	701	737	701	0.617
chimera_m91545/1326/CCS|F;size=1_and_m214105/1776/CCS|F;size=2_at_261_ITS2_reversed_no_1200	m91545/1326/CCS|F;size=1	m214105/1776/CCS|F;size=2	261	ITS2	no	425	450	425	0.58
chimera_m407778/1781/CCS|F;size=1_and_m23027/1145/CCS|F;size=1_at_78_ITS1_reversed_no_1201	m407778/1781/CCS|F;size=1	m23027/1145/CCS|F;size=1	78	ITS1	no	526	599	526	0.13
chimera_m266476/724/CCS|F;size=1_and_m151436/1122/CCS|F;size=1_at_305_ITS2_reversed_no_1202	m266476/724/CCS|F;size=1	m151436/1122/CCS|F;size=1	305	ITS2	no	415	486	415	0.628
chimera_m83943/819/CCS|F;size=1_and_m125862/858/CCS|F;size=1_at_415_ITS2_reversed_no_1203	m83943/819/CCS|F;size=1	m125862/858/CCS|F;size=1	415	ITS2	no	447	531	447	0.782
chimera_m361542/1357/CCS|F;size=1_and_m176059/1405/CCS|F;size=1_at_122_ITS1_reversed_no_1204	m361542/1357/CCS|F;size=1	m176059/1405/CCS|F;size=1	122	ITS1	no	497	454	497	0.269
chimera_m26604/1266/CCS|F;size=2_and_m326630/826/CCS|F;size=1_at_277_ITS2_reversed_no_1205	m26604/1266/CCS|F;size=2	m326630/826/CCS|F;size=1	277	ITS2	no	417	479	417	0.578
chimera_m212699/964/CCS|F;size=1_and_m291626/1269/CCS|F;size=1_at_332_ITS1_reversed_no_1206	m212699/964/CCS|F;size=1	m291626/1269/CCS|F;size=1	332	ITS1	no	568	964	568	0.344
chimera_m4499/727/CCS|F;size=1_and_m45300/1450/CCS|F;size=1_at_344_ITS2_reversed_no_1207	m4499/727/CCS|F;size=1	m45300/1450/CCS|F;size=1	344	ITS2	no	604	602	604	0.571
chimera_m65800/951/CCS|F;size=1_and_m114193/1279/CCS|F;size=1_at_363_ITS2_reversed_no_1208	m65800/951/CCS|F;size=1	m114193/1279/CCS|F;size=1	363	ITS2	no	628	532	628	0.682
chimera_m117903/800/CCS|F;size=1_and_m115174/746/CCS|F;size=1_at_305_ITS2_reversed_no_1209	m117903/800/CCS|F;size=1	m115174/746/CCS|F;size=1	305	ITS2	no	558	478	558	0.638
chimera_m85119/598/CCS|F;size=1_and_m69107/1065/CCS|F;size=1_at_84_ITS1_reversed_no_1210	m85119/598/CCS|F;size=1	m69107/1065/CCS|F;size=1	84	ITS1	no	422	537	422	0.156
chimera_m374989/1767/CCS|F;size=1_and_m256308/1431/CCS|F;size=1_at_358_ITS2_reversed_no_1211	m374989/1767/CCS|F;size=1	m256308/1431/CCS|F;size=1	358	ITS2	no	710	599	710	0.598
chimera_m408625/480/CCS|F;size=1_and_m228232/1273/CCS|F;size=1_at_304_ITS2_reversed_no_1212	m408625/480/CCS|F;size=1	m228232/1273/CCS|F;size=1	304	ITS2	no	464	480	464	0.633
chimera_m383037/2146/CCS|F;size=1_and_m170103/523/CCS|F;size=2_at_406_ITS2_reversed_no_1213	m383037/2146/CCS|F;size=1	m170103/523/CCS|F;size=2	406	ITS2	no	451	632	451	0.642
chimera_m178420/880/CCS|F;size=2_and_m58335/981/CCS|F;size=2_at_136_ITS1_reversed_no_1214	m178420/880/CCS|F;size=2	m58335/981/CCS|F;size=2	136	ITS1	no	567	446	567	0.305
chimera_m281502/1174/CCS|F;size=1_and_m132161/536/CCS|F;size=1_at_409_ITS2_reversed_no_1215	m281502/1174/CCS|F;size=1	m132161/536/CCS|F;size=1	409	ITS2	no	536	501	536	0.816
chimera_m186911/775/CCS|F;size=2_and_m169910/960/CCS|F;size=1_at_477_ITS2_reversed_no_1216	m186911/775/CCS|F;size=2	m169910/960/CCS|F;size=1	477	ITS2	no	570	678	570	0.704
chimera_m263148/661/CCS|F;size=1_and_m49053/1615/CCS|F;size=1_at_265_5.8S_reversed_no_1217	m263148/661/CCS|F;size=1	m49053/1615/CCS|F;size=1	265	5.8S	no	608	661	608	0.401
chimera_m208006/796/CCS|T;size=1_and_m273615/455/CCS|F;size=1_at_112_ITS1_reversed_no_1218	m208006/796/CCS|T;size=1	m273615/455/CCS|F;size=1	112	ITS1	no	455	462	455	0.242
chimera_m200542/1248/CCS|F;size=1_and_m393502/867/CCS|F;size=1_at_252_ITS2_reversed_no_1219	m200542/1248/CCS|F;size=1	m393502/867/CCS|F;size=1	252	ITS2	no	648	430	648	0.586
chimera_m264867/1003/CCS|F;size=1_and_m427091/1127/CCS|F;size=1_at_49_ITS1_reversed_no_1220	m264867/1003/CCS|F;size=1	m427091/1127/CCS|F;size=1	49	ITS1	no	526	474	526	0.103
chimera_m43014/1081/CCS|F;size=2_and_m104781/530/CCS|F;size=1_at_207_ITS2_reversed_no_1221	m43014/1081/CCS|F;size=2	m104781/530/CCS|F;size=1	207	ITS2	no	465	360	465	0.575
chimera_m475495/880/CCS|F;size=1_and_m105227/593/CCS|F;size=1_at_256_ITS1_reversed_no_1222	m475495/880/CCS|F;size=1	m105227/593/CCS|F;size=1	256	ITS1	no	501	825	501	0.31
chimera_m92553/562/CCS|F;size=1_and_m20455/793/CCS|F;size=1_at_108_ITS1_reversed_no_1223	m92553/562/CCS|F;size=1	m20455/793/CCS|F;size=1	108	ITS1	no	429	562	429	0.192
chimera_m144455/1168/CCS|F;size=1_and_m9663/1415/CCS|F;size=1_at_145_ITS1_reversed_no_1224	m144455/1168/CCS|F;size=1	m9663/1415/CCS|F;size=1	145	ITS1	no	621	505	621	0.287
chimera_m50579/1173/CCS|F;size=2_and_m94771/1158/CCS|F;size=1_at_282_ITS2_reversed_no_1225	m50579/1173/CCS|F;size=2	m94771/1158/CCS|F;size=1	282	ITS2	no	489	473	489	0.596
chimera_m20775/672/CCS|F;size=2_and_m203787/609/CCS|F;size=1_at_305_ITS2_reversed_no_1226	m20775/672/CCS|F;size=2	m203787/609/CCS|F;size=1	305	ITS2	no	471	522	471	0.584
chimera_m134056/928/CCS|F;size=1_and_m185426/1262/CCS|F;size=1_at_326_ITS2_reversed_no_1227	m134056/928/CCS|F;size=1	m185426/1262/CCS|F;size=1	326	ITS2	no	544	460	544	0.709
chimera_m166884/1092/CCS|F;size=1_and_m332753/1759/CCS|F;size=1_at_272_ITS2_reversed_no_1228	m166884/1092/CCS|F;size=1	m332753/1759/CCS|F;size=1	272	ITS2	no	569	401	569	0.678
chimera_m232035/509/CCS|F;size=1_and_m2190/1440/CCS|F;size=95_at_378_ITS2_reversed_no_1229	m232035/509/CCS|F;size=1	m2190/1440/CCS|F;size=95	378	ITS2	no	504	509	504	0.743
chimera_m222060/699/CCS|F;size=1_and_m279583/808/CCS|F;size=1_at_333_ITS2_reversed_no_1230	m222060/699/CCS|F;size=1	m279583/808/CCS|F;size=1	333	ITS2	no	471	583	471	0.571
chimera_m29369/1249/CCS|F;size=1_and_m52480/903/CCS|F;size=2_at_295_ITS2_reversed_yes_1231	m29369/1249/CCS|F;size=1	m52480/903/CCS|F;size=2	295	ITS2	yes	588	478	588	0.617
chimera_m232259/1802/CCS|F;size=1_and_m184494/539/CCS|F;size=1_at_65_ITS1_reversed_yes_1232	m232259/1802/CCS|F;size=1	m184494/539/CCS|F;size=1	65	ITS1	yes	444	586	444	0.111
chimera_m167074/1668/CCS|F;size=1_and_m88795/894/CCS|F;size=1_at_75_ITS1_reversed_no_1233	m167074/1668/CCS|F;size=1	m88795/894/CCS|F;size=1	75	ITS1	no	489	557	489	0.135
chimera_m59683/1179/CCS|F;size=1_and_m226877/948/CCS|F;size=1_at_133_ITS1_reversed_no_1234	m59683/1179/CCS|F;size=1	m226877/948/CCS|F;size=1	133	ITS1	no	483	557	483	0.239
chimera_m26742/909/CCS|F;size=1_and_m47386/765/CCS|F;size=1_at_286_ITS2_reversed_no_1235	m26742/909/CCS|F;size=1	m47386/765/CCS|F;size=1	286	ITS2	no	528	453	528	0.631
chimera_m3945/725/CCS|F;size=1_and_m110647/686/CCS|F;size=1_at_336_ITS2_reversed_no_1236	m3945/725/CCS|F;size=1	m110647/686/CCS|F;size=1	336	ITS2	no	507	560	507	0.6
chimera_m171083/633/CCS|F;size=1_and_m83927/574/CCS|F;size=1_at_282_ITS2_reversed_no_1237	m171083/633/CCS|F;size=1	m83927/574/CCS|F;size=1	282	ITS2	no	430	391	430	0.721
chimera_m214338/904/CCS|F;size=1_and_m53276/655/CCS|F;size=2_at_66_ITS1_reversed_no_1238	m214338/904/CCS|F;size=1	m53276/655/CCS|F;size=2	66	ITS1	no	487	559	487	0.118
chimera_m69087/925/CCS|F;size=1_and_m33477/1088/CCS|F;size=1_at_538_ITS2_reversed_yes_1239	m69087/925/CCS|F;size=1	m33477/1088/CCS|F;size=1	538	ITS2	yes	663	624	663	0.862
chimera_m154625/1313/CCS|F;size=1_and_m227289/866/CCS|F;size=1_at_447_ITS2_reversed_no_1240	m154625/1313/CCS|F;size=1	m227289/866/CCS|F;size=1	447	ITS2	no	500	583	500	0.767
chimera_m395025/842/CCS|F;size=1_and_m160603/1047/CCS|F;size=1_at_198_5.8S_reversed_no_1241	m395025/842/CCS|F;size=1	m160603/1047/CCS|F;size=1	198	5.8S	no	518	494	518	0.401
chimera_m26754/1151/CCS|F;size=1_and_m20429/1830/CCS|F;size=1_at_40_ITS1_reversed_no_1242	m26754/1151/CCS|F;size=1	m20429/1830/CCS|F;size=1	40	ITS1	no	597	415	597	0.096
chimera_m50976/839/CCS|F;size=1_and_m130176/526/CCS|F;size=1_at_113_ITS1_reversed_no_1243	m50976/839/CCS|F;size=1	m130176/526/CCS|F;size=1	113	ITS1	no	526	509	526	0.222
chimera_m162152/1549/CCS|F;size=1_and_m159905/1326/CCS|F;size=1_at_278_5.8S_reversed_no_1244	m162152/1549/CCS|F;size=1	m159905/1326/CCS|F;size=1	278	5.8S	no	759	730	759	0.381
chimera_m57412/974/CCS|F;size=3_and_m86133/977/CCS|F;size=1_at_286_ITS2_reversed_no_1245	m57412/974/CCS|F;size=3	m86133/977/CCS|F;size=1	286	ITS2	no	628	497	628	0.575
chimera_m144776/1176/CCS|F;size=1_and_m327848/1017/CCS|F;size=1_at_414_ITS2_reversed_yes_1246	m144776/1176/CCS|F;size=1	m327848/1017/CCS|F;size=1	414	ITS2	yes	477	555	477	0.746
chimera_m85870/410/CCS|F;size=1_and_m213354/743/CCS|F;size=1_at_279_ITS2_reversed_yes_1247	m85870/410/CCS|F;size=1	m213354/743/CCS|F;size=1	279	ITS2	yes	501	410	501	0.68
chimera_m190260/469/CCS|F;size=1_and_m343546/1399/CCS|F;size=1_at_342_ITS2_reversed_no_1248	m190260/469/CCS|F;size=1	m343546/1399/CCS|F;size=1	342	ITS2	no	449	469	449	0.729
chimera_m246228/1332/CCS|F;size=1_and_m87926/569/CCS|F;size=1_at_173_ITS1_reversed_no_1249	m246228/1332/CCS|F;size=1	m87926/569/CCS|F;size=1	173	ITS1	no	505	721	505	0.24
chimera_m268549/1538/CCS|F;size=1_and_m393723/1071/CCS|F;size=1_at_330_5.8S_reversed_no_1250	m268549/1538/CCS|F;size=1	m393723/1071/CCS|F;size=1	330	5.8S	no	492	688	492	0.48
chimera_m109420/750/CCS|F;size=1_and_m220779/491/CCS|F;size=1_at_81_ITS1_reversed_no_1251	m109420/750/CCS|F;size=1	m220779/491/CCS|F;size=1	81	ITS1	no	491	624	491	0.13
chimera_m40875/884/CCS|F;size=1_and_m35643/467/CCS|F;size=1_at_356_ITS2_reversed_no_1252	m40875/884/CCS|F;size=1	m35643/467/CCS|F;size=1	356	ITS2	no	467	608	467	0.586
chimera_m243868/714/CCS|F;size=1_and_m68652/686/CCS|F;size=2_at_176_ITS1_reversed_no_1253	m243868/714/CCS|F;size=1	m68652/686/CCS|F;size=2	176	ITS1	no	639	631	639	0.279
chimera_m193162/1066/CCS|F;size=1_and_m55944/757/CCS|F;size=1_at_197_5.8S_reversed_no_1254	m193162/1066/CCS|F;size=1	m55944/757/CCS|F;size=1	197	5.8S	no	644	504	644	0.391
chimera_m57938/1058/CCS|F;size=2_and_m220721/1818/CCS|F;size=1_at_396_ITS2_reversed_no_1255	m57938/1058/CCS|F;size=2	m220721/1818/CCS|F;size=1	396	ITS2	no	547	628	547	0.631
chimera_m187348/616/CCS|F;size=1_and_m59112/1075/CCS|F;size=1_at_322_ITS2_reversed_no_1256	m187348/616/CCS|F;size=1	m59112/1075/CCS|F;size=1	322	ITS2	no	515	450	515	0.716
chimera_m80128/655/CCS|F;size=1_and_m6513/514/CCS|F;size=1_at_336_ITS2_reversed_yes_1257	m80128/655/CCS|F;size=1	m6513/514/CCS|F;size=1	336	ITS2	yes	487	472	487	0.712
chimera_m118844/1668/CCS|F;size=1_and_m49075/1013/CCS|F;size=1_at_197_5.8S_reversed_yes_1258	m118844/1668/CCS|F;size=1	m49075/1013/CCS|F;size=1	197	5.8S	yes	492	466	492	0.423
chimera_m157640/286/CCS|F;size=1_and_m214988/687/CCS|F;size=1_at_232_ITS2_reversed_no_1259	m157640/286/CCS|F;size=1	m214988/687/CCS|F;size=1	232	ITS2	no	414	286	414	0.811
chimera_m291233/1400/CCS|F;size=1_and_m202637/1282/CCS|F;size=2_at_179_5.8S_reversed_no_1260	m291233/1400/CCS|F;size=1	m202637/1282/CCS|F;size=2	179	5.8S	no	526	506	526	0.354
chimera_m201534/838/CCS|F;size=2_and_m14542/716/CCS|F;size=1_at_123_ITS1_reversed_no_1261	m201534/838/CCS|F;size=2	m14542/716/CCS|F;size=1	123	ITS1	no	453	405	453	0.304
chimera_m57643/773/CCS|F;size=2_and_m241612/914/CCS|F;size=1_at_69_ITS1_reversed_no_1262	m57643/773/CCS|F;size=2	m241612/914/CCS|F;size=1	69	ITS1	no	643	534	643	0.129
chimera_m252724/916/CCS|F;size=1_and_m195768/477/CCS|F;size=1_at_375_ITS2_reversed_no_1263	m252724/916/CCS|F;size=1	m195768/477/CCS|F;size=1	375	ITS2	no	477	655	477	0.573
chimera_m16384/634/CCS|F;size=2_and_m218497/1301/CCS|F;size=1_at_350_ITS2_reversed_no_1264	m16384/634/CCS|F;size=2	m218497/1301/CCS|F;size=1	350	ITS2	no	371	466	371	0.751
chimera_m138591/1422/CCS|F;size=2_and_m47550/510/CCS|F;size=1_at_256_ITS2_reversed_no_1265	m138591/1422/CCS|F;size=2	m47550/510/CCS|F;size=1	256	ITS2	no	444	532	444	0.481
chimera_m26116/1297/CCS|F;size=1_and_m22068/1244/CCS|F;size=1_at_372_ITS2_reversed_no_1266	m26116/1297/CCS|F;size=1	m22068/1244/CCS|F;size=1	372	ITS2	no	520	559	520	0.665
chimera_m58335/981/CCS|F;size=2_and_m12324/958/CCS|F;size=1_at_127_ITS1_reversed_no_1267	m58335/981/CCS|F;size=2	m12324/958/CCS|F;size=1	127	ITS1	no	590	567	590	0.224
chimera_m247585/734/CCS|F;size=1_and_m81085/534/CCS|F;size=1_at_246_ITS2_reversed_no_1268	m247585/734/CCS|F;size=1	m81085/534/CCS|F;size=1	246	ITS2	no	534	374	534	0.658
chimera_m104761/1222/CCS|F;size=1_and_m26604/1266/CCS|F;size=2_at_182_ITS1_reversed_yes_1269	m104761/1222/CCS|F;size=1	m26604/1266/CCS|F;size=2	182	ITS1	yes	479	534	479	0.341
chimera_m242967/684/CCS|F;size=1_and_m4770/1410/CCS|F;size=1_at_320_ITS2_reversed_no_1270	m242967/684/CCS|F;size=1	m4770/1410/CCS|F;size=1	320	ITS2	no	540	480	540	0.667
chimera_m48084/1187/CCS|F;size=1_and_m176266/767/CCS|F;size=1_at_118_ITS1_reversed_no_1271	m48084/1187/CCS|F;size=1	m176266/767/CCS|F;size=1	118	ITS1	no	498	736	498	0.16
chimera_m79248/901/CCS|F;size=1_and_m333284/721/CCS|F;size=1_at_441_ITS2_reversed_no_1272	m79248/901/CCS|F;size=1	m333284/721/CCS|F;size=1	441	ITS2	no	515	591	515	0.746
chimera_m88008/1254/CCS|F;size=1_and_m33478/1286/CCS|F;size=1_at_130_ITS1_reversed_no_1273	m88008/1254/CCS|F;size=1	m33478/1286/CCS|F;size=1	130	ITS1	no	544	562	544	0.231
chimera_m251780/1407/CCS|F;size=1_and_m102430/896/CCS|F;size=1_at_327_ITS2_reversed_no_1274	m251780/1407/CCS|F;size=1	m102430/896/CCS|F;size=1	327	ITS2	no	506	583	506	0.561
chimera_m79070/1201/CCS|F;size=1_and_m285830/956/CCS|F;size=1_at_127_ITS1_reversed_no_1275	m79070/1201/CCS|F;size=1	m285830/956/CCS|F;size=1	127	ITS1	no	396	461	396	0.275
chimera_m200059/661/CCS|F;size=1_and_m173850/1710/CCS|F;size=1_at_72_ITS1_reversed_no_1276	m200059/661/CCS|F;size=1	m173850/1710/CCS|F;size=1	72	ITS1	no	495	516	495	0.14
chimera_m184001/1018/CCS|F;size=1_and_m283343/1887/CCS|F;size=1_at_162_ITS1_reversed_no_1277	m184001/1018/CCS|F;size=1	m283343/1887/CCS|F;size=1	162	ITS1	no	619	607	619	0.267
chimera_m197107/899/CCS|F;size=1_and_m456705/1157/CCS|F;size=1_at_304_ITS2_reversed_no_1278	m197107/899/CCS|F;size=1	m456705/1157/CCS|F;size=1	304	ITS2	no	682	552	682	0.551
chimera_m33480/603/CCS|F;size=1_and_m138651/503/CCS|F;size=1_at_64_ITS1_reversed_no_1279	m33480/603/CCS|F;size=1	m138651/503/CCS|F;size=1	64	ITS1	no	503	503	503	0.127
chimera_m90597/574/CCS|F;size=1_and_m116876/1139/CCS|F;size=1_at_411_ITS2_reversed_no_1280	m90597/574/CCS|F;size=1	m116876/1139/CCS|F;size=1	411	ITS2	no	596	574	596	0.716
chimera_m330275/847/CCS|F;size=1_and_m212210/672/CCS|F;size=2_at_128_ITS1_reversed_no_1281	m330275/847/CCS|F;size=1	m212210/672/CCS|F;size=2	128	ITS1	no	502	549	502	0.233
chimera_m221241/1362/CCS|F;size=1_and_m46599/866/CCS|F;size=1_at_214_5.8S_reversed_no_1282	m221241/1362/CCS|F;size=1	m46599/866/CCS|F;size=1	214	5.8S	no	615	484	615	0.442
chimera_m157051/1417/CCS|F;size=1_and_m12448/484/CCS|F;size=2_at_263_5.8S_reversed_no_1283	m157051/1417/CCS|F;size=1	m12448/484/CCS|F;size=2	263	5.8S	no	440	622	440	0.423
chimera_m127272/977/CCS|F;size=1_and_m13408/683/CCS|F;size=1_at_344_ITS2_reversed_no_1284	m127272/977/CCS|F;size=1	m13408/683/CCS|F;size=1	344	ITS2	no	453	464	453	0.741
chimera_m51023/875/CCS|F;size=1_and_m67221/769/CCS|F;size=1_at_105_ITS1_reversed_no_1285	m51023/875/CCS|F;size=1	m67221/769/CCS|F;size=1	105	ITS1	no	465	516	465	0.203
chimera_m186665/1750/CCS|F;size=1_and_m79418/929/CCS|F;size=1_at_240_ITS2_reversed_no_1286	m186665/1750/CCS|F;size=1	m79418/929/CCS|F;size=1	240	ITS2	no	577	455	577	0.527
chimera_m86217/576/CCS|F;size=1_and_m86919/643/CCS|F;size=1_at_158_ITS1_reversed_no_1287	m86217/576/CCS|F;size=1	m86919/643/CCS|F;size=1	158	ITS1	no	643	482	643	0.328
chimera_m52977/840/CCS|F;size=1_and_m55500/955/CCS|F;size=1_at_370_ITS2_reversed_no_1288	m52977/840/CCS|F;size=1	m55500/955/CCS|F;size=1	370	ITS2	no	912	548	912	0.675
chimera_m129329/1297/CCS|F;size=1_and_m161185/1274/CCS|F;size=1_at_338_ITS2_reversed_no_1289	m129329/1297/CCS|F;size=1	m161185/1274/CCS|F;size=1	338	ITS2	no	491	574	491	0.589
chimera_m430167/1393/CCS|T;size=1_and_m41506/1785/CCS|F;size=1_at_443_ITS2_reversed_no_1290	m430167/1393/CCS|T;size=1	m41506/1785/CCS|F;size=1	443	ITS2	no	1195	759	1195	0.584
chimera_m273913/1141/CCS|F;size=1_and_m92981/1537/CCS|F;size=1_at_401_ITS2_reversed_no_1291	m273913/1141/CCS|F;size=1	m92981/1537/CCS|F;size=1	401	ITS2	no	567	607	567	0.661
chimera_m374707/1009/CCS|F;size=1_and_m237120/604/CCS|F;size=1_at_88_ITS1_reversed_no_1292	m374707/1009/CCS|F;size=1	m237120/604/CCS|F;size=1	88	ITS1	no	604	553	604	0.159
chimera_m100951/324/CCS|F;size=1_and_m5521/828/CCS|F;size=1_at_57_ITS1_reversed_no_1293	m100951/324/CCS|F;size=1	m5521/828/CCS|F;size=1	57	ITS1	no	437	324	437	0.176
chimera_m317586/1452/CCS|F;size=1_and_m17601/1588/CCS|F;size=1_at_135_ITS1_reversed_no_1294	m317586/1452/CCS|F;size=1	m17601/1588/CCS|F;size=1	135	ITS1	no	673	606	673	0.223
chimera_m147383/1193/CCS|F;size=1_and_m246653/997/CCS|F;size=1_at_161_ITS1_reversed_no_1295	m147383/1193/CCS|F;size=1	m246653/997/CCS|F;size=1	161	ITS1	no	437	538	437	0.299
chimera_m39892/615/CCS|F;size=2_and_m159219/858/CCS|F;size=1_at_278_ITS2_reversed_no_1296	m39892/615/CCS|F;size=2	m159219/858/CCS|F;size=1	278	ITS2	no	501	504	501	0.552
chimera_m328076/1297/CCS|F;size=1_and_m232400/763/CCS|F;size=1_at_504_ITS2_reversed_no_1297	m328076/1297/CCS|F;size=1	m232400/763/CCS|F;size=1	504	ITS2	no	504	671	499	0.751
chimera_m100009/797/CCS|F;size=1_and_m335157/761/CCS|F;size=1_at_267_ITS2_reversed_no_1298	m100009/797/CCS|F;size=1	m335157/761/CCS|F;size=1	267	ITS2	no	659	526	659	0.508
chimera_m38046/1615/CCS|F;size=1_and_m116572/1093/CCS|F;size=1_at_149_ITS1_reversed_no_1299	m38046/1615/CCS|F;size=1	m116572/1093/CCS|F;size=1	149	ITS1	no	753	579	753	0.257
chimera_m76670/1155/CCS|F;size=1_and_m194978/1262/CCS|F;size=1_at_87_ITS1_reversed_no_1300	m76670/1155/CCS|F;size=1	m194978/1262/CCS|F;size=1	87	ITS1	no	602	519	602	0.168
chimera_m47292/648/CCS|F;size=2_and_m171476/578/CCS|F;size=1_at_340_ITS2_reversed_no_1301	m47292/648/CCS|F;size=2	m171476/578/CCS|F;size=1	340	ITS2	no	461	403	461	0.844
chimera_m46599/866/CCS|F;size=1_and_m153510/828/CCS|F;size=1_at_418_ITS2_reversed_no_1302	m46599/866/CCS|F;size=1	m153510/828/CCS|F;size=1	418	ITS2	no	584	615	584	0.68
chimera_m299260/1367/CCS|F;size=1_and_m279500/792/CCS|F;size=1_at_391_ITS2_reversed_no_1303	m299260/1367/CCS|F;size=1	m279500/792/CCS|F;size=1	391	ITS2	no	509	540	509	0.724
chimera_m103567/824/CCS|F;size=1_and_m231783/470/CCS|F;size=1_at_264_ITS1_reversed_no_1304	m103567/824/CCS|F;size=1	m231783/470/CCS|F;size=1	264	ITS1	no	470	824	470	0.32
chimera_m326773/1036/CCS|F;size=1_and_m181519/1114/CCS|F;size=1_at_53_ITS1_reversed_no_1305	m326773/1036/CCS|F;size=1	m181519/1114/CCS|F;size=1	53	ITS1	no	596	598	596	0.089
chimera_m13523/1250/CCS|F;size=1_and_m83443/1122/CCS|F;size=1_at_170_ITS1_reversed_no_1306	m13523/1250/CCS|F;size=1	m83443/1122/CCS|F;size=1	170	ITS1	no	469	647	469	0.263
chimera_m196831/380/CCS|F;size=1_and_m141064/664/CCS|F;size=1_at_48_ITS1_reversed_no_1307	m196831/380/CCS|F;size=1	m141064/664/CCS|F;size=1	48	ITS1	no	542	380	542	0.126
chimera_m179671/582/CCS|F;size=1_and_m90156/854/CCS|F;size=1_at_119_ITS1_reversed_no_1308	m179671/582/CCS|F;size=1	m90156/854/CCS|F;size=1	119	ITS1	no	443	439	443	0.271
chimera_m171975/930/CCS|F;size=1_and_m337882/1478/CCS|F;size=1_at_280_ITS2_reversed_yes_1309	m171975/930/CCS|F;size=1	m337882/1478/CCS|F;size=1	280	ITS2	yes	424	522	424	0.536
chimera_m137072/516/CCS|F;size=1_and_m17965/1597/CCS|F;size=1_at_207_5.8S_reversed_no_1310	m137072/516/CCS|F;size=1	m17965/1597/CCS|F;size=1	207	5.8S	no	482	472	482	0.439
chimera_m111915/1358/CCS|T;size=1_and_m87601/597/CCS|F;size=1_at_213_ITS2_reversed_no_1311	m111915/1358/CCS|T;size=1	m87601/597/CCS|F;size=1	213	ITS2	no	597	434	597	0.491
chimera_m97652/883/CCS|F;size=1_and_m31128/742/CCS|F;size=1_at_166_ITS1_reversed_no_1312	m97652/883/CCS|F;size=1	m31128/742/CCS|F;size=1	166	ITS1	no	660	554	660	0.3
chimera_m221436/680/CCS|F;size=1_and_m46181/833/CCS|F;size=1_at_180_ITS1_reversed_no_1313	m221436/680/CCS|F;size=1	m46181/833/CCS|F;size=1	180	ITS1	no	431	553	431	0.325
chimera_m102430/1336/CCS|F;size=1_and_m12047/532/CCS|F;size=1_at_254_ITS2_reversed_no_1314	m102430/1336/CCS|F;size=1	m12047/532/CCS|F;size=1	254	ITS2	no	505	398	505	0.638
chimera_m161900/517/CCS|F;size=1_and_m243409/1155/CCS|F;size=1_at_62_ITS1_reversed_no_1315	m161900/517/CCS|F;size=1	m243409/1155/CCS|F;size=1	62	ITS1	no	462	517	462	0.12
chimera_m92191/494/CCS|F;size=1_and_m76663/1488/CCS|F;size=1_at_101_ITS1_reversed_no_1316	m92191/494/CCS|F;size=1	m76663/1488/CCS|F;size=1	101	ITS1	no	801	494	801	0.204
chimera_m111523/998/CCS|F;size=1_and_m125112/690/CCS|F;size=2_at_113_ITS1_reversed_no_1317	m111523/998/CCS|F;size=1	m125112/690/CCS|F;size=2	113	ITS1	no	481	432	481	0.262
chimera_m209405/856/CCS|F;size=1_and_m216900/614/CCS|F;size=1_at_51_ITS1_reversed_no_1318	m209405/856/CCS|F;size=1	m216900/614/CCS|F;size=1	51	ITS1	no	614	438	614	0.116
chimera_m84723/471/CCS|F;size=1_and_m220085/1993/CCS|F;size=1_at_383_ITS2_reversed_no_1319	m84723/471/CCS|F;size=1	m220085/1993/CCS|F;size=1	383	ITS2	no	533	471	533	0.813
chimera_m241402/869/CCS|F;size=1_and_m364727/1562/CCS|F;size=1_at_109_ITS1_reversed_no_1320	m241402/869/CCS|F;size=1	m364727/1562/CCS|F;size=1	109	ITS1	no	607	449	607	0.243
chimera_m247032/1689/CCS|F;size=1_and_m203920/1043/CCS|F;size=1_at_227_ITS1_reversed_no_1321	m247032/1689/CCS|F;size=1	m203920/1043/CCS|F;size=1	227	ITS1	no	526	851	526	0.267
chimera_m398895/646/CCS|F;size=1_and_m291107/1135/CCS|F;size=1_at_305_ITS2_reversed_yes_1322	m398895/646/CCS|F;size=1	m291107/1135/CCS|F;size=1	305	ITS2	yes	554	537	554	0.568
chimera_m203782/537/CCS|F;size=1_and_m26289/1103/CCS|F;size=1_at_264_ITS2_reversed_no_1323	m203782/537/CCS|F;size=1	m26289/1103/CCS|F;size=1	264	ITS2	no	546	537	546	0.492
chimera_m165598/465/CCS|F;size=1_and_m336428/1025/CCS|F;size=1_at_214_5.8S_reversed_no_1324	m165598/465/CCS|F;size=1	m336428/1025/CCS|F;size=1	214	5.8S	no	464	465	464	0.46
chimera_m194619/927/CCS|F;size=1_and_m9462/981/CCS|F;size=2_at_511_ITS2_reversed_no_1325	m194619/927/CCS|F;size=1	m9462/981/CCS|F;size=2	511	ITS2	no	511	716	491	0.714
chimera_m258919/653/CCS|F;size=1_and_m145695/1002/CCS|F;size=1_at_80_ITS1_reversed_no_1326	m258919/653/CCS|F;size=1	m145695/1002/CCS|F;size=1	80	ITS1	no	586	423	586	0.189
chimera_m209235/709/CCS|F;size=1_and_m194309/595/CCS|F;size=1_at_83_ITS1_reversed_no_1327	m209235/709/CCS|F;size=1	m194309/595/CCS|F;size=1	83	ITS1	no	512	451	512	0.184
chimera_m279900/1104/CCS|F;size=1_and_m259968/494/CCS|F;size=1_at_354_ITS2_reversed_no_1328	m279900/1104/CCS|F;size=1	m259968/494/CCS|F;size=1	354	ITS2	no	494	494	494	0.717
chimera_m208568/918/CCS|F;size=1_and_m438084/535/CCS|F;size=1_at_502_ITS2_reversed_yes_1329	m208568/918/CCS|F;size=1	m438084/535/CCS|F;size=1	502	ITS2	yes	502	603	412	0.833
chimera_m159952/556/CCS|F;size=1_and_m91296/1089/CCS|F;size=1_at_124_ITS1_reversed_no_1330	m159952/556/CCS|F;size=1	m91296/1089/CCS|F;size=1	124	ITS1	no	722	556	722	0.223
chimera_m267509/556/CCS|F;size=1_and_m356092/622/CCS|F;size=1_at_87_ITS1_reversed_no_1331	m267509/556/CCS|F;size=1	m356092/622/CCS|F;size=1	87	ITS1	no	622	511	622	0.17
chimera_m273307/688/CCS|F;size=1_and_m56453/1111/CCS|F;size=2_at_187_5.8S_reversed_no_1332	m273307/688/CCS|F;size=1	m56453/1111/CCS|F;size=2	187	5.8S	no	451	499	451	0.375
chimera_m147479/726/CCS|F;size=1_and_m100839/1491/CCS|F;size=1_at_286_ITS2_reversed_yes_1333	m147479/726/CCS|F;size=1	m100839/1491/CCS|F;size=1	286	ITS2	yes	555	470	555	0.609
chimera_m230714/1081/CCS|F;size=2_and_m254440/732/CCS|F;size=1_at_273_ITS2_reversed_no_1334	m230714/1081/CCS|F;size=2	m254440/732/CCS|F;size=1	273	ITS2	no	540	386	540	0.707
chimera_m117505/1475/CCS|F;size=1_and_m192356/796/CCS|F;size=1_at_65_ITS1_reversed_no_1335	m117505/1475/CCS|F;size=1	m192356/796/CCS|F;size=1	65	ITS1	no	674	756	674	0.086
chimera_m265412/679/CCS|F;size=1_and_m210898/588/CCS|F;size=1_at_344_ITS2_reversed_no_1336	m265412/679/CCS|F;size=1	m210898/588/CCS|F;size=1	344	ITS2	no	470	471	470	0.73
chimera_m163267/1205/CCS|F;size=1_and_m265522/747/CCS|F;size=1_at_177_ITS1_reversed_no_1337	m163267/1205/CCS|F;size=1	m265522/747/CCS|F;size=1	177	ITS1	no	511	633	511	0.28
chimera_m52862/633/CCS|F;size=1_and_m16896/833/CCS|F;size=1_at_543_ITS2_reversed_no_1338	m52862/633/CCS|F;size=1	m16896/833/CCS|F;size=1	543	ITS2	no	543	633	491	0.858
chimera_m282175/744/CCS|F;size=1_and_m224190/514/CCS|F;size=1_at_94_ITS1_reversed_no_1339	m282175/744/CCS|F;size=1	m224190/514/CCS|F;size=1	94	ITS1	no	514	491	514	0.191
chimera_m236412/493/CCS|F;size=1_and_m213949/507/CCS|F;size=1_at_96_ITS1_reversed_yes_1340	m236412/493/CCS|F;size=1	m213949/507/CCS|F;size=1	96	ITS1	yes	507	493	507	0.195
chimera_m361850/1078/CCS|F;size=1_and_m123904/555/CCS|F;size=1_at_386_ITS2_reversed_no_1341	m361850/1078/CCS|F;size=1	m123904/555/CCS|F;size=1	386	ITS2	no	492	509	492	0.758
chimera_m158194/1017/CCS|F;size=1_and_m193171/855/CCS|F;size=1_at_59_ITS1_reversed_no_1342	m158194/1017/CCS|F;size=1	m193171/855/CCS|F;size=1	59	ITS1	no	451	426	451	0.138
chimera_m83493/789/CCS|F;size=1_and_m197742/973/CCS|F;size=1_at_13_ITS1_reversed_no_1343	m83493/789/CCS|F;size=1	m197742/973/CCS|F;size=1	13	ITS1	no	591	545	591	0.024
chimera_m222501/999/CCS|F;size=1_and_m162392/1153/CCS|F;size=1_at_401_ITS2_reversed_no_1344	m222501/999/CCS|F;size=1	m162392/1153/CCS|F;size=1	401	ITS2	no	462	557	462	0.72
chimera_m112162/1054/CCS|F;size=1_and_m33480/603/CCS|F;size=1_at_421_ITS2_reversed_no_1345	m112162/1054/CCS|F;size=1	m33480/603/CCS|F;size=1	421	ITS2	no	503	671	503	0.627
chimera_m241126/842/CCS|F;size=1_and_m376858/1330/CCS|F;size=1_at_96_ITS1_reversed_no_1346	m241126/842/CCS|F;size=1	m376858/1330/CCS|F;size=1	96	ITS1	no	599	551	599	0.174
chimera_m120610/775/CCS|F;size=1_and_m277357/747/CCS|F;size=1_at_123_ITS1_reversed_no_1347	m120610/775/CCS|F;size=1	m277357/747/CCS|F;size=1	123	ITS1	no	477	541	477	0.227
chimera_m281141/1134/CCS|F;size=1_and_m117957/1095/CCS|F;size=1_at_227_ITS2_reversed_no_1348	m281141/1134/CCS|F;size=1	m117957/1095/CCS|F;size=1	227	ITS2	no	497	433	497	0.524
chimera_m100203/465/CCS|F;size=1_and_m61515/434/CCS|F;size=1_at_230_ITS2_reversed_no_1349	m100203/465/CCS|F;size=1	m61515/434/CCS|F;size=1	230	ITS2	no	434	465	434	0.495
chimera_m286997/1840/CCS|F;size=1_and_m128565/1569/CCS|F;size=1_at_125_ITS1_reversed_no_1350	m286997/1840/CCS|F;size=1	m128565/1569/CCS|F;size=1	125	ITS1	no	585	601	585	0.208
chimera_m184876/1222/CCS|F;size=1_and_m253408/1703/CCS|F;size=1_at_339_ITS2_reversed_no_1351	m184876/1222/CCS|F;size=1	m253408/1703/CCS|F;size=1	339	ITS2	no	548	570	548	0.595
chimera_m222842/1510/CCS|F;size=2_and_m69808/1162/CCS|F;size=1_at_355_ITS2_reversed_no_1352	m222842/1510/CCS|F;size=2	m69808/1162/CCS|F;size=1	355	ITS2	no	589	512	589	0.693
chimera_m44187/996/CCS|F;size=1_and_m289312/1112/CCS|T;size=2_at_99_ITS1_reversed_no_1353	m44187/996/CCS|F;size=1	m289312/1112/CCS|T;size=2	99	ITS1	no	374	576	374	0.172
chimera_m70879/862/CCS|F;size=1_and_m172994/1037/CCS|F;size=1_at_28_ITS1_reversed_no_1354	m70879/862/CCS|F;size=1	m172994/1037/CCS|F;size=1	28	ITS1	no	560	524	560	0.053
chimera_m192813/916/CCS|F;size=1_and_m247071/553/CCS|F;size=1_at_78_ITS1_reversed_no_1355	m192813/916/CCS|F;size=1	m247071/553/CCS|F;size=1	78	ITS1	no	514	462	514	0.169
chimera_m120237/568/CCS|F;size=1_and_m195560/1030/CCS|F;size=1_at_140_ITS1_reversed_no_1356	m120237/568/CCS|F;size=1	m195560/1030/CCS|F;size=1	140	ITS1	no	730	568	730	0.246
chimera_m20691/1570/CCS|F;size=1_and_m65424/1013/CCS|F;size=1_at_347_ITS2_reversed_no_1357	m20691/1570/CCS|F;size=1	m65424/1013/CCS|F;size=1	347	ITS2	no	442	520	442	0.667
chimera_m354982/886/CCS|F;size=1_and_m137627/1241/CCS|F;size=1_at_364_ITS2_reversed_no_1358	m354982/886/CCS|F;size=1	m137627/1241/CCS|F;size=1	364	ITS2	no	613	601	613	0.606
chimera_m52738/421/CCS|F;size=1_and_m119792/500/CCS|F;size=1_at_268_ITS2_reversed_no_1359	m52738/421/CCS|F;size=1	m119792/500/CCS|F;size=1	268	ITS2	no	500	421	500	0.637
chimera_m265951/945/CCS|F;size=1_and_m127336/804/CCS|F;size=1_at_303_ITS2_reversed_no_1360	m265951/945/CCS|F;size=1	m127336/804/CCS|F;size=1	303	ITS2	no	522	465	522	0.652
chimera_m82315/1125/CCS|F;size=1_and_m198059/1938/CCS|F;size=2_at_367_ITS2_reversed_no_1361	m82315/1125/CCS|F;size=1	m198059/1938/CCS|F;size=2	367	ITS2	no	565	578	565	0.635
chimera_m298602/1469/CCS|F;size=1_and_m69916/1104/CCS|F;size=1_at_37_ITS1_reversed_yes_1362	m298602/1469/CCS|F;size=1	m69916/1104/CCS|F;size=1	37	ITS1	yes	544	485	544	0.076
chimera_m82213/521/CCS|F;size=1_and_m93818/509/CCS|F;size=1_at_279_ITS2_reversed_no_1363	m82213/521/CCS|F;size=1	m93818/509/CCS|F;size=1	279	ITS2	no	440	521	440	0.536
chimera_m1391/737/CCS|F;size=1_and_m95071/484/CCS|F;size=1_at_131_ITS1_reversed_no_1364	m1391/737/CCS|F;size=1	m95071/484/CCS|F;size=1	131	ITS1	no	484	556	484	0.236
chimera_m327988/1528/CCS|F;size=1_and_m90702/533/CCS|F;size=1_at_296_ITS2_reversed_no_1365	m327988/1528/CCS|F;size=1	m90702/533/CCS|F;size=1	296	ITS2	no	465	579	465	0.511
chimera_m29779/722/CCS|F;size=1_and_m151285/448/CCS|F;size=1_at_294_ITS2_reversed_no_1366	m29779/722/CCS|F;size=1	m151285/448/CCS|F;size=1	294	ITS2	no	418	435	418	0.676
chimera_m233013/756/CCS|F;size=1_and_m16682/745/CCS|F;size=1_at_251_ITS2_reversed_no_1367	m233013/756/CCS|F;size=1	m16682/745/CCS|F;size=1	251	ITS2	no	495	418	495	0.6
chimera_m35686/724/CCS|F;size=1_and_m141013/1480/CCS|F;size=1_at_357_ITS2_reversed_no_1368	m35686/724/CCS|F;size=1	m141013/1480/CCS|F;size=1	357	ITS2	no	435	516	435	0.692
chimera_m164628/1160/CCS|F;size=1_and_m138025/1324/CCS|F;size=1_at_303_5.8S_reversed_no_1369	m164628/1160/CCS|F;size=1	m138025/1324/CCS|F;size=1	303	5.8S	no	534	668	534	0.454
chimera_m31952/626/CCS|F;size=1_and_m63907/568/CCS|F;size=1_at_351_ITS2_reversed_no_1370	m31952/626/CCS|F;size=1	m63907/568/CCS|F;size=1	351	ITS2	no	568	574	568	0.611
chimera_m95015/1068/CCS|F;size=1_and_m183261/1142/CCS|F;size=1_at_380_ITS2_reversed_yes_1371	m95015/1068/CCS|F;size=1	m183261/1142/CCS|F;size=1	380	ITS2	yes	579	574	579	0.662
chimera_m114528/881/CCS|F;size=1_and_m31175/426/CCS|F;size=1_at_364_ITS2_reversed_no_1372	m114528/881/CCS|F;size=1	m31175/426/CCS|F;size=1	364	ITS2	no	382	527	382	0.691
chimera_m306718/634/CCS|F;size=1_and_m81310/819/CCS|F;size=1_at_466_ITS2_reversed_no_1373	m306718/634/CCS|F;size=1	m81310/819/CCS|F;size=1	466	ITS2	no	592	565	592	0.825
chimera_m86179/1149/CCS|F;size=1_and_m48946/1031/CCS|F;size=1_at_130_ITS1_reversed_no_1374	m86179/1149/CCS|F;size=1	m48946/1031/CCS|F;size=1	130	ITS1	no	572	507	572	0.256
chimera_m163656/1351/CCS|F;size=1_and_m369404/1494/CCS|F;size=1_at_125_ITS1_reversed_no_1375	m163656/1351/CCS|F;size=1	m369404/1494/CCS|F;size=1	125	ITS1	no	462	502	462	0.249
chimera_m133495/1786/CCS|F;size=1_and_m91636/663/CCS|F;size=1_at_347_ITS2_reversed_no_1376	m133495/1786/CCS|F;size=1	m91636/663/CCS|F;size=1	347	ITS2	no	663	546	663	0.636
chimera_m17562/566/CCS|F;size=3_and_m111111/1413/CCS|F;size=1_at_118_ITS1_reversed_no_1377	m17562/566/CCS|F;size=3	m111111/1413/CCS|F;size=1	118	ITS1	no	425	450	425	0.262
chimera_m74098/892/CCS|F;size=2_and_m245781/577/CCS|F;size=1_at_446_ITS2_reversed_no_1378	m74098/892/CCS|F;size=2	m245781/577/CCS|F;size=1	446	ITS2	no	458	564	458	0.791
chimera_m46585/1318/CCS|F;size=1_and_m276261/687/CCS|F;size=1_at_381_ITS2_reversed_no_1379	m46585/1318/CCS|F;size=1	m276261/687/CCS|F;size=1	381	ITS2	no	687	482	687	0.79
chimera_m200638/403/CCS|F;size=1_and_m226408/1102/CCS|F;size=1_at_113_ITS1_reversed_no_1380	m200638/403/CCS|F;size=1	m226408/1102/CCS|F;size=1	113	ITS1	no	435	403	435	0.28
chimera_m80440/574/CCS|F;size=1_and_m28526/624/CCS|F;size=1_at_271_ITS2_reversed_no_1381	m80440/574/CCS|F;size=1	m28526/624/CCS|F;size=1	271	ITS2	no	463	507	463	0.535
chimera_m297604/400/CCS|F;size=1_and_m276661/1022/CCS|F;size=2_at_140_ITS1_reversed_no_1382	m297604/400/CCS|F;size=1	m276661/1022/CCS|F;size=2	140	ITS1	no	523	400	523	0.35
chimera_m92943/610/CCS|F;size=1_and_m45789/752/CCS|F;size=1_at_284_ITS2_reversed_yes_1383	m92943/610/CCS|F;size=1	m45789/752/CCS|F;size=1	284	ITS2	yes	574	517	574	0.549
chimera_m39763/625/CCS|F;size=2_and_m263026/1290/CCS|F;size=1_at_126_ITS1_reversed_no_1384	m39763/625/CCS|F;size=2	m263026/1290/CCS|F;size=1	126	ITS1	no	502	470	502	0.268
chimera_m138990/635/CCS|F;size=1_and_m111636/423/CCS|F;size=1_at_60_ITS1_reversed_yes_1385	m138990/635/CCS|F;size=1	m111636/423/CCS|F;size=1	60	ITS1	yes	423	543	423	0.11
chimera_m426050/647/CCS|T;size=2_and_m60501/538/CCS|F;size=1_at_154_ITS1_reversed_no_1386	m426050/647/CCS|T;size=2	m60501/538/CCS|F;size=1	154	ITS1	no	538	441	538	0.349
chimera_m106513/1004/CCS|F;size=1_and_m76033/428/CCS|F;size=1_at_212_5.8S_reversed_no_1387	m106513/1004/CCS|F;size=1	m76033/428/CCS|F;size=1	212	5.8S	no	428	485	428	0.437
chimera_m71852/464/CCS|F;size=1_and_m26695/894/CCS|F;size=1_at_324_ITS2_reversed_no_1388	m71852/464/CCS|F;size=1	m26695/894/CCS|F;size=1	324	ITS2	no	583	464	583	0.698
chimera_m66447/524/CCS|F;size=1_and_m100673/1261/CCS|F;size=1_at_321_ITS2_reversed_no_1389	m66447/524/CCS|F;size=1	m100673/1261/CCS|F;size=1	321	ITS2	no	501	524	501	0.613
chimera_m73658/915/CCS|F;size=1_and_m262123/728/CCS|F;size=1_at_266_ITS2_reversed_no_1390	m73658/915/CCS|F;size=1	m262123/728/CCS|F;size=1	266	ITS2	no	428	453	428	0.587
chimera_m291009/1647/CCS|F;size=4_and_m192678/953/CCS|F;size=1_at_335_ITS2_reversed_no_1391	m291009/1647/CCS|F;size=4	m192678/953/CCS|F;size=1	335	ITS2	no	546	494	546	0.678
chimera_m12330/1396/CCS|F;size=1_and_m44380/475/CCS|F;size=1_at_188_ITS1_reversed_no_1392	m12330/1396/CCS|F;size=1	m44380/475/CCS|F;size=1	188	ITS1	no	475	732	475	0.257
chimera_m49850/1078/CCS|F;size=1_and_m192207/1410/CCS|F;size=2_at_292_ITS2_reversed_no_1393	m49850/1078/CCS|F;size=1	m192207/1410/CCS|F;size=2	292	ITS2	no	621	481	621	0.607
chimera_m387322/501/CCS|F;size=1_and_m68624/497/CCS|F;size=1_at_141_ITS1_reversed_no_1394	m387322/501/CCS|F;size=1	m68624/497/CCS|F;size=1	141	ITS1	no	497	501	497	0.281
chimera_m6112/1019/CCS|F;size=1_and_m369300/784/CCS|F;size=1_at_394_ITS2_reversed_no_1395	m6112/1019/CCS|F;size=1	m369300/784/CCS|F;size=1	394	ITS2	no	698	503	698	0.783
chimera_m85859/1078/CCS|F;size=1_and_m303510/2087/CCS|F;size=1_at_169_ITS1_reversed_no_1396	m85859/1078/CCS|F;size=1	m303510/2087/CCS|F;size=1	169	ITS1	no	603	551	603	0.307
chimera_m245011/893/CCS|F;size=1_and_m165806/557/CCS|F;size=1_at_247_ITS2_reversed_no_1397	m245011/893/CCS|F;size=1	m165806/557/CCS|F;size=1	247	ITS2	no	470	448	470	0.551
chimera_m347/1116/CCS|F;size=98_and_m1052/1277/CCS|F;size=1_at_161_ITS1_reversed_no_1398	m347/1116/CCS|F;size=98	m1052/1277/CCS|F;size=1	161	ITS1	no	501	574	501	0.28
chimera_m7938/1340/CCS|F;size=1_and_m177728/829/CCS|F;size=1_at_172_ITS1_reversed_no_1399	m7938/1340/CCS|F;size=1	m177728/829/CCS|F;size=1	172	ITS1	no	454	555	454	0.31
chimera_m110885/1562/CCS|F;size=1_and_m87525/1366/CCS|F;size=1_at_376_ITS2_reversed_no_1400	m110885/1562/CCS|F;size=1	m87525/1366/CCS|F;size=1	376	ITS2	no	485	497	485	0.757
chimera_m72324/784/CCS|F;size=1_and_m204480/1541/CCS|F;size=1_at_286_ITS2_reversed_no_1401	m72324/784/CCS|F;size=1	m204480/1541/CCS|F;size=1	286	ITS2	no	728	495	728	0.578
chimera_m216150/1284/CCS|F;size=1_and_m307515/1306/CCS|F;size=1_at_169_ITS1_reversed_no_1402	m216150/1284/CCS|F;size=1	m307515/1306/CCS|F;size=1	169	ITS1	no	585	696	585	0.243
chimera_m258707/978/CCS|F;size=1_and_m207176/1291/CCS|F;size=1_at_402_ITS2_reversed_no_1403	m258707/978/CCS|F;size=1	m207176/1291/CCS|F;size=1	402	ITS2	no	483	641	483	0.627
chimera_m161867/402/CCS|F;size=1_and_m252974/1106/CCS|F;size=1_at_50_ITS1_reversed_no_1404	m161867/402/CCS|F;size=1	m252974/1106/CCS|F;size=1	50	ITS1	no	662	402	662	0.124
chimera_m300189/1140/CCS|F;size=1_and_m109178/1450/CCS|F;size=1_at_112_ITS1_reversed_no_1405	m300189/1140/CCS|F;size=1	m109178/1450/CCS|F;size=1	112	ITS1	no	670	674	670	0.166
chimera_m314854/1913/CCS|F;size=1_and_m261232/1598/CCS|F;size=3_at_167_ITS1_reversed_no_1406	m314854/1913/CCS|F;size=1	m261232/1598/CCS|F;size=3	167	ITS1	no	582	572	582	0.292
chimera_m445580/1032/CCS|T;size=1_and_m152543/1380/CCS|F;size=1_at_93_ITS1_reversed_no_1407	m445580/1032/CCS|T;size=1	m152543/1380/CCS|F;size=1	93	ITS1	no	494	414	494	0.225
chimera_m18663/1144/CCS|F;size=1_and_m113452/811/CCS|F;size=1_at_129_ITS1_reversed_no_1408	m18663/1144/CCS|F;size=1	m113452/811/CCS|F;size=1	129	ITS1	no	471	519	471	0.249
chimera_m312543/494/CCS|F;size=1_and_m245975/820/CCS|F;size=1_at_76_ITS1_reversed_no_1409	m312543/494/CCS|F;size=1	m245975/820/CCS|F;size=1	76	ITS1	no	646	494	646	0.154
chimera_m69967/469/CCS|F;size=1_and_m20428/692/CCS|F;size=1_at_376_ITS2_reversed_no_1410	m69967/469/CCS|F;size=1	m20428/692/CCS|F;size=1	376	ITS2	no	515	469	515	0.802
chimera_m59255/693/CCS|F;size=1_and_m144805/995/CCS|F;size=1_at_299_ITS2_reversed_no_1411	m59255/693/CCS|F;size=1	m144805/995/CCS|F;size=1	299	ITS2	no	429	400	429	0.748
chimera_m84159/500/CCS|F;size=1_and_m206924/605/CCS|F;size=1_at_116_ITS1_reversed_no_1412	m84159/500/CCS|F;size=1	m206924/605/CCS|F;size=1	116	ITS1	no	424	500	424	0.232
chimera_m234791/1210/CCS|F;size=2_and_m146981/1565/CCS|F;size=1_at_335_ITS2_reversed_no_1413	m234791/1210/CCS|F;size=2	m146981/1565/CCS|F;size=1	335	ITS2	no	500	453	500	0.74
chimera_m100407/1090/CCS|F;size=1_and_m267355/1397/CCS|F;size=1_at_390_ITS2_reversed_no_1414	m100407/1090/CCS|F;size=1	m267355/1397/CCS|F;size=1	390	ITS2	no	603	562	603	0.694
chimera_m236872/1222/CCS|F;size=1_and_m122141/653/CCS|F;size=1_at_388_ITS2_reversed_no_1415	m236872/1222/CCS|F;size=1	m122141/653/CCS|F;size=1	388	ITS2	no	552	648	552	0.599
chimera_m187388/1495/CCS|F;size=1_and_m150782/1421/CCS|F;size=1_at_395_ITS2_reversed_no_1416	m187388/1495/CCS|F;size=1	m150782/1421/CCS|F;size=1	395	ITS2	no	570	647	570	0.611
chimera_m227708/717/CCS|F;size=1_and_m167132/994/CCS|F;size=1_at_115_ITS1_reversed_no_1417	m227708/717/CCS|F;size=1	m167132/994/CCS|F;size=1	115	ITS1	no	737	504	737	0.228
chimera_m212224/1602/CCS|F;size=2_and_m238611/400/CCS|F;size=1_at_9_ITS1_reversed_no_1418	m212224/1602/CCS|F;size=2	m238611/400/CCS|F;size=1	9	ITS1	no	400	454	400	0.02
chimera_m428630/685/CCS|F;size=1_and_m84551/1293/CCS|F;size=2_at_46_ITS1_reversed_no_1419	m428630/685/CCS|F;size=1	m84551/1293/CCS|F;size=2	46	ITS1	no	689	477	689	0.096
chimera_m44145/772/CCS|F;size=1_and_m205609/432/CCS|F;size=1_at_130_ITS1_reversed_no_1420	m44145/772/CCS|F;size=1	m205609/432/CCS|F;size=1	130	ITS1	no	432	533	432	0.244
chimera_m106251/1013/CCS|F;size=1_and_m127657/1168/CCS|F;size=1_at_320_ITS2_reversed_no_1421	m106251/1013/CCS|F;size=1	m127657/1168/CCS|F;size=1	320	ITS2	no	674	515	674	0.621
chimera_m117026/1274/CCS|F;size=1_and_m309929/742/CCS|F;size=1_at_158_ITS1_reversed_no_1422	m117026/1274/CCS|F;size=1	m309929/742/CCS|F;size=1	158	ITS1	no	653	468	653	0.338
chimera_m43802/393/CCS|F;size=1_and_m162052/279/CCS|F;size=1_at_200_ITS2_reversed_no_1423	m43802/393/CCS|F;size=1	m162052/279/CCS|F;size=1	200	ITS2	no	279	393	279	0.509
chimera_m61094/1562/CCS|F;size=1_and_m223969/602/CCS|F;size=1_at_342_ITS2_reversed_no_1424	m61094/1562/CCS|F;size=1	m223969/602/CCS|F;size=1	342	ITS2	no	602	513	602	0.667
chimera_m120793/1049/CCS|F;size=2_and_m157060/859/CCS|F;size=1_at_239_5.8S_reversed_yes_1425	m120793/1049/CCS|F;size=2	m157060/859/CCS|F;size=1	239	5.8S	yes	492	498	492	0.48
chimera_m88570/424/CCS|F;size=1_and_m31699/1835/CCS|F;size=1_at_236_ITS2_reversed_no_1426	m88570/424/CCS|F;size=1	m31699/1835/CCS|F;size=1	236	ITS2	no	633	381	633	0.619
chimera_m150902/1127/CCS|F;size=1_and_m270922/737/CCS|F;size=1_at_183_ITS1_reversed_no_1427	m150902/1127/CCS|F;size=1	m270922/737/CCS|F;size=1	183	ITS1	no	633	637	633	0.287
chimera_m279500/792/CCS|F;size=1_and_m216369/1408/CCS|F;size=1_at_121_ITS1_reversed_no_1428	m279500/792/CCS|F;size=1	m216369/1408/CCS|F;size=1	121	ITS1	no	619	509	619	0.238
chimera_m189165/1231/CCS|F;size=1_and_m17915/1202/CCS|F;size=1_at_139_ITS1_reversed_no_1429	m189165/1231/CCS|F;size=1	m17915/1202/CCS|F;size=1	139	ITS1	no	535	599	535	0.232
chimera_m282301/1286/CCS|F;size=1_and_m265490/943/CCS|F;size=1_at_95_ITS1_reversed_no_1430	m282301/1286/CCS|F;size=1	m265490/943/CCS|F;size=1	95	ITS1	no	600	546	600	0.174
chimera_m208298/1356/CCS|F;size=1_and_m371291/837/CCS|F;size=1_at_253_ITS2_reversed_no_1431	m208298/1356/CCS|F;size=1	m371291/837/CCS|F;size=1	253	ITS2	no	514	479	514	0.528
chimera_m377365/1287/CCS|T;size=1_and_m245030/999/CCS|F;size=1_at_244_ITS2_reversed_no_1432	m377365/1287/CCS|T;size=1	m245030/999/CCS|F;size=1	244	ITS2	no	695	426	695	0.573
chimera_m153728/1396/CCS|F;size=1_and_m39094/1029/CCS|F;size=1_at_321_ITS2_reversed_no_1433	m153728/1396/CCS|F;size=1	m39094/1029/CCS|F;size=1	321	ITS2	no	810	507	810	0.633
chimera_m73795/632/CCS|F;size=1_and_m29397/921/CCS|F;size=2_at_299_ITS2_reversed_no_1434	m73795/632/CCS|F;size=1	m29397/921/CCS|F;size=2	299	ITS2	no	432	509	432	0.587
chimera_m2533/1456/CCS|F;size=99_and_m89401/466/CCS|F;size=1_at_406_ITS2_reversed_no_1435	m2533/1456/CCS|F;size=99	m89401/466/CCS|F;size=1	406	ITS2	no	466	576	466	0.705
chimera_m211694/985/CCS|F;size=1_and_m37861/1521/CCS|F;size=1_at_298_ITS2_reversed_no_1436	m211694/985/CCS|F;size=1	m37861/1521/CCS|F;size=1	298	ITS2	no	711	430	711	0.693
chimera_m70465/622/CCS|F;size=1_and_m53627/1559/CCS|F;size=1_at_352_ITS2_reversed_no_1437	m70465/622/CCS|F;size=1	m53627/1559/CCS|F;size=1	352	ITS2	no	554	497	554	0.708
chimera_m127183/1180/CCS|F;size=1_and_m274739/596/CCS|F;size=1_at_140_ITS1_reversed_no_1438	m127183/1180/CCS|F;size=1	m274739/596/CCS|F;size=1	140	ITS1	no	380	537	380	0.261
chimera_m76967/1111/CCS|F;size=1_and_m212064/1508/CCS|F;size=1_at_197_ITS1_reversed_no_1439	m76967/1111/CCS|F;size=1	m212064/1508/CCS|F;size=1	197	ITS1	no	528	649	528	0.304
chimera_m208034/1016/CCS|F;size=1_and_m239213/948/CCS|F;size=1_at_176_ITS1_reversed_no_1440	m208034/1016/CCS|F;size=1	m239213/948/CCS|F;size=1	176	ITS1	no	636	598	636	0.294
chimera_m39082/1103/CCS|F;size=1_and_m76696/394/CCS|F;size=1_at_190_ITS1_reversed_no_1441	m39082/1103/CCS|F;size=1	m76696/394/CCS|F;size=1	190	ITS1	no	364	579	364	0.328
chimera_m119060/605/CCS|F;size=1_and_m295608/1598/CCS|F;size=1_at_353_ITS2_reversed_no_1442	m119060/605/CCS|F;size=1	m295608/1598/CCS|F;size=1	353	ITS2	no	440	544	440	0.649
chimera_m214081/1446/CCS|F;size=1_and_m288144/844/CCS|F;size=1_at_120_ITS1_reversed_no_1443	m214081/1446/CCS|F;size=1	m288144/844/CCS|F;size=1	120	ITS1	no	586	447	586	0.268
chimera_m30504/674/CCS|F;size=1_and_m103811/513/CCS|F;size=1_at_291_ITS2_reversed_no_1444	m30504/674/CCS|F;size=1	m103811/513/CCS|F;size=1	291	ITS2	no	485	465	485	0.626
chimera_m282269/970/CCS|F;size=1_and_m75181/1214/CCS|F;size=1_at_114_ITS1_reversed_no_1445	m282269/970/CCS|F;size=1	m75181/1214/CCS|F;size=1	114	ITS1	no	560	451	560	0.253
chimera_m142210/714/CCS|F;size=1_and_m58099/573/CCS|F;size=1_at_266_ITS2_reversed_no_1446	m142210/714/CCS|F;size=1	m58099/573/CCS|F;size=1	266	ITS2	no	479	453	479	0.587
chimera_m76741/712/CCS|F;size=1_and_m188073/729/CCS|F;size=1_at_122_ITS1_reversed_no_1447	m76741/712/CCS|F;size=1	m188073/729/CCS|F;size=1	122	ITS1	no	729	574	729	0.213
chimera_m339396/1240/CCS|F;size=1_and_m51752/1365/CCS|F;size=1_at_337_ITS2_reversed_no_1448	m339396/1240/CCS|F;size=1	m51752/1365/CCS|F;size=1	337	ITS2	no	574	673	574	0.501
chimera_m46838/889/CCS|F;size=2_and_m53192/1140/CCS|F;size=2_at_207_ITS2_reversed_no_1449	m46838/889/CCS|F;size=2	m53192/1140/CCS|F;size=2	207	ITS2	no	545	414	545	0.5
chimera_m148874/591/CCS|F;size=1_and_m109943/1291/CCS|F;size=1_at_143_ITS1_reversed_no_1450	m148874/591/CCS|F;size=1	m109943/1291/CCS|F;size=1	143	ITS1	no	621	591	621	0.242
chimera_m262630/1781/CCS|F;size=1_and_m60921/1053/CCS|F;size=1_at_122_ITS1_reversed_no_1451	m262630/1781/CCS|F;size=1	m60921/1053/CCS|F;size=1	122	ITS1	no	486	604	486	0.202
chimera_m315334/1157/CCS|F;size=1_and_m192297/541/CCS|F;size=1_at_170_ITS1_reversed_no_1452	m315334/1157/CCS|F;size=1	m192297/541/CCS|F;size=1	170	ITS1	no	541	598	541	0.284
chimera_m176709/435/CCS|F;size=1_and_m149356/1657/CCS|F;size=1_at_285_ITS2_reversed_no_1453	m176709/435/CCS|F;size=1	m149356/1657/CCS|F;size=1	285	ITS2	no	570	435	570	0.655
chimera_m179739/820/CCS|F;size=1_and_m95745/678/CCS|F;size=1_at_169_ITS1_reversed_no_1454	m179739/820/CCS|F;size=1	m95745/678/CCS|F;size=1	169	ITS1	no	580	560	580	0.302
chimera_m430987/1117/CCS|F;size=1_and_m182731/377/CCS|F;size=1_at_422_ITS2_reversed_no_1455	m430987/1117/CCS|F;size=1	m182731/377/CCS|F;size=1	422	ITS2	no	422	600	377	0.703
chimera_m227708/717/CCS|F;size=1_and_m187385/753/CCS|F;size=1_at_339_ITS2_reversed_yes_1456	m227708/717/CCS|F;size=1	m187385/753/CCS|F;size=1	339	ITS2	yes	528	504	528	0.673
chimera_m24522/796/CCS|F;size=2_and_m214873/918/CCS|F;size=1_at_417_ITS2_reversed_no_1457	m24522/796/CCS|F;size=2	m214873/918/CCS|F;size=1	417	ITS2	no	615	619	615	0.674
chimera_m83130/1130/CCS|F;size=1_and_m92510/1949/CCS|F;size=1_at_413_ITS2_reversed_no_1458	m83130/1130/CCS|F;size=1	m92510/1949/CCS|F;size=1	413	ITS2	no	602	510	602	0.81
chimera_m394451/881/CCS|F;size=1_and_m363544/515/CCS|F;size=2_at_176_ITS1_reversed_no_1459	m394451/881/CCS|F;size=1	m363544/515/CCS|F;size=2	176	ITS1	no	476	540	476	0.326
chimera_m101671/612/CCS|F;size=1_and_m272541/1144/CCS|F;size=1_at_64_ITS1_reversed_no_1460	m101671/612/CCS|F;size=1	m272541/1144/CCS|F;size=1	64	ITS1	no	829	612	829	0.105
chimera_m134917/731/CCS|F;size=2_and_m21437/921/CCS|F;size=1_at_326_ITS2_reversed_no_1461	m134917/731/CCS|F;size=2	m21437/921/CCS|F;size=1	326	ITS2	no	531	603	531	0.541
chimera_m123599/1013/CCS|F;size=1_and_m173142/541/CCS|F;size=1_at_230_ITS2_reversed_no_1462	m123599/1013/CCS|F;size=1	m173142/541/CCS|F;size=1	230	ITS2	no	492	405	492	0.568
chimera_m247966/1660/CCS|F;size=2_and_m44493/1012/CCS|F;size=1_at_138_ITS1_reversed_no_1463	m247966/1660/CCS|F;size=2	m44493/1012/CCS|F;size=1	138	ITS1	no	500	572	500	0.241
chimera_m323184/1478/CCS|F;size=1_and_m338957/1122/CCS|F;size=1_at_182_ITS1_reversed_no_1464	m323184/1478/CCS|F;size=1	m338957/1122/CCS|F;size=1	182	ITS1	no	530	564	530	0.323
chimera_m333000/942/CCS|F;size=1_and_m20259/1376/CCS|F;size=1_at_215_5.8S_reversed_no_1465	m333000/942/CCS|F;size=1	m20259/1376/CCS|F;size=1	215	5.8S	no	495	454	495	0.474
chimera_m408577/1224/CCS|F;size=2_and_m238790/1650/CCS|F;size=1_at_179_ITS1_reversed_no_1466	m408577/1224/CCS|F;size=2	m238790/1650/CCS|F;size=1	179	ITS1	no	588	521	588	0.344
chimera_m306368/1078/CCS|F;size=1_and_m227905/813/CCS|F;size=1_at_51_ITS1_reversed_yes_1467	m306368/1078/CCS|F;size=1	m227905/813/CCS|F;size=1	51	ITS1	yes	517	499	517	0.102
chimera_m33180/1413/CCS|F;size=2_and_m100214/622/CCS|F;size=1_at_353_ITS2_reversed_no_1468	m33180/1413/CCS|F;size=2	m100214/622/CCS|F;size=1	353	ITS2	no	445	508	445	0.695
chimera_m111664/1365/CCS|F;size=1_and_m110996/706/CCS|F;size=1_at_308_ITS2_reversed_no_1469	m111664/1365/CCS|F;size=1	m110996/706/CCS|F;size=1	308	ITS2	no	552	539	552	0.571
chimera_m152783/1139/CCS|F;size=1_and_m164954/1628/CCS|F;size=1_at_134_ITS1_reversed_no_1470	m152783/1139/CCS|F;size=1	m164954/1628/CCS|F;size=1	134	ITS1	no	520	432	520	0.31
chimera_m238996/638/CCS|F;size=1_and_m156402/902/CCS|F;size=2_at_176_5.8S_reversed_no_1471	m238996/638/CCS|F;size=1	m156402/902/CCS|F;size=2	176	5.8S	no	537	460	537	0.383
chimera_m133675/1005/CCS|F;size=1_and_m186758/365/CCS|F;size=1_at_187_5.8S_reversed_no_1472	m133675/1005/CCS|F;size=1	m186758/365/CCS|F;size=1	187	5.8S	no	365	486	365	0.385
chimera_m349609/610/CCS|F;size=1_and_m28271/1370/CCS|F;size=1_at_134_ITS1_reversed_no_1473	m349609/610/CCS|F;size=1	m28271/1370/CCS|F;size=1	134	ITS1	no	405	610	405	0.22
chimera_m63937/1046/CCS|F;size=1_and_m324811/809/CCS|F;size=1_at_107_ITS1_reversed_no_1474	m63937/1046/CCS|F;size=1	m324811/809/CCS|F;size=1	107	ITS1	no	598	471	598	0.227
chimera_m7189/729/CCS|F;size=1_and_m150268/1493/CCS|F;size=1_at_167_ITS1_reversed_no_1475	m7189/729/CCS|F;size=1	m150268/1493/CCS|F;size=1	167	ITS1	no	407	511	407	0.327
chimera_m172748/755/CCS|F;size=1_and_m359907/1467/CCS|F;size=1_at_167_5.8S_reversed_no_1476	m172748/755/CCS|F;size=1	m359907/1467/CCS|F;size=1	167	5.8S	no	578	441	578	0.379
chimera_m144484/886/CCS|F;size=1_and_m258745/1495/CCS|F;size=1_at_612_ITS2_reversed_no_1477	m144484/886/CCS|F;size=1	m258745/1495/CCS|F;size=1	612	ITS2	no	612	676	588	0.905
chimera_m99556/986/CCS|F;size=1_and_m145276/1053/CCS|F;size=1_at_380_ITS2_reversed_no_1478	m99556/986/CCS|F;size=1	m145276/1053/CCS|F;size=1	380	ITS2	no	520	582	520	0.653
chimera_m81368/752/CCS|F;size=1_and_m195088/770/CCS|F;size=1_at_19_ITS1_reversed_no_1479	m81368/752/CCS|F;size=1	m195088/770/CCS|F;size=1	19	ITS1	no	496	462	496	0.041
chimera_m120050/1813/CCS|F;size=1_and_m173985/452/CCS|F;size=1_at_118_ITS1_reversed_no_1480	m120050/1813/CCS|F;size=1	m173985/452/CCS|F;size=1	118	ITS1	no	452	552	452	0.214
chimera_m164883/411/CCS|F;size=1_and_m184559/1517/CCS|F;size=1_at_271_ITS2_reversed_no_1481	m164883/411/CCS|F;size=1	m184559/1517/CCS|F;size=1	271	ITS2	no	558	411	558	0.659
chimera_m278609/465/CCS|F;size=1_and_m192344/2022/CCS|F;size=1_at_265_ITS2_reversed_no_1482	m278609/465/CCS|F;size=1	m192344/2022/CCS|F;size=1	265	ITS2	no	759	465	759	0.57
chimera_m219763/897/CCS|F;size=1_and_m58089/1463/CCS|F;size=1_at_251_ITS2_reversed_no_1483	m219763/897/CCS|F;size=1	m58089/1463/CCS|F;size=1	251	ITS2	no	783	494	783	0.508
chimera_m288585/494/CCS|F;size=1_and_m1948/1422/CCS|F;size=1_at_205_5.8S_reversed_no_1484	m288585/494/CCS|F;size=1	m1948/1422/CCS|F;size=1	205	5.8S	no	537	494	537	0.415
chimera_m387272/1149/CCS|F;size=1_and_m307871/1442/CCS|F;size=1_at_136_ITS1_reversed_no_1485	m387272/1149/CCS|F;size=1	m307871/1442/CCS|F;size=1	136	ITS1	no	619	552	619	0.246
chimera_m278494/1281/CCS|F;size=1_and_m6726/991/CCS|F;size=1_at_278_ITS2_reversed_no_1486	m278494/1281/CCS|F;size=1	m6726/991/CCS|F;size=1	278	ITS2	no	602	436	602	0.638
chimera_m91006/594/CCS|F;size=1_and_m179530/658/CCS|F;size=1_at_110_ITS1_reversed_yes_1487	m91006/594/CCS|F;size=1	m179530/658/CCS|F;size=1	110	ITS1	yes	658	464	658	0.237
chimera_m348426/1683/CCS|F;size=1_and_m97512/1409/CCS|F;size=1_at_405_ITS2_reversed_no_1488	m348426/1683/CCS|F;size=1	m97512/1409/CCS|F;size=1	405	ITS2	no	536	613	536	0.661
chimera_m136326/773/CCS|F;size=1_and_m26274/502/CCS|F;size=1_at_429_ITS2_reversed_no_1489	m136326/773/CCS|F;size=1	m26274/502/CCS|F;size=1	429	ITS2	no	502	560	502	0.766
chimera_m77939/1054/CCS|F;size=1_and_m189885/583/CCS|F;size=1_at_290_ITS2_reversed_no_1490	m77939/1054/CCS|F;size=1	m189885/583/CCS|F;size=1	290	ITS2	no	537	560	537	0.518
chimera_m84218/800/CCS|F;size=2_and_m104181/1037/CCS|F;size=1_at_350_ITS2_reversed_yes_1491	m84218/800/CCS|F;size=2	m104181/1037/CCS|F;size=1	350	ITS2	yes	451	558	451	0.627
chimera_m49075/1013/CCS|F;size=1_and_m94600/1036/CCS|F;size=2_at_144_ITS1_reversed_no_1492	m49075/1013/CCS|F;size=1	m94600/1036/CCS|F;size=2	144	ITS1	no	537	492	537	0.293
chimera_m85740/479/CCS|F;size=1_and_m376235/747/CCS|F;size=1_at_158_ITS1_reversed_no_1493	m85740/479/CCS|F;size=1	m376235/747/CCS|F;size=1	158	ITS1	no	515	479	515	0.33
chimera_m395725/1208/CCS|F;size=1_and_m70044/574/CCS|F;size=1_at_70_ITS1_reversed_no_1494	m395725/1208/CCS|F;size=1	m70044/574/CCS|F;size=1	70	ITS1	no	416	590	416	0.119
chimera_m323809/1644/CCS|F;size=1_and_m972/1517/CCS|F;size=1_at_470_ITS2_reversed_no_1495	m323809/1644/CCS|F;size=1	m972/1517/CCS|F;size=1	470	ITS2	no	545	794	545	0.592
chimera_m201059/1469/CCS|F;size=1_and_m82933/886/CCS|F;size=2_at_477_ITS2_reversed_no_1496	m201059/1469/CCS|F;size=1	m82933/886/CCS|F;size=2	477	ITS2	no	477	779	442	0.612
chimera_m54158/1302/CCS|F;size=1_and_m109412/1218/CCS|F;size=1_at_116_ITS1_reversed_no_1497	m54158/1302/CCS|F;size=1	m109412/1218/CCS|F;size=1	116	ITS1	no	535	535	535	0.217
chimera_m297731/324/CCS|F;size=1_and_m247606/1219/CCS|F;size=1_at_118_5.8S_reversed_no_1498	m297731/324/CCS|F;size=1	m247606/1219/CCS|F;size=1	118	5.8S	no	501	324	501	0.364
chimera_m13794/1236/CCS|F;size=1_and_m397548/1159/CCS|F;size=1_at_80_ITS1_reversed_no_1499	m13794/1236/CCS|F;size=1	m397548/1159/CCS|F;size=1	80	ITS1	no	590	569	590	0.141
chimera_m25831/1071/CCS|F;size=1_and_m53313/549/CCS|F;size=1_at_332_ITS2_reversed_no_1500	m25831/1071/CCS|F;size=1	m53313/549/CCS|F;size=1	332	ITS2	no	424	510	424	0.651
chimera_m138591/1422/CCS|F;size=2_and_m206642/1140/CCS|F;size=1_at_171_ITS1_reversed_no_1501	m138591/1422/CCS|F;size=2	m206642/1140/CCS|F;size=1	171	ITS1	no	798	532	798	0.321
chimera_m228323/1404/CCS|F;size=2_and_m65579/1138/CCS|F;size=1_at_309_ITS2_reversed_no_1502	m228323/1404/CCS|F;size=2	m65579/1138/CCS|F;size=1	309	ITS2	no	541	419	541	0.737
chimera_m180701/667/CCS|F;size=1_and_m331141/1226/CCS|F;size=1_at_67_ITS1_reversed_no_1503	m180701/667/CCS|F;size=1	m331141/1226/CCS|F;size=1	67	ITS1	no	688	482	688	0.139
chimera_m274982/700/CCS|F;size=1_and_m198387/692/CCS|F;size=1_at_477_ITS2_reversed_no_1504	m274982/700/CCS|F;size=1	m198387/692/CCS|F;size=1	477	ITS2	no	557	594	557	0.803
chimera_m78028/1685/CCS|F;size=1_and_m376061/640/CCS|F;size=1_at_360_ITS2_reversed_no_1505	m78028/1685/CCS|F;size=1	m376061/640/CCS|F;size=1	360	ITS2	no	561	665	561	0.541
chimera_m27365/775/CCS|F;size=2_and_m160368/1507/CCS|F;size=1_at_125_ITS1_reversed_no_1506	m27365/775/CCS|F;size=2	m160368/1507/CCS|F;size=1	125	ITS1	no	394	537	394	0.233
chimera_m153728/1396/CCS|F;size=1_and_m139163/869/CCS|F;size=1_at_296_ITS2_reversed_no_1507	m153728/1396/CCS|F;size=1	m139163/869/CCS|F;size=1	296	ITS2	no	456	507	456	0.584
chimera_m28322/1091/CCS|F;size=2_and_m409694/973/CCS|F;size=1_at_139_ITS1_reversed_no_1508	m28322/1091/CCS|F;size=2	m409694/973/CCS|F;size=1	139	ITS1	no	570	439	570	0.317
chimera_m89189/698/CCS|F;size=1_and_m68015/882/CCS|F;size=1_at_85_ITS1_reversed_no_1509	m89189/698/CCS|F;size=1	m68015/882/CCS|F;size=1	85	ITS1	no	518	570	518	0.149
chimera_m377881/622/CCS|F;size=1_and_m376061/640/CCS|F;size=1_at_396_ITS2_reversed_no_1510	m377881/622/CCS|F;size=1	m376061/640/CCS|F;size=1	396	ITS2	no	561	622	561	0.637
chimera_m239212/1257/CCS|F;size=1_and_m40614/1280/CCS|F;size=1_at_268_ITS2_reversed_no_1511	m239212/1257/CCS|F;size=1	m40614/1280/CCS|F;size=1	268	ITS2	no	513	511	513	0.524
chimera_m245974/1096/CCS|F;size=2_and_m1336/1832/CCS|F;size=78_at_239_ITS1_reversed_no_1512	m245974/1096/CCS|F;size=2	m1336/1832/CCS|F;size=78	239	ITS1	no	735	981	735	0.244
chimera_m246548/918/CCS|F;size=2_and_m9346/982/CCS|F;size=1_at_381_ITS2_reversed_no_1513	m246548/918/CCS|F;size=2	m9346/982/CCS|F;size=1	381	ITS2	no	432	550	432	0.693
chimera_m249764/797/CCS|F;size=1_and_m259257/1154/CCS|F;size=1_at_463_ITS2_reversed_no_1514	m249764/797/CCS|F;size=1	m259257/1154/CCS|F;size=1	463	ITS2	no	621	797	621	0.581
chimera_m284241/959/CCS|F;size=1_and_m214304/793/CCS|F;size=1_at_89_ITS1_reversed_no_1515	m284241/959/CCS|F;size=1	m214304/793/CCS|F;size=1	89	ITS1	no	485	617	485	0.144
chimera_m259162/527/CCS|F;size=1_and_m176988/1309/CCS|F;size=2_at_154_ITS1_reversed_no_1516	m259162/527/CCS|F;size=1	m176988/1309/CCS|F;size=2	154	ITS1	no	453	527	453	0.292
chimera_m267276/802/CCS|F;size=1_and_m26897/788/CCS|F;size=1_at_387_ITS2_reversed_no_1517	m267276/802/CCS|F;size=1	m26897/788/CCS|F;size=1	387	ITS2	no	478	502	478	0.771
chimera_m235391/951/CCS|F;size=1_and_m39656/1773/CCS|F;size=1_at_136_ITS1_reversed_no_1518	m235391/951/CCS|F;size=1	m39656/1773/CCS|F;size=1	136	ITS1	no	418	466	418	0.292
chimera_m186995/707/CCS|F;size=1_and_m394/657/CCS|F;size=2_at_330_ITS2_reversed_no_1519	m186995/707/CCS|F;size=1	m394/657/CCS|F;size=2	330	ITS2	no	429	550	429	0.6
chimera_m345351/828/CCS|F;size=1_and_m75043/1233/CCS|F;size=1_at_130_ITS1_reversed_no_1520	m345351/828/CCS|F;size=1	m75043/1233/CCS|F;size=1	130	ITS1	no	495	460	495	0.283
chimera_m197107/899/CCS|F;size=1_and_m334588/892/CCS|F;size=1_at_25_ITS1_reversed_no_1521	m197107/899/CCS|F;size=1	m334588/892/CCS|F;size=1	25	ITS1	no	691	552	691	0.045
chimera_m164658/1167/CCS|F;size=1_and_m298714/902/CCS|F;size=1_at_321_ITS2_reversed_yes_1522	m164658/1167/CCS|F;size=1	m298714/902/CCS|F;size=1	321	ITS2	yes	613	637	613	0.504
chimera_m159109/927/CCS|F;size=1_and_m283096/571/CCS|F;size=1_at_108_ITS1_reversed_no_1523	m159109/927/CCS|F;size=1	m283096/571/CCS|F;size=1	108	ITS1	no	419	439	419	0.246
chimera_m383110/974/CCS|F;size=1_and_m366583/1460/CCS|F;size=1_at_64_ITS1_reversed_no_1524	m383110/974/CCS|F;size=1	m366583/1460/CCS|F;size=1	64	ITS1	no	607	483	607	0.133
chimera_m317281/1609/CCS|F;size=1_and_m203787/609/CCS|F;size=1_at_139_ITS1_reversed_no_1525	m317281/1609/CCS|F;size=1	m203787/609/CCS|F;size=1	139	ITS1	no	471	558	471	0.249
chimera_m185972/598/CCS|F;size=1_and_m241519/789/CCS|F;size=1_at_183_ITS1_reversed_no_1526	m185972/598/CCS|F;size=1	m241519/789/CCS|F;size=1	183	ITS1	no	436	563	436	0.325
chimera_m297069/931/CCS|F;size=1_and_m44519/873/CCS|F;size=1_at_146_ITS1_reversed_no_1527	m297069/931/CCS|F;size=1	m44519/873/CCS|F;size=1	146	ITS1	no	470	702	470	0.208
chimera_m56556/1227/CCS|F;size=1_and_m177523/944/CCS|F;size=1_at_385_ITS2_reversed_no_1528	m56556/1227/CCS|F;size=1	m177523/944/CCS|F;size=1	385	ITS2	no	560	541	560	0.712
chimera_m196198/466/CCS|F;size=1_and_m83779/1234/CCS|F;size=1_at_162_ITS1_reversed_no_1529	m196198/466/CCS|F;size=1	m83779/1234/CCS|F;size=1	162	ITS1	no	619	466	619	0.348
chimera_m372218/1239/CCS|F;size=1_and_m86951/845/CCS|F;size=1_at_342_ITS2_reversed_no_1530	m372218/1239/CCS|F;size=1	m86951/845/CCS|F;size=1	342	ITS2	no	503	592	503	0.578
chimera_m120575/985/CCS|F;size=1_and_m214261/382/CCS|F;size=1_at_117_ITS1_reversed_no_1531	m120575/985/CCS|F;size=1	m214261/382/CCS|F;size=1	117	ITS1	no	382	437	382	0.268
chimera_m142975/630/CCS|F;size=1_and_m222012/1032/CCS|F;size=1_at_106_ITS1_reversed_no_1532	m142975/630/CCS|F;size=1	m222012/1032/CCS|F;size=1	106	ITS1	no	574	534	574	0.199
chimera_m95827/1757/CCS|F;size=1_and_m146339/976/CCS|F;size=1_at_202_ITS2_reversed_no_1533	m95827/1757/CCS|F;size=1	m146339/976/CCS|F;size=1	202	ITS2	no	522	403	522	0.501
chimera_m58735/1192/CCS|F;size=1_and_m141843/1011/CCS|F;size=2_at_86_ITS1_reversed_no_1534	m58735/1192/CCS|F;size=1	m141843/1011/CCS|F;size=2	86	ITS1	no	576	493	576	0.174
chimera_m160948/1205/CCS|F;size=1_and_m234611/827/CCS|F;size=1_at_388_ITS2_reversed_no_1535	m160948/1205/CCS|F;size=1	m234611/827/CCS|F;size=1	388	ITS2	no	604	580	604	0.669
chimera_m232808/1749/CCS|F;size=1_and_m57809/996/CCS|F;size=1_at_64_ITS1_reversed_no_1536	m232808/1749/CCS|F;size=1	m57809/996/CCS|F;size=1	64	ITS1	no	491	673	491	0.095
chimera_m112234/1228/CCS|F;size=1_and_m203056/1038/CCS|F;size=1_at_406_ITS2_reversed_no_1537	m112234/1228/CCS|F;size=1	m203056/1038/CCS|F;size=1	406	ITS2	no	647	545	647	0.745
chimera_m155835/1223/CCS|F;size=1_and_m190202/648/CCS|F;size=1_at_264_ITS2_reversed_no_1538	m155835/1223/CCS|F;size=1	m190202/648/CCS|F;size=1	264	ITS2	no	648	437	648	0.604
chimera_m165792/1933/CCS|F;size=2_and_m134131/1360/CCS|F;size=1_at_151_ITS1_reversed_no_1539	m165792/1933/CCS|F;size=2	m134131/1360/CCS|F;size=1	151	ITS1	no	534	528	534	0.286
chimera_m127710/567/CCS|F;size=1_and_m234099/1393/CCS|F;size=1_at_185_ITS2_reversed_no_1540	m127710/567/CCS|F;size=1	m234099/1393/CCS|F;size=1	185	ITS2	no	431	352	431	0.526
chimera_m154271/786/CCS|F;size=1_and_m281062/543/CCS|F;size=1_at_170_ITS1_reversed_no_1541	m154271/786/CCS|F;size=1	m281062/543/CCS|F;size=1	170	ITS1	no	474	531	474	0.32
chimera_m390974/503/CCS|F;size=1_and_m238951/1335/CCS|F;size=1_at_151_ITS1_reversed_no_1542	m390974/503/CCS|F;size=1	m238951/1335/CCS|F;size=1	151	ITS1	no	533	503	533	0.3
chimera_m207316/1465/CCS|F;size=1_and_m62371/725/CCS|F;size=2_at_220_5.8S_reversed_no_1543	m207316/1465/CCS|F;size=1	m62371/725/CCS|F;size=2	220	5.8S	no	510	483	510	0.455
chimera_m193052/1536/CCS|F;size=1_and_m71989/991/CCS|F;size=1_at_442_ITS2_reversed_no_1544	m193052/1536/CCS|F;size=1	m71989/991/CCS|F;size=1	442	ITS2	no	528	751	528	0.589
chimera_m188740/870/CCS|F;size=1_and_m319057/1050/CCS|F;size=2_at_424_ITS2_reversed_no_1545	m188740/870/CCS|F;size=1	m319057/1050/CCS|F;size=2	424	ITS2	no	436	609	436	0.696
chimera_m284973/1309/CCS|F;size=1_and_m162881/725/CCS|F;size=1_at_269_ITS2_reversed_no_1546	m284973/1309/CCS|F;size=1	m162881/725/CCS|F;size=1	269	ITS2	no	463	493	463	0.546
chimera_m87925/581/CCS|F;size=1_and_m233139/1398/CCS|F;size=1_at_189_5.8S_reversed_no_1547	m87925/581/CCS|F;size=1	m233139/1398/CCS|F;size=1	189	5.8S	no	526	492	526	0.384
chimera_m201361/1943/CCS|F;size=1_and_m1/1273/CCS|F;size=1_at_132_ITS1_reversed_no_1548	m201361/1943/CCS|F;size=1	m1/1273/CCS|F;size=1	132	ITS1	no	520	590	520	0.224
chimera_m346907/757/CCS|F;size=1_and_m67006/548/CCS|F;size=1_at_115_ITS1_reversed_no_1549	m346907/757/CCS|F;size=1	m67006/548/CCS|F;size=1	115	ITS1	no	454	406	454	0.283
chimera_m19686/760/CCS|F;size=1_and_m307748/550/CCS|F;size=1_at_119_ITS1_reversed_yes_1550	m19686/760/CCS|F;size=1	m307748/550/CCS|F;size=1	119	ITS1	yes	514	521	514	0.228
chimera_m160717/620/CCS|F;size=1_and_m182075/716/CCS|F;size=1_at_265_ITS2_reversed_no_1551	m160717/620/CCS|F;size=1	m182075/716/CCS|F;size=1	265	ITS2	no	508	543	508	0.488
chimera_m101096/1336/CCS|F;size=1_and_m365172/1480/CCS|F;size=1_at_147_ITS1_reversed_no_1552	m101096/1336/CCS|F;size=1	m365172/1480/CCS|F;size=1	147	ITS1	no	525	519	525	0.283
chimera_m14507/1035/CCS|F;size=1_and_m340280/640/CCS|F;size=1_at_223_ITS1_reversed_no_1553	m14507/1035/CCS|F;size=1	m340280/640/CCS|F;size=1	223	ITS1	no	507	750	507	0.297
chimera_m68850/1009/CCS|F;size=1_and_m266336/552/CCS|F;size=1_at_353_ITS2_reversed_no_1554	m68850/1009/CCS|F;size=1	m266336/552/CCS|F;size=1	353	ITS2	no	552	561	552	0.629
chimera_m98200/703/CCS|F;size=1_and_m136492/1747/CCS|F;size=1_at_414_ITS2_reversed_no_1555	m98200/703/CCS|F;size=1	m136492/1747/CCS|F;size=1	414	ITS2	no	555	518	555	0.799
chimera_m189419/961/CCS|F;size=1_and_m97753/432/CCS|F;size=1_at_101_ITS1_reversed_no_1556	m189419/961/CCS|F;size=1	m97753/432/CCS|F;size=1	101	ITS1	no	432	619	432	0.163
chimera_m128783/542/CCS|F;size=1_and_m121451/987/CCS|F;size=1_at_45_ITS1_reversed_no_1557	m128783/542/CCS|F;size=1	m121451/987/CCS|F;size=1	45	ITS1	no	566	438	566	0.103
chimera_m221279/950/CCS|F;size=1_and_m219569/372/CCS|F;size=1_at_118_ITS1_reversed_yes_1558	m221279/950/CCS|F;size=1	m219569/372/CCS|F;size=1	118	ITS1	yes	372	464	372	0.254
chimera_m166941/746/CCS|F;size=1_and_m235705/805/CCS|F;size=1_at_159_ITS1_reversed_no_1559	m166941/746/CCS|F;size=1	m235705/805/CCS|F;size=1	159	ITS1	no	472	534	472	0.298
chimera_m250557/649/CCS|F;size=2_and_m154591/981/CCS|F;size=1_at_344_ITS2_reversed_no_1560	m250557/649/CCS|F;size=2	m154591/981/CCS|F;size=1	344	ITS2	no	546	561	546	0.613
chimera_m1341/1793/CCS|F;size=97_and_m163578/1780/CCS|F;size=1_at_351_ITS2_reversed_no_1561	m1341/1793/CCS|F;size=97	m163578/1780/CCS|F;size=1	351	ITS2	no	470	571	470	0.615
chimera_m448072/1014/CCS|F;size=1_and_m390326/658/CCS|F;size=4_at_438_ITS2_reversed_no_1562	m448072/1014/CCS|F;size=1	m390326/658/CCS|F;size=4	438	ITS2	no	502	658	502	0.666
chimera_m191075/612/CCS|F;size=1_and_m75848/724/CCS|F;size=1_at_352_ITS2_reversed_no_1563	m191075/612/CCS|F;size=1	m75848/724/CCS|F;size=1	352	ITS2	no	420	555	420	0.634
chimera_m78411/697/CCS|F;size=1_and_m101580/811/CCS|F;size=1_at_177_ITS1_reversed_no_1564	m78411/697/CCS|F;size=1	m101580/811/CCS|F;size=1	177	ITS1	no	411	697	411	0.254
chimera_m30815/638/CCS|F;size=1_and_m226066/925/CCS|F;size=1_at_277_ITS2_reversed_no_1565	m30815/638/CCS|F;size=1	m226066/925/CCS|F;size=1	277	ITS2	no	648	525	648	0.528
chimera_m109093/845/CCS|F;size=1_and_m14385/1008/CCS|F;size=1_at_120_ITS1_reversed_no_1566	m109093/845/CCS|F;size=1	m14385/1008/CCS|F;size=1	120	ITS1	no	630	434	630	0.276
chimera_m258206/1662/CCS|F;size=1_and_m255913/761/CCS|F;size=1_at_90_ITS1_reversed_no_1567	m258206/1662/CCS|F;size=1	m255913/761/CCS|F;size=1	90	ITS1	no	462	682	462	0.132
chimera_m403022/715/CCS|F;size=1_and_m71428/582/CCS|F;size=1_at_422_ITS2_reversed_no_1568	m403022/715/CCS|F;size=1	m71428/582/CCS|F;size=1	422	ITS2	no	582	715	582	0.59
chimera_m15634/799/CCS|F;size=1_and_m98837/586/CCS|F;size=1_at_111_ITS1_reversed_no_1569	m15634/799/CCS|F;size=1	m98837/586/CCS|F;size=1	111	ITS1	no	463	443	463	0.251
chimera_m47329/1164/CCS|F;size=1_and_m254573/1521/CCS|F;size=1_at_126_ITS1_reversed_no_1570	m47329/1164/CCS|F;size=1	m254573/1521/CCS|F;size=1	126	ITS1	no	596	580	596	0.217
chimera_m89539/495/CCS|F;size=1_and_m181429/660/CCS|F;size=2_at_28_ITS1_reversed_no_1571	m89539/495/CCS|F;size=1	m181429/660/CCS|F;size=2	28	ITS1	no	509	425	509	0.066
chimera_m408714/312/CCS|F;size=1_and_m342245/752/CCS|F;size=1_at_122_5.8S_reversed_no_1572	m408714/312/CCS|F;size=1	m342245/752/CCS|F;size=1	122	5.8S	no	400	312	400	0.391
chimera_m124655/637/CCS|F;size=1_and_m16756/1118/CCS|F;size=1_at_114_ITS1_reversed_no_1573	m124655/637/CCS|F;size=1	m16756/1118/CCS|F;size=1	114	ITS1	no	496	500	496	0.228
chimera_m226998/531/CCS|F;size=1_and_m175/1556/CCS|F;size=99_at_308_ITS2_reversed_no_1574	m226998/531/CCS|F;size=1	m175/1556/CCS|F;size=99	308	ITS2	no	549	412	549	0.748
chimera_m165350/865/CCS|F;size=1_and_m155156/662/CCS|F;size=1_at_405_ITS2_reversed_no_1575	m165350/865/CCS|F;size=1	m155156/662/CCS|F;size=1	405	ITS2	no	446	534	446	0.758
chimera_m639/1130/CCS|F;size=33_and_m274820/1299/CCS|F;size=1_at_135_ITS1_reversed_no_1576	m639/1130/CCS|F;size=33	m274820/1299/CCS|F;size=1	135	ITS1	no	637	500	637	0.27
chimera_m44837/1279/CCS|F;size=1_and_m390326/658/CCS|F;size=4_at_95_ITS1_reversed_no_1577	m44837/1279/CCS|F;size=1	m390326/658/CCS|F;size=4	95	ITS1	no	502	730	502	0.13
chimera_m117734/1642/CCS|F;size=1_and_m153501/671/CCS|F;size=1_at_393_ITS2_reversed_no_1578	m117734/1642/CCS|F;size=1	m153501/671/CCS|F;size=1	393	ITS2	no	513	568	513	0.692
chimera_m149721/828/CCS|F;size=1_and_m345712/530/CCS|F;size=1_at_453_ITS2_reversed_no_1579	m149721/828/CCS|F;size=1	m345712/530/CCS|F;size=1	453	ITS2	no	530	709	530	0.639
chimera_m281643/654/CCS|F;size=1_and_m214620/580/CCS|F;size=1_at_136_ITS1_reversed_no_1580	m281643/654/CCS|F;size=1	m214620/580/CCS|F;size=1	136	ITS1	no	443	593	443	0.229
chimera_m169448/613/CCS|F;size=1_and_m167151/444/CCS|F;size=1_at_207_ITS2_reversed_no_1581	m169448/613/CCS|F;size=1	m167151/444/CCS|F;size=1	207	ITS2	no	444	431	444	0.48
chimera_m291418/769/CCS|F;size=1_and_m375032/1489/CCS|F;size=1_at_76_ITS1_reversed_no_1582	m291418/769/CCS|F;size=1	m375032/1489/CCS|F;size=1	76	ITS1	no	665	470	665	0.162
chimera_m28909/512/CCS|F;size=1_and_m70704/1457/CCS|F;size=1_at_289_ITS2_reversed_no_1583	m28909/512/CCS|F;size=1	m70704/1457/CCS|F;size=1	289	ITS2	no	535	512	535	0.564
chimera_m64589/1033/CCS|F;size=1_and_m9484/1953/CCS|F;size=1_at_295_ITS2_reversed_yes_1584	m64589/1033/CCS|F;size=1	m9484/1953/CCS|F;size=1	295	ITS2	yes	575	431	575	0.684
chimera_m129391/501/CCS|F;size=1_and_m112383/820/CCS|F;size=1_at_259_ITS2_reversed_no_1585	m129391/501/CCS|F;size=1	m112383/820/CCS|F;size=1	259	ITS2	no	738	501	738	0.517
chimera_m255674/681/CCS|F;size=1_and_m54934/1459/CCS|F;size=1_at_258_ITS2_reversed_no_1586	m255674/681/CCS|F;size=1	m54934/1459/CCS|F;size=1	258	ITS2	no	512	447	512	0.577
chimera_m402954/673/CCS|F;size=1_and_m129915/616/CCS|F;size=1_at_86_ITS1_reversed_no_1587	m402954/673/CCS|F;size=1	m129915/616/CCS|F;size=1	86	ITS1	no	492	405	492	0.212
chimera_m397705/958/CCS|F;size=1_and_m154183/565/CCS|F;size=1_at_382_ITS2_reversed_no_1588	m397705/958/CCS|F;size=1	m154183/565/CCS|F;size=1	382	ITS2	no	457	665	457	0.574
chimera_m191386/1124/CCS|F;size=1_and_m135412/1201/CCS|F;size=3_at_125_ITS1_reversed_no_1589	m191386/1124/CCS|F;size=1	m135412/1201/CCS|F;size=3	125	ITS1	no	463	508	463	0.246
chimera_m179072/553/CCS|F;size=1_and_m207583/784/CCS|F;size=2_at_138_ITS1_reversed_no_1590	m179072/553/CCS|F;size=1	m207583/784/CCS|F;size=2	138	ITS1	no	532	450	532	0.307
chimera_m102461/565/CCS|F;size=1_and_m67533/984/CCS|F;size=1_at_362_ITS2_reversed_no_1591	m102461/565/CCS|F;size=1	m67533/984/CCS|F;size=1	362	ITS2	no	745	488	745	0.742
chimera_m46867/521/CCS|F;size=1_and_m54842/912/CCS|F;size=1_at_309_ITS2_reversed_no_1592	m46867/521/CCS|F;size=1	m54842/912/CCS|F;size=1	309	ITS2	no	576	521	576	0.593
chimera_m184159/1292/CCS|F;size=1_and_m215159/1385/CCS|F;size=1_at_247_ITS2_reversed_no_1593	m184159/1292/CCS|F;size=1	m215159/1385/CCS|F;size=1	247	ITS2	no	561	421	561	0.587
chimera_m339589/607/CCS|F;size=1_and_m185070/930/CCS|F;size=1_at_121_ITS1_reversed_no_1594	m339589/607/CCS|F;size=1	m185070/930/CCS|F;size=1	121	ITS1	no	395	607	395	0.199
chimera_m214319/1146/CCS|F;size=1_and_m32954/982/CCS|F;size=1_at_132_ITS1_reversed_no_1595	m214319/1146/CCS|F;size=1	m32954/982/CCS|F;size=1	132	ITS1	no	502	515	502	0.256
chimera_m96071/372/CCS|F;size=1_and_m98489/713/CCS|F;size=1_at_244_ITS2_reversed_yes_1596	m96071/372/CCS|F;size=1	m98489/713/CCS|F;size=1	244	ITS2	yes	491	372	491	0.656
chimera_m64093/643/CCS|F;size=1_and_m330256/1526/CCS|F;size=1_at_130_ITS1_reversed_no_1597	m64093/643/CCS|F;size=1	m330256/1526/CCS|F;size=1	130	ITS1	no	462	499	462	0.261
chimera_m288481/759/CCS|F;size=1_and_m91825/1047/CCS|F;size=1_at_322_ITS2_reversed_no_1598	m288481/759/CCS|F;size=1	m91825/1047/CCS|F;size=1	322	ITS2	no	574	474	574	0.679
chimera_m97658/1026/CCS|F;size=1_and_m238516/1180/CCS|F;size=1_at_452_ITS2_reversed_no_1599	m97658/1026/CCS|F;size=1	m238516/1180/CCS|F;size=1	452	ITS2	no	620	577	620	0.783
chimera_m191029/1418/CCS|F;size=1_and_m113475/342/CCS|F;size=1_at_74_ITS1_reversed_no_1600	m191029/1418/CCS|F;size=1	m113475/342/CCS|F;size=1	74	ITS1	no	342	472	342	0.157
chimera_m83927/574/CCS|F;size=1_and_m78444/1238/CCS|F;size=1_at_47_ITS1_reversed_no_1601	m83927/574/CCS|F;size=1	m78444/1238/CCS|F;size=1	47	ITS1	no	531	430	531	0.109
chimera_m145369/878/CCS|F;size=1_and_m161364/764/CCS|F;size=1_at_212_ITS1_reversed_no_1602	m145369/878/CCS|F;size=1	m161364/764/CCS|F;size=1	212	ITS1	no	614	665	614	0.319
chimera_m28475/1450/CCS|F;size=1_and_m88708/1084/CCS|F;size=1_at_33_ITS1_reversed_no_1603	m28475/1450/CCS|F;size=1	m88708/1084/CCS|F;size=1	33	ITS1	no	441	488	441	0.068
chimera_m245549/1055/CCS|F;size=1_and_m334821/893/CCS|F;size=1_at_315_ITS2_reversed_yes_1604	m245549/1055/CCS|F;size=1	m334821/893/CCS|F;size=1	315	ITS2	yes	711	528	711	0.597
chimera_m216670/1206/CCS|F;size=1_and_m5228/876/CCS|F;size=1_at_312_ITS2_reversed_no_1605	m216670/1206/CCS|F;size=1	m5228/876/CCS|F;size=1	312	ITS2	no	522	547	522	0.57
chimera_m53505/855/CCS|F;size=1_and_m268611/619/CCS|F;size=1_at_156_ITS1_reversed_no_1606	m53505/855/CCS|F;size=1	m268611/619/CCS|F;size=1	156	ITS1	no	443	624	443	0.25
chimera_m59373/1074/CCS|F;size=1_and_m65027/1429/CCS|F;size=1_at_334_ITS2_reversed_no_1607	m59373/1074/CCS|F;size=1	m65027/1429/CCS|F;size=1	334	ITS2	no	501	514	501	0.65
chimera_m169508/598/CCS|F;size=1_and_m118124/936/CCS|F;size=1_at_390_ITS2_reversed_no_1608	m169508/598/CCS|F;size=1	m118124/936/CCS|F;size=1	390	ITS2	no	662	530	662	0.736
chimera_m469052/1468/CCS|F;size=1_and_m297242/1417/CCS|F;size=1_at_401_ITS2_reversed_no_1609	m469052/1468/CCS|F;size=1	m297242/1417/CCS|F;size=1	401	ITS2	no	645	586	645	0.684
chimera_m26865/928/CCS|F;size=1_and_m162950/762/CCS|F;size=1_at_122_ITS1_reversed_no_1610	m26865/928/CCS|F;size=1	m162950/762/CCS|F;size=1	122	ITS1	no	482	789	482	0.155
chimera_m156649/692/CCS|F;size=1_and_m364036/1313/CCS|F;size=1_at_136_ITS1_reversed_no_1611	m156649/692/CCS|F;size=1	m364036/1313/CCS|F;size=1	136	ITS1	no	753	528	753	0.258
chimera_m61721/988/CCS|F;size=1_and_m84992/1402/CCS|F;size=1_at_131_ITS1_reversed_no_1612	m61721/988/CCS|F;size=1	m84992/1402/CCS|F;size=1	131	ITS1	no	505	426	505	0.308
chimera_m94856/810/CCS|F;size=1_and_m67916/995/CCS|F;size=1_at_63_ITS1_reversed_no_1613	m94856/810/CCS|F;size=1	m67916/995/CCS|F;size=1	63	ITS1	no	533	445	533	0.142
chimera_m16188/1146/CCS|F;size=1_and_m32621/1638/CCS|F;size=1_at_103_ITS1_reversed_no_1614	m16188/1146/CCS|F;size=1	m32621/1638/CCS|F;size=1	103	ITS1	no	597	537	597	0.192
chimera_m223478/1414/CCS|F;size=1_and_m225225/1393/CCS|F;size=1_at_160_ITS1_reversed_no_1615	m223478/1414/CCS|F;size=1	m225225/1393/CCS|F;size=1	160	ITS1	no	545	554	545	0.289
chimera_m120261/755/CCS|F;size=1_and_m268514/1042/CCS|F;size=1_at_246_ITS2_reversed_no_1616	m120261/755/CCS|F;size=1	m268514/1042/CCS|F;size=1	246	ITS2	no	444	411	444	0.599
chimera_m99074/1368/CCS|F;size=1_and_m309323/434/CCS|F;size=1_at_170_ITS1_reversed_no_1617	m99074/1368/CCS|F;size=1	m309323/434/CCS|F;size=1	170	ITS1	no	434	598	434	0.284
chimera_m378951/881/CCS|F;size=1_and_m82332/776/CCS|F;size=3_at_123_ITS1_reversed_no_1618	m378951/881/CCS|F;size=1	m82332/776/CCS|F;size=3	123	ITS1	no	400	432	400	0.285
chimera_m139733/1507/CCS|F;size=1_and_m73666/417/CCS|F;size=1_at_113_ITS1_reversed_no_1619	m139733/1507/CCS|F;size=1	m73666/417/CCS|F;size=1	113	ITS1	no	417	437	417	0.259
chimera_m98301/869/CCS|F;size=1_and_m38638/960/CCS|F;size=1_at_260_ITS2_reversed_yes_1620	m98301/869/CCS|F;size=1	m38638/960/CCS|F;size=1	260	ITS2	yes	508	506	508	0.514
chimera_m207432/942/CCS|F;size=1_and_m3510/440/CCS|F;size=1_at_226_ITS2_reversed_yes_1621	m207432/942/CCS|F;size=1	m3510/440/CCS|F;size=1	226	ITS2	yes	440	433	440	0.522
chimera_m187636/791/CCS|F;size=1_and_m183568/414/CCS|F;size=1_at_353_ITS2_reversed_no_1622	m187636/791/CCS|F;size=1	m183568/414/CCS|F;size=1	353	ITS2	no	414	558	414	0.633
chimera_m81207/628/CCS|F;size=1_and_m76510/679/CCS|F;size=1_at_174_ITS1_reversed_no_1623	m81207/628/CCS|F;size=1	m76510/679/CCS|F;size=1	174	ITS1	no	542	628	542	0.277
chimera_m156337/880/CCS|F;size=1_and_m48971/662/CCS|F;size=1_at_427_ITS2_reversed_yes_1624	m156337/880/CCS|F;size=1	m48971/662/CCS|F;size=1	427	ITS2	yes	635	623	635	0.685
chimera_m92000/1151/CCS|F;size=1_and_m149048/822/CCS|F;size=2_at_478_ITS2_reversed_no_1625	m92000/1151/CCS|F;size=1	m149048/822/CCS|F;size=2	478	ITS2	no	478	633	445	0.755
chimera_m158149/1408/CCS|F;size=1_and_m84416/655/CCS|F;size=1_at_130_ITS1_reversed_no_1626	m158149/1408/CCS|F;size=1	m84416/655/CCS|F;size=1	130	ITS1	no	506	597	506	0.218
chimera_m237291/665/CCS|F;size=1_and_m173553/834/CCS|F;size=1_at_69_ITS1_reversed_no_1627	m237291/665/CCS|F;size=1	m173553/834/CCS|F;size=1	69	ITS1	no	509	497	509	0.139
chimera_m83120/626/CCS|F;size=2_and_m63301/591/CCS|F;size=2_at_93_ITS1_reversed_no_1628	m83120/626/CCS|F;size=2	m63301/591/CCS|F;size=2	93	ITS1	no	507	410	507	0.227
chimera_m173655/945/CCS|F;size=1_and_m300191/1033/CCS|F;size=1_at_372_ITS2_reversed_no_1629	m173655/945/CCS|F;size=1	m300191/1033/CCS|F;size=1	372	ITS2	no	463	533	463	0.698
chimera_m395561/1227/CCS|F;size=1_and_m17530/714/CCS|F;size=1_at_81_ITS1_reversed_yes_1630	m395561/1227/CCS|F;size=1	m17530/714/CCS|F;size=1	81	ITS1	yes	479	523	479	0.155
chimera_m61575/645/CCS|F;size=1_and_m103453/333/CCS|F;size=1_at_101_ITS1_reversed_yes_1631	m61575/645/CCS|F;size=1	m103453/333/CCS|F;size=1	101	ITS1	yes	333	513	333	0.197
chimera_m88280/1016/CCS|F;size=1_and_m146639/1126/CCS|F;size=1_at_155_ITS1_reversed_no_1632	m88280/1016/CCS|F;size=1	m146639/1126/CCS|F;size=1	155	ITS1	no	570	541	570	0.287
chimera_m438111/1568/CCS|F;size=1_and_m144100/1047/CCS|F;size=1_at_340_ITS2_reversed_no_1633	m438111/1568/CCS|F;size=1	m144100/1047/CCS|F;size=1	340	ITS2	no	546	671	546	0.507
chimera_m26373/1808/CCS|F;size=1_and_m34308/1426/CCS|F;size=1_at_568_ITS2_reversed_no_1634	m26373/1808/CCS|F;size=1	m34308/1426/CCS|F;size=1	568	ITS2	no	568	690	482	0.823
chimera_m364326/942/CCS|F;size=1_and_m72956/979/CCS|F;size=1_at_163_ITS1_reversed_no_1635	m364326/942/CCS|F;size=1	m72956/979/CCS|F;size=1	163	ITS1	no	403	638	403	0.255
chimera_m117137/1221/CCS|F;size=1_and_m415056/600/CCS|F;size=1_at_246_ITS2_reversed_no_1636	m117137/1221/CCS|F;size=1	m415056/600/CCS|F;size=1	246	ITS2	no	456	424	456	0.58
chimera_m127808/618/CCS|F;size=1_and_m222432/938/CCS|F;size=1_at_152_5.8S_reversed_no_1637	m127808/618/CCS|F;size=1	m222432/938/CCS|F;size=1	152	5.8S	no	547	421	547	0.361
chimera_m88088/961/CCS|F;size=1_and_m141570/1387/CCS|F;size=2_at_381_ITS2_reversed_no_1638	m88088/961/CCS|F;size=1	m141570/1387/CCS|F;size=2	381	ITS2	no	605	531	605	0.718
chimera_m118539/716/CCS|F;size=1_and_m410706/1627/CCS|F;size=1_at_352_ITS2_reversed_no_1639	m118539/716/CCS|F;size=1	m410706/1627/CCS|F;size=1	352	ITS2	no	447	574	447	0.613
chimera_m205021/713/CCS|F;size=2_and_m342751/1152/CCS|F;size=1_at_233_5.8S_reversed_no_1640	m205021/713/CCS|F;size=2	m342751/1152/CCS|F;size=1	233	5.8S	no	520	491	520	0.475
chimera_m306211/1914/CCS|F;size=1_and_m192654/779/CCS|F;size=1_at_161_ITS1_reversed_no_1641	m306211/1914/CCS|F;size=1	m192654/779/CCS|F;size=1	161	ITS1	no	459	603	459	0.267
chimera_m144660/1147/CCS|F;size=1_and_m171511/1514/CCS|F;size=1_at_99_ITS1_reversed_no_1642	m144660/1147/CCS|F;size=1	m171511/1514/CCS|F;size=1	99	ITS1	no	546	556	546	0.178
chimera_m104913/713/CCS|F;size=1_and_m158/776/CCS|F;size=181_at_348_ITS2_reversed_no_1643	m104913/713/CCS|F;size=1	m158/776/CCS|F;size=181	348	ITS2	no	448	574	448	0.606
chimera_m212158/1049/CCS|F;size=1_and_m53128/1124/CCS|F;size=1_at_173_ITS1_reversed_no_1644	m212158/1049/CCS|F;size=1	m53128/1124/CCS|F;size=1	173	ITS1	no	632	503	632	0.344
chimera_m83843/1201/CCS|F;size=1_and_m78093/609/CCS|F;size=1_at_407_ITS2_reversed_no_1645	m83843/1201/CCS|F;size=1	m78093/609/CCS|F;size=1	407	ITS2	no	528	587	528	0.693
chimera_m168493/691/CCS|F;size=1_and_m11755/477/CCS|F;size=1_at_145_ITS1_reversed_no_1646	m168493/691/CCS|F;size=1	m11755/477/CCS|F;size=1	145	ITS1	no	427	519	427	0.279
chimera_m168703/1205/CCS|F;size=1_and_m114571/880/CCS|F;size=1_at_89_ITS1_reversed_no_1647	m168703/1205/CCS|F;size=1	m114571/880/CCS|F;size=1	89	ITS1	no	647	429	647	0.207
chimera_m466025/770/CCS|F;size=1_and_m191269/1077/CCS|F;size=1_at_93_ITS1_reversed_no_1648	m466025/770/CCS|F;size=1	m191269/1077/CCS|F;size=1	93	ITS1	no	571	596	571	0.156
chimera_m223673/661/CCS|F;size=1_and_m53828/517/CCS|F;size=1_at_360_ITS2_reversed_no_1649	m223673/661/CCS|F;size=1	m53828/517/CCS|F;size=1	360	ITS2	no	420	537	420	0.67
chimera_m221799/1262/CCS|F;size=1_and_m92091/595/CCS|F;size=1_at_362_ITS2_reversed_no_1650	m221799/1262/CCS|F;size=1	m92091/595/CCS|F;size=1	362	ITS2	no	458	580	458	0.624
chimera_m147212/1268/CCS|F;size=1_and_m227923/1992/CCS|F;size=1_at_360_ITS2_reversed_no_1651	m147212/1268/CCS|F;size=1	m227923/1992/CCS|F;size=1	360	ITS2	no	565	529	565	0.681
chimera_m27803/921/CCS|F;size=1_and_m248382/675/CCS|F;size=1_at_331_ITS2_reversed_yes_1652	m27803/921/CCS|F;size=1	m248382/675/CCS|F;size=1	331	ITS2	yes	586	458	586	0.723
chimera_m204708/660/CCS|F;size=1_and_m443818/1087/CCS|F;size=1_at_149_ITS1_reversed_no_1653	m204708/660/CCS|F;size=1	m443818/1087/CCS|F;size=1	149	ITS1	no	455	608	455	0.245
chimera_m195597/1222/CCS|F;size=1_and_m228373/1042/CCS|F;size=1_at_257_5.8S_reversed_no_1654	m195597/1222/CCS|F;size=1	m228373/1042/CCS|F;size=1	257	5.8S	no	445	614	445	0.419
chimera_m191024/847/CCS|F;size=1_and_m11986/720/CCS|F;size=1_at_119_ITS1_reversed_no_1655	m191024/847/CCS|F;size=1	m11986/720/CCS|F;size=1	119	ITS1	no	469	566	469	0.21
chimera_m284591/1240/CCS|F;size=1_and_m430987/1117/CCS|F;size=1_at_315_ITS2_reversed_no_1656	m284591/1240/CCS|F;size=1	m430987/1117/CCS|F;size=1	315	ITS2	no	600	622	600	0.506
chimera_m56100/1130/CCS|F;size=1_and_m132738/740/CCS|F;size=2_at_311_ITS2_reversed_no_1657	m56100/1130/CCS|F;size=1	m132738/740/CCS|F;size=2	311	ITS2	no	539	443	539	0.702
chimera_m285174/837/CCS|F;size=1_and_m395183/308/CCS|F;size=1_at_82_ITS1_reversed_no_1658	m285174/837/CCS|F;size=1	m395183/308/CCS|F;size=1	82	ITS1	no	308	488	308	0.168
chimera_m91296/1089/CCS|F;size=1_and_m3073/1315/CCS|F;size=1_at_439_ITS2_reversed_no_1659	m91296/1089/CCS|F;size=1	m3073/1315/CCS|F;size=1	439	ITS2	no	439	722	420	0.608
chimera_m488573/1396/CCS|F;size=1_and_m123950/1367/CCS|F;size=1_at_83_ITS1_reversed_no_1660	m488573/1396/CCS|F;size=1	m123950/1367/CCS|F;size=1	83	ITS1	no	528	541	528	0.153
chimera_m36109/1173/CCS|F;size=27_and_m79436/1033/CCS|F;size=1_at_205_ITS1_reversed_no_1661	m36109/1173/CCS|F;size=27	m79436/1033/CCS|F;size=1	205	ITS1	no	730	1099	730	0.187
chimera_m250777/483/CCS|F;size=1_and_m352842/555/CCS|T;size=1_at_209_ITS2_reversed_no_1662	m250777/483/CCS|F;size=1	m352842/555/CCS|T;size=1	209	ITS2	no	473	397	473	0.526
chimera_m80128/655/CCS|F;size=1_and_m209103/1730/CCS|F;size=1_at_101_ITS1_reversed_yes_1663	m80128/655/CCS|F;size=1	m209103/1730/CCS|F;size=1	101	ITS1	yes	547	472	547	0.214
chimera_m430782/728/CCS|F;size=1_and_m59679/678/CCS|F;size=1_at_247_5.8S_reversed_no_1664	m430782/728/CCS|F;size=1	m59679/678/CCS|F;size=1	247	5.8S	no	678	597	678	0.414
chimera_m294862/602/CCS|F;size=1_and_m193928/1460/CCS|F;size=1_at_310_ITS2_reversed_no_1665	m294862/602/CCS|F;size=1	m193928/1460/CCS|F;size=1	310	ITS2	no	671	448	671	0.692
chimera_m293419/1813/CCS|F;size=1_and_m99523/507/CCS|F;size=1_at_338_ITS2_reversed_no_1666	m293419/1813/CCS|F;size=1	m99523/507/CCS|F;size=1	338	ITS2	no	446	471	446	0.718
chimera_m224834/953/CCS|F;size=1_and_m53383/930/CCS|F;size=1_at_160_ITS1_reversed_no_1667	m224834/953/CCS|F;size=1	m53383/930/CCS|F;size=1	160	ITS1	no	664	538	664	0.297
chimera_m18265/1139/CCS|F;size=1_and_m440031/1048/CCS|F;size=1_at_324_ITS2_reversed_no_1668	m18265/1139/CCS|F;size=1	m440031/1048/CCS|F;size=1	324	ITS2	no	752	513	752	0.632
chimera_m400177/706/CCS|F;size=1_and_m21823/519/CCS|F;size=1_at_138_ITS1_reversed_no_1669	m400177/706/CCS|F;size=1	m21823/519/CCS|F;size=1	138	ITS1	no	412	619	412	0.223
chimera_m151454/798/CCS|F;size=1_and_m39043/1148/CCS|F;size=1_at_261_ITS2_reversed_no_1670	m151454/798/CCS|F;size=1	m39043/1148/CCS|F;size=1	261	ITS2	no	416	438	416	0.596
chimera_m168913/962/CCS|F;size=1_and_m39017/1505/CCS|F;size=1_at_291_ITS2_reversed_no_1671	m168913/962/CCS|F;size=1	m39017/1505/CCS|F;size=1	291	ITS2	no	432	598	432	0.487
chimera_m228025/607/CCS|F;size=1_and_m331157/1687/CCS|F;size=1_at_90_ITS1_reversed_no_1672	m228025/607/CCS|F;size=1	m331157/1687/CCS|F;size=1	90	ITS1	no	598	607	598	0.148
chimera_m73500/802/CCS|F;size=1_and_m11844/750/CCS|F;size=1_at_320_ITS2_reversed_no_1673	m73500/802/CCS|F;size=1	m11844/750/CCS|F;size=1	320	ITS2	no	433	495	433	0.646
chimera_m108478/582/CCS|F;size=1_and_m123153/466/CCS|F;size=1_at_305_ITS2_reversed_no_1674	m108478/582/CCS|F;size=1	m123153/466/CCS|F;size=1	305	ITS2	no	466	582	466	0.524
chimera_m132378/781/CCS|F;size=1_and_m204776/1444/CCS|F;size=1_at_273_ITS2_reversed_no_1675	m132378/781/CCS|F;size=1	m204776/1444/CCS|F;size=1	273	ITS2	no	577	484	577	0.564
chimera_m93600/1607/CCS|F;size=1_and_m113343/871/CCS|F;size=1_at_134_ITS1_reversed_no_1676	m93600/1607/CCS|F;size=1	m113343/871/CCS|F;size=1	134	ITS1	no	439	646	439	0.207
chimera_m153621/1080/CCS|F;size=1_and_m155263/858/CCS|F;size=1_at_324_ITS2_reversed_no_1677	m153621/1080/CCS|F;size=1	m155263/858/CCS|F;size=1	324	ITS2	no	579	490	579	0.661
chimera_m159944/668/CCS|F;size=1_and_m142210/714/CCS|F;size=1_at_126_ITS1_reversed_no_1678	m159944/668/CCS|F;size=1	m142210/714/CCS|F;size=1	126	ITS1	no	453	395	453	0.319
chimera_m41133/913/CCS|F;size=2_and_m176988/1309/CCS|F;size=2_at_20_ITS1_reversed_no_1679	m41133/913/CCS|F;size=2	m176988/1309/CCS|F;size=2	20	ITS1	no	453	483	453	0.041
chimera_m232724/1164/CCS|F;size=1_and_m40794/802/CCS|F;size=1_at_282_ITS2_reversed_yes_1680	m232724/1164/CCS|F;size=1	m40794/802/CCS|F;size=1	282	ITS2	yes	632	476	632	0.592
chimera_m266947/1065/CCS|F;size=1_and_m267576/532/CCS|F;size=1_at_231_5.8S_reversed_no_1681	m266947/1065/CCS|F;size=1	m267576/532/CCS|F;size=1	231	5.8S	no	418	608	418	0.38
chimera_m32474/1418/CCS|F;size=1_and_m141044/613/CCS|F;size=1_at_45_ITS1_reversed_no_1682	m32474/1418/CCS|F;size=1	m141044/613/CCS|F;size=1	45	ITS1	no	613	526	613	0.086
chimera_m32434/521/CCS|F;size=1_and_m79532/432/CCS|F;size=1_at_226_ITS2_reversed_no_1683	m32434/521/CCS|F;size=1	m79532/432/CCS|F;size=1	226	ITS2	no	365	468	365	0.483
chimera_m118060/647/CCS|F;size=1_and_m153867/894/CCS|F;size=1_at_321_ITS2_reversed_no_1684	m118060/647/CCS|F;size=1	m153867/894/CCS|F;size=1	321	ITS2	no	485	470	485	0.683
chimera_m39846/822/CCS|F;size=1_and_m172944/543/CCS|F;size=1_at_100_ITS1_reversed_no_1685	m39846/822/CCS|F;size=1	m172944/543/CCS|F;size=1	100	ITS1	no	543	631	543	0.158
chimera_m209872/1355/CCS|F;size=1_and_m33086/832/CCS|F;size=1_at_148_ITS1_reversed_no_1686	m209872/1355/CCS|F;size=1	m33086/832/CCS|F;size=1	148	ITS1	no	506	795	506	0.186
chimera_m205386/953/CCS|F;size=1_and_m140449/1058/CCS|F;size=1_at_90_ITS1_reversed_no_1687	m205386/953/CCS|F;size=1	m140449/1058/CCS|F;size=1	90	ITS1	no	506	506	506	0.178
chimera_m315483/1454/CCS|F;size=1_and_m162152/1549/CCS|F;size=1_at_661_ITS2_reversed_no_1688	m315483/1454/CCS|F;size=1	m162152/1549/CCS|F;size=1	661	ITS2	no	730	991	730	0.667
chimera_m249407/915/CCS|F;size=1_and_m372786/745/CCS|F;size=1_at_45_ITS1_reversed_no_1689	m249407/915/CCS|F;size=1	m372786/745/CCS|F;size=1	45	ITS1	no	745	569	745	0.079
chimera_m168239/1836/CCS|F;size=1_and_m166097/1014/CCS|F;size=1_at_64_ITS1_reversed_no_1690	m168239/1836/CCS|F;size=1	m166097/1014/CCS|F;size=1	64	ITS1	no	465	648	465	0.099
chimera_m172526/1081/CCS|F;size=1_and_m215084/1721/CCS|F;size=1_at_202_ITS1_reversed_no_1691	m172526/1081/CCS|F;size=1	m215084/1721/CCS|F;size=1	202	ITS1	no	498	831	498	0.243
chimera_m247542/687/CCS|F;size=1_and_m285570/1600/CCS|F;size=1_at_58_ITS1_reversed_no_1692	m247542/687/CCS|F;size=1	m285570/1600/CCS|F;size=1	58	ITS1	no	510	471	510	0.123
chimera_m270121/594/CCS|F;size=1_and_m48684/517/CCS|F;size=1_at_163_ITS1_reversed_yes_1693	m270121/594/CCS|F;size=1	m48684/517/CCS|F;size=1	163	ITS1	yes	451	594	451	0.274
chimera_m348653/726/CCS|F;size=1_and_m85077/834/CCS|F;size=1_at_371_ITS2_reversed_no_1694	m348653/726/CCS|F;size=1	m85077/834/CCS|F;size=1	371	ITS2	no	484	582	484	0.637
chimera_m50212/841/CCS|F;size=2_and_m120390/714/CCS|F;size=1_at_357_ITS2_reversed_no_1695	m50212/841/CCS|F;size=2	m120390/714/CCS|F;size=1	357	ITS2	no	502	483	502	0.739
chimera_m138800/763/CCS|F;size=1_and_m82573/742/CCS|F;size=2_at_39_ITS1_reversed_no_1696	m138800/763/CCS|F;size=1	m82573/742/CCS|F;size=2	39	ITS1	no	429	461	429	0.085
chimera_m24642/785/CCS|F;size=1_and_m99875/1097/CCS|F;size=1_at_555_ITS2_reversed_no_1697	m24642/785/CCS|F;size=1	m99875/1097/CCS|F;size=1	555	ITS2	no	555	785	472	0.707
chimera_m52789/1456/CCS|F;size=1_and_m224008/1324/CCS|F;size=1_at_191_ITS1_reversed_no_1698	m52789/1456/CCS|F;size=1	m224008/1324/CCS|F;size=1	191	ITS1	no	588	621	588	0.308
chimera_m155263/858/CCS|F;size=1_and_m217810/1481/CCS|F;size=1_at_120_ITS1_reversed_no_1699	m155263/858/CCS|F;size=1	m217810/1481/CCS|F;size=1	120	ITS1	no	432	579	432	0.207
chimera_m2047/848/CCS|F;size=1_and_m63127/794/CCS|F;size=2_at_54_ITS1_reversed_no_1700	m2047/848/CCS|F;size=1	m63127/794/CCS|F;size=2	54	ITS1	no	387	497	387	0.109
chimera_m356339/877/CCS|F;size=3_and_m286086/897/CCS|F;size=1_at_391_ITS2_reversed_no_1701	m356339/877/CCS|F;size=3	m286086/897/CCS|F;size=1	391	ITS2	no	560	632	560	0.619
chimera_m371291/837/CCS|F;size=1_and_m52074/496/CCS|F;size=1_at_375_ITS2_reversed_no_1702	m371291/837/CCS|F;size=1	m52074/496/CCS|F;size=1	375	ITS2	no	496	514	496	0.73
chimera_m257560/552/CCS|F;size=2_and_m19973/1193/CCS|F;size=1_at_67_ITS1_reversed_no_1703	m257560/552/CCS|F;size=2	m19973/1193/CCS|F;size=1	67	ITS1	no	604	487	604	0.138
chimera_m127938/426/CCS|F;size=1_and_m59562/511/CCS|F;size=1_at_321_ITS2_reversed_no_1704	m127938/426/CCS|F;size=1	m59562/511/CCS|F;size=1	321	ITS2	no	511	426	511	0.754
chimera_m162783/1200/CCS|F;size=1_and_m30672/576/CCS|F;size=1_at_97_ITS1_reversed_no_1705	m162783/1200/CCS|F;size=1	m30672/576/CCS|F;size=1	97	ITS1	no	576	594	576	0.163
chimera_m140663/774/CCS|F;size=1_and_m112899/526/CCS|F;size=1_at_121_ITS1_reversed_no_1706	m140663/774/CCS|F;size=1	m112899/526/CCS|F;size=1	121	ITS1	no	438	447	438	0.271
chimera_m198615/946/CCS|F;size=1_and_m203738/417/CCS|F;size=1_at_181_ITS1_reversed_no_1707	m198615/946/CCS|F;size=1	m203738/417/CCS|F;size=1	181	ITS1	no	417	582	417	0.311
chimera_m314105/1177/CCS|F;size=1_and_m192151/1220/CCS|F;size=1_at_130_ITS1_reversed_no_1708	m314105/1177/CCS|F;size=1	m192151/1220/CCS|F;size=1	130	ITS1	no	603	484	603	0.269
chimera_m222683/1319/CCS|F;size=1_and_m93473/1128/CCS|F;size=1_at_489_ITS2_reversed_no_1709	m222683/1319/CCS|F;size=1	m93473/1128/CCS|F;size=1	489	ITS2	no	668	609	668	0.803
chimera_m47796/960/CCS|F;size=1_and_m25698/795/CCS|F;size=1_at_105_ITS1_reversed_no_1710	m47796/960/CCS|F;size=1	m25698/795/CCS|F;size=1	105	ITS1	no	424	664	424	0.158
chimera_m251386/1731/CCS|F;size=1_and_m136929/1040/CCS|F;size=1_at_169_ITS1_reversed_no_1711	m251386/1731/CCS|F;size=1	m136929/1040/CCS|F;size=1	169	ITS1	no	447	619	447	0.273
chimera_m207079/664/CCS|F;size=1_and_m254331/626/CCS|F;size=1_at_253_ITS2_reversed_no_1712	m207079/664/CCS|F;size=1	m254331/626/CCS|F;size=1	253	ITS2	no	507	445	507	0.569
chimera_m29529/696/CCS|F;size=1_and_m38281/1106/CCS|F;size=1_at_416_ITS2_reversed_no_1713	m29529/696/CCS|F;size=1	m38281/1106/CCS|F;size=1	416	ITS2	no	520	631	520	0.659
chimera_m1599/607/CCS|F;size=1_and_m92353/504/CCS|F;size=1_at_132_ITS1_reversed_no_1714	m1599/607/CCS|F;size=1	m92353/504/CCS|F;size=1	132	ITS1	no	428	482	428	0.274
chimera_m9667/801/CCS|F;size=1_and_m157209/1135/CCS|F;size=1_at_404_ITS2_reversed_no_1715	m9667/801/CCS|F;size=1	m157209/1135/CCS|F;size=1	404	ITS2	no	454	487	454	0.83
chimera_m247393/354/CCS|F;size=1_and_m164203/968/CCS|F;size=1_at_107_ITS1_reversed_no_1716	m247393/354/CCS|F;size=1	m164203/968/CCS|F;size=1	107	ITS1	no	505	354	505	0.302
chimera_m460530/1369/CCS|T;size=1_and_m122707/791/CCS|F;size=1_at_234_ITS2_reversed_no_1717	m460530/1369/CCS|T;size=1	m122707/791/CCS|F;size=1	234	ITS2	no	707	445	707	0.526
chimera_m300549/1007/CCS|F;size=1_and_m192845/922/CCS|F;size=1_at_277_ITS2_reversed_no_1718	m300549/1007/CCS|F;size=1	m192845/922/CCS|F;size=1	277	ITS2	no	532	426	532	0.65
chimera_m75073/1456/CCS|F;size=1_and_m58858/847/CCS|F;size=1_at_387_ITS2_reversed_no_1719	m75073/1456/CCS|F;size=1	m58858/847/CCS|F;size=1	387	ITS2	no	518	598	518	0.647
chimera_m218231/1256/CCS|F;size=1_and_m31279/1387/CCS|F;size=1_at_148_ITS1_reversed_yes_1720	m218231/1256/CCS|F;size=1	m31279/1387/CCS|F;size=1	148	ITS1	yes	506	560	506	0.264
chimera_m128554/1235/CCS|F;size=1_and_m77595/1393/CCS|F;size=1_at_282_ITS2_reversed_yes_1721	m128554/1235/CCS|F;size=1	m77595/1393/CCS|F;size=1	282	ITS2	yes	581	538	581	0.524
chimera_m147024/1045/CCS|F;size=1_and_m108364/883/CCS|F;size=1_at_429_ITS2_reversed_no_1722	m147024/1045/CCS|F;size=1	m108364/883/CCS|F;size=1	429	ITS2	no	683	489	683	0.877
chimera_m71004/563/CCS|F;size=1_and_m278113/1183/CCS|F;size=1_at_365_ITS2_reversed_no_1723	m71004/563/CCS|F;size=1	m278113/1183/CCS|F;size=1	365	ITS2	no	645	563	645	0.648
chimera_m85682/1103/CCS|F;size=1_and_m183047/1326/CCS|F;size=1_at_144_ITS1_reversed_no_1724	m85682/1103/CCS|F;size=1	m183047/1326/CCS|F;size=1	144	ITS1	no	546	563	546	0.256
chimera_m120261/755/CCS|F;size=1_and_m283567/1259/CCS|F;size=1_at_111_ITS1_reversed_no_1725	m120261/755/CCS|F;size=1	m283567/1259/CCS|F;size=1	111	ITS1	no	533	411	533	0.27
chimera_m188186/1177/CCS|F;size=1_and_m194674/583/CCS|F;size=1_at_319_ITS2_reversed_no_1726	m188186/1177/CCS|F;size=1	m194674/583/CCS|F;size=1	319	ITS2	no	445	547	445	0.583
chimera_m29699/1191/CCS|F;size=1_and_m184013/507/CCS|F;size=1_at_41_ITS1_reversed_yes_1727	m29699/1191/CCS|F;size=1	m184013/507/CCS|F;size=1	41	ITS1	yes	507	730	507	0.056
chimera_m237647/706/CCS|F;size=1_and_m210421/1050/CCS|F;size=1_at_277_ITS2_reversed_no_1728	m237647/706/CCS|F;size=1	m210421/1050/CCS|F;size=1	277	ITS2	no	505	479	505	0.578
chimera_m6045/1879/CCS|F;size=69_and_m205542/600/CCS|F;size=1_at_476_ITS2_reversed_no_1729	m6045/1879/CCS|F;size=69	m205542/600/CCS|F;size=1	476	ITS2	no	476	671	411	0.709
chimera_m91865/1843/CCS|F;size=1_and_m85859/1078/CCS|F;size=1_at_61_ITS1_reversed_no_1730	m91865/1843/CCS|F;size=1	m85859/1078/CCS|F;size=1	61	ITS1	no	551	547	551	0.112
chimera_m157397/1387/CCS|F;size=1_and_m299872/899/CCS|F;size=1_at_377_ITS2_reversed_no_1731	m157397/1387/CCS|F;size=1	m299872/899/CCS|F;size=1	377	ITS2	no	586	574	586	0.657
chimera_m404856/787/CCS|F;size=1_and_m132266/735/CCS|F;size=1_at_479_ITS2_reversed_no_1732	m404856/787/CCS|F;size=1	m132266/735/CCS|F;size=1	479	ITS2	no	735	626	735	0.765
chimera_m41787/1667/CCS|F;size=1_and_m1322/929/CCS|F;size=2_at_279_ITS2_reversed_no_1733	m41787/1667/CCS|F;size=1	m1322/929/CCS|F;size=2	279	ITS2	no	452	486	452	0.574
chimera_m366360/1204/CCS|F;size=1_and_m31829/1331/CCS|F;size=1_at_168_ITS1_reversed_no_1734	m366360/1204/CCS|F;size=1	m31829/1331/CCS|F;size=1	168	ITS1	no	524	645	524	0.26
chimera_m57622/564/CCS|F;size=1_and_m22183/800/CCS|F;size=1_at_380_ITS2_reversed_no_1735	m57622/564/CCS|F;size=1	m22183/800/CCS|F;size=1	380	ITS2	no	503	540	503	0.704
chimera_m204179/1024/CCS|F;size=1_and_m135983/1169/CCS|F;size=1_at_130_ITS1_reversed_no_1736	m204179/1024/CCS|F;size=1	m135983/1169/CCS|F;size=1	130	ITS1	no	577	525	577	0.248
chimera_m229725/662/CCS|F;size=1_and_m86968/1398/CCS|F;size=1_at_248_ITS2_reversed_yes_1737	m229725/662/CCS|F;size=1	m86968/1398/CCS|F;size=1	248	ITS2	yes	566	395	566	0.628
chimera_m73225/771/CCS|F;size=1_and_m207207/1272/CCS|F;size=1_at_314_ITS2_reversed_no_1738	m73225/771/CCS|F;size=1	m207207/1272/CCS|F;size=1	314	ITS2	no	637	441	637	0.712
chimera_m129842/1092/CCS|F;size=1_and_m205589/1128/CCS|F;size=2_at_148_ITS1_reversed_no_1739	m129842/1092/CCS|F;size=1	m205589/1128/CCS|F;size=2	148	ITS1	no	646	607	646	0.244
chimera_m800/1807/CCS|F;size=40_and_m61925/853/CCS|F;size=1_at_333_ITS2_reversed_no_1740	m800/1807/CCS|F;size=40	m61925/853/CCS|F;size=1	333	ITS2	no	499	531	499	0.627
chimera_m166928/1346/CCS|F;size=1_and_m5623/1541/CCS|F;size=1_at_332_ITS2_reversed_no_1741	m166928/1346/CCS|F;size=1	m5623/1541/CCS|F;size=1	332	ITS2	no	456	540	456	0.615
chimera_m75118/1462/CCS|F;size=1_and_m193395/832/CCS|F;size=1_at_132_ITS1_reversed_no_1742	m75118/1462/CCS|F;size=1	m193395/832/CCS|F;size=1	132	ITS1	no	589	533	589	0.248
chimera_m176004/1485/CCS|F;size=1_and_m56126/529/CCS|F;size=2_at_504_ITS2_reversed_no_1743	m176004/1485/CCS|F;size=1	m56126/529/CCS|F;size=2	504	ITS2	no	504	737	493	0.684
chimera_m305323/701/CCS|F;size=1_and_m136551/841/CCS|F;size=1_at_409_ITS2_reversed_no_1744	m305323/701/CCS|F;size=1	m136551/841/CCS|F;size=1	409	ITS2	no	483	614	483	0.666
chimera_m54380/697/CCS|F;size=2_and_m155715/751/CCS|F;size=1_at_318_ITS2_reversed_no_1745	m54380/697/CCS|F;size=2	m155715/751/CCS|F;size=1	318	ITS2	no	545	522	545	0.609
chimera_m361017/831/CCS|T;size=1_and_m297094/551/CCS|F;size=1_at_365_ITS2_reversed_no_1746	m361017/831/CCS|T;size=1	m297094/551/CCS|F;size=1	365	ITS2	no	490	491	490	0.743
chimera_m139356/593/CCS|F;size=1_and_m211262/856/CCS|F;size=1_at_373_ITS2_reversed_no_1747	m139356/593/CCS|F;size=1	m211262/856/CCS|F;size=1	373	ITS2	no	536	437	536	0.854
chimera_m103024/863/CCS|F;size=1_and_m197318/787/CCS|F;size=1_at_344_ITS2_reversed_no_1748	m103024/863/CCS|F;size=1	m197318/787/CCS|F;size=1	344	ITS2	no	516	506	516	0.68
chimera_m18221/569/CCS|F;size=1_and_m100475/1184/CCS|F;size=1_at_71_ITS1_reversed_no_1749	m18221/569/CCS|F;size=1	m100475/1184/CCS|F;size=1	71	ITS1	no	691	426	691	0.167
chimera_m195651/1813/CCS|F;size=1_and_m183118/734/CCS|F;size=1_at_347_ITS2_reversed_no_1750	m195651/1813/CCS|F;size=1	m183118/734/CCS|F;size=1	347	ITS2	no	485	534	485	0.65
chimera_m225808/398/CCS|F;size=1_and_m72976/603/CCS|F;size=1_at_176_5.8S_reversed_no_1751	m225808/398/CCS|F;size=1	m72976/603/CCS|F;size=1	176	5.8S	no	505	398	505	0.442
chimera_m9857/746/CCS|F;size=1_and_m397705/958/CCS|F;size=1_at_268_ITS2_reversed_no_1752	m9857/746/CCS|F;size=1	m397705/958/CCS|F;size=1	268	ITS2	no	665	468	665	0.573
chimera_m266193/1387/CCS|F;size=1_and_m120488/513/CCS|F;size=1_at_450_ITS2_reversed_no_1753	m266193/1387/CCS|F;size=1	m120488/513/CCS|F;size=1	450	ITS2	no	460	603	460	0.746
chimera_m291327/1609/CCS|F;size=1_and_m293493/1552/CCS|F;size=1_at_138_ITS1_reversed_no_1754	m291327/1609/CCS|F;size=1	m293493/1552/CCS|F;size=1	138	ITS1	no	510	600	510	0.23
chimera_m208021/633/CCS|F;size=1_and_m168957/600/CCS|F;size=1_at_71_ITS1_reversed_no_1755	m208021/633/CCS|F;size=1	m168957/600/CCS|F;size=1	71	ITS1	no	559	527	559	0.135
chimera_m398051/636/CCS|F;size=1_and_m54933/1384/CCS|F;size=1_at_364_ITS2_reversed_no_1756	m398051/636/CCS|F;size=1	m54933/1384/CCS|F;size=1	364	ITS2	no	479	488	479	0.746
chimera_m42010/822/CCS|F;size=1_and_m5653/457/CCS|F;size=1_at_355_ITS2_reversed_no_1757	m42010/822/CCS|F;size=1	m5653/457/CCS|F;size=1	355	ITS2	no	382	485	382	0.732
chimera_m252724/458/CCS|F;size=1_and_m166312/1304/CCS|F;size=1_at_126_ITS1_reversed_no_1758	m252724/458/CCS|F;size=1	m166312/1304/CCS|F;size=1	126	ITS1	no	520	458	520	0.275
chimera_m268894/1540/CCS|F;size=1_and_m457206/633/CCS|T;size=1_at_283_ITS2_reversed_no_1759	m268894/1540/CCS|F;size=1	m457206/633/CCS|T;size=1	283	ITS2	no	414	408	414	0.694
chimera_m275408/604/CCS|F;size=1_and_m214001/1056/CCS|F;size=1_at_85_ITS1_reversed_no_1760	m275408/604/CCS|F;size=1	m214001/1056/CCS|F;size=1	85	ITS1	no	520	468	520	0.182
chimera_m194137/668/CCS|F;size=1_and_m290867/1268/CCS|F;size=1_at_144_ITS1_reversed_no_1761	m194137/668/CCS|F;size=1	m290867/1268/CCS|F;size=1	144	ITS1	no	781	533	781	0.27
chimera_m455992/922/CCS|F;size=1_and_m180750/974/CCS|F;size=1_at_283_ITS2_reversed_no_1762	m455992/922/CCS|F;size=1	m180750/974/CCS|F;size=1	283	ITS2	no	548	555	548	0.51
chimera_m272535/590/CCS|F;size=1_and_m13439/825/CCS|F;size=1_at_97_ITS1_reversed_no_1763	m272535/590/CCS|F;size=1	m13439/825/CCS|F;size=1	97	ITS1	no	578	511	578	0.19
chimera_m49139/1071/CCS|F;size=1_and_m4443/649/CCS|F;size=1_at_155_ITS1_reversed_no_1764	m49139/1071/CCS|F;size=1	m4443/649/CCS|F;size=1	155	ITS1	no	614	616	614	0.252
chimera_m153405/665/CCS|F;size=1_and_m286453/1561/CCS|F;size=1_at_186_5.8S_reversed_no_1765	m153405/665/CCS|F;size=1	m286453/1561/CCS|F;size=1	186	5.8S	no	572	419	572	0.444
chimera_m75016/985/CCS|F;size=1_and_m177728/829/CCS|F;size=1_at_19_ITS1_reversed_no_1766	m75016/985/CCS|F;size=1	m177728/829/CCS|F;size=1	19	ITS1	no	454	463	454	0.041
chimera_m60869/1381/CCS|F;size=1_and_m19639/1002/CCS|F;size=1_at_84_ITS1_reversed_no_1767	m60869/1381/CCS|F;size=1	m19639/1002/CCS|F;size=1	84	ITS1	no	506	435	506	0.193
chimera_m66703/786/CCS|F;size=1_and_m230178/1499/CCS|F;size=1_at_381_ITS2_reversed_no_1768	m66703/786/CCS|F;size=1	m230178/1499/CCS|F;size=1	381	ITS2	no	451	663	451	0.575
chimera_m104489/506/CCS|F;size=1_and_m68838/706/CCS|F;size=2_at_121_ITS1_reversed_no_1769	m104489/506/CCS|F;size=1	m68838/706/CCS|F;size=2	121	ITS1	no	525	506	525	0.239
chimera_m327039/1343/CCS|F;size=1_and_m361420/619/CCS|F;size=1_at_243_ITS2_reversed_no_1770	m327039/1343/CCS|F;size=1	m361420/619/CCS|F;size=1	243	ITS2	no	442	422	442	0.576
chimera_m151702/970/CCS|T;size=1_and_m235018/901/CCS|F;size=1_at_73_ITS1_reversed_yes_1771	m151702/970/CCS|T;size=1	m235018/901/CCS|F;size=1	73	ITS1	yes	631	398	631	0.183
chimera_m49557/865/CCS|F;size=1_and_m188238/1510/CCS|F;size=1_at_420_ITS2_reversed_no_1772	m49557/865/CCS|F;size=1	m188238/1510/CCS|F;size=1	420	ITS2	no	670	528	670	0.795
chimera_m238830/835/CCS|F;size=1_and_m69748/427/CCS|T;size=1_at_180_ITS1_reversed_no_1773	m238830/835/CCS|F;size=1	m69748/427/CCS|T;size=1	180	ITS1	no	427	624	427	0.288
chimera_m297444/911/CCS|F;size=1_and_m253241/1894/CCS|F;size=1_at_85_ITS1_reversed_no_1774	m297444/911/CCS|F;size=1	m253241/1894/CCS|F;size=1	85	ITS1	no	591	490	591	0.173
chimera_m173686/576/CCS|F;size=1_and_m184740/1055/CCS|F;size=1_at_362_ITS2_reversed_no_1775	m173686/576/CCS|F;size=1	m184740/1055/CCS|F;size=1	362	ITS2	no	617	551	617	0.657
chimera_m100957/1778/CCS|F;size=1_and_m22594/625/CCS|F;size=1_at_244_5.8S_reversed_no_1776	m100957/1778/CCS|F;size=1	m22594/625/CCS|F;size=1	244	5.8S	no	625	557	625	0.438
chimera_m62457/1082/CCS|F;size=1_and_m291205/923/CCS|F;size=1_at_306_ITS2_reversed_no_1777	m62457/1082/CCS|F;size=1	m291205/923/CCS|F;size=1	306	ITS2	no	521	497	521	0.616
chimera_m143728/1087/CCS|F;size=1_and_m146096/479/CCS|F;size=1_at_300_ITS2_reversed_no_1778	m143728/1087/CCS|F;size=1	m146096/479/CCS|F;size=1	300	ITS2	no	479	519	479	0.578
chimera_m197234/907/CCS|F;size=1_and_m311930/537/CCS|F;size=1_at_96_ITS1_reversed_no_1779	m197234/907/CCS|F;size=1	m311930/537/CCS|F;size=1	96	ITS1	no	537	509	537	0.189
chimera_m297114/1452/CCS|F;size=1_and_m118575/926/CCS|F;size=1_at_168_ITS1_reversed_no_1780	m297114/1452/CCS|F;size=1	m118575/926/CCS|F;size=1	168	ITS1	no	480	594	480	0.283
chimera_m267073/1356/CCS|F;size=1_and_m185384/901/CCS|F;size=1_at_124_ITS1_reversed_no_1781	m267073/1356/CCS|F;size=1	m185384/901/CCS|F;size=1	124	ITS1	no	588	560	588	0.221
chimera_m294421/1604/CCS|F;size=1_and_m237632/1340/CCS|F;size=1_at_84_ITS1_reversed_no_1782	m294421/1604/CCS|F;size=1	m237632/1340/CCS|F;size=1	84	ITS1	no	512	597	512	0.141
chimera_m253571/1219/CCS|F;size=1_and_m54900/802/CCS|F;size=1_at_326_ITS2_reversed_no_1783	m253571/1219/CCS|F;size=1	m54900/802/CCS|F;size=1	326	ITS2	no	422	546	422	0.597
chimera_m98844/627/CCS|F;size=1_and_m222002/729/CCS|F;size=1_at_327_ITS2_reversed_no_1784	m98844/627/CCS|F;size=1	m222002/729/CCS|F;size=1	327	ITS2	no	579	453	579	0.722
chimera_m2653/1150/CCS|F;size=1_and_m190019/1237/CCS|F;size=1_at_158_ITS1_reversed_no_1785	m2653/1150/CCS|F;size=1	m190019/1237/CCS|F;size=1	158	ITS1	no	495	473	495	0.334
chimera_m917/1062/CCS|F;size=176_and_m66929/1426/CCS|F;size=1_at_352_ITS2_reversed_no_1786	m917/1062/CCS|F;size=176	m66929/1426/CCS|F;size=1	352	ITS2	no	532	505	532	0.697
chimera_m39587/1675/CCS|F;size=3_and_m270618/866/CCS|F;size=1_at_306_ITS2_reversed_no_1787	m39587/1675/CCS|F;size=3	m270618/866/CCS|F;size=1	306	ITS2	no	589	532	589	0.575
chimera_m112824/646/CCS|F;size=1_and_m256728/957/CCS|F;size=1_at_78_ITS1_reversed_no_1788	m112824/646/CCS|F;size=1	m256728/957/CCS|F;size=1	78	ITS1	no	487	592	487	0.132
chimera_m194733/1543/CCS|F;size=1_and_m128567/1524/CCS|F;size=1_at_491_ITS2_reversed_no_1789	m194733/1543/CCS|F;size=1	m128567/1524/CCS|F;size=1	491	ITS2	no	563	670	563	0.733
chimera_m7280/772/CCS|F;size=1_and_m240747/890/CCS|F;size=1_at_113_ITS1_reversed_no_1790	m7280/772/CCS|F;size=1	m240747/890/CCS|F;size=1	113	ITS1	no	507	772	507	0.146
chimera_m373105/563/CCS|F;size=1_and_m191076/1368/CCS|F;size=1_at_177_ITS1_reversed_no_1791	m373105/563/CCS|F;size=1	m191076/1368/CCS|F;size=1	177	ITS1	no	477	563	477	0.314
chimera_m176461/1391/CCS|F;size=1_and_m199180/2205/CCS|F;size=3_at_303_5.8S_reversed_no_1792	m176461/1391/CCS|F;size=1	m199180/2205/CCS|F;size=3	303	5.8S	no	480	646	480	0.469
chimera_m94084/758/CCS|F;size=1_and_m206916/1162/CCS|F;size=1_at_176_5.8S_reversed_no_1793	m94084/758/CCS|F;size=1	m206916/1162/CCS|F;size=1	176	5.8S	no	550	491	550	0.358
chimera_m268514/1042/CCS|F;size=1_and_m198845/877/CCS|F;size=1_at_165_5.8S_reversed_no_1794	m268514/1042/CCS|F;size=1	m198845/877/CCS|F;size=1	165	5.8S	no	425	444	425	0.372
chimera_m118300/615/CCS|F;size=1_and_m358936/629/CCS|F;size=1_at_351_ITS2_reversed_yes_1795	m118300/615/CCS|F;size=1	m358936/629/CCS|F;size=1	351	ITS2	yes	491	513	491	0.684
chimera_m225017/1023/CCS|F;size=1_and_m245200/689/CCS|F;size=1_at_499_ITS2_reversed_no_1796	m225017/1023/CCS|F;size=1	m245200/689/CCS|F;size=1	499	ITS2	no	499	634	409	0.787
chimera_m228039/485/CCS|F;size=1_and_m34353/833/CCS|F;size=1_at_155_ITS1_reversed_no_1797	m228039/485/CCS|F;size=1	m34353/833/CCS|F;size=1	155	ITS1	no	744	485	744	0.32
chimera_m100/315/CCS|F;size=1_and_m159689/493/CCS|F;size=1_at_61_ITS1_reversed_no_1798	m100/315/CCS|F;size=1	m159689/493/CCS|F;size=1	61	ITS1	no	395	315	395	0.194
chimera_m34498/1481/CCS|F;size=3_and_m324989/1258/CCS|F;size=1_at_119_ITS1_reversed_no_1799	m34498/1481/CCS|F;size=3	m324989/1258/CCS|F;size=1	119	ITS1	no	663	582	663	0.204
chimera_m285519/827/CCS|F;size=1_and_m2412/1785/CCS|F;size=1_at_253_ITS2_reversed_no_1800	m285519/827/CCS|F;size=1	m2412/1785/CCS|F;size=1	253	ITS2	no	566	455	566	0.556
chimera_m268459/803/CCS|F;size=1_and_m31567/778/CCS|F;size=1_at_122_ITS1_reversed_no_1801	m268459/803/CCS|F;size=1	m31567/778/CCS|F;size=1	122	ITS1	no	461	589	461	0.207
chimera_m140144/1255/CCS|F;size=1_and_m2306/1501/CCS|F;size=1_at_383_ITS2_reversed_no_1802	m140144/1255/CCS|F;size=1	m2306/1501/CCS|F;size=1	383	ITS2	no	409	666	409	0.575
chimera_m445580/1032/CCS|T;size=1_and_m194904/1309/CCS|F;size=1_at_118_ITS1_reversed_no_1803	m445580/1032/CCS|T;size=1	m194904/1309/CCS|F;size=1	118	ITS1	no	467	414	467	0.285
chimera_m165667/565/CCS|F;size=1_and_m136741/966/CCS|F;size=1_at_111_ITS1_reversed_no_1804	m165667/565/CCS|F;size=1	m136741/966/CCS|F;size=1	111	ITS1	no	530	427	530	0.26
chimera_m209504/448/CCS|F;size=1_and_m79985/830/CCS|F;size=2_at_216_ITS2_reversed_no_1805	m209504/448/CCS|F;size=1	m79985/830/CCS|F;size=2	216	ITS2	no	400	448	400	0.482
chimera_m65631/594/CCS|F;size=1_and_m359321/371/CCS|F;size=1_at_92_ITS1_reversed_no_1806	m65631/594/CCS|F;size=1	m359321/371/CCS|F;size=1	92	ITS1	no	371	511	371	0.18
chimera_m232633/1522/CCS|F;size=1_and_m11065/476/CCS|F;size=1_at_57_ITS1_reversed_yes_1807	m232633/1522/CCS|F;size=1	m11065/476/CCS|F;size=1	57	ITS1	yes	390	418	390	0.136
chimera_m26097/740/CCS|F;size=2_and_m72776/938/CCS|F;size=2_at_174_ITS1_reversed_no_1808	m26097/740/CCS|F;size=2	m72776/938/CCS|F;size=2	174	ITS1	no	698	508	698	0.343
chimera_m293603/809/CCS|F;size=1_and_m83729/712/CCS|F;size=1_at_140_ITS1_reversed_no_1809	m293603/809/CCS|F;size=1	m83729/712/CCS|F;size=1	140	ITS1	no	529	401	529	0.349
chimera_m76329/1024/CCS|F;size=1_and_m20431/758/CCS|F;size=1_at_349_ITS2_reversed_no_1810	m76329/1024/CCS|F;size=1	m20431/758/CCS|F;size=1	349	ITS2	no	463	495	463	0.705
chimera_m29156/370/CCS|F;size=1_and_m133676/590/CCS|F;size=1_at_91_ITS1_reversed_no_1811	m29156/370/CCS|F;size=1	m133676/590/CCS|F;size=1	91	ITS1	no	469	370	469	0.246
chimera_m20384/627/CCS|F;size=1_and_m4959/891/CCS|F;size=1_at_114_ITS1_reversed_no_1812	m20384/627/CCS|F;size=1	m4959/891/CCS|F;size=1	114	ITS1	no	548	572	548	0.199
chimera_m77235/380/CCS|F;size=1_and_m381587/615/CCS|F;size=1_at_185_ITS2_reversed_no_1813	m77235/380/CCS|F;size=1	m381587/615/CCS|F;size=1	185	ITS2	no	445	380	445	0.487
chimera_m248015/675/CCS|F;size=1_and_m51112/1076/CCS|F;size=1_at_130_ITS1_reversed_no_1814	m248015/675/CCS|F;size=1	m51112/1076/CCS|F;size=1	130	ITS1	no	599	454	599	0.286
chimera_m1157/647/CCS|F;size=1_and_m132595/1572/CCS|F;size=1_at_318_ITS2_reversed_no_1815	m1157/647/CCS|F;size=1	m132595/1572/CCS|F;size=1	318	ITS2	no	599	524	599	0.607
chimera_m86746/621/CCS|F;size=1_and_m144752/1347/CCS|F;size=1_at_416_ITS2_reversed_no_1816	m86746/621/CCS|F;size=1	m144752/1347/CCS|F;size=1	416	ITS2	no	704	522	704	0.797
chimera_m95709/1294/CCS|F;size=1_and_m273874/877/CCS|F;size=1_at_95_ITS1_reversed_no_1817	m95709/1294/CCS|F;size=1	m273874/877/CCS|F;size=1	95	ITS1	no	459	699	459	0.136
chimera_m120231/1454/CCS|F;size=1_and_m51336/1683/CCS|F;size=1_at_215_5.8S_reversed_no_1818	m120231/1454/CCS|F;size=1	m51336/1683/CCS|F;size=1	215	5.8S	no	499	611	499	0.352
chimera_m218289/605/CCS|F;size=1_and_m256995/943/CCS|F;size=1_at_278_ITS2_reversed_no_1819	m218289/605/CCS|F;size=1	m256995/943/CCS|F;size=1	278	ITS2	no	456	481	456	0.578
chimera_m224933/1613/CCS|F;size=1_and_m218297/1327/CCS|F;size=1_at_302_ITS2_reversed_no_1820	m224933/1613/CCS|F;size=1	m218297/1327/CCS|F;size=1	302	ITS2	no	541	528	541	0.572
chimera_m469052/1468/CCS|F;size=1_and_m418336/1492/CCS|F;size=1_at_350_ITS2_reversed_no_1821	m469052/1468/CCS|F;size=1	m418336/1492/CCS|F;size=1	350	ITS2	no	962	586	962	0.597
chimera_m10943/728/CCS|F;size=1_and_m17259/1028/CCS|F;size=1_at_128_ITS1_reversed_no_1822	m10943/728/CCS|F;size=1	m17259/1028/CCS|F;size=1	128	ITS1	no	542	413	542	0.31
chimera_m76470/1532/CCS|F;size=1_and_m320917/1048/CCS|F;size=2_at_358_ITS2_reversed_no_1823	m76470/1532/CCS|F;size=1	m320917/1048/CCS|F;size=2	358	ITS2	no	416	560	416	0.639
chimera_m72756/1230/CCS|F;size=1_and_m393294/1425/CCS|F;size=1_at_390_ITS2_reversed_no_1824	m72756/1230/CCS|F;size=1	m393294/1425/CCS|F;size=1	390	ITS2	no	446	606	446	0.644
chimera_m241612/914/CCS|F;size=1_and_m83671/556/CCS|F;size=1_at_429_ITS2_reversed_no_1825	m241612/914/CCS|F;size=1	m83671/556/CCS|F;size=1	429	ITS2	no	556	643	556	0.667
chimera_m219763/897/CCS|F;size=1_and_m290/489/CCS|F;size=1_at_345_ITS2_reversed_no_1826	m219763/897/CCS|F;size=1	m290/489/CCS|F;size=1	345	ITS2	no	489	494	489	0.698
chimera_m191232/582/CCS|F;size=1_and_m99259/1741/CCS|F;size=1_at_50_ITS1_reversed_no_1827	m191232/582/CCS|F;size=1	m99259/1741/CCS|F;size=1	50	ITS1	no	645	494	645	0.101
chimera_m60239/1045/CCS|F;size=2_and_m255551/688/CCS|F;size=1_at_252_5.8S_reversed_no_1828	m60239/1045/CCS|F;size=2	m255551/688/CCS|F;size=1	252	5.8S	no	466	604	466	0.417
chimera_m133727/530/CCS|F;size=1_and_m270591/1177/CCS|F;size=1_at_313_ITS2_reversed_no_1829	m133727/530/CCS|F;size=1	m270591/1177/CCS|F;size=1	313	ITS2	no	672	530	672	0.591
chimera_m147969/1425/CCS|F;size=1_and_m149016/849/CCS|F;size=1_at_71_ITS1_reversed_no_1830	m147969/1425/CCS|F;size=1	m149016/849/CCS|F;size=1	71	ITS1	no	547	570	547	0.125
chimera_m143728/1087/CCS|F;size=1_and_m315162/723/CCS|F;size=1_at_325_ITS2_reversed_no_1831	m143728/1087/CCS|F;size=1	m315162/723/CCS|F;size=1	325	ITS2	no	559	519	559	0.626
chimera_m95833/987/CCS|F;size=2_and_m308503/869/CCS|F;size=1_at_181_ITS1_reversed_no_1832	m95833/987/CCS|F;size=2	m308503/869/CCS|F;size=1	181	ITS1	no	542	608	542	0.298
chimera_m270106/1933/CCS|F;size=1_and_m123601/1251/CCS|F;size=1_at_285_ITS2_reversed_yes_1833	m270106/1933/CCS|F;size=1	m123601/1251/CCS|F;size=1	285	ITS2	yes	425	574	425	0.497
chimera_m225553/1396/CCS|F;size=1_and_m294864/891/CCS|F;size=1_at_365_ITS2_reversed_no_1834	m225553/1396/CCS|F;size=1	m294864/891/CCS|F;size=1	365	ITS2	no	626	712	626	0.513
chimera_m74083/969/CCS|F;size=1_and_m4458/419/CCS|F;size=1_at_109_ITS1_reversed_no_1835	m74083/969/CCS|F;size=1	m4458/419/CCS|F;size=1	109	ITS1	no	419	567	419	0.192
chimera_m15093/561/CCS|F;size=1_and_m214987/873/CCS|F;size=2_at_129_ITS1_reversed_yes_1836	m15093/561/CCS|F;size=1	m214987/873/CCS|F;size=2	129	ITS1	yes	475	505	475	0.255
chimera_m315165/457/CCS|F;size=1_and_m43929/1288/CCS|F;size=1_at_130_ITS1_reversed_yes_1837	m315165/457/CCS|F;size=1	m43929/1288/CCS|F;size=1	130	ITS1	yes	663	457	663	0.284
chimera_m224008/1324/CCS|F;size=1_and_m132234/1060/CCS|F;size=1_at_361_ITS2_reversed_no_1838	m224008/1324/CCS|F;size=1	m132234/1060/CCS|F;size=1	361	ITS2	no	556	588	556	0.614
chimera_m200758/633/CCS|F;size=1_and_m177/1374/CCS|F;size=2_at_359_ITS2_reversed_no_1839	m200758/633/CCS|F;size=1	m177/1374/CCS|F;size=2	359	ITS2	no	447	521	447	0.689
chimera_m5482/830/CCS|F;size=1_and_m371024/632/CCS|F;size=1_at_345_ITS2_reversed_no_1840	m5482/830/CCS|F;size=1	m371024/632/CCS|F;size=1	345	ITS2	no	501	500	501	0.69
chimera_m144636/530/CCS|F;size=1_and_m104442/1145/CCS|F;size=1_at_89_ITS1_reversed_yes_1841	m144636/530/CCS|F;size=1	m104442/1145/CCS|F;size=1	89	ITS1	yes	497	530	497	0.168
chimera_m275171/528/CCS|F;size=1_and_m328294/848/CCS|F;size=1_at_332_ITS2_reversed_no_1842	m275171/528/CCS|F;size=1	m328294/848/CCS|F;size=1	332	ITS2	no	682	442	682	0.751
chimera_m84530/418/CCS|F;size=1_and_m76589/376/CCS|F;size=1_at_73_ITS1_reversed_no_1843	m84530/418/CCS|F;size=1	m76589/376/CCS|F;size=1	73	ITS1	no	376	418	376	0.175
chimera_m408999/858/CCS|F;size=1_and_m42010/822/CCS|F;size=1_at_91_ITS1_reversed_no_1844	m408999/858/CCS|F;size=1	m42010/822/CCS|F;size=1	91	ITS1	no	485	514	485	0.177
chimera_m325246/1491/CCS|F;size=1_and_m84760/1784/CCS|F;size=1_at_787_ITS2_reversed_no_1845	m325246/1491/CCS|F;size=1	m84760/1784/CCS|F;size=1	787	ITS2	no	787	1001	610	0.786
chimera_m37844/911/CCS|F;size=2_and_m29805/619/CCS|F;size=1_at_358_ITS2_reversed_no_1846	m37844/911/CCS|F;size=2	m29805/619/CCS|F;size=1	358	ITS2	no	449	620	449	0.577
chimera_m336189/740/CCS|F;size=1_and_m51116/1180/CCS|F;size=2_at_163_ITS1_reversed_no_1847	m336189/740/CCS|F;size=1	m51116/1180/CCS|F;size=2	163	ITS1	no	560	520	560	0.313
chimera_m433432/1175/CCS|F;size=1_and_m177596/1474/CCS|F;size=1_at_679_ITS2_reversed_no_1848	m433432/1175/CCS|F;size=1	m177596/1474/CCS|F;size=1	679	ITS2	no	679	1000	597	0.679
chimera_m84096/456/CCS|F;size=1_and_m91545/1326/CCS|F;size=1_at_146_ITS1_reversed_no_1849	m84096/456/CCS|F;size=1	m91545/1326/CCS|F;size=1	146	ITS1	no	450	456	450	0.32
chimera_m288137/1002/CCS|F;size=1_and_m152899/1270/CCS|F;size=1_at_449_ITS2_reversed_no_1850	m288137/1002/CCS|F;size=1	m152899/1270/CCS|F;size=1	449	ITS2	no	502	513	502	0.875
chimera_m132121/696/CCS|F;size=1_and_m318472/1000/CCS|F;size=1_at_308_ITS2_reversed_no_1851	m132121/696/CCS|F;size=1	m318472/1000/CCS|F;size=1	308	ITS2	no	911	589	911	0.523
chimera_m119792/500/CCS|F;size=1_and_m121005/931/CCS|F;size=1_at_368_ITS2_reversed_no_1852	m119792/500/CCS|F;size=1	m121005/931/CCS|F;size=1	368	ITS2	no	520	500	520	0.736
chimera_m24045/914/CCS|F;size=1_and_m150855/407/CCS|F;size=1_at_367_ITS2_reversed_no_1853	m24045/914/CCS|F;size=1	m150855/407/CCS|F;size=1	367	ITS2	no	407	449	407	0.817
chimera_m126154/456/CCS|F;size=1_and_m143584/1093/CCS|F;size=1_at_52_ITS1_reversed_no_1854	m126154/456/CCS|F;size=1	m143584/1093/CCS|F;size=1	52	ITS1	no	521	456	521	0.114
chimera_m352335/818/CCS|F;size=1_and_m297167/1319/CCS|F;size=1_at_291_ITS2_reversed_no_1855	m352335/818/CCS|F;size=1	m297167/1319/CCS|F;size=1	291	ITS2	no	630	430	630	0.677
chimera_m210043/926/CCS|F;size=2_and_m20194/1129/CCS|F;size=1_at_116_ITS1_reversed_no_1856	m210043/926/CCS|F;size=2	m20194/1129/CCS|F;size=1	116	ITS1	no	663	485	663	0.239
chimera_m195863/611/CCS|F;size=1_and_m311632/1125/CCS|F;size=1_at_125_ITS1_reversed_no_1857	m195863/611/CCS|F;size=1	m311632/1125/CCS|F;size=1	125	ITS1	no	729	490	729	0.255
chimera_m267751/803/CCS|F;size=1_and_m264948/471/CCS|F;size=1_at_355_ITS2_reversed_no_1858	m267751/803/CCS|F;size=1	m264948/471/CCS|F;size=1	355	ITS2	no	432	553	432	0.642
chimera_m330076/1306/CCS|F;size=1_and_m225752/680/CCS|F;size=1_at_664_ITS2_reversed_no_1859	m330076/1306/CCS|F;size=1	m225752/680/CCS|F;size=1	664	ITS2	no	664	1012	566	0.656
chimera_m150743/1180/CCS|F;size=3_and_m435752/1094/CCS|F;size=1_at_157_ITS1_reversed_no_1860	m150743/1180/CCS|F;size=3	m435752/1094/CCS|F;size=1	157	ITS1	no	737	590	737	0.266
chimera_m231007/760/CCS|F;size=1_and_m333047/1157/CCS|F;size=1_at_359_ITS2_reversed_no_1861	m231007/760/CCS|F;size=1	m333047/1157/CCS|F;size=1	359	ITS2	no	697	506	697	0.709
chimera_m12751/493/CCS|F;size=1_and_m117285/1134/CCS|F;size=1_at_287_ITS2_reversed_no_1862	m12751/493/CCS|F;size=1	m117285/1134/CCS|F;size=1	287	ITS2	no	403	493	403	0.582
chimera_m230728/729/CCS|F;size=1_and_m249376/869/CCS|F;size=1_at_543_ITS2_reversed_no_1863	m230728/729/CCS|F;size=1	m249376/869/CCS|F;size=1	543	ITS2	no	568	673	568	0.807
chimera_m191693/1174/CCS|F;size=1_and_m13739/1379/CCS|F;size=2_at_316_ITS2_reversed_no_1864	m191693/1174/CCS|F;size=1	m13739/1379/CCS|F;size=2	316	ITS2	no	457	527	457	0.6
chimera_m283470/441/CCS|F;size=1_and_m211586/584/CCS|F;size=1_at_83_ITS1_reversed_no_1865	m283470/441/CCS|F;size=1	m211586/584/CCS|F;size=1	83	ITS1	no	456	441	456	0.188
chimera_m457448/742/CCS|F;size=1_and_m84498/671/CCS|F;size=1_at_315_ITS2_reversed_no_1866	m457448/742/CCS|F;size=1	m84498/671/CCS|F;size=1	315	ITS2	no	671	642	671	0.491
chimera_m106681/561/CCS|F;size=1_and_m177765/777/CCS|F;size=1_at_117_ITS1_reversed_no_1867	m106681/561/CCS|F;size=1	m177765/777/CCS|F;size=1	117	ITS1	no	470	404	470	0.29
chimera_m797/1744/CCS|F;size=104_and_m119726/389/CCS|F;size=1_at_323_ITS2_reversed_no_1868	m797/1744/CCS|F;size=104	m119726/389/CCS|F;size=1	323	ITS2	no	389	595	389	0.543
chimera_m117099/950/CCS|F;size=1_and_m164992/1205/CCS|F;size=1_at_449_ITS2_reversed_no_1869	m117099/950/CCS|F;size=1	m164992/1205/CCS|F;size=1	449	ITS2	no	608	524	608	0.857
chimera_m34722/575/CCS|F;size=1_and_m102979/581/CCS|F;size=1_at_346_ITS2_reversed_yes_1870	m34722/575/CCS|F;size=1	m102979/581/CCS|F;size=1	346	ITS2	yes	432	461	432	0.751
chimera_m309676/1293/CCS|F;size=1_and_m207754/341/CCS|F;size=1_at_388_ITS2_reversed_yes_1871	m309676/1293/CCS|F;size=1	m207754/341/CCS|F;size=1	388	ITS2	yes	388	592	341	0.655
chimera_m304650/1273/CCS|F;size=1_and_m86816/929/CCS|F;size=1_at_153_ITS1_reversed_no_1872	m304650/1273/CCS|F;size=1	m86816/929/CCS|F;size=1	153	ITS1	no	568	711	568	0.215
chimera_m37198/982/CCS|F;size=1_and_m230108/1378/CCS|F;size=1_at_300_ITS2_reversed_no_1873	m37198/982/CCS|F;size=1	m230108/1378/CCS|F;size=1	300	ITS2	no	511	453	511	0.662
chimera_m197682/393/CCS|F;size=1_and_m251773/1038/CCS|F;size=1_at_44_ITS1_reversed_no_1874	m197682/393/CCS|F;size=1	m251773/1038/CCS|F;size=1	44	ITS1	no	518	393	518	0.112
chimera_m265953/1280/CCS|F;size=1_and_m224826/935/CCS|F;size=1_at_373_ITS2_reversed_no_1875	m265953/1280/CCS|F;size=1	m224826/935/CCS|F;size=1	373	ITS2	no	506	518	506	0.72
chimera_m38442/806/CCS|F;size=1_and_m194434/1424/CCS|F;size=1_at_185_ITS1_reversed_no_1876	m38442/806/CCS|F;size=1	m194434/1424/CCS|F;size=1	185	ITS1	no	566	573	566	0.323
chimera_m404530/888/CCS|F;size=1_and_m70549/980/CCS|F;size=1_at_134_ITS1_reversed_no_1877	m404530/888/CCS|F;size=1	m70549/980/CCS|F;size=1	134	ITS1	no	456	740	456	0.181
chimera_m354726/331/CCS|F;size=1_and_m267839/1473/CCS|F;size=1_at_190_ITS2_reversed_no_1878	m354726/331/CCS|F;size=1	m267839/1473/CCS|F;size=1	190	ITS2	no	488	331	488	0.574
chimera_m137278/1101/CCS|F;size=1_and_m115940/826/CCS|F;size=1_at_128_ITS1_reversed_no_1879	m137278/1101/CCS|F;size=1	m115940/826/CCS|F;size=1	128	ITS1	no	412	570	412	0.225
chimera_m36980/1110/CCS|F;size=2_and_m188839/1208/CCS|F;size=1_at_216_ITS1_reversed_no_1880	m36980/1110/CCS|F;size=2	m188839/1208/CCS|F;size=1	216	ITS1	no	561	800	561	0.27
chimera_m217102/1284/CCS|F;size=2_and_m171069/544/CCS|F;size=1_at_332_ITS2_reversed_no_1881	m217102/1284/CCS|F;size=2	m171069/544/CCS|F;size=1	332	ITS2	no	459	520	459	0.638
chimera_m40451/1445/CCS|F;size=1_and_m236807/1550/CCS|F;size=1_at_128_ITS1_reversed_yes_1882	m40451/1445/CCS|F;size=1	m236807/1550/CCS|F;size=1	128	ITS1	yes	624	401	624	0.319
chimera_m204678/799/CCS|F;size=1_and_m368502/414/CCS|F;size=1_at_87_ITS1_reversed_no_1883	m204678/799/CCS|F;size=1	m368502/414/CCS|F;size=1	87	ITS1	no	414	485	414	0.179
chimera_m53107/1215/CCS|F;size=1_and_m112383/820/CCS|F;size=1_at_292_ITS2_reversed_no_1884	m53107/1215/CCS|F;size=1	m112383/820/CCS|F;size=1	292	ITS2	no	738	538	738	0.543
chimera_m210808/1051/CCS|F;size=1_and_m185980/1451/CCS|F;size=1_at_57_ITS1_reversed_no_1885	m210808/1051/CCS|F;size=1	m185980/1451/CCS|F;size=1	57	ITS1	no	614	405	614	0.141
chimera_m149016/849/CCS|F;size=1_and_m121321/896/CCS|F;size=1_at_416_ITS2_reversed_yes_1886	m149016/849/CCS|F;size=1	m121321/896/CCS|F;size=1	416	ITS2	yes	524	547	524	0.761
chimera_m207271/1115/CCS|F;size=3_and_m261109/560/CCS|F;size=1_at_327_ITS2_reversed_no_1887	m207271/1115/CCS|F;size=3	m261109/560/CCS|F;size=1	327	ITS2	no	372	431	372	0.759
chimera_m187865/1231/CCS|F;size=1_and_m437272/492/CCS|F;size=1_at_327_ITS2_reversed_no_1888	m187865/1231/CCS|F;size=1	m437272/492/CCS|F;size=1	327	ITS2	no	391	611	391	0.535
chimera_m267954/615/CCS|F;size=1_and_m290190/904/CCS|F;size=1_at_65_ITS1_reversed_no_1889	m267954/615/CCS|F;size=1	m290190/904/CCS|F;size=1	65	ITS1	no	582	465	582	0.14
chimera_m134492/1063/CCS|F;size=2_and_m104355/2007/CCS|F;size=1_at_309_ITS2_reversed_no_1890	m134492/1063/CCS|F;size=2	m104355/2007/CCS|F;size=1	309	ITS2	no	506	418	506	0.739
chimera_m95833/987/CCS|F;size=2_and_m251593/1030/CCS|F;size=1_at_127_ITS1_reversed_yes_1891	m95833/987/CCS|F;size=2	m251593/1030/CCS|F;size=1	127	ITS1	yes	631	608	631	0.209
chimera_m140371/707/CCS|T;size=1_and_m241327/696/CCS|F;size=1_at_129_ITS1_reversed_no_1892	m140371/707/CCS|T;size=1	m241327/696/CCS|F;size=1	129	ITS1	no	507	429	507	0.301
chimera_m441488/847/CCS|F;size=1_and_m107852/960/CCS|F;size=1_at_444_ITS2_reversed_no_1893	m441488/847/CCS|F;size=1	m107852/960/CCS|F;size=1	444	ITS2	no	444	530	354	0.838
chimera_m99223/660/CCS|F;size=1_and_m238817/1715/CCS|F;size=1_at_324_ITS2_reversed_no_1894	m99223/660/CCS|F;size=1	m238817/1715/CCS|F;size=1	324	ITS2	no	604	502	604	0.645
chimera_m90860/1251/CCS|F;size=1_and_m121007/888/CCS|F;size=2_at_148_ITS1_reversed_no_1895	m90860/1251/CCS|F;size=1	m121007/888/CCS|F;size=2	148	ITS1	no	590	581	590	0.255
chimera_m103024/863/CCS|F;size=1_and_m103029/1527/CCS|F;size=1_at_157_ITS1_reversed_no_1896	m103024/863/CCS|F;size=1	m103029/1527/CCS|F;size=1	157	ITS1	no	419	506	419	0.31
chimera_m170062/1262/CCS|F;size=1_and_m415427/1145/CCS|F;size=1_at_340_ITS2_reversed_no_1897	m170062/1262/CCS|F;size=1	m415427/1145/CCS|F;size=1	340	ITS2	no	579	586	579	0.58
chimera_m167379/546/CCS|F;size=1_and_m119005/597/CCS|F;size=1_at_185_ITS1_reversed_no_1898	m167379/546/CCS|F;size=1	m119005/597/CCS|F;size=1	185	ITS1	no	481	546	481	0.339
chimera_m140452/1269/CCS|F;size=1_and_m129260/675/CCS|F;size=1_at_143_ITS1_reversed_no_1899	m140452/1269/CCS|F;size=1	m129260/675/CCS|F;size=1	143	ITS1	no	445	659	445	0.217
chimera_m266406/1463/CCS|F;size=1_and_m74083/969/CCS|F;size=1_at_167_ITS1_reversed_no_1900	m266406/1463/CCS|F;size=1	m74083/969/CCS|F;size=1	167	ITS1	no	567	509	567	0.328
chimera_m18054/875/CCS|F;size=1_and_m94084/758/CCS|F;size=1_at_129_ITS1_reversed_no_1901	m18054/875/CCS|F;size=1	m94084/758/CCS|F;size=1	129	ITS1	no	491	425	491	0.304
chimera_m207166/944/CCS|F;size=1_and_m12528/1277/CCS|F;size=1_at_451_ITS2_reversed_no_1902	m207166/944/CCS|F;size=1	m12528/1277/CCS|F;size=1	451	ITS2	no	451	624	351	0.723
chimera_m156062/413/CCS|F;size=1_and_m225365/380/CCS|F;size=1_at_256_ITS2_reversed_no_1903	m156062/413/CCS|F;size=1	m225365/380/CCS|F;size=1	256	ITS2	no	380	413	380	0.62
chimera_m96026/1388/CCS|F;size=1_and_m11550/1562/CCS|F;size=1_at_639_ITS2_reversed_no_1904	m96026/1388/CCS|F;size=1	m11550/1562/CCS|F;size=1	639	ITS2	no	639	711	494	0.899
chimera_m270559/1594/CCS|F;size=1_and_m173/1246/CCS|F;size=3_at_60_ITS1_reversed_no_1905	m270559/1594/CCS|F;size=1	m173/1246/CCS|F;size=3	60	ITS1	no	532	599	532	0.1
chimera_m105232/1316/CCS|F;size=1_and_m214987/873/CCS|F;size=2_at_190_ITS1_reversed_no_1906	m105232/1316/CCS|F;size=1	m214987/873/CCS|F;size=2	190	ITS1	no	475	682	475	0.279
chimera_m289942/1394/CCS|F;size=1_and_m213508/853/CCS|F;size=1_at_25_ITS1_reversed_no_1907	m289942/1394/CCS|F;size=1	m213508/853/CCS|F;size=1	25	ITS1	no	491	441	491	0.057
chimera_m110037/1360/CCS|F;size=1_and_m176642/1267/CCS|F;size=1_at_166_ITS1_reversed_no_1908	m110037/1360/CCS|F;size=1	m176642/1267/CCS|F;size=1	166	ITS1	no	530	764	530	0.217
chimera_m40543/1747/CCS|F;size=1_and_m28868/582/CCS|F;size=1_at_127_ITS1_reversed_no_1909	m40543/1747/CCS|F;size=1	m28868/582/CCS|F;size=1	127	ITS1	no	448	429	448	0.296
chimera_m432189/1518/CCS|F;size=1_and_m32536/863/CCS|F;size=1_at_482_ITS2_reversed_no_1910	m432189/1518/CCS|F;size=1	m32536/863/CCS|F;size=1	482	ITS2	no	551	642	551	0.751
chimera_m36089/1314/CCS|F;size=1_and_m230141/1377/CCS|F;size=1_at_328_ITS2_reversed_yes_1911	m36089/1314/CCS|F;size=1	m230141/1377/CCS|F;size=1	328	ITS2	yes	577	560	577	0.586
chimera_m216633/565/CCS|F;size=1_and_m235574/858/CCS|F;size=1_at_130_ITS1_reversed_no_1912	m216633/565/CCS|F;size=1	m235574/858/CCS|F;size=1	130	ITS1	no	535	524	535	0.248
chimera_m128910/831/CCS|T;size=1_and_m55/759/CCS|F;size=2_at_17_ITS1_reversed_yes_1913	m128910/831/CCS|T;size=1	m55/759/CCS|F;size=2	17	ITS1	yes	409	365	409	0.047
chimera_m18490/756/CCS|F;size=1_and_m48218/805/CCS|F;size=1_at_168_ITS1_reversed_no_1914	m18490/756/CCS|F;size=1	m48218/805/CCS|F;size=1	168	ITS1	no	619	495	619	0.339
chimera_m134832/1118/CCS|F;size=1_and_m246941/667/CCS|F;size=1_at_388_ITS2_reversed_no_1915	m134832/1118/CCS|F;size=1	m246941/667/CCS|F;size=1	388	ITS2	no	667	620	667	0.626
chimera_m96200/1161/CCS|F;size=1_and_m113221/654/CCS|F;size=1_at_134_ITS1_reversed_no_1916	m96200/1161/CCS|F;size=1	m113221/654/CCS|F;size=1	134	ITS1	no	541	441	541	0.304
chimera_m104181/1037/CCS|F;size=1_and_m134752/753/CCS|F;size=2_at_303_ITS2_reversed_no_1917	m104181/1037/CCS|F;size=1	m134752/753/CCS|F;size=2	303	ITS2	no	446	451	446	0.672
chimera_m273696/412/CCS|F;size=1_and_m223689/1107/CCS|F;size=1_at_350_ITS2_reversed_yes_1918	m273696/412/CCS|F;size=1	m223689/1107/CCS|F;size=1	350	ITS2	yes	572	412	572	0.85
chimera_m87141/1087/CCS|F;size=1_and_m112104/1478/CCS|F;size=1_at_348_ITS2_reversed_no_1919	m87141/1087/CCS|F;size=1	m112104/1478/CCS|F;size=1	348	ITS2	no	563	494	563	0.704
chimera_m48946/1031/CCS|F;size=1_and_m208436/997/CCS|F;size=1_at_335_ITS2_reversed_no_1920	m48946/1031/CCS|F;size=1	m208436/997/CCS|F;size=1	335	ITS2	no	562	572	562	0.586
chimera_m207412/985/CCS|F;size=1_and_m80824/910/CCS|F;size=1_at_92_ITS1_reversed_no_1921	m207412/985/CCS|F;size=1	m80824/910/CCS|F;size=1	92	ITS1	no	646	411	646	0.224
chimera_m126735/1296/CCS|F;size=1_and_m273529/1177/CCS|F;size=1_at_109_ITS1_reversed_no_1922	m126735/1296/CCS|F;size=1	m273529/1177/CCS|F;size=1	109	ITS1	no	685	587	685	0.186
chimera_m360741/636/CCS|F;size=1_and_m222345/1952/CCS|F;size=1_at_130_ITS1_reversed_no_1923	m360741/636/CCS|F;size=1	m222345/1952/CCS|F;size=1	130	ITS1	no	627	462	627	0.281
chimera_m467880/1937/CCS|F;size=1_and_m16760/1111/CCS|F;size=1_at_224_ITS1_reversed_no_1924	m467880/1937/CCS|F;size=1	m16760/1111/CCS|F;size=1	224	ITS1	no	586	847	586	0.264
chimera_m22878/1413/CCS|F;size=1_and_m41923/964/CCS|T;size=1_at_30_ITS1_reversed_no_1925	m22878/1413/CCS|F;size=1	m41923/964/CCS|T;size=1	30	ITS1	no	389	530	389	0.057
chimera_m109869/631/CCS|F;size=1_and_m117229/892/CCS|F;size=1_at_120_ITS1_reversed_no_1926	m109869/631/CCS|F;size=1	m117229/892/CCS|F;size=1	120	ITS1	no	455	493	455	0.243
chimera_m101583/755/CCS|F;size=1_and_m148307/1373/CCS|F;size=1_at_483_ITS2_reversed_no_1927	m101583/755/CCS|F;size=1	m148307/1373/CCS|F;size=1	483	ITS2	no	572	697	572	0.693
chimera_m97621/1250/CCS|F;size=1_and_m128776/471/CCS|F;size=1_at_316_ITS2_reversed_no_1928	m97621/1250/CCS|F;size=1	m128776/471/CCS|F;size=1	316	ITS2	no	471	572	471	0.552
chimera_m240284/1033/CCS|F;size=1_and_m101662/614/CCS|F;size=1_at_398_ITS2_reversed_no_1929	m240284/1033/CCS|F;size=1	m101662/614/CCS|F;size=1	398	ITS2	no	614	566	614	0.703
chimera_m495396/667/CCS|F;size=1_and_m302771/980/CCS|F;size=1_at_217_5.8S_reversed_no_1930	m495396/667/CCS|F;size=1	m302771/980/CCS|F;size=1	217	5.8S	no	579	534	579	0.406
chimera_m51954/750/CCS|F;size=1_and_m226662/936/CCS|F;size=1_at_266_5.8S_reversed_no_1931	m51954/750/CCS|F;size=1	m226662/936/CCS|F;size=1	266	5.8S	no	372	652	372	0.408
chimera_m348783/673/CCS|F;size=1_and_m37693/665/CCS|F;size=1_at_151_ITS1_reversed_no_1932	m348783/673/CCS|F;size=1	m37693/665/CCS|F;size=1	151	ITS1	no	428	673	428	0.224
chimera_m227900/894/CCS|F;size=1_and_m110096/710/CCS|F;size=1_at_330_ITS2_reversed_no_1933	m227900/894/CCS|F;size=1	m110096/710/CCS|F;size=1	330	ITS2	no	433	543	433	0.608
chimera_m56142/481/CCS|F;size=1_and_m293273/543/CCS|F;size=1_at_277_ITS2_reversed_no_1934	m56142/481/CCS|F;size=1	m293273/543/CCS|F;size=1	277	ITS2	no	543	481	543	0.576
chimera_m248010/1432/CCS|F;size=2_and_m207583/784/CCS|F;size=2_at_294_ITS2_reversed_no_1935	m248010/1432/CCS|F;size=2	m207583/784/CCS|F;size=2	294	ITS2	no	532	471	532	0.624
chimera_m216555/959/CCS|F;size=1_and_m259223/780/CCS|F;size=1_at_52_ITS1_reversed_no_1936	m216555/959/CCS|F;size=1	m259223/780/CCS|F;size=1	52	ITS1	no	619	530	619	0.098
chimera_m110856/1621/CCS|F;size=1_and_m279128/566/CCS|F;size=1_at_115_ITS1_reversed_no_1937	m110856/1621/CCS|F;size=1	m279128/566/CCS|F;size=1	115	ITS1	no	566	521	566	0.221
chimera_m246928/1488/CCS|F;size=1_and_m40938/625/CCS|F;size=1_at_292_ITS2_reversed_no_1938	m246928/1488/CCS|F;size=1	m40938/625/CCS|F;size=1	292	ITS2	no	511	457	511	0.639
chimera_m78942/867/CCS|F;size=1_and_m414806/722/CCS|F;size=1_at_36_ITS1_reversed_no_1939	m78942/867/CCS|F;size=1	m414806/722/CCS|F;size=1	36	ITS1	no	609	426	609	0.085
chimera_m15419/1131/CCS|F;size=1_and_m118296/989/CCS|F;size=1_at_320_ITS2_reversed_no_1940	m15419/1131/CCS|F;size=1	m118296/989/CCS|F;size=1	320	ITS2	no	652	480	652	0.667
chimera_m110837/569/CCS|F;size=2_and_m339371/1641/CCS|F;size=1_at_262_ITS2_reversed_no_1941	m110837/569/CCS|F;size=2	m339371/1641/CCS|F;size=1	262	ITS2	no	554	446	554	0.587
chimera_m16798/1756/CCS|F;size=1_and_m90270/543/CCS|F;size=1_at_79_ITS1_reversed_no_1942	m16798/1756/CCS|F;size=1	m90270/543/CCS|F;size=1	79	ITS1	no	543	496	543	0.159
chimera_m302258/1416/CCS|F;size=1_and_m21691/1187/CCS|F;size=1_at_341_ITS2_reversed_no_1943	m302258/1416/CCS|F;size=1	m21691/1187/CCS|F;size=1	341	ITS2	no	624	561	624	0.608
chimera_m297651/1027/CCS|F;size=1_and_m68718/648/CCS|F;size=1_at_143_ITS1_reversed_no_1944	m297651/1027/CCS|F;size=1	m68718/648/CCS|F;size=1	143	ITS1	no	447	515	447	0.278
chimera_m25330/654/CCS|F;size=1_and_m208582/659/CCS|F;size=1_at_317_ITS2_reversed_yes_1945	m25330/654/CCS|F;size=1	m208582/659/CCS|F;size=1	317	ITS2	yes	541	491	541	0.646
chimera_m252893/967/CCS|F;size=1_and_m214946/1408/CCS|F;size=1_at_108_ITS1_reversed_no_1946	m252893/967/CCS|F;size=1	m214946/1408/CCS|F;size=1	108	ITS1	no	528	399	528	0.271
chimera_m282966/833/CCS|F;size=1_and_m47942/1425/CCS|F;size=1_at_297_ITS2_reversed_no_1947	m282966/833/CCS|F;size=1	m47942/1425/CCS|F;size=1	297	ITS2	no	631	428	631	0.694
chimera_m342291/953/CCS|F;size=1_and_m11374/883/CCS|F;size=1_at_432_ITS2_reversed_no_1948	m342291/953/CCS|F;size=1	m11374/883/CCS|F;size=1	432	ITS2	no	883	609	883	0.709
chimera_m115883/547/CCS|F;size=1_and_m157255/567/CCS|F;size=1_at_345_ITS2_reversed_no_1949	m115883/547/CCS|F;size=1	m157255/567/CCS|F;size=1	345	ITS2	no	430	547	430	0.631
chimera_m140319/851/CCS|F;size=2_and_m24317/1541/CCS|F;size=1_at_296_ITS2_reversed_no_1950	m140319/851/CCS|F;size=2	m24317/1541/CCS|F;size=1	296	ITS2	no	634	426	634	0.695
chimera_m215691/1386/CCS|F;size=1_and_m127985/771/CCS|F;size=1_at_402_ITS2_reversed_no_1951	m215691/1386/CCS|F;size=1	m127985/771/CCS|F;size=1	402	ITS2	no	650	618	650	0.65
chimera_m253569/663/CCS|F;size=1_and_m123963/1559/CCS|F;size=1_at_342_ITS2_reversed_yes_1952	m253569/663/CCS|F;size=1	m123963/1559/CCS|F;size=1	342	ITS2	yes	683	551	683	0.621
chimera_m25908/1001/CCS|F;size=1_and_m226160/1482/CCS|F;size=1_at_296_ITS2_reversed_no_1953	m25908/1001/CCS|F;size=1	m226160/1482/CCS|F;size=1	296	ITS2	no	588	480	588	0.617
chimera_m306410/1465/CCS|F;size=1_and_m289237/1320/CCS|F;size=1_at_383_ITS2_reversed_no_1954	m306410/1465/CCS|F;size=1	m289237/1320/CCS|F;size=1	383	ITS2	no	604	502	604	0.763
chimera_m75008/1106/CCS|F;size=1_and_m15568/1265/CCS|F;size=1_at_139_ITS1_reversed_yes_1955	m75008/1106/CCS|F;size=1	m15568/1265/CCS|F;size=1	139	ITS1	yes	545	464	545	0.3
chimera_m76589/376/CCS|F;size=1_and_m34347/418/CCS|F;size=1_at_196_ITS2_reversed_no_1956	m76589/376/CCS|F;size=1	m34347/418/CCS|F;size=1	196	ITS2	no	418	376	418	0.521
chimera_m384888/794/CCS|F;size=1_and_m110096/710/CCS|F;size=1_at_157_ITS1_reversed_no_1957	m384888/794/CCS|F;size=1	m110096/710/CCS|F;size=1	157	ITS1	no	433	521	433	0.301
chimera_m309929/742/CCS|F;size=1_and_m120738/705/CCS|F;size=1_at_399_ITS2_reversed_no_1958	m309929/742/CCS|F;size=1	m120738/705/CCS|F;size=1	399	ITS2	no	574	653	574	0.611
chimera_m40875/884/CCS|F;size=1_and_m29796/1352/CCS|F;size=1_at_169_ITS1_reversed_no_1959	m40875/884/CCS|F;size=1	m29796/1352/CCS|F;size=1	169	ITS1	no	430	608	430	0.278
chimera_m289887/850/CCS|F;size=1_and_m221183/1369/CCS|F;size=1_at_313_ITS2_reversed_no_1960	m289887/850/CCS|F;size=1	m221183/1369/CCS|F;size=1	313	ITS2	no	547	602	547	0.52
chimera_m6758/611/CCS|F;size=1_and_m109350/558/CCS|F;size=1_at_76_ITS1_reversed_no_1961	m6758/611/CCS|F;size=1	m109350/558/CCS|F;size=1	76	ITS1	no	558	544	558	0.14
chimera_m222042/1300/CCS|F;size=1_and_m34265/692/CCS|F;size=1_at_381_ITS2_reversed_no_1962	m222042/1300/CCS|F;size=1	m34265/692/CCS|F;size=1	381	ITS2	no	450	539	450	0.707
chimera_m20630/800/CCS|F;size=1_and_m265382/1675/CCS|F;size=1_at_326_ITS2_reversed_no_1963	m20630/800/CCS|F;size=1	m265382/1675/CCS|F;size=1	326	ITS2	no	575	497	575	0.656
chimera_m209405/856/CCS|F;size=1_and_m263315/1105/CCS|F;size=1_at_110_ITS1_reversed_no_1964	m209405/856/CCS|F;size=1	m263315/1105/CCS|F;size=1	110	ITS1	no	557	438	557	0.251
chimera_m268756/801/CCS|F;size=1_and_m190966/989/CCS|F;size=1_at_369_ITS2_reversed_no_1965	m268756/801/CCS|F;size=1	m190966/989/CCS|F;size=1	369	ITS2	no	574	539	574	0.685
chimera_m188405/620/CCS|F;size=1_and_m18448/1663/CCS|F;size=1_at_288_ITS2_reversed_no_1966	m188405/620/CCS|F;size=1	m18448/1663/CCS|F;size=1	288	ITS2	no	487	464	487	0.621
chimera_m142888/836/CCS|F;size=1_and_m87171/1143/CCS|F;size=1_at_223_ITS2_reversed_no_1967	m142888/836/CCS|F;size=1	m87171/1143/CCS|F;size=1	223	ITS2	no	533	422	533	0.528
chimera_m45692/1229/CCS|F;size=1_and_m207432/942/CCS|F;size=1_at_227_ITS2_reversed_no_1968	m45692/1229/CCS|F;size=1	m207432/942/CCS|F;size=1	227	ITS2	no	433	435	433	0.522
chimera_m75762/658/CCS|F;size=1_and_m281062/543/CCS|F;size=1_at_62_ITS1_reversed_no_1969	m75762/658/CCS|F;size=1	m281062/543/CCS|F;size=1	62	ITS1	no	474	410	474	0.151
chimera_m298441/590/CCS|F;size=1_and_m238446/1654/CCS|F;size=1_at_378_ITS2_reversed_no_1970	m298441/590/CCS|F;size=1	m238446/1654/CCS|F;size=1	378	ITS2	no	670	590	670	0.641
chimera_m295335/794/CCS|F;size=1_and_m309607/1466/CCS|F;size=1_at_451_ITS2_reversed_no_1971	m295335/794/CCS|F;size=1	m309607/1466/CCS|F;size=1	451	ITS2	no	631	615	631	0.733
chimera_m49046/1022/CCS|F;size=1_and_m218899/581/CCS|F;size=1_at_379_ITS2_reversed_no_1972	m49046/1022/CCS|F;size=1	m218899/581/CCS|F;size=1	379	ITS2	no	581	557	581	0.68
chimera_m20234/399/CCS|F;size=1_and_m182388/760/CCS|F;size=1_at_112_ITS1_reversed_no_1973	m20234/399/CCS|F;size=1	m182388/760/CCS|F;size=1	112	ITS1	no	550	399	550	0.281
chimera_m185798/1024/CCS|F;size=1_and_m80367/341/CCS|F;size=1_at_372_ITS2_reversed_no_1974	m185798/1024/CCS|F;size=1	m80367/341/CCS|F;size=1	372	ITS2	no	372	522	341	0.713
chimera_m31567/984/CCS|F;size=1_and_m140814/832/CCS|F;size=2_at_223_5.8S_reversed_no_1975	m31567/984/CCS|F;size=1	m140814/832/CCS|F;size=2	223	5.8S	no	482	501	482	0.445
chimera_m148377/776/CCS|F;size=1_and_m129111/396/CCS|F;size=1_at_205_5.8S_reversed_no_1976	m148377/776/CCS|F;size=1	m129111/396/CCS|F;size=1	205	5.8S	no	396	475	396	0.432
chimera_m78888/742/CCS|F;size=1_and_m250744/1058/CCS|F;size=1_at_347_ITS2_reversed_no_1977	m78888/742/CCS|F;size=1	m250744/1058/CCS|F;size=1	347	ITS2	no	527	454	527	0.764
chimera_m167491/1442/CCS|F;size=1_and_m139600/1390/CCS|F;size=1_at_411_ITS2_reversed_no_1978	m167491/1442/CCS|F;size=1	m139600/1390/CCS|F;size=1	411	ITS2	no	829	586	829	0.701
chimera_m224717/1132/CCS|F;size=1_and_m437927/664/CCS|F;size=1_at_384_ITS2_reversed_no_1979	m224717/1132/CCS|F;size=1	m437927/664/CCS|F;size=1	384	ITS2	no	475	521	475	0.737
chimera_m219488/1206/CCS|F;size=1_and_m695/370/CCS|F;size=1_at_232_5.8S_reversed_no_1980	m219488/1206/CCS|F;size=1	m695/370/CCS|F;size=1	232	5.8S	no	370	535	370	0.434
chimera_m208543/1313/CCS|F;size=1_and_m48017/882/CCS|F;size=2_at_331_ITS2_reversed_yes_1981	m208543/1313/CCS|F;size=1	m48017/882/CCS|F;size=2	331	ITS2	yes	532	470	532	0.704
chimera_m26671/929/CCS|F;size=1_and_m286741/707/CCS|F;size=1_at_365_ITS2_reversed_yes_1982	m26671/929/CCS|F;size=1	m286741/707/CCS|F;size=1	365	ITS2	yes	517	545	517	0.67
chimera_m77791/465/CCS|F;size=1_and_m60656/650/CCS|F;size=1_at_320_ITS2_reversed_no_1983	m77791/465/CCS|F;size=1	m60656/650/CCS|F;size=1	320	ITS2	no	545	465	545	0.688
chimera_m151991/863/CCS|F;size=2_and_m453648/638/CCS|F;size=1_at_34_ITS1_reversed_no_1984	m151991/863/CCS|F;size=2	m453648/638/CCS|F;size=1	34	ITS1	no	638	505	638	0.067
chimera_m245871/1128/CCS|F;size=1_and_m147156/1371/CCS|F;size=2_at_329_ITS2_reversed_no_1985	m245871/1128/CCS|F;size=1	m147156/1371/CCS|F;size=2	329	ITS2	no	478	505	478	0.651
chimera_m358671/1090/CCS|F;size=1_and_m45919/1637/CCS|F;size=1_at_102_ITS1_reversed_no_1986	m358671/1090/CCS|F;size=1	m45919/1637/CCS|F;size=1	102	ITS1	no	528	424	528	0.241
chimera_m107210/868/CCS|F;size=1_and_m28722/629/CCS|F;size=1_at_451_ITS2_reversed_no_1987	m107210/868/CCS|F;size=1	m28722/629/CCS|F;size=1	451	ITS2	no	523	622	523	0.725
chimera_m127717/567/CCS|F;size=1_and_m259643/452/CCS|F;size=1_at_72_ITS1_reversed_no_1988	m127717/567/CCS|F;size=1	m259643/452/CCS|F;size=1	72	ITS1	no	452	567	452	0.127
chimera_m7986/1393/CCS|F;size=2_and_m126488/863/CCS|F;size=1_at_346_ITS2_reversed_no_1989	m7986/1393/CCS|F;size=2	m126488/863/CCS|F;size=1	346	ITS2	no	554	420	554	0.824
chimera_m119543/872/CCS|F;size=1_and_m15517/991/CCS|F;size=1_at_213_ITS1_reversed_no_1990	m119543/872/CCS|F;size=1	m15517/991/CCS|F;size=1	213	ITS1	no	480	648	480	0.329
chimera_m127398/457/CCS|F;size=1_and_m107546/646/CCS|F;size=1_at_220_ITS2_reversed_no_1991	m127398/457/CCS|F;size=1	m107546/646/CCS|F;size=1	220	ITS2	no	502	457	502	0.481
chimera_m61673/1148/CCS|F;size=1_and_m69932/829/CCS|F;size=1_at_403_ITS2_reversed_no_1992	m61673/1148/CCS|F;size=1	m69932/829/CCS|F;size=1	403	ITS2	no	614	647	614	0.623
chimera_m262380/376/CCS|F;size=1_and_m254876/1471/CCS|F;size=1_at_115_ITS1_reversed_yes_1993	m262380/376/CCS|F;size=1	m254876/1471/CCS|F;size=1	115	ITS1	yes	596	376	596	0.306
chimera_m75530/1167/CCS|F;size=1_and_m127566/952/CCS|F;size=1_at_171_ITS1_reversed_no_1994	m75530/1167/CCS|F;size=1	m127566/952/CCS|F;size=1	171	ITS1	no	952	609	952	0.281
chimera_m208235/1269/CCS|F;size=1_and_m213478/1946/CCS|F;size=1_at_78_ITS1_reversed_no_1995	m208235/1269/CCS|F;size=1	m213478/1946/CCS|F;size=1	78	ITS1	no	618	676	618	0.115
chimera_m19427/2168/CCS|F;size=1_and_m225530/570/CCS|F;size=1_at_91_ITS1_reversed_no_1996	m19427/2168/CCS|F;size=1	m225530/570/CCS|F;size=1	91	ITS1	no	570	631	570	0.144
chimera_m69107/1065/CCS|F;size=1_and_m192129/685/CCS|F;size=1_at_252_ITS2_reversed_no_1997	m69107/1065/CCS|F;size=1	m192129/685/CCS|F;size=1	252	ITS2	no	594	422	594	0.597
chimera_m91144/1294/CCS|F;size=1_and_m234912/779/CCS|F;size=1_at_110_ITS1_reversed_no_1998	m91144/1294/CCS|F;size=1	m234912/779/CCS|F;size=1	110	ITS1	no	361	453	361	0.243
[truncated: 485 more rows]

## Sheet: README
Table S3. simulated chimeric sequences details. here are the details the generation of 2,484 simulated chimeric ITS reads designed to benchmark chimera detection algorithms. Each entry specifies a unique chimera identifier, the two parental sequence IDs drawn from the EUKARYOME v1.9.2 database, and the corresponding breakpoint positions determined based on ITS-region-specific probabilities. The t…
