# Supplementary material for: Are we throwing away good data? Evaluation of chimera detection algorithms on long-read amplicons reveals high false-positive rates across algorithms
Source: PeerJ. 2025 Dec 5;13:e20456. doi: 10.7717/peerj.20456 (PMC12684403; doi:10.7717/peerj.20456)
Supplement: Supplemental Information 6 — The dataset comprises 2,484 true chimeric sequences; the total number of reads in the dataset was 46,954. The settings were adjusted to find this algorithm’s best combination (highest F1 score). The F1 score is a statistical measure that evaluates the performance of an algorithm by considering both specificity and sensitivity. Initially, each setting’s value was changed, and later, the combination of various settings shifted to achieve better results in our search for the optimal combination. False positives are non-chimeric sequences misidentified as chimeric sequences by the algorithm. This algorithm achieved the best results when settings were set to –abskew 4 –chimeras_diff_pct 0.9 –chimeras_length_min 30 and other settings as default. [file peerj-13-20456-s006.xlsx]

## Sheet: Sheet1
Modified settings	Detected chimeras	True_Positives	False_Positives	True_Negatives	False_Negatives	Sensitivity	Specificity	Precision	F1_Score
--abskew_4_diff_pct_0.9_--chimeras_length_min_30	1590	1447	143	26267	1037	0.58253	0.99459	0.91006	0.71036
--abskew_4_diff_pct_0.9_--chimeras_length_min_20	1601	1449	152	26258	1035	0.58333	0.99424	0.90506	0.70942
--abskew_4_diff_pct_0.9_--chimeras_length_min_40	1570	1435	135	26275	1049	0.5777	0.99489	0.91401	0.70794
--abskew_4_diff_pct_0.9_--chimeras_length_min_10	1610	1449	161	26249	1035	0.58333	0.9939	0.9	0.70787
--abskew_4_--chimeras_diff_pct_0.9	1610	1449	161	26249	1035	0.58333	0.9939	0.9	0.70787
--abskew_4_--chimeras_diff_pct_0.8	1580	1420	160	26250	1064	0.57166	0.99394	0.89873	0.69882
--abskew_4_diff_pct_0.9_--chimeras_parts_5	1614	1421	193	26217	1063	0.57206	0.99269	0.88042	0.69351
--abskew_4_diff_pct_0.9_--chimeras_length_min_50	1511	1384	127	26283	1100	0.55717	0.99519	0.91595	0.69287
--abskew_4_--chimeras_diff_pct_0.7	1551	1388	163	26247	1096	0.55878	0.99383	0.89491	0.68798
--abskew_4_diff_pct_0.9_--chimeras_parts_4	1607	1393	214	26196	1091	0.56079	0.9919	0.86683	0.68101
--abskew_4_diff_pct_0.9_--chimeras_length_min_60	1464	1341	123	26287	1143	0.53986	0.99534	0.91598	0.67933
--abskew_4_--chimeras_diff_pct_0.6	1510	1342	168	26242	1142	0.54026	0.99364	0.88874	0.67201
--abskew_4_diff_pct_0.9_--chimeras_length_min_70	1403	1286	117	26293	1198	0.51771	0.99557	0.91661	0.66169
--abskew_4_--chimeras_diff_pct_0.5	1466	1296	170	26240	1188	0.52174	0.99356	0.88404	0.6562
--abskew_4_diff_pct_0.9_--chimeras_parts_3	1497	1285	212	26198	1199	0.51731	0.99197	0.85838	0.64557
--abskew_4_diff_pct_0.9_--chimeras_length_min_80	1343	1230	113	26297	1254	0.49517	0.99572	0.91586	0.6428
--abskew_4_diff_pct_0.9_--chimeras_length_min_90	1270	1165	105	26305	1319	0.469	0.99602	0.91732	0.62067
--abskew_4_diff_pct_0.9_--chimeras_parts_2	1365	1133	232	26178	1351	0.45612	0.99122	0.83004	0.58872
--abskew_4_--chimeras_length_min_30	1041	913	128	26282	1571	0.36755	0.99515	0.87704	0.51801
--abskew_4_--chimeras_length_min_20	1051	913	138	26272	1571	0.36755	0.99477	0.8687	0.51655
--abskew_4_--chimeras_length_min_10	1062	914	148	26262	1570	0.36795	0.9944	0.86064	0.51551
--abskew_4	1062	914	148	26262	1570	0.36795	0.9944	0.86064	0.51551
--abskew_4_--chimeras_parents_max_3	1062	914	148	26262	1570	0.36795	0.9944	0.86064	0.51551
--abskew_4_--chimeras_parents_max_2	1052	905	147	26263	1579	0.36433	0.99443	0.86027	0.51188
--abskew_4_--chimeras_parts_5	1055	897	158	26252	1587	0.36111	0.99402	0.85024	0.50692
--abskew_5	898	854	44	26366	1630	0.3438	0.99833	0.951	0.50503
--abskew_3	1621	1028	593	25817	1456	0.41385	0.97755	0.63418	0.50085
--abskew_4_--chimeras_parts_4	1062	879	183	26227	1605	0.35386	0.99307	0.82768	0.49577
--abskew_6	849	812	37	26373	1672	0.32689	0.9986	0.95642	0.48725
--abskew_4_--chimeras_parts_3	1018	824	194	26216	1660	0.33172	0.99265	0.80943	0.47059
--abskew_4_--chimeras_parts_2	926	725	201	26209	1759	0.29187	0.99239	0.78294	0.42522
--abskew_2	6210	1141	5069	21341	1343	0.45934	0.80807	0.18374	0.26248
--chimeras_diff_pct_0.9	16516	1738	14778	11632	746	0.69968	0.44044	0.10523	0.18295
--chimeras_length_min_30	10312	1161	9151	17259	1323	0.46739	0.6535	0.11259	0.18146
--chimeras_diff_pct_0.8	16436	1710	14726	11684	774	0.68841	0.44241	0.10404	0.18076
--chimeras_diff_pct_0.7	16313	1679	14634	11776	805	0.67593	0.44589	0.10292	0.17865
--chimeras_diff_pct_0.6	16163	1641	14522	11888	843	0.66063	0.45013	0.10153	0.17601
--chimeras_diff_pct_0.5	16137	1598	14539	11871	886	0.64332	0.44949	0.09903	0.17163
--chimeras_length_min_20	11265	1172	10093	16317	1312	0.47182	0.61783	0.10404	0.17049
--chimeras_parts_5	12212	1196	11016	15394	1288	0.48148	0.58289	0.09794	0.16277
Default settings (--chimeras_length_min_10, --chimeras_parents_max_3, --abskew 1, --chimeras_diff_pct 0 )	12287	1199	11088	15322	1285	0.48269	0.58016	0.09758	0.16235
--chimeras_parents_max_2	11776	1117	10659	15751	1367	0.44968	0.5964	0.09485	0.15666
--chimeras_parts_4	12099	1128	10971	15439	1356	0.45411	0.58459	0.09323	0.1547
--chimeras_parts_3	11894	1035	10859	15551	1449	0.41667	0.58883	0.08702	0.14397
--chimeras_parts_2	11457	895	10562	15848	1589	0.36031	0.60008	0.07812	0.1284
