# Supplementary material for: Are we throwing away good data? Evaluation of chimera detection algorithms on long-read amplicons reveals high false-positive rates across algorithms
Source: PeerJ. 2025 Dec 5;13:e20456. doi: 10.7717/peerj.20456 (PMC12684403; doi:10.7717/peerj.20456)
Supplement: Supplemental Information 7 — The total abundance of phylum-level sequences in chimera filtering that had a good match (>=99%) against the EUKARYOME database after the chimera filtering step with uchime_denovo, chimeras_denovo, and removeBimeraDenovo. Other (Eukaryotes) and other (Fungi) are related to the phyla because they have very low abundance, so they are categorized in these groups. [file peerj-13-20456-s007.xlsx]

## Sheet: Sheet1
Phylum	uchime_denovo	chimeras_denovo	removeBimeraDenovo
Ciliophora	2824	8615	18222
Dinoflagellata	1261	22166	40273
Others (Eukaryotes)	1073	4846	11371
Basidiomycota	994	15987	22591
Radiolaria	918	12166	21915
Diplonemia	799	-	-
Ascomycota	755	8725	15594
Rozellomycota	648	-	-
Arthropoda	499	37076	61685
Chlorophyta	358	2276	3750
Nematoda	327	1008	1651
Cnidaria	297	4593	7299
Cercozoa	197	2237	3497
Glomeromycota	168	-	-
Dictyochophyta	167	-	-
Chrysophyta	121	8953	14723
Gastrotricha	73	3082	4423
Bacillariophyta	62	2141	3341
Others (Fungi)	60	528	1208
Tracheophyta	-	5363	7328
Annelida	-	2207	2607
Katablepharidophyta	-	943	1384
Bryophyta	-	705	1017
